# Supplementary material for: Tyrosinase-based proximity labeling in living cells and in vivo
Source: Research Square preprint supplement (doi:10.21203/rs.3.rs-3354015/v1), 2023-09-20
Supplement: Supplementary file 1 [file 8ba49519b229aab8de6a1498.xlsx]

## Sheet: NAPS-BmTyr_b1
No.	Protein FDR Confidence: Combined	Master	Accession	Description	Exp. q-value: Combined	Sum PEP Score	Coverage [%]	# Peptides	# PSMs	# Unique Peptides	# AAs	MW [kDa]	calc. pI	Score Sequest HT: Sequest HT	# Peptides (by Search Engine): Sequest HT	Biological Process	Cellular Component	Molecular Function	Pfam IDs	Entrez Gene ID	Ensembl Gene ID	Gene Symbol	Gene ID	Reactome Pathways	WikiPathways	# Protein Pathway Groups	# Razor Peptides	Abundance Ratio: (mSPI) / (wt)	# Protein Groups
1	High	Master Protein	Q9R1V4	Disintegrin and metalloproteinase domain-containing protein 11 [OS=Mus musculus]	0	22.524	8	4	5	4	773	84.1	7.5	11.4	4	protein metabolism;stress response;other biological processes	plasma membrane;other membranes;other cell component	other molecular function	Pf00200, Pf01421, Pf01562, Pf07974, Pf08516	11488	ENSMUSG00000020926	Adam11	A2AUA8; mmu:11488; Q9R1V4	LGI-ADAM interactions		1	0	1000	1
2	High	Master Protein	P21995	Embigin [OS=Mus musculus]	0	11.863	12	4	5	4	330	37	6.02	7.54	4	cell adhesion;cell organization and biogenesis;transport;developmental processes	plasma membrane;other membranes;other cell component	other molecular function	Pf07679	13723	ENSMUSG00000021728	Emb	mmu:13723; P21995; Q3UFF1; Q8C2J8; Q8C543; Q96C38	Proton-coupled monocarboxylate transport		1	0	1000	1
3	High	Master Protein	O35409	Glutamate carboxypeptidase 2 [OS=Mus musculus]	0	16.791	6	4	6	4	752	84.5	8.1	16.17	4	protein metabolism;other metabolic processes;other biological processes	plasma membrane;other membranes;other cell component	other molecular function	Pf02225, Pf04253, Pf04389	53320	ENSMUSG00000001773	Folh1	mmu:53320; O35409; Q0VDM5; Q9DCC2	Aspartate and asparagine metabolism	One-carbon metabolism	2	0	1000	1
4	High	Master Protein	Q8BGT1	Leucine-rich repeat transmembrane protein FLRT3 [OS=Mus musculus]	0	16.436	7	4	4	4	649	72.8	8.06	4.54	4	cell adhesion;cell organization and biogenesis;stress response;developmental processes;signal transduction;other biological processes	non-structural extracellular;plasma membrane;other membranes;cytosol;ER/Golgi;other cell component	signal transduction activity or receptor binding;other molecular function	Pf13855	71436	ENSMUSG00000051379	Flrt3	mmu:71436; Q6ZPQ1; Q8BGT1	Downstream signaling of activated FGFR1		1	0	1000	1
5	High	Master Protein	Q9WTS6	Teneurin-3 [OS=Mus musculus]	0	15.207	2	4	4	4	2715	302.9	6.51	8.01	4	cell adhesion;developmental processes;signal transduction;other biological processes	plasma membrane;other membranes;other cell component	other molecular function	Pf06484, Pf15636			Tenm3	A0A2K9QKY6; A0A2K9QKZ0; A0A2K9QL01; A0A2K9QL03; A0A2K9QL04; A0A2K9QL11; A0A2K9QL36; A0A2K9QL87; Q3UVR9; Q3UX72; Q80TD2; Q8BSL5; Q9CSV2; Q9JLC1; Q9WTS6			0	0	1000	1
6	High	Master Protein	Q6X893	Choline transporter-like protein 1 [OS=Mus musculus]	0	23.639	10	5	8	5	653	73	8.75	19.52	5	transport	plasma membrane;other membranes;cytosol;mitochondrion;nucleus	transporter activity	Pf04515	100434	ENSMUSG00000028412	Slc44a1	mmu:100434; Q14DK0; Q6X893; Q6X894; Q8R0Y4; Q91Z29	Choline catabolism; Synthesis of PC; Transport of bile salts and organic acids, metal ions and amine compounds		3	0	1000	1
7	High	Master Protein	Q62178	Semaphorin-4A [OS=Mus musculus]	0	20.077	11	5	8	5	760	83.4	7.72	13.45	5	cell organization and biogenesis;developmental processes;signal transduction;other biological processes	plasma membrane;other membranes	signal transduction activity or receptor binding	Pf01403, Pf01437	20351	ENSMUSG00000028064	Sema4a	D3Z5L2; mmu:20351; Q62178	Other semaphorin interactions		1	0	1000	1
8	High	Master Protein	Q3UH93	Plexin-D1 [OS=Mus musculus]	0	25.42	5	8	10	6	1925	211.5	7.11	8.68	8	cell organization and biogenesis;developmental processes;signal transduction;other biological processes	plasma membrane;other membranes;other cell component	other molecular function	Pf01403, Pf01437, Pf01833, Pf08337, Pf17960, Pf20170	67784	ENSMUSG00000030123	Plxnd1	mmu:67784; Q3UH93; Q68HV1	RND2 GTPase cycle; Other semaphorin interactions		2	1	1000	1
9	High	Master Protein	P97772	Metabotropic glutamate receptor 1 [OS=Mus musculus]	0	23.537	6	7	10	7	1199	133.1	6.86	17.04	7	cell-cell signaling;transport;signal transduction;other biological processes	plasma membrane;other membranes;nucleus;other cell component	other molecular function	Pf00003, Pf01094, Pf07562, Pf10606	14816	ENSMUSG00000019828	Grm1	mmu:14816; P97772; Q6AXG4; Q9EPV6	G alpha (q) signalling events; Neurexins and neuroligins; Class C/3 (Metabotropic glutamate/pheromone receptors)	GPCRs, non-odorant ; Serotonin and anxiety; GPCRs, class C metabotropic glutamate, pheromone; GPCRs, other	7	0	1000	1
10	High	Master Protein	Q9WTS5	Teneurin-2 [OS=Mus musculus]	0	42.554	5	9	11	7	2764	306.3	6.68	19.04	9	cell adhesion;cell-cell signaling;cell organization and biogenesis;developmental processes;signal transduction;other biological processes	plasma membrane;other membranes;ER/Golgi;nucleus;other cell component	signal transduction activity or receptor binding;other molecular function	Pf06484, Pf15636			Tenm2	Q5NBW7; Q5NBW8; Q80TJ0; Q9JLC0; Q9QYZ1; Q9WTS5			0	0	1000	1
11	High	Master Protein	Q69ZU6	Thrombospondin type-1 domain-containing protein 7A [OS=Mus musculus]	0	59.356	10	13	20	13	1645	183.4	7.2	31.22	13	developmental processes;other biological processes	non-structural extracellular;plasma membrane;other membranes;other cell component		Pf00090, Pf19028, Pf19030	330267		Thsd7a	mmu:330267; Q3TP01; Q3UWV1; Q69ZU6	O-glycosylation of TSR domain-containing proteins		1	0	16.525	1
12	High	Master Protein	P97797	Tyrosine-protein phosphatase non-receptor type substrate 1 [OS=Mus musculus]	0	46.242	24	9	23	9	513	56.4	8.28	63.47	9	cell adhesion;cell organization and biogenesis;stress response;transport;other biological processes	plasma membrane;other membranes;other cell component	enzyme regulator activity;other molecular function	Pf07654, Pf07686	19261	ENSMUSG00000037902	Sirpa	A0A0R4J1Z7; E0CYM8; E9QPT7; mmu:19261; O08907; O35924; O88555; O88556; P97796; P97797; Q8R559; Q9QX57; Q9WTN4	Neutrophil degranulation; Cell surface interactions at the vascular wall; DAP12 interactions; Signal regulatory protein family interactions	IL-1 signaling pathway	5	0	16.025	1
13	High	Master Protein	Q8BLQ9	Cell adhesion molecule 2 [OS=Mus musculus]	0	82.522	36	14	41	14	435	47.5	5.41	106.24	14	cell adhesion;developmental processes	plasma membrane;other membranes;other cell component		Pf07686, Pf08205, Pf13927	239857	ENSMUSG00000064115	Cadm2	B1B1A5; B1B1A6; B2RTL0; mmu:239857; Q8BLQ9; Q8BXJ7; Q8BYP1; Q8BZP4	Adherens junctions interactions		1	0	15.93	1
14	High	Master Protein	Q6NXK7	Inactive dipeptidyl peptidase 10 [OS=Mus musculus]	0	57.036	24	16	26	14	797	90.8	6.48	48.43	16	protein metabolism;other biological processes	plasma membrane;other membranes	other molecular function	Pf00326, Pf00930	269109		Dpp10	mmu:269109; Q6NXK7; Q6P554; Q8K1H0			0	0	13.846	1
15	High	Master Protein	Q8BLK3	Limbic system-associated membrane protein [OS=Mus musculus]	0	68.188	37	14	41	14	341	38.1	6.65	93.2	14	cell adhesion;other biological processes	plasma membrane;other membranes;cytosol		Pf07679, Pf13927		ENSMUSG00000061080	Lsamp	Q8BLK3	Post-translational modification: synthesis of GPI-anchored proteins		1	0	13.391	1
16	High	Master Protein	Q61490	CD166 antigen [OS=Mus musculus]	0	173.669	48	22	73	22	583	65.1	6.15	201.34	22	cell adhesion;cell organization and biogenesis;developmental processes;other biological processes	plasma membrane;other membranes;other cell component	other molecular function	Pf08205, Pf13927	11658	ENSMUSG00000022636	Alcam	mmu:11658; O70136; Q61490; Q8CDA5; Q8R2T0			0	0	12.738	1
17	High	Master Protein	Q03137	Ephrin type-A receptor 4 [OS=Mus musculus]	0	43.688	12	9	13	9	986	109.7	6.51	31.46	9	cell adhesion;cell organization and biogenesis;protein metabolism;other metabolic processes;developmental processes;signal transduction;other biological processes	plasma membrane;other membranes;mitochondrion;ER/Golgi;other cytoplasmic organelle;other cell component	signal transduction activity or receptor binding;kinase activity;other molecular function	Pf00041, Pf01404, Pf07647, Pf07699, Pf07714, Pf14575	13838	ENSMUSG00000026235	Epha4	mmu:13838; Q03137; Q80VZ2	EPHA-mediated growth cone collapse; EPH-ephrin mediated repulsion of cells	Spinal cord injury; Gene regulatory network modelling somitogenesis	5	0	11.544	1
18	High	Master Protein	Q80Z24	Neuronal growth regulator 1 [OS=Mus musculus]	0	62.853	41	10	17	10	348	37.9	6.52	47.68	10	cell adhesion;cell organization and biogenesis;developmental processes;other biological processes	plasma membrane;other membranes;other cell component		Pf07679, Pf13927	320840	ENSMUSG00000040037	Negr1	mmu:320840; Q3UHQ8; Q80T70; Q80Z24	Post-translational modification: synthesis of GPI-anchored proteins		1	0	11.239	1
19	High	Master Protein	Q9QZF2	Glypican-1 [OS=Mus musculus]	0	69.106	29	13	28	13	557	61.3	7.05	74.01	13	cell organization and biogenesis;protein metabolism;other metabolic processes;developmental processes;other biological processes	non-structural extracellular;extracellular matrix;plasma membrane;other membranes;cytosol;ER/Golgi;nucleus;other cytoplasmic organelle;other cell component	other molecular function	Pf01153	14733	ENSMUSG00000034220	Gpc1	mmu:14733; Q9QZF2	Cell surface interactions at the vascular wall; A tetrasaccharide linker sequence is required for GAG synthesis; Retinoid metabolism and transport; HS-GAG biosynthesis; HS-GAG degradation; Signaling by ROBO receptors		6	0	11.214	1
20	High	Master Protein	Q9Z218	Dipeptidyl aminopeptidase-like protein 6 [OS=Mus musculus]	0	103.646	26	19	46	17	804	91.2	6.68	124.69	19	protein metabolism;transport;other biological processes	plasma membrane;other membranes;other cell component	other molecular function	Pf00326, Pf00930	13483	ENSMUSG00000061576	Dpp6	mmu:13483; Q9QWW2; Q9Z218; Q9Z219			0	2	10.72	1
21	High	Master Protein	P39087	Glutamate receptor ionotropic, kainate 2 [OS=Mus musculus]	0	37.044	10	7	12	7	908	102.4	7.77	29.86	7	cell-cell signaling;stress response;transport;signal transduction;other biological processes	plasma membrane;other membranes;other cell component	transporter activity;other molecular function	Pf00060, Pf01094, Pf10613		ENSMUSG00000056073	Grik2	P39087; Q60933	Activation of Ca-permeable Kainate Receptor; Activation of Na-permeable kainate receptors		2	0	10.469	1
22	High	Master Protein	Q9QUR8	Semaphorin-7A [OS=Mus musculus]	0	88.275	32	15	33	15	664	74.9	7.74	92.18	15	cell organization and biogenesis;protein metabolism;other metabolic processes;stress response;developmental processes;signal transduction;other biological processes	plasma membrane;other membranes	signal transduction activity or receptor binding	Pf01403, Pf01437	20361	ENSMUSG00000038264	Sema7a	mmu:20361; O88371; Q9QUR8	Other semaphorin interactions		1	0	10.069	1
23	High	Master Protein	P13595	Neural cell adhesion molecule 1 [OS=Mus musculus]	0	252.374	40	34	132	34	1115	119.4	4.83	312.21	34	cell adhesion;cell organization and biogenesis;stress response;developmental processes;signal transduction;other biological processes	plasma membrane;other membranes;cytosol;other cell component	other molecular function	Pf00041, Pf07679, Pf13927	17967		Ncam1	mmu:17967; P13594; P13595; Q61949; Q61950; Q6LBU8; Q8BQ96; Q8C4B2; Q921P2; Q9R2A7	RAF/MAP kinase cascade; NCAM1 interactions; Signal transduction by L1		4	0	9.881	1
24	High	Master Protein	Q14CH0	Protein FAM171B [OS=Mus musculus]	0	43.593	12	7	9	7	825	92	8.37	24.33	7		other membranes		Pf10577	241520	ENSMUSG00000048388	Fam171b	mmu:241520; Q14CH0; Q8C756; Q8CAF3; Q8CBZ4; Q8CFT5			0	0	9.742	1
25	High	Master Protein	P11627	Neural cell adhesion molecule L1 [OS=Mus musculus]	0	156.729	24	22	81	22	1260	140.9	5.97	215.03	22	cell adhesion;cell organization and biogenesis;developmental processes;signal transduction;other biological processes	plasma membrane;other membranes;other cytoplasmic organelle;other cell component	signal transduction activity or receptor binding;other molecular function	Pf00041, Pf07679, Pf13882, Pf13927			L1cam	P11627	Interaction between L1 and Ankyrins; Recycling pathway of L1; Signal transduction by L1		4	0	9.564	1
26	High	Master Protein	Q68FM6	Protein phosphatase 1 regulatory subunit 29 [OS=Mus musculus]	0	43.469	11	6	10	6	823	90	7.52	25.09	6		non-structural extracellular;extracellular matrix;other membranes	enzyme regulator activity	Pf13855	207393	ENSMUSG00000043460	Elfn2	mmu:207393; Q68FM6; Q69Z72; Q8CCW8			0	0	9.444	1
27	High	Master Protein	O88998	Noelin [OS=Mus musculus]	0	73.058	25	11	31	11	485	55.4	6.95	83.35	11	cell organization and biogenesis;developmental processes;signal transduction;other biological processes	non-structural extracellular;plasma membrane;other membranes;ER/Golgi;other cell component		Pf02191, Pf12308	56177	ENSMUSG00000026833	Olfm1	A3KGE5; mmu:56177; O35429; O88998; O88999; Q91XK8; Q9QWQ9; Q9QWR0			0	0	9.228	1
28	High	Master Protein	Q9D1T0	Leucine-rich repeat and immunoglobulin-like domain-containing nogo receptor-interacting protein 1 [OS=Mus musculus]	0	60.151	22	10	19	10	614	69.1	8.31	55.56	10	cell organization and biogenesis;developmental processes;signal transduction;other biological processes	non-structural extracellular;extracellular matrix;plasma membrane;other membranes	signal transduction activity or receptor binding	Pf07679, Pf13855	235402	ENSMUSG00000049556	Lingo1	mmu:235402; Q3TQJ4; Q6VVF9; Q7TT38; Q9D1T0	Axonal growth inhibition (RHOA activation)	mRNA processing	2	0	9.146	1
29	High	Master Protein	B1AS29	Glutamate receptor ionotropic, kainate 3 [OS=Mus musculus]	0	37.019	10	7	13	7	919	104	7.52	23	7	cell-cell signaling;transport;signal transduction;other biological processes	plasma membrane;other membranes;other cell component	transporter activity;other molecular function	Pf00060, Pf01094, Pf10613	14807	ENSMUSG00000001985	Grik3	B1AS29; mmu:14807; Q17R20; Q9JIA8	Presynaptic function of Kainate receptors; Activation of Ca-permeable Kainate Receptor		2	0	9.083	1
30	High	Master Protein	P55066	Neurocan core protein [OS=Mus musculus]	0	80.102	16	17	44	17	1268	137.1	5.72	83.94	17	cell adhesion;developmental processes;other biological processes	non-structural extracellular;extracellular matrix;plasma membrane;other membranes;other cell component	other molecular function	Pf00008, Pf00059, Pf00084, Pf00193, Pf07686	13004		Ncan	mmu:13004; P55066; Q6P1E3; Q8C4F8	ECM proteoglycans; A tetrasaccharide linker sequence is required for GAG synthesis; Chondroitin sulfate biosynthesis; CS/DS degradation; Dermatan sulfate biosynthesis		5	0	9.019	1
31	High	Master Protein	O35136	Neural cell adhesion molecule 2 [OS=Mus musculus]	0	67.432	24	15	30	15	837	93.1	6.07	80.14	15	cell adhesion;cell organization and biogenesis;developmental processes;other biological processes	plasma membrane;other membranes;nucleus;other cell component	other molecular function	Pf00041, Pf07679, Pf13927	17968	ENSMUSG00000022762	Ncam2	mmu:17968; O35136; O35962; Q0VF23			0	0	9.009	1
32	High	Master Protein	O55026	Ectonucleoside triphosphate diphosphohydrolase 2 [OS=Mus musculus]	0	20.995	8	4	7	4	495	54.3	8.37	20.83	4	other metabolic processes;stress response;signal transduction;other biological processes	extracellular matrix;plasma membrane;other membranes;other cell component	other molecular function	Pf01150	12496	ENSMUSG00000015085	Entpd2	mmu:12496; O35928; O55026; Q9DCR9	Phosphate bond hydrolysis by NTPDase proteins	Purine metabolism	2	0	8.894	1
33	High	Master Protein	P01831	Thy-1 membrane glycoprotein [OS=Mus musculus]	0	13.819	25	4	10	4	162	18.1	8.97	30.29	4	cell adhesion;cell-cell signaling;cell organization and biogenesis;protein metabolism;other metabolic processes;developmental processes;signal transduction;other biological processes	plasma membrane;other membranes;cytosol;ER/Golgi;other cell component	signal transduction activity or receptor binding;enzyme regulator activity;other molecular function	Pf00047	21838	ENSMUSG00000032011	Thy1	mmu:21838; P01831	Post-translational modification: synthesis of GPI-anchored proteins		1	0	8.786	1
34	High	Master Protein	O08842	GDNF family receptor alpha-2 [OS=Mus musculus]	0	30.582	16	6	11	6	464	51.7	7.75	31.05	6	developmental processes;signal transduction;other biological processes	plasma membrane;other membranes;other cell component	other molecular function	Pf02351	14586	ENSMUSG00000022103	Gfra2	mmu:14586; O08842; Q3UUD8; Q920Y3; Q9Z2A2; Q9Z2A3	RAF/MAP kinase cascade; RET signaling		2	0	8.726	1
35	High	Master Protein	Q80UG2	Plexin-A4 [OS=Mus musculus]	0	132.548	14	25	54	13	1893	212.4	6.83	128.09	25	cell organization and biogenesis;developmental processes;signal transduction;other biological processes	plasma membrane;other membranes;other cell component	other molecular function	Pf01403, Pf01437, Pf01833, Pf08337, Pf17960, Pf18020, Pf20170	243743	ENSMUSG00000029765	Plxna4	E9QN64; mmu:243743; Q5DTW8; Q80UG2; Q8BKK9	CRMPs in Sema3A signaling; Sema3A PAK dependent Axon repulsion; SEMA3A-Plexin repulsion signaling by inhibiting Integrin adhesion		3	1	8.702	1
36	High	Master Protein	Q71M36	Chondroitin sulfate proteoglycan 5 [OS=Mus musculus]	0	30.247	17	6	8	6	566	60.4	4.54	15.16	6	cell organization and biogenesis;stress response;developmental processes;other biological processes	non-structural extracellular;plasma membrane;other membranes;ER/Golgi;other cell component		Pf06566, Pf06567	29873	ENSMUSG00000032482	Cspg5	E9QN54; mmu:29873; Q71M36; Q71M37; Q7TNT8; Q8BPJ5; Q9QY32	A tetrasaccharide linker sequence is required for GAG synthesis; Chondroitin sulfate biosynthesis; CS/DS degradation; Dermatan sulfate biosynthesis		4	0	8.551	1
37	High	Master Protein	Q69ZK9	Neuroligin-2 [OS=Mus musculus]	0	58.097	21	12	17	9	836	90.9	6.18	41.1	12	cell adhesion;cell-cell signaling;cell organization and biogenesis;protein metabolism;other metabolic processes;transport;developmental processes;other biological processes	plasma membrane;other membranes;other cell component	signal transduction activity or receptor binding;other molecular function	Pf00135	216856	ENSMUSG00000051790	Nlgn2	mmu:216856; Q5F288; Q69ZK9	Neurexins and neuroligins		1	2	8.498	1
38	High	Master Protein	Q9WV18	Gamma-aminobutyric acid type B receptor subunit 1 [OS=Mus musculus]	0	28.709	7	6	9	6	960	108.1	8.21	13.43	6	cell-cell signaling;signal transduction;other biological processes	non-structural extracellular;plasma membrane;other membranes;mitochondrion;ER/Golgi;other cell component	other molecular function	Pf00003, Pf00084, Pf01094	54393	ENSMUSG00000024462	Gabbr1	mmu:54393; Q6PGJ2; Q9WU48; Q9WV15; Q9WV16; Q9WV17; Q9WV18	G alpha (i) signalling events; Activation of G protein gated Potassium channels; Inhibition of voltage gated Ca2+ channels via Gbeta/gamma subunits; Class C/3 (Metabotropic glutamate/pheromone receptors); GABA B receptor activation	GPCRs, non-odorant ; GPCRs, class A rhodopsin-like; GPCRs, class C metabotropic glutamate, pheromone; GPCRs, other	9	0	8.276	1
39	High	Master Protein	Q8C3Q5	Protein shisa-7 [OS=Mus musculus]	0	23.194	11	5	12	5	558	58.3	9.82	27.53	5	cell-cell signaling;cell organization and biogenesis;other biological processes	plasma membrane;other membranes;other cell component	signal transduction activity or receptor binding	Pf13908	232813	ENSMUSG00000053550	Shisa7	A0A172Q401; A0A172Q418; mmu:232813; Q3UMB3; Q8C3Q5			0	0	8.216	1
40	High	Master Protein	Q80T41	Gamma-aminobutyric acid type B receptor subunit 2 [OS=Mus musculus]	0	62.612	15	14	32	14	940	105.6	8.72	52.28	14	cell-cell signaling;signal transduction	plasma membrane;other membranes;other cell component	other molecular function	Pf00003, Pf01094, Pf18455	242425	ENSMUSG00000039809	Gabbr2	A2AL05; mmu:242425; Q80T41	G alpha (i) signalling events; Activation of G protein gated Potassium channels; Inhibition of voltage gated Ca2+ channels via Gbeta/gamma subunits; Class C/3 (Metabotropic glutamate/pheromone receptors); GABA B receptor activation	GPCRs, non-odorant ; Splicing factor NOVA regulated synaptic proteins; GPCRs, class C metabotropic glutamate, pheromone	8	0	8.196	1
41	High	Master Protein	Q62165	Dystroglycan 1 [OS=Mus musculus]	0	35.435	6	5	8	5	893	96.8	8.44	23.56	5	cell adhesion;cell-cell signaling;cell organization and biogenesis;protein metabolism;stress response;transport;developmental processes;other biological processes	non-structural extracellular;extracellular matrix;plasma membrane;other membranes;cytosol;cytoskeleton;nucleus;other cell component	cytoskeletal activity;other molecular function	Pf05454, Pf18424	13138	ENSMUSG00000039952	Dag1	mmu:13138; Q61094; Q61141; Q61497; Q62165	Regulation of expression of SLITs and ROBOs; O-linked glycosylation	Primary focal segmental glomerulosclerosis (FSGS)	3	0	8.089	1
42	High	Master Protein	Q14BI2	Metabotropic glutamate receptor 2 [OS=Mus musculus]	0	87.2	21	17	61	14	872	95.8	8.06	95.32	17	other metabolic processes;transport;signal transduction;other biological processes	plasma membrane;other membranes;other cell component	other molecular function	Pf00003, Pf01094, Pf07562	108068	ENSMUSG00000023192	Grm2	mmu:108068; Q14BI2	G alpha (i) signalling events; Class C/3 (Metabotropic glutamate/pheromone receptors)	GPCRs, non-odorant ; GPCRs, class C metabotropic glutamate, pheromone	4	2	8.009	1
43	High	Master Protein	Q02105	Complement C1q subcomponent subunit C [OS=Mus musculus]	0	23.367	20	4	12	4	246	26	8.54	27.95	4	cell organization and biogenesis;stress response;other biological processes	non-structural extracellular;other cell component		Pf00386, Pf01391	12262	ENSMUSG00000036896	C1qc	mmu:12262; Q02105; Q6DI63	Initial triggering of complement; Classical antibody-mediated complement activation; Regulation of Complement cascade	Oxidative damage response; Complement activation, classical pathway; Tyrobp causal network in microglia; Microglia pathogen phagocytosis pathway	7	0	7.98	1
44	High	Master Protein	Q3UVX5	Metabotropic glutamate receptor 5 [OS=Mus musculus]	0	102.696	23	22	50	22	1203	131.8	7.84	109.13	22	cell-cell signaling;cell organization and biogenesis;protein metabolism;other metabolic processes;signal transduction;other biological processes	plasma membrane;other membranes;other cell component	signal transduction activity or receptor binding;other molecular function	Pf00003, Pf01094, Pf07562, Pf10606	108071	ENSMUSG00000049583	Grm5	mmu:108071; Q3UVX5	G alpha (q) signalling events; Neurexins and neuroligins; Class C/3 (Metabotropic glutamate/pheromone receptors)	GPCRs, non-odorant ; GPCRs, class C metabotropic glutamate, pheromone	5	0	7.806	1
45	High	Master Protein	Q61330	Contactin-2 [OS=Mus musculus]	0	80.644	20	15	38	15	1040	113.1	7.62	86.36	15	cell adhesion;cell organization and biogenesis;protein metabolism;other metabolic processes;transport;developmental processes;signal transduction;other biological processes	plasma membrane;other membranes;other cell component	other molecular function	Pf00041, Pf07679, Pf13927	21367	ENSMUSG00000053024	Cntn2	mmu:21367; Q61330; Q6NZJ4; Q7TSJ5			0	0	7.779	1
46	High	Master Protein	P23819	Glutamate receptor 2 [OS=Mus musculus]	0	156.369	34	22	62	19	883	98.6	7.39	193.2	22	cell-cell signaling;cell organization and biogenesis;transport;signal transduction;other biological processes	non-structural extracellular;plasma membrane;other membranes;ER/Golgi;other cell component	signal transduction activity or receptor binding;transporter activity;cytoskeletal activity;other molecular function	Pf00060, Pf01094, Pf10613			Gria2	P23819; Q61604; Q61605; Q8BG69; Q8BXU3; Q9D6D3	Trafficking of GluR2-containing AMPA receptors; Unblocking of NMDA receptors, glutamate binding and activation; Activation of AMPA receptors		3	1	7.766	1
47	High	Master Protein	Q810U4	Neuronal cell adhesion molecule [OS=Mus musculus]	0	165.168	27	24	70	24	1256	138.4	5.91	206.77	24	cell adhesion;cell organization and biogenesis;developmental processes;other biological processes	non-structural extracellular;plasma membrane;other membranes;other cell component	cytoskeletal activity;other molecular function	Pf00041, Pf07679, Pf13882, Pf13927	319504	ENSMUSG00000020598	Nrcam	mmu:319504; Q80U33; Q810U4; Q8BLG8; Q8BX92; Q8BYJ8			0	0	7.711	1
48	High	Master Protein	Q80V42	Carboxypeptidase M [OS=Mus musculus]	0	35.671	16	7	14	7	443	50.5	7.78	29.92	7	protein metabolism;other metabolic processes	non-structural extracellular;plasma membrane;other membranes	other molecular function	Pf00246, Pf13620	70574	ENSMUSG00000020183	Cpm	mmu:70574; Q497S5; Q80V42; Q9CYH8	Post-translational modification: synthesis of GPI-anchored proteins		1	0	7.697	1
49	High	Master Protein	P51655	Glypican-4 [OS=Mus musculus]	0	40.376	15	6	9	6	557	62.5	6.33	22	6	cell adhesion;cell-cell signaling;cell organization and biogenesis;signal transduction;other biological processes	plasma membrane;other membranes;ER/Golgi;other cell component		Pf01153	14735	ENSMUSG00000031119	Gpc4	mmu:14735; P51655; Q923C8	Retinoid metabolism and transport; A tetrasaccharide linker sequence is required for GAG synthesis; HS-GAG biosynthesis; HS-GAG degradation		4	0	7.679	1
50	High	Master Protein	Q9JIA1	Leucine-rich glioma-inactivated protein 1 [OS=Mus musculus]	0	88.499	37	21	60	21	557	63.6	8.02	146.04	21	cell organization and biogenesis;developmental processes;other biological processes	non-structural extracellular;ER/Golgi;other cell component	signal transduction activity or receptor binding	Pf03736, Pf13855	56839	ENSMUSG00000067242	Lgi1	A0A0G2JFT0; mmu:56839; Q9JIA1	LGI-ADAM interactions		1	0	7.644	1
51	High	Master Protein	Q63912	Oligodendrocyte-myelin glycoprotein [OS=Mus musculus]	0	35.26	12	5	13	5	440	49.3	8.41	37.11	5	cell adhesion;cell organization and biogenesis;stress response;developmental processes	plasma membrane;other membranes;other cell component	other molecular function	Pf00560, Pf01462, Pf13855	18377		Omg	mmu:18377; Q63912	Axonal growth inhibition (RHOA activation)		1	0	7.625	1
52	High	Master Protein	Q99N28	Cell adhesion molecule 3 [OS=Mus musculus]	0	54.887	27	6	15	6	396	42.9	5.8	59.05	6	cell adhesion;other biological processes	plasma membrane;other membranes;other cell component	other molecular function	Pf07679, Pf08205, Pf13927	94332	ENSMUSG00000005338	Cadm3	mmu:94332; Q8BSQ8; Q8K1H8; Q99N28	Nectin/Necl trans heterodimerization	Splicing factor NOVA regulated synaptic proteins	3	0	7.585	1
53	High	Master Protein	Q9ESM3	Hyaluronan and proteoglycan link protein 2 [OS=Mus musculus]	0	32.978	22	8	22	8	341	37.9	9.09	34.62	8	cell adhesion;cell organization and biogenesis;developmental processes;other biological processes	non-structural extracellular;extracellular matrix;other cell component	other molecular function	Pf00193, Pf07686	73940	ENSMUSG00000004894	Hapln2	mmu:73940; Q9ESM3			0	0	7.535	1
54	High	Master Protein	Q9Z2W9	Glutamate receptor 3 [OS=Mus musculus]	0	90.016	24	17	35	13	888	100.5	8.38	104.71	17	cell-cell signaling;transport;signal transduction;other biological processes	non-structural extracellular;plasma membrane;other membranes;other cell component	transporter activity;other molecular function	Pf00060, Pf01094, Pf10613	53623	ENSMUSG00000001986	Gria3	A2VDF4; mmu:53623; Q5DTJ0; Q9Z2W9	Trafficking of GluR2-containing AMPA receptors; Unblocking of NMDA receptors, glutamate binding and activation; Synaptic adhesion-like molecules; Activation of AMPA receptors		5	1	7.295	1
55	High	Master Protein	P23818	Glutamate receptor 1 [OS=Mus musculus]	0	125.207	29	25	51	22	907	101.5	7.69	121.69	25	cell-cell signaling;cell organization and biogenesis;transport;developmental processes;signal transduction;other biological processes	non-structural extracellular;plasma membrane;other membranes;cytosol;ER/Golgi;other cytoplasmic organelle;other cell component	signal transduction activity or receptor binding;transporter activity;cytoskeletal activity;other molecular function	Pf00060, Pf01094, Pf10613	14799	ENSMUSG00000020524	Gria1	mmu:14799; P23818	Synaptic adhesion-like molecules; COPII-mediated vesicle transport; Cargo concentration in the ER; Trafficking of GluR2-containing AMPA receptors; Unblocking of NMDA receptors, glutamate binding and activation; Activation of AMPA receptors		7	2	7.275	1
56	High	Master Protein	Q9R1V7	Disintegrin and metalloproteinase domain-containing protein 23 [OS=Mus musculus]	0	75.905	20	12	28	12	829	91.5	7.68	75.5	12	cell adhesion;protein metabolism;other biological processes	non-structural extracellular;plasma membrane;other membranes;other cell component	other molecular function	Pf00200, Pf01421, Pf01562, Pf08516	23792	ENSMUSG00000025964	Adam23	mmu:23792; Q6QDY9; Q6QDZ0; Q8CC33; Q9R1V7	LGI-ADAM interactions		1	0	7.143	1
57	High	Master Protein	O08532	Voltage-dependent calcium channel subunit alpha-2/delta-1 [OS=Mus musculus]	0	51.453	11	9	15	9	1103	124.6	5.3	48.53	9	cell-cell signaling;transport;other biological processes	plasma membrane;other membranes;cytosol;ER/Golgi;other cell component	transporter activity;other molecular function	Pf08399, Pf08473, Pf13768	12293	ENSMUSG00000040118	Cacna2d1	mmu:12293; O08532; O08533; O08534; O08535; O08536			0	0	7.131	1
58	High	Master Protein	Q920P3	BMP/retinoic acid-inducible neural-specific protein 1 [OS=Mus musculus]	0	66.461	22	15	32	15	760	88.6	8.97	58.01	15	cell cycle OR cell proliferation;stress response;developmental processes;other biological processes	other cell component		Pf01823, Pf19052	56710	ENSMUSG00000028351	Brinp1	mmu:56710; Q80ZL2; Q812F0; Q8C1C9; Q920P3; Q920P4; Q9QXL0			0	0	7.101	1
59	High	Master Protein	Q60625	Intercellular adhesion molecule 5 [OS=Mus musculus]	0	54.325	16	13	31	13	917	96.9	6.32	48.87	13	cell adhesion;transport;other biological processes	plasma membrane;other membranes;other cell component	signal transduction activity or receptor binding	Pf03921, Pf13927	15898	ENSMUSG00000032174	Icam5	G5E826; mmu:15898; Q2KHL7; Q3UY19; Q60625	Immunoregulatory interactions between a Lymphoid and a non-Lymphoid cell; Integrin cell surface interactions		2	0	7.076	1
60	High	Master Protein	Q69Z26	Contactin-4 [OS=Mus musculus]	0	40.846	11	8	14	8	1026	113.4	7.36	34.07	8	cell adhesion;cell organization and biogenesis;developmental processes;other biological processes	non-structural extracellular;plasma membrane;other membranes		Pf00041, Pf07679, Pf13927	269784	ENSMUSG00000064293	Cntn4	mmu:269784; Q14BL8; Q69Z26; Q8BRT6; Q8CBD3			0	0	7.07	1
61	High	Master Protein	Q9QYS2	Metabotropic glutamate receptor 3 [OS=Mus musculus]	0	184.46	33	29	106	27	879	99.1	7.75	230.27	29	cell-cell signaling;other metabolic processes;signal transduction;other biological processes	plasma membrane;other membranes;other cell component	other molecular function	Pf00003, Pf01094, Pf07562	108069	ENSMUSG00000003974	Grm3	mmu:108069; Q14DJ9; Q9QYS2	G alpha (i) signalling events; Class C/3 (Metabotropic glutamate/pheromone receptors)	GPCRs, non-odorant ; GPCRs, class C metabotropic glutamate, pheromone	4	3	7.007	1
62	High	Master Protein	Q9DB72	BTB/POZ domain-containing protein 17 [OS=Mus musculus]	0	141.153	50	18	50	18	478	52.6	9.42	174.3	18		non-structural extracellular		Pf00651, Pf07707	72014	ENSMUSG00000000202	Btbd17	mmu:72014; Q9DB72			0	0	6.972	1
63	High	Master Protein	Q8VCC9	Spondin-1 [OS=Mus musculus]	0	15.862	8	5	11	5	807	90.8	6.02	21.42	5	cell adhesion;protein metabolism;other metabolic processes;other biological processes	non-structural extracellular;extracellular matrix	other molecular function	Pf00090, Pf02014, Pf06468, Pf19028	233744	ENSMUSG00000038156	Spon1	mmu:233744; Q8K2Q8; Q8VCC9	O-glycosylation of TSR domain-containing proteins		1	0	6.888	1
64	High	Master Protein	Q810U3	Neurofascin [OS=Mus musculus]	0	158.239	27	25	77	25	1240	137.9	6.19	218.86	25	cell adhesion;cell organization and biogenesis;developmental processes;other biological processes	plasma membrane;other membranes;other cell component	other molecular function	Pf00041, Pf00047, Pf07679, Pf13882, Pf13927	269116	ENSMUSG00000026442	Nfasc	mmu:269116; Q810U3	Neutrophil degranulation; Neurofascin interactions		2	0	6.864	1
65	High	Master Protein	P14106	Complement C1q subcomponent subunit B [OS=Mus musculus]	0	12.52	16	4	14	4	253	26.7	8.15	24.62	4	cell organization and biogenesis;stress response;other biological processes	non-structural extracellular;other cell component	other molecular function	Pf00386, Pf01391	12260	ENSMUSG00000036905	C1qb	mmu:12260; P14106; Q3U793	Initial triggering of complement; Classical antibody-mediated complement activation; Regulation of Complement cascade	Oxidative damage response; Complement activation, classical pathway; Microglia pathogen phagocytosis pathway	6	0	6.679	1
66	High	Master Protein	Q8BYM5	Neuroligin-3 [OS=Mus musculus]	0	39.664	13	7	18	7	825	91.1	5.8	53.63	7	cell adhesion;cell-cell signaling;cell organization and biogenesis;transport;developmental processes;signal transduction;other biological processes	plasma membrane;other membranes;other cell component	signal transduction activity or receptor binding;other molecular function	Pf00135	245537	ENSMUSG00000031302	Nlgn3	A2AGI1; mmu:245537; Q8BXR4; Q8BYM5	Neurexins and neuroligins		1	0	6.673	1
67	High	Master Protein	Q8BGN3	Glycerophosphocholine cholinephosphodiesterase ENPP6 [OS=Mus musculus]	0	72.557	29	11	28	11	440	50.6	7.31	76.28	11	other metabolic processes	non-structural extracellular;plasma membrane;other membranes	other molecular function	Pf01663	320981	ENSMUSG00000038173	Enpp6	mmu:320981; Q4VAH5; Q8BGN3	Glycerophospholipid catabolism		1	0	6.633	1
68	High	Master Protein	Q8C419	Probable G-protein coupled receptor 158 [OS=Mus musculus]	0	386.63	50	51	184	51	1200	134.3	8.09	478.78	51	signal transduction;other biological processes	plasma membrane;other membranes	other molecular function	Pf00003	241263	ENSMUSG00000045967	Gpr158	B1AWY4; mmu:241263; Q8C419; Q8CHB0		GPCRs, odorant	1	0	6.47	1
69	High	Master Protein	Q99PJ0	Neurotrimin [OS=Mus musculus]	0	89.322	40	12	84	12	344	38	7.81	235.43	12	cell adhesion;other biological processes	non-structural extracellular;plasma membrane;other membranes;other cell component		Pf07679, Pf13927		ENSMUSG00000059974	Ntm	Q99PJ0	Post-translational modification: synthesis of GPI-anchored proteins		1	0	6.428	1
70	High	Master Protein	Q80TR1	Adhesion G protein-coupled receptor L1 [OS=Mus musculus]	0	86.688	13	14	22	14	1466	161.6	6.48	70.4	14	cell adhesion;signal transduction;other biological processes	plasma membrane;other membranes;other cell component	other molecular function	Pf00002, Pf01825, Pf02140, Pf02191, Pf02354, Pf02793, Pf16489	330814	ENSMUSG00000013033	Adgrl1	mmu:330814; Q3UH90; Q7TNE5; Q80T49; Q80TR1		GPCRs, non-odorant ; GPCRs, class B secretin-like	2	0	6.398	1
71	High	Master Protein	Q3UHK6	Teneurin-4 [OS=Mus musculus]	0	57.569	7	17	23	14	2771	308.2	6.57	38.83	17	cell adhesion;cell cycle OR cell proliferation;cell organization and biogenesis;developmental processes;signal transduction;other biological processes	plasma membrane;other membranes;nucleus;other cell component	other molecular function	Pf05593, Pf06484, Pf07974, Pf15636	23966	ENSMUSG00000048078	Tenm4	mmu:23966; O70465; Q3TSI0; Q3UH52; Q3UHK6; Q80TF5; Q9WTS7			0	2	6.32	1
72	High	Master Protein	P97300	Neuroplastin [OS=Mus musculus]	0	80.81	28	10	60	10	397	44.3	7.74	127.5	10	cell adhesion;cell-cell signaling;cell organization and biogenesis;developmental processes;other biological processes	plasma membrane;other membranes;other cell component	signal transduction activity or receptor binding;other molecular function	Pf13927	20320	ENSMUSG00000032336	Nptn	mmu:20320; P97300; Q3U519; Q8C637; Q8C6H8			0	0	6.185	1
73	High	Master Protein	Q62443	Neuronal pentraxin-1 [OS=Mus musculus]	0	33.809	18	7	11	7	432	47.1	6.44	20.74	7	cell organization and biogenesis;transport;developmental processes;other biological processes	non-structural extracellular;plasma membrane;other membranes;mitochondrion;ER/Golgi;other cell component	other molecular function	Pf00354	18164	ENSMUSG00000025582	Nptx1	mmu:18164; Q62443			0	0	6.09	1
74	High	Master Protein	Q61137	Astrotactin-1 [OS=Mus musculus]	0	39.938	8	7	9	7	1302	144.8	5.21	26.74	7	cell adhesion;developmental processes;other biological processes	plasma membrane;other membranes;other cytoplasmic organelle;other cell component		Pf14670, Pf18411, Pf19441, Pf19743	11899	ENSMUSG00000026587	Astn1	G5E8A1; mmu:11899; Q505A0; Q61137; Q7TQG3; Q8CHH2			0	0	6.08	1
75	High	Master Protein	Q64487	Receptor-type tyrosine-protein phosphatase delta [OS=Mus musculus]	0	183.256	25	32	64	28	1912	214.3	6.55	165.74	32	cell adhesion;cell-cell signaling;cell organization and biogenesis;protein metabolism;other metabolic processes;developmental processes;other biological processes	plasma membrane;other membranes;other cell component	signal transduction activity or receptor binding;other molecular function	Pf00041, Pf00102, Pf07679, Pf13927	19266	ENSMUSG00000028399	Ptprd	G3X9S7; mmu:19266; Q64486; Q64487; Q64488; Q64495; Q8VBV0	Synaptic adhesion-like molecules; Receptor-type tyrosine-protein phosphatases		2	4	6.03	1
76	High	Master Protein	P05532	Mast/stem cell growth factor receptor Kit [OS=Mus musculus]	0	22.297	6	4	7	4	979	109.3	7.21	15.01	4	cell adhesion;cell cycle OR cell proliferation;cell organization and biogenesis;protein metabolism;other metabolic processes;stress response;transport;developmental processes;signal transduction;other biological processes	non-structural extracellular;plasma membrane;other membranes;nucleus;other cell component	kinase activity;other molecular function	Pf00047, Pf07714	16590	ENSMUSG00000005672	Kit	mmu:16590; P05532; Q61415; Q61416; Q61417; Q6LEE9; Q6QJB7; Q6QJB8; Q7TS86; Q8C8K9	RAF/MAP kinase cascade; PIP3 activates AKT signaling; PI5P, PP2A and IER3 Regulate PI3K/AKT Signaling; Regulation of KIT signaling	Focal adhesion: PI3K-Akt-mTOR signaling pathway; Kit receptor signaling pathway	7	0	5.86	1
77	High	Master Protein	O09126	Semaphorin-4D [OS=Mus musculus]	0	24.004	6	4	14	4	861	95.6	7.81	23.01	4	cell adhesion;cell organization and biogenesis;developmental processes;signal transduction;other biological processes	non-structural extracellular;plasma membrane;other membranes	signal transduction activity or receptor binding;other molecular function	Pf00047, Pf01403, Pf01437	20354	ENSMUSG00000021451	Sema4d	mmu:20354; O09126; Q6GTM9	Sema4D mediated inhibition of cell attachment and migration; Sema4D induced cell migration and growth-cone collapse; Other semaphorin interactions		3	0	5.736	1
78	High	Master Protein	P20917	Myelin-associated glycoprotein [OS=Mus musculus]	0	95.158	28	13	51	13	627	69.3	5.1	135.03	13	cell adhesion;cell organization and biogenesis;stress response;developmental processes;other biological processes	plasma membrane;other membranes;other cell component	signal transduction activity or receptor binding;other molecular function	Pf08205, Pf13927	17136	ENSMUSG00000036634	Mag	A0A087WPR1; mmu:17136; P16880; P20917	Axonal growth inhibition (RHOA activation)	Spinal cord injury	2	0	5.727	1
79	High	Master Protein	Q06890	Clusterin [OS=Mus musculus]	0	56.964	25	11	29	11	448	51.6	5.67	60.2	11	cell cycle OR cell proliferation;cell organization and biogenesis;protein metabolism;other metabolic processes;stress response;transport;developmental processes;signal transduction;other biological processes	non-structural extracellular;other membranes;cytosol;cytoskeleton;mitochondrion;ER/Golgi;nucleus;other cell component	signal transduction activity or receptor binding;cytoskeletal activity;other molecular function	Pf01093	12759	ENSMUSG00000022037	Clu	mmu:12759; Q06890	Regulation of Complement cascade; Platelet degranulation ; Antimicrobial peptides; Terminal pathway of complement		4	0	5.556	1
80	High	Master Protein	Q923L3	CUB and sushi domain-containing protein 1 [OS=Mus musculus]	0	26.396	2	6	9	6	3564	387.6	6.1	10.01	6	developmental processes;other biological processes	other membranes		Pf00084, Pf00431	94109	ENSMUSG00000060924	Csmd1	E9QK23; mmu:94109; Q8BUV1; Q8BYQ3; Q923L3			0	0	5.52	1
81	High	Master Protein	Q6P9K9	Neurexin-3 [OS=Mus musculus]	0	196.949	28	33	79	27	1571	173.3	6.14	206.27	33	cell adhesion;cell-cell signaling;cell organization and biogenesis;transport;developmental processes;other biological processes	plasma membrane;other membranes;other cell component	other molecular function	Pf00008, Pf02210	18191	ENSMUSG00000066392	Nrxn3	E9PW93; E9Q466; mmu:18191; Q6P9K9; Q8CCT8	Neurexins and neuroligins		1	2	5.499	1
82	High	Master Protein	Q8K406	Leucine-rich repeat LGI family member 3 [OS=Mus musculus]	0	27.257	16	8	13	8	548	61.8	8.16	24.19	8	transport;other biological processes	non-structural extracellular;ER/Golgi;other cell component		Pf03736, Pf13855	213469	ENSMUSG00000033595	Lgi3	mmu:213469; Q8K406	LGI-ADAM interactions		1	0	5.481	1
83	High	Master Protein	E9Q7X7	Neurexin-2 [OS=Mus musculus]	0	40.269	7	12	29	6	1710	184.8	5.9	51.67	12	cell adhesion;cell-cell signaling;cell organization and biogenesis;transport;developmental processes;signal transduction;other biological processes	plasma membrane;other membranes;other cell component	signal transduction activity or receptor binding;other molecular function	Pf02210		ENSMUSG00000033768	Nrxn2	E9Q7X7	Neurexins and neuroligins		1	0	5.469	1
84	High	Master Protein	P70232	Neural cell adhesion molecule L1-like protein [OS=Mus musculus]	0	56.22	13	10	14	10	1209	135	5.57	39.11	10	cell adhesion;cell organization and biogenesis;stress response;developmental processes;other biological processes	non-structural extracellular;plasma membrane;other membranes;other cell component	other molecular function	Pf00041, Pf07679, Pf13882, Pf13927	12661	ENSMUSG00000030077	Chl1	A2RRK1; mmu:12661; P70232; Q8BS24; Q8C6W0; Q8C823; Q8VBY7		Splicing factor NOVA regulated synaptic proteins	1	0	5.435	1
85	High	Master Protein	Q00493	Carboxypeptidase E [OS=Mus musculus]	0	26.854	12	4	9	4	476	53.2	5.19	17.09	4	cell-cell signaling;protein metabolism;other metabolic processes;transport;developmental processes;signal transduction;other biological processes	non-structural extracellular;plasma membrane;other membranes;ER/Golgi;other cell component	signal transduction activity or receptor binding;other molecular function	Pf00246, Pf13620	12876	ENSMUSG00000037852	Cpe	mmu:12876; Q00493; Q64439			0	0	5.394	1
86	High	Master Protein	Q9CPW0	Contactin-associated protein-like 2 [OS=Mus musculus]	0	193.157	31	31	94	31	1332	148.1	6.77	219.96	31	cell adhesion;cell-cell signaling;cell cycle OR cell proliferation;cell organization and biogenesis;other metabolic processes;stress response;developmental processes;signal transduction;other biological processes	plasma membrane;other membranes;ER/Golgi;other cytoplasmic organelle;other cell component	other molecular function	Pf00754, Pf02210	66797	ENSMUSG00000039419	Cntnap2	mmu:66797; Q6P2K4; Q6ZQ31; Q9CPW0			0	0	5.361	1
87	High	Master Protein	B0V2N1	Receptor-type tyrosine-protein phosphatase S [OS=Mus musculus]	0	164.798	19	25	62	21	1907	211.8	7.23	189.5	25	cell adhesion;cell-cell signaling;cell organization and biogenesis;protein metabolism;other metabolic processes;developmental processes;other biological processes	plasma membrane;other membranes;cytosol;ER/Golgi;other cell component	other molecular function	Pf00041, Pf00102, Pf07679	19280	ENSMUSG00000013236	Ptprs	B0V2N1; mmu:19280; Q3TEC3; Q3TXC9; Q4JFC7; Q5XJV4; Q64503; Q64699; Q7TT17	Receptor-type tyrosine-protein phosphatases; Synaptic adhesion-like molecules	Mechanisms associated with pluripotency	3	0	5.311	1
88	High	Master Protein	P70206	Plexin-A1 [OS=Mus musculus]	0	76.212	12	18	32	10	1894	211	6.9	64.5	18	cell organization and biogenesis;developmental processes;signal transduction;other biological processes	plasma membrane;other membranes;cytosol;nucleus;other cell component	other molecular function	Pf01403, Pf01437, Pf01833, Pf08337, Pf17960, Pf18020, Pf20170	18844	ENSMUSG00000030084	Plxna1	B2RQP7; mmu:18844; P70206; Q5DTR0	RND1 GTPase cycle; CRMPs in Sema3A signaling; RHOD GTPase cycle; Sema3A PAK dependent Axon repulsion; SEMA3A-Plexin repulsion signaling by inhibiting Integrin adhesion; Other semaphorin interactions		6	0	5.194	1
89	High	Master Protein	P35438	Glutamate receptor ionotropic, NMDA 1 [OS=Mus musculus]	0	43.793	10	10	19	10	938	105.4	8.84	39.73	10	cell-cell signaling;cell organization and biogenesis;RNA metabolism OR transcription;other metabolic processes;transport;developmental processes;signal transduction;other biological processes	non-structural extracellular;plasma membrane;other membranes;ER/Golgi;other cell component	signal transduction activity or receptor binding;transporter activity;other molecular function	Pf00060, Pf01094, Pf10562, Pf10613	14810	ENSMUSG00000026959	Grin1	A2AI15; A2AI18; mmu:14810; P35438; Q8CFS4	EPHB-mediated forward signaling; RAF/MAP kinase cascade; Synaptic adhesion-like molecules; Assembly and cell surface presentation of NMDA receptors; Unblocking of NMDA receptors, glutamate binding and activation	Splicing factor NOVA regulated synaptic proteins; Alzheimer's disease; Spinal cord injury	8	0	5.181	1
90	High	Master Protein	Q80TS3	Adhesion G protein-coupled receptor L3 [OS=Mus musculus]	0	111.537	18	21	42	21	1537	171	6.71	102.06	21	cell adhesion;cell organization and biogenesis;developmental processes;signal transduction;other biological processes	plasma membrane;other membranes;other cell component	other molecular function	Pf00002, Pf01825, Pf02140, Pf02191, Pf02354, Pf16489	319387	ENSMUSG00000037605	Adgrl3	mmu:319387; Q3UHI7; Q3UM79; Q504Z9; Q5HZJ6; Q80T56; Q80TS3		GPCRs, non-odorant ; GPCRs, class B secretin-like	2	0	5.111	1
91	High	Master Protein	Q0VBD0	Integrin beta-8 [OS=Mus musculus]	0	30.148	10	7	10	7	767	84.5	7.09	21.87	7	cell adhesion;other metabolic processes;developmental processes;signal transduction;other biological processes	plasma membrane;other membranes;other cell component	signal transduction activity or receptor binding;other molecular function	Pf00362, Pf07974, Pf17205	320910	ENSMUSG00000025321	Itgb8	mmu:320910; Q0VBD0	TGF-beta receptor signaling activates SMADs; Integrin cell surface interactions; Molecules associated with elastic fibres	Focal adhesion: PI3K-Akt-mTOR signaling pathway; Integrin-mediated cell adhesion; Focal adhesion	6	0	5.03	1
92	High	Master Protein	P56564	Excitatory amino acid transporter 1 [OS=Mus musculus]	0	114.504	25	10	41	10	543	59.6	8.4	149.69	10	other metabolic processes;stress response;transport;developmental processes;other biological processes	plasma membrane;other membranes;mitochondrion;other cell component	transporter activity;other molecular function	Pf00375	20512	ENSMUSG00000005360	Slc1a3	mmu:20512; P56564; Q99P53	Glutamate Neurotransmitter Release Cycle; Transport of inorganic cations/anions and amino acids/oligopeptides; Astrocytic Glutamate-Glutamine Uptake And Metabolism		3	0	4.973	1
93	High	Master Protein	P70207	Plexin-A2 [OS=Mus musculus]	0	110.359	14	26	54	13	1894	211.4	6.54	90.69	26	cell organization and biogenesis;developmental processes;signal transduction;other biological processes	plasma membrane;other membranes;other cell component	other molecular function	Pf01403, Pf01437, Pf01833, Pf08337, Pf17960, Pf18020, Pf20170	18845	ENSMUSG00000026640	Plxna2	mmu:18845; P70207; Q6NVE6; Q6PHN4; Q80TZ7; Q8R1I4	Sema3A PAK dependent Axon repulsion; CRMPs in Sema3A signaling; SEMA3A-Plexin repulsion signaling by inhibiting Integrin adhesion	Spinal cord injury	4	14	4.96	1
94	High	Master Protein	P43006	Excitatory amino acid transporter 2 [OS=Mus musculus]	0	169.898	29	15	163	15	572	62	6.68	426.9	15	cell organization and biogenesis;other metabolic processes;stress response;transport;developmental processes;other biological processes	plasma membrane;other membranes;other cell component	transporter activity;other molecular function	Pf00375	20511	ENSMUSG00000005089	Slc1a2	mmu:20511; O35877; O54686; O54687; P43006	Glutamate Neurotransmitter Release Cycle; Transport of inorganic cations/anions and amino acids/oligopeptides; Astrocytic Glutamate-Glutamine Uptake And Metabolism	Oxidative stress and redox pathway	4	0	4.956	1
95	High	Master Protein	Q9R1V6	Disintegrin and metalloproteinase domain-containing protein 22 [OS=Mus musculus]	0	82.821	21	13	21	13	904	99.7	7.83	48.05	13	protein metabolism;developmental processes;other biological processes	plasma membrane;other membranes;other cell component	other molecular function	Pf00200, Pf01421, Pf01562, Pf07974, Pf08516	11496	ENSMUSG00000040537	Adam22	mmu:11496; Q5TLI8; Q5TLI9; Q5TLJ0; Q5TLJ1; Q5TLJ2; Q5TLJ3; Q5TLJ4; Q5TLJ5; Q5TLJ6; Q5TLJ7; Q5TLJ8; Q5TLJ9; Q5TLK0; Q5TLK1; Q5TLK2; Q5TLK3; Q5TLK4; Q5TLK5; Q5TLK6; Q5TLK7; Q5TLK8; Q8BSF2; Q9R1V5; Q9R1V6	LGI-ADAM interactions		1	0	4.891	1
96	High	Master Protein	P97798	Neogenin [OS=Mus musculus]	0	64.891	11	12	20	12	1492	162.8	6.49	53.27	12	cell adhesion;cell organization and biogenesis;transport;developmental processes;other biological processes	plasma membrane;other membranes;ER/Golgi;nucleus;other cell component	signal transduction activity or receptor binding;other molecular function	Pf00041, Pf06583, Pf07679, Pf13895	18007	ENSMUSG00000032340	Neo1	P97798		Splicing factor NOVA regulated synaptic proteins	1	0	4.836	1
97	High	Master Protein	Q61885	Myelin-oligodendrocyte glycoprotein [OS=Mus musculus]	0	73.893	35	13	81	13	246	28.3	7.96	205.31	13	cell adhesion;signal transduction;other biological processes	plasma membrane;other membranes;other cell component	signal transduction activity or receptor binding	Pf07686	17441		Mog	mmu:17441; P70364; Q61885; Q62003			0	0	4.832	1
98	High	Master Protein	Q6PHS9	Voltage-dependent calcium channel subunit alpha-2/delta-2 [OS=Mus musculus]	0	77.119	16	15	31	15	1154	130.3	5.66	72.13	15	cell organization and biogenesis;transport;other biological processes	plasma membrane;other membranes	transporter activity;other molecular function	Pf00092, Pf08399, Pf08473	56808	ENSMUSG00000010066	Cacna2d2	B2RY16; mmu:56808; Q3TPT9; Q3TSS6; Q6PHS9; Q6REE3; Q8C8R8; Q8CHE9; Q920H5; Q920H6; Q9EQG2; Q9R142	Regulation of insulin secretion; Presynaptic depolarization and calcium channel opening; Phase 0 - rapid depolarisation; Phase 2 - plateau phase		4	0	4.816	1
99	High	Master Protein	Q5DTY9	BTB/POZ domain-containing protein KCTD16 [OS=Mus musculus]	0	17.616	12	5	7	4	427	48.9	8.19	14.2	5	cell organization and biogenesis;other biological processes	plasma membrane;other membranes;other cell component		Pf02214	383348	ENSMUSG00000051401	Kctd16	mmu:383348; Q5DTY9; Q78Y50			0	1	4.802	1
100	High	Master Protein	B0F2B4	Neuroligin 4-like [OS=Mus musculus]	0	29.292	8	5	9	4	945	97.3	6.32	23.81	5	cell adhesion;cell-cell signaling;cell organization and biogenesis;transport;developmental processes;other biological processes	plasma membrane;other membranes;other cell component	signal transduction activity or receptor binding;other molecular function	Pf00135			Nlgn4l	A7LAI9; B0F2B4; B1P942			0	0	4.801	1
101	High	Master Protein	Q9Z1L5	Voltage-dependent calcium channel subunit alpha-2/delta-3 [OS=Mus musculus]	0	82.265	20	17	32	17	1091	122.7	5.73	83.42	17	transport;other biological processes	plasma membrane;other membranes	transporter activity;other molecular function	Pf08399, Pf08473, Pf13768	12294	ENSMUSG00000021991	Cacna2d3	mmu:12294; Q9Z1L5	Presynaptic depolarization and calcium channel opening		1	0	4.769	1
102	High	Master Protein	Q80ZF8	Adhesion G protein-coupled receptor B3 [OS=Mus musculus]	0	21.446	4	5	8	4	1522	171.2	7.02	12.3	5	cell organization and biogenesis;developmental processes;signal transduction;other biological processes	non-structural extracellular;plasma membrane;other membranes;other cell component	enzyme regulator activity;other molecular function	Pf00002, Pf00090, Pf01825, Pf02793, Pf16489, Pf19188	210933	ENSMUSG00000033569	Adgrb3	G3XA05; mmu:210933; Q80ZF8		GPCRs, non-odorant	1	1	4.708	1
103	High	Master Protein	A2ASQ1	Agrin [OS=Mus musculus]	0	47.04	7	8	13	8	1950	207.4	6.32	31.55	8	cell-cell signaling;cell organization and biogenesis;other metabolic processes;transport;developmental processes;other biological processes	non-structural extracellular;extracellular matrix;plasma membrane;other membranes;ER/Golgi;other cell component	other molecular function	Pf00008, Pf00050, Pf00053, Pf00054, Pf01390, Pf07648		ENSMUSG00000041936	Agrn	A2ASP9; A2ASQ0; A2ASQ1; B2RWU1	ECM proteoglycans; Retinoid metabolism and transport; A tetrasaccharide linker sequence is required for GAG synthesis; HS-GAG biosynthesis; HS-GAG degradation	Primary focal segmental glomerulosclerosis (FSGS)	6	0	4.697	1
104	High	Master Protein	P12960	Contactin-1 [OS=Mus musculus]	0	547.157	53	50	393	50	1020	113.3	6.16	1052.83	50	cell adhesion;cell organization and biogenesis;other metabolic processes;developmental processes;signal transduction;other biological processes	plasma membrane;other membranes;other cell component	other molecular function	Pf00041, Pf00047, Pf07679, Pf13927	12805	ENSMUSG00000055022	Cntn1	mmu:12805; P12960; Q6NXV7; Q8BR42; Q8C6A0		Delta-Notch signaling pathway	1	0	4.657	1
105	High	Master Protein	P70663	SPARC-like protein 1 [OS=Mus musculus]	0	15.602	14	5	9	5	650	72.2	4.6	9.68	5	cell adhesion;cell organization and biogenesis;signal transduction;other biological processes	non-structural extracellular;extracellular matrix;other cell component	other molecular function	Pf07648, Pf09289, Pf10591	13602	ENSMUSG00000029309	Sparcl1	E9QPH2; mmu:13602; P70663; P97810; Q99L82	Regulation of Insulin-like Growth Factor (IGF) transport and uptake by Insulin-like Growth Factor Binding Proteins (IGFBPs); Post-translational protein phosphorylation		2	0	4.639	1
106	High	Master Protein	Q64444	Carbonic anhydrase 4 [OS=Mus musculus]	0	21.902	19	5	7	5	305	34.3	8.21	17.17	5	transport;other biological processes	non-structural extracellular;plasma membrane;other membranes;cytosol;ER/Golgi;other cell component	other molecular function	Pf00194	12351	ENSMUSG00000000805	Ca4	mmu:12351; Q64444	Erythrocytes take up carbon dioxide and release oxygen; Erythrocytes take up oxygen and release carbon dioxide; Reversible hydration of carbon dioxide		3	0	4.631	1
107	High	Master Protein	P12023	Amyloid-beta precursor protein [OS=Mus musculus]	0	77.257	14	12	36	10	770	86.7	4.79	75.33	12	cell adhesion;cell cycle OR cell proliferation;cell organization and biogenesis;protein metabolism;RNA metabolism OR transcription;other metabolic processes;stress response;transport;developmental processes;signal transduction;other biological processes	non-structural extracellular;plasma membrane;other membranes;cytoskeleton;mitochondrion;ER/Golgi;nucleus;other cytoplasmic organelle;other cell component	signal transduction activity or receptor binding;enzyme regulator activity;nucleic acid binding activity;other molecular function	Pf00014, Pf02177, Pf03494, Pf10515, Pf12924, Pf12925	11820	ENSMUSG00000022892	App	mmu:11820; P12023; P97487; P97942; Q99K32	Insertion of tail-anchored proteins into the endoplasmic reticulum membrane; TAK1-dependent IKK and NF-kappa-B activation ; Platelet degranulation ; ECM proteoglycans; G alpha (q) signalling events; Regulation of Insulin-like Growth Factor (IGF) transport and uptake by Insulin-like Growth Factor Binding Proteins (IGFBPs); Post-translational protein phosphorylation; G alpha (i) signalling events; …	Alzheimer's disease; Delta-Notch signaling pathway	14	3	4.486	1
108	High	Master Protein	P21836	Acetylcholinesterase [OS=Mus musculus]	0	44.796	20	11	22	11	614	68.1	6.33	47.23	11	cell adhesion;cell-cell signaling;cell organization and biogenesis;other metabolic processes;transport;developmental processes;signal transduction;other biological processes	non-structural extracellular;extracellular matrix;plasma membrane;other membranes;ER/Golgi;nucleus;other cell component	other molecular function	Pf00135, Pf08674	11423	ENSMUSG00000023328	Ache	mmu:11423; P21836		Acetylcholine synthesis; Biogenic amine synthesis	2	0	4.478	1
109	High	Master Protein	O88343	Electrogenic sodium bicarbonate cotransporter 1 [OS=Mus musculus]	0	40.876	8	7	14	7	1079	121.4	6.84	20.24	7	transport;other biological processes	plasma membrane;other membranes;other cell component	transporter activity;other molecular function	Pf00955, Pf07565	54403	ENSMUSG00000060961	Slc4a4	mmu:54403; O88343; Q3USE4; Q8BUG0; Q8QZR9; Q9R1C4	Bicarbonate transporters		1	0	4.473	1
110	High	Master Protein	Q68ED2	Metabotropic glutamate receptor 7 [OS=Mus musculus]	0	30.762	11	6	10	5	915	102.2	7.88	32.98	6	cell-cell signaling;cell organization and biogenesis;other metabolic processes;stress response;transport;developmental processes;signal transduction;other biological processes	plasma membrane;other membranes;ER/Golgi;other cell component	transporter activity;enzyme regulator activity;other molecular function	Pf00003, Pf01094, Pf07562	108073	ENSMUSG00000056755	Grm7	mmu:108073; Q68ED2	G alpha (i) signalling events; Class C/3 (Metabotropic glutamate/pheromone receptors)	GPCRs, non-odorant ; GPCRs, class C metabotropic glutamate, pheromone	4	0	4.465	1
111	High	Master Protein	P43406	Integrin alpha-V [OS=Mus musculus]	0	46.562	13	12	21	12	1044	115.3	5.63	44.21	12	cell adhesion;cell organization and biogenesis;other metabolic processes;stress response;transport;developmental processes;signal transduction;other biological processes	plasma membrane;other membranes;cytosol;other cell component	signal transduction activity or receptor binding;transporter activity;other molecular function	Pf00357, Pf01839, Pf08441	16410	ENSMUSG00000027087	Itgav	A2AKI6; mmu:16410; P43406	Neutrophil degranulation; ECM proteoglycans; Syndecan interactions; TGF-beta receptor signaling activates SMADs; Integrin cell surface interactions; Molecules associated with elastic fibres; Signal transduction by L1; VEGFA-VEGFR2 Pathway; PECAM1 interactions; Cross-presentation of particulate exogenous antigens (phagosomes)	Primary focal segmental glomerulosclerosis (FSGS); Integrin-mediated cell adhesion	13	0	4.398	1
112	High	Master Protein	Q80YX1	Tenascin [OS=Mus musculus]	0	32.114	4	8	12	8	2110	231.7	4.89	18.76	8	cell adhesion;cell-cell signaling;cell organization and biogenesis;stress response;developmental processes;other biological processes	non-structural extracellular;extracellular matrix	other molecular function	Pf00041, Pf00147, Pf07974, Pf18720	21923	ENSMUSG00000028364	Tnc	mmu:21923; Q64706; Q80YX1; Q80YX2	Integrin cell surface interactions; Regulation of Insulin-like Growth Factor (IGF) transport and uptake by Insulin-like Growth Factor Binding Proteins (IGFBPs); Post-translational protein phosphorylation; ECM proteoglycans	Focal adhesion: PI3K-Akt-mTOR signaling pathway; Focal adhesion	6	0	4.257	1
113	High	Master Protein	P02468	Laminin subunit gamma-1 [OS=Mus musculus]	0	54.744	7	8	18	8	1607	177.2	5.21	43.15	8	cell adhesion;cell cycle OR cell proliferation;cell organization and biogenesis;other metabolic processes;developmental processes;other biological processes	non-structural extracellular;extracellular matrix;other cell component	extracellular structural activity;other molecular function	Pf00052, Pf00053, Pf00055			Lamc1	P02468			0	0	4.137	1
114	High	Master Protein	Q61361	Brevican core protein [OS=Mus musculus]	0	168.205	34	26	124	26	883	95.8	4.93	330.17	26	cell adhesion;cell organization and biogenesis;developmental processes;other biological processes	non-structural extracellular;extracellular matrix;other cell component	other molecular function	Pf00008, Pf00059, Pf00084, Pf00193, Pf07686	12032	ENSMUSG00000004892	Bcan	mmu:12032; Q61361; Q80WT7	Degradation of the extracellular matrix; ECM proteoglycans; A tetrasaccharide linker sequence is required for GAG synthesis; Chondroitin sulfate biosynthesis; CS/DS degradation; Dermatan sulfate biosynthesis	Spinal cord injury	7	0	4.099	1
115	High	Master Protein	Q9Z0X1	Apoptosis-inducing factor 1, mitochondrial [OS=Mus musculus]	0	16.531	8	4	9	4	612	66.7	9.17	8.31	4	cell organization and biogenesis;other metabolic processes;stress response;transport;developmental processes;signal transduction;other biological processes	other membranes;cytosol;mitochondrion;nucleus;other cell component	nucleic acid binding activity;other molecular function	Pf07992, Pf14721	26926	ENSMUSG00000036932	Aifm1	mmu:26926; Q1L6K5; Q9Z0X1		Apoptosis modulation by HSP70	1	0	3.999	1
116	High	Master Protein	Q62059	Versican core protein [OS=Mus musculus]	0	131.054	6	18	83	18	3357	366.6	4.64	204.9	18	cell adhesion;developmental processes;other biological processes	non-structural extracellular;extracellular matrix;other cell component	other molecular function	Pf00008, Pf00059, Pf00084, Pf00193, Pf07686			Vcan	Q62058; Q62059; Q9CUU0	Regulation of Insulin-like Growth Factor (IGF) transport and uptake by Insulin-like Growth Factor Binding Proteins (IGFBPs); Post-translational protein phosphorylation; ECM proteoglycans; A tetrasaccharide linker sequence is required for GAG synthesis; Chondroitin sulfate biosynthesis; CS/DS degradation; Dermatan sulfate biosynthesis		7	0	3.97	1
117	High	Master Protein	O54991	Contactin-associated protein 1 [OS=Mus musculus]	0	239.054	31	37	122	37	1385	156.2	7.06	316.41	37	cell adhesion;cell organization and biogenesis;developmental processes;other biological processes	plasma membrane;other membranes;other cell component	other molecular function	Pf00754, Pf02210	53321	ENSMUSG00000017167	Cntnap1	A2A4K6; mmu:53321; O54991			0	0	3.931	1
118	High	Master Protein	Q810B7	SLIT and NTRK-like protein 5 [OS=Mus musculus]	0	17.298	5	4	9	4	957	107.1	6.93	16.86	4	cell-cell signaling;cell organization and biogenesis;developmental processes;other biological processes	other membranes;other cell component		Pf13855	75409	ENSMUSG00000033214	Slitrk5	mmu:75409; Q810B7; Q9CT21	Receptor-type tyrosine-protein phosphatases; RAC2 GTPase cycle; RAC3 GTPase cycle		3	0	3.91	1
119	High	Master Protein	Q6PFE7	Tomoregulin-1 [OS=Mus musculus]	0	30.621	17	5	11	5	372	40.1	6.81	32.63	5		plasma membrane;other membranes		Pf07648	230157	ENSMUSG00000028347	Tmeff1	A2AJN3; mmu:230157; Q6PFE7; Q8BRP7; Q8C536; Q9JJS1			0	0	3.907	1
120	High	Master Protein	Q8CJH3	Plexin-B1 [OS=Mus musculus]	0	100.78	12	20	34	19	2119	231.2	5.55	83.65	20	cell organization and biogenesis;developmental processes;signal transduction;other biological processes	plasma membrane;other membranes;other cell component	other molecular function	Pf01403, Pf01437, Pf01833, Pf08337, Pf17960, Pf18020, Pf20170	235611	ENSMUSG00000053646	Plxnb1	E9QKS4; mmu:235611; Q6ZQC3; Q80ZZ1; Q8CJH3	G alpha (12/13) signalling events; RHOD GTPase cycle; Sema4D mediated inhibition of cell attachment and migration; Sema4D induced cell migration and growth-cone collapse		4	1	3.894	1
121	High	Master Protein	Q6V4S5	Protein sidekick-2 [OS=Mus musculus]	0	31.312	5	9	10	9	2176	239.8	7.36	19.36	9	cell adhesion;cell organization and biogenesis;developmental processes	plasma membrane;other membranes;other cell component		Pf00041, Pf07679, Pf13927	237979	ENSMUSG00000041592	Sdk2	mmu:237979; Q3TTK1; Q5U5W7; Q6V4S5; Q6ZPP2	SDK interactions		1	0	3.891	1
122	High	Master Protein	Q9Z1T2	Thrombospondin-4 [OS=Mus musculus]	0	21.523	7	5	8	5	963	106.3	4.67	18.87	5	cell adhesion;cell organization and biogenesis;stress response;developmental processes;signal transduction;other biological processes	non-structural extracellular;extracellular matrix;cytosol;ER/Golgi;other cell component	signal transduction activity or receptor binding;other molecular function	Pf02412, Pf05735, Pf07645, Pf11598	21828	ENSMUSG00000021702	Thbs4	mmu:21828; Q9QYS3; Q9WUE0; Q9Z1T2	Signaling by PDGF	Focal adhesion: PI3K-Akt-mTOR signaling pathway; Focal adhesion	3	0	3.807	1
123	High	Master Protein	P10852	4F2 cell-surface antigen heavy chain [OS=Mus musculus]	0	55.174	24	10	23	10	526	58.3	5.91	68.9	10	other metabolic processes;transport;other biological processes	plasma membrane;other membranes;nucleus;other cytoplasmic organelle;other cell component	transporter activity;nucleic acid binding activity	Pf00128, Pf16028	17254	ENSMUSG00000010095	Slc3a2	G3UWA6; mmu:17254; P10852; Q54AH5	Amino acid transport across the plasma membrane; Tryptophan catabolism		2	0	3.767	1
124	High	Master Protein	Q9QUP5	Hyaluronan and proteoglycan link protein 1 [OS=Mus musculus]	0	106.79	52	16	79	15	356	40.5	7.8	198.93	16	cell adhesion;developmental processes;other biological processes	non-structural extracellular;extracellular matrix;other cell component	other molecular function	Pf00193, Pf07686	12950	ENSMUSG00000021613	Hapln1	mmu:12950; Q9D1G9; Q9QUP5; Q9Z1X7	ECM proteoglycans		1	1	3.758	1
125	High	Master Protein	P04925	Major prion protein [OS=Mus musculus]	0	51.464	21	6	41	6	254	28	9.33	68.78	6	cell organization and biogenesis;other metabolic processes;stress response;signal transduction;other biological processes	plasma membrane;other membranes;cytosol;mitochondrion;ER/Golgi;nucleus;other cell component	signal transduction activity or receptor binding;enzyme regulator activity;cytoskeletal activity;other molecular function	Pf00377, Pf11587	19122	ENSMUSG00000079037	Prnp	mmu:19122; P04925	Insertion of tail-anchored proteins into the endoplasmic reticulum membrane		1	0	3.613	1
126	High	Master Protein	Q8JZP2	Synapsin-3 [OS=Mus musculus]	0	26.409	16	6	10	4	579	63.3	9.38	15.19	6	cell-cell signaling;transport	other membranes;ER/Golgi;other cell component	other molecular function	Pf02078, Pf02750, Pf10581	27204	ENSMUSG00000059602	Syn3	E9QNQ6; mmu:27204; Q8JZP2	Dopamine Neurotransmitter Release Cycle; Serotonin Neurotransmitter Release Cycle		2	0	3.55	1
127	High	Master Protein	P62830	60S ribosomal protein L23 [OS=Mus musculus]	0	11.873	34	4	11	4	140	14.9	10.51	3.61	4	cell cycle OR cell proliferation;cell organization and biogenesis;protein metabolism;other metabolic processes;other biological processes	cytosol;translational apparatus;nucleus;other cell component	enzyme regulator activity;nucleic acid binding activity;other molecular function	Pf00238	65019	ENSMUSG00000071415	Rpl23	mmu:65019; P23131; P24048; P62830; Q29246; Q3THU4; Q9CZE6; Q9DCQ4	L13a-mediated translational silencing of Ceruloplasmin expression; SRP-dependent cotranslational protein targeting to membrane; Major pathway of rRNA processing in the nucleolus and cytosol; Formation of a pool of free 40S subunits; GTP hydrolysis and joining of the 60S ribosomal subunit; Nonsense Mediated Decay (NMD) independent of the Exon Junction Complex (EJC); Nonsense Mediated Decay (NMD) e…		7	0	3.416	1
128	High	Master Protein	Q61327	Sodium-dependent dopamine transporter [OS=Mus musculus]	0	16.635	6	4	11	4	619	68.8	7.21	17.6	4	cell-cell signaling;other metabolic processes;transport;developmental processes;other biological processes	plasma membrane;other membranes;other cell component	signal transduction activity or receptor binding;transporter activity;other molecular function	Pf00209	13162	ENSMUSG00000021609	Slc6a3	mmu:13162; Q60719; Q61327; Q9R1I2	Na+/Cl- dependent neurotransmitter transporters; Dopamine clearance from the synaptic cleft	Dopaminergic neurogenesis; Parkinson's disease	4	0	3.385	1
129	High	Master Protein	B2RXS4	Plexin-B2 [OS=Mus musculus]	0	25.786	4	6	15	4	1842	206.1	5.87	25.14	6	cell adhesion;cell cycle OR cell proliferation;cell organization and biogenesis;developmental processes;signal transduction;other biological processes	plasma membrane;other membranes;other cell component	other molecular function	Pf01403, Pf01437, Pf01833, Pf08337, Pf17960, Pf20170	140570	ENSMUSG00000036606	Plxnb2	B2RXS4; mmu:140570; Q3UH76			0	0	3.331	1
130	High	Master Protein	Q9EPL2	Calsyntenin-1 [OS=Mus musculus]	0	24.565	7	8	15	8	979	108.8	4.92	14.75	8	cell adhesion;cell-cell signaling;transport;other biological processes	non-structural extracellular;plasma membrane;other membranes;ER/Golgi;nucleus;other cytoplasmic organelle;other cell component	cytoskeletal activity;other molecular function	Pf00028, Pf13385, Pf19699	65945	ENSMUSG00000039953	Clstn1	A2A800; B2KFP1; B2KFP2; mmu:65945; Q69ZV9; Q7TS67; Q8K103; Q9EPL2		Splicing factor NOVA regulated synaptic proteins	1	0	3.296	1
131	High	Master Protein	Q9Z1B3	1-phosphatidylinositol 4,5-bisphosphate phosphodiesterase beta-1 [OS=Mus musculus]	0	61.672	13	11	23	11	1216	138.3	6.13	64.79	11	cell adhesion;cell-cell signaling;cell cycle OR cell proliferation;RNA metabolism OR transcription;other metabolic processes;transport;developmental processes;signal transduction;other biological processes	plasma membrane;other membranes;cytosol;nucleus;other cell component	enzyme regulator activity;other molecular function	Pf00387, Pf00388, Pf06631, Pf08703, Pf09279, Pf17787	18795	ENSMUSG00000051177	Plcb1	mmu:18795; Q62075; Q6PDH1; Q8K5A5; Q8K5A6; Q9Z0E5; Q9Z1B3; Q9Z2T5	Ca2+ pathway; G alpha (q) signalling events; G beta:gamma signalling through PLC beta; Presynaptic function of Kainate receptors; Synthesis of IP3 and IP4 in the cytosol; PLC beta mediated events; Acetylcholine regulates insulin secretion; Fatty Acids bound to GPR40 (FFAR1) regulate insulin secretion	Alzheimer's disease; Chemokine signaling pathway; IL-2 signaling pathway	11	0	3.196	1
132	High	Master Protein	P10493	Nidogen-1 [OS=Mus musculus]	0	40.03	9	9	18	9	1245	136.5	5.44	33.93	9	cell adhesion;cell-cell signaling;cell organization and biogenesis;developmental processes;signal transduction;other biological processes	non-structural extracellular;extracellular matrix;other cell component	other molecular function	Pf00058, Pf00086, Pf06119, Pf07474, Pf07645, Pf12662, Pf12947, Pf14670	18073	ENSMUSG00000005397	Nid1	mmu:18073; P10493; Q3TKX9; Q8BQI3; Q8C3U8; Q8C9P6	Laminin interactions; Degradation of the extracellular matrix		2	0	3.072	1
133	High	Master Protein	Q9Z2H5	Band 4.1-like protein 1 [OS=Mus musculus]	0	40.101	10	8	19	7	879	98.3	5.62	46.72	8	cell organization and biogenesis	plasma membrane;other membranes;cytosol;cytoskeleton;other cell component	signal transduction activity or receptor binding;cytoskeletal activity;other molecular function	Pf00373, Pf04382, Pf05902, Pf08736, Pf09379, Pf09380	13821		Epb41l1	mmu:13821; Q3U3L1; Q3UHP7; Q80U34; Q8K204; Q9Z2H5	Trafficking of AMPA receptors; Neurexins and neuroligins	Splicing factor NOVA regulated synaptic proteins	3	0	3.058	1
134	High	Master Protein	Q7TPD3	Roundabout homolog 2 [OS=Mus musculus]	0	37.951	8	11	14	10	1470	161.1	6.33	32.36	11	cell adhesion;cell organization and biogenesis;developmental processes;other biological processes	plasma membrane;other membranes;other cell component	other molecular function	Pf00041, Pf07679, Pf13927			Robo2	Q7TPD3; Q8BJ59			0	1	3.036	1
135	High	Master Protein	Q91XM9	Disks large homolog 2 [OS=Mus musculus]	0	24.018	9	6	14	6	852	94.8	6.24	24.71	6	cell-cell signaling;cell organization and biogenesis;transport;developmental processes;other biological processes	plasma membrane;other membranes;ER/Golgi;other cell component	other molecular function	Pf00018, Pf00595, Pf00625, Pf10600, Pf10608	23859	ENSMUSG00000052572	Dlg2	F8VQM7; mmu:23859; Q8BXK7; Q8BYG5; Q91XM9	Neurexins and neuroligins; RAF/MAP kinase cascade; Unblocking of NMDA receptors, glutamate binding and activation	Wnt signaling pathway	4	0	3.017	1	fold change >3
136	High	Master Protein	Q9JI18	Low-density lipoprotein receptor-related protein 1B [OS=Mus musculus]	0	73.456	5	20	34	19	4599	513.3	5.39	43.28	20	transport;developmental processes	plasma membrane;other membranes;other cell component	signal transduction activity or receptor binding;other molecular function	Pf00008, Pf00057, Pf00058, Pf07645, Pf12662, Pf14670, Pf16472			Lrp1b	Q8BZD3; Q8BZM7; Q9JI18			0	0	2.998	1
137	High	Master Protein	Q8R127	Saccharopine dehydrogenase-like oxidoreductase [OS=Mus musculus]	0	12.662	11	4	5	4	429	47.1	8.6	2.31	4	other metabolic processes	other cell component	other molecular function	Pf03435, Pf16653	109232	ENSMUSG00000038936	Sccpdh	mmu:109232; Q3TMB9; Q8R127	Platelet degranulation		1	0	2.995	1
138	High	Master Protein	P80317	T-complex protein 1 subunit zeta [OS=Mus musculus]	0	10.508	9	5	8	5	531	58	7.08	10.82	5	transport;other biological processes	cytosol;cytoskeleton;other cell component	other molecular function	Pf00118	12466		Cct6a	mmu:12466; P80317	Cooperation of PDCL (PhLP1) and TRiC/CCT in G-protein beta folding; RHOBTB2 GTPase cycle; Association of TriC/CCT with target proteins during biosynthesis		3	0	2.982	1
139	High	Master Protein	Q8R555	Cartilage acidic protein 1 [OS=Mus musculus]	0	23.373	12	6	12	6	646	70.3	5.14	16.68	6	cell organization and biogenesis;developmental processes;other biological processes	non-structural extracellular;other cell component	other molecular function	Pf07593, Pf07645, Pf13517	72832	ENSMUSG00000042401	Crtac1	mmu:72832; Q3UF32; Q3UF40; Q8BMF1; Q8R3V8; Q8R555			0	0	2.953	1
140	High	Master Protein	Q3UHD1	Adhesion G protein-coupled receptor B1 [OS=Mus musculus]	0	10.772	2	4	9	4	1582	173.2	7.56	15.3	4	cell organization and biogenesis;stress response;transport;developmental processes;signal transduction;other biological processes	non-structural extracellular;plasma membrane;other membranes;other cell component	other molecular function	Pf00002, Pf00090, Pf01825, Pf02793, Pf16489, Pf19188	107831	ENSMUSG00000034730	Adgrb1	mmu:107831; Q3UH36; Q3UHD1; Q8CGM0		GPCRs, non-odorant	1	0	2.901	1
141	High	Master Protein	Q8BGH2	Sorting and assembly machinery component 50 homolog [OS=Mus musculus]	0	15.732	14	6	9	6	469	51.8	6.8	11.61	6	cell organization and biogenesis;transport	other membranes;mitochondrion		Pf01103	68653	ENSMUSG00000022437	Samm50	mmu:68653; Q3TIL3; Q3TTG7; Q3TWD3; Q8BGH2	RAC2 GTPase cycle		1	0	2.901	1
142	High	Master Protein	Q5M8N0	CB1 cannabinoid receptor-interacting protein 1 [OS=Mus musculus]	0	34.178	49	6	16	6	164	18.6	7.96	38.81	6	other biological processes	plasma membrane;other membranes;other cell component	signal transduction activity or receptor binding	Pf15043	380686	ENSMUSG00000044629	Cnrip1	mmu:380686; Q3TAC7; Q3UFR2; Q5M8N0			0	0	2.881	1
143	High	Master Protein	O35633	Vesicular inhibitory amino acid transporter [OS=Mus musculus]	0	29.698	15	7	15	7	525	57.3	6.64	29.55	7	transport;developmental processes	plasma membrane;other membranes;ER/Golgi;other cell component	transporter activity	Pf01490	22348	ENSMUSG00000037771	Slc32a1	mmu:22348; O35633	GABA synthesis, release, reuptake and degradation; Transport of inorganic cations/anions and amino acids/oligopeptides		2	0	2.869	1
144	High	Master Protein	Q99K48	Non-POU domain-containing octamer-binding protein [OS=Mus musculus]	0	27.691	12	6	20	6	473	54.5	8.95	46.36	6	DNA metabolism;RNA metabolism OR transcription;other metabolic processes;stress response;other biological processes	nucleus;other cell component	nucleic acid binding activity;other molecular function	Pf00076, Pf08075	53610	ENSMUSG00000031311	Nono	mmu:53610; Q63887; Q99K48; Q9CYQ4; Q9DBP2		mRNA processing	1	0	2.839	1
145	High	Master Protein	Q64332	Synapsin-2 [OS=Mus musculus]	0	154.798	36	16	89	12	586	63.3	8.43	259.92	16	cell-cell signaling;transport	plasma membrane;other membranes;ER/Golgi;other cell component	other molecular function	Pf02078, Pf02750, Pf10581	20965	ENSMUSG00000009394	Syn2	mmu:20965; Q64332; Q6NZR0; Q9QWV7	Dopamine Neurotransmitter Release Cycle; Serotonin Neurotransmitter Release Cycle		2	0	2.837	1
146	High	Master Protein	Q05920	Pyruvate carboxylase, mitochondrial [OS=Mus musculus]	0	38.243	8	9	16	9	1178	129.6	6.71	31.91	9	other metabolic processes;other biological processes	mitochondrion;other cell component	other molecular function	Pf00289, Pf00364, Pf00682, Pf02436, Pf02785, Pf02786			Pc	Q05920	Gluconeogenesis; Biotin transport and metabolism		2	0	2.834	1
147	High	Master Protein	Q80TJ1	Calcium-dependent secretion activator 1 [OS=Mus musculus]	0	19.048	5	4	8	4	1355	153	5.74	8.46	4	cell-cell signaling;cell organization and biogenesis;transport;other biological processes	other membranes;other cell component	other molecular function	Pf00169, Pf06292	27062	ENSMUSG00000054423	Cadps	E9QN90; mmu:27062; Q3TSP2; Q61374; Q6AXB4; Q6PGF0; Q80TJ1			0	0	2.829	1
148	High	Master Protein	P12970	60S ribosomal protein L7a [OS=Mus musculus]	0	44.763	38	10	20	10	266	30	10.56	23.67	10	protein metabolism;other metabolic processes;other biological processes	other membranes;cytosol;translational apparatus;nucleus;other cell component	other molecular function	Pf01248	27176	ENSMUSG00000062647	Rpl7a	mmu:27176; P12970; Q91YM3		Cytoplasmic ribosomal proteins	1	0	2.79	1
149	High	Master Protein	Q03157	Amyloid beta precursor like protein 1 [OS=Mus musculus]	0	31.749	13	6	9	6	654	72.8	5.67	18.22	6	cell adhesion;cell organization and biogenesis;RNA metabolism OR transcription;other metabolic processes;transport;developmental processes;other biological processes	plasma membrane;other membranes;ER/Golgi;nucleus;other cell component	signal transduction activity or receptor binding;other molecular function	Pf02177, Pf10515, Pf12924, Pf12925	11803	ENSMUSG00000006651	Aplp1	A0A0R4IZZ1; mmu:11803; Q03157; Q3U311; Q8VC38			0	0	2.785	1
150	High	Master Protein	Q61699	Heat shock protein 105 kDa [OS=Mus musculus]	0	31.635	14	9	15	7	858	96.3	5.53	28.21	9	stress response;other biological processes	non-structural extracellular;cytosol;nucleus;other cell component	cytoskeletal activity;other molecular function	Pf00012	15505	ENSMUSG00000029657	Hsph1	mmu:15505; Q3TNS2; Q3UIY8; Q61699; Q62578; Q62579; Q6A0A5; Q8C430; Q8VCW6	Regulation of HSF1-mediated heat shock response		1	0	2.783	1
151	High	Master Protein	Q8R4G0	Netrin-G1 [OS=Mus musculus]	0	22.638	12	4	7	4	539	60.5	6.24	24.11	4	cell adhesion;cell organization and biogenesis;developmental processes;other biological processes	plasma membrane;other membranes;other cell component	other molecular function	Pf00053, Pf00055	80883	ENSMUSG00000059857	Ntng1	mmu:80883; Q68FE5; Q69ZU3; Q8R4F3; Q8R4F4; Q8R4F5; Q8R4F6; Q8R4F7; Q8R4F8; Q8R4F9; Q8R4G0; Q9ESR3; Q9ESR4; Q9ESR5; Q9ESR6; Q9ESR7; Q9ESR8		Splicing factor NOVA regulated synaptic proteins	1	0	2.77	1
152	High	Master Protein	Q8CBE3	WD repeat-containing protein 37 [OS=Mus musculus]	0	22.852	13	6	10	6	496	55	7.23	20.42	6	developmental processes;other biological processes	nucleus;other cell component		Pf00400	207615	ENSMUSG00000021147	Wdr37	mmu:207615; Q80Y96; Q8CBE3; Q8CCL2			0	0	2.76	1
153	High	Master Protein	P20060	Beta-hexosaminidase subunit beta [OS=Mus musculus]	0	80.715	32	18	72	18	536	61.1	8.12	142.96	18	cell organization and biogenesis;protein metabolism;other metabolic processes;developmental processes;other biological processes	non-structural extracellular;other membranes;other cytoplasmic organelle;other cell component	other molecular function	Pf00728, Pf14845	15212	ENSMUSG00000021665	Hexb	mmu:15212; P20060	Neutrophil degranulation; Keratan sulfate degradation; Hyaluronan uptake and degradation; Glycosphingolipid metabolism; CS/DS degradation		5	0	2.748	1
154	High	Master Protein	Q925N0	Sideroflexin-5 [OS=Mus musculus]	0	9.306	13	4	9	4	342	37.3	9.44	12.86	4	transport;other biological processes	other membranes;mitochondrion	transporter activity	Pf03820	94282	ENSMUSG00000033720	Sfxn5	mmu:94282; Q8BGG3; Q925N0			0	0	2.746	1
155	High	Master Protein	B9EKR1	Receptor-type tyrosine-protein phosphatase zeta [OS=Mus musculus]	0	100.911	7	15	95	15	2312	254.2	4.88	202.26	15	cell organization and biogenesis;protein metabolism;other metabolic processes;developmental processes;other biological processes	non-structural extracellular;extracellular matrix;plasma membrane;other membranes;other cell component	signal transduction activity or receptor binding;other molecular function	Pf00041, Pf00102, Pf00194	19283	ENSMUSG00000068748	Ptprz1	B9EKR1; mmu:19283	Signaling by ALK; Other interleukin signaling	Spinal cord injury	3	0	2.744	1
156	High	Master Protein	Q8VIJ6	Splicing factor, proline- and glutamine-rich [OS=Mus musculus]	0	11.532	9	4	7	4	699	75.4	9.44	13.54	4	cell organization and biogenesis;DNA metabolism;RNA metabolism OR transcription;other metabolic processes;stress response;transport;other biological processes	nucleus;other cell component	nucleic acid binding activity;other molecular function	Pf00076, Pf08075	71514	ENSMUSG00000028820	Sfpq	A2A7U6; mmu:71514; Q8VIJ6; Q9ERW2	PTK6 Regulates Proteins Involved in RNA Processing	mRNA processing	2	0	2.742	1
157	High	Master Protein	P84309	Adenylate cyclase type 5 [OS=Mus musculus]	0	50.821	11	11	20	11	1262	139	7.06	40.88	11	other metabolic processes;signal transduction;other biological processes	plasma membrane;other membranes;other cytoplasmic organelle;other cell component	other molecular function	Pf00211, Pf06327, Pf16214	224129	ENSMUSG00000022840	Adcy5	mmu:224129; P84309; Q3TU67; Q3UH09; Q5BL06	Adenylate cyclase inhibitory pathway; Adrenaline,noradrenaline inhibits insulin secretion; Hedgehog 'off' state; G alpha (z) signalling events; PKA activation; Adenylate cyclase activating pathway	Purine metabolism; Chemokine signaling pathway; G protein signaling pathways; Myometrial relaxation and contraction pathways; Calcium regulation in cardiac cells	11	0	2.742	1
158	High	Master Protein	Q6ZWN5	40S ribosomal protein S9 [OS=Mus musculus]	0	12.268	21	5	8	5	194	22.6	10.65	9.74	5	protein metabolism;other metabolic processes;other biological processes	cytosol;translational apparatus;nucleus;other cell component	nucleic acid binding activity;other molecular function	Pf00163, Pf01479	76846	ENSMUSG00000006333	Rps9	mmu:76846; Q3UBF1; Q6ZWN5; Q8K2D1	L13a-mediated translational silencing of Ceruloplasmin expression; SRP-dependent cotranslational protein targeting to membrane; Major pathway of rRNA processing in the nucleolus and cytosol; Formation of a pool of free 40S subunits; GTP hydrolysis and joining of the 60S ribosomal subunit; Nonsense Mediated Decay (NMD) independent of the Exon Junction Complex (EJC); Nonsense Mediated Decay (NMD) e…	mRNA processing	11	0	2.735	1
159	High	Master Protein	Q9CS84	Neurexin-1 [OS=Mus musculus]	0	284.489	32	40	156	33	1514	166.1	6.09	404.37	40	cell adhesion;cell-cell signaling;cell organization and biogenesis;transport;developmental processes;signal transduction;other biological processes	plasma membrane;other membranes;ER/Golgi;nucleus;other cell component	signal transduction activity or receptor binding;other molecular function	Pf00008, Pf02210	18189	ENSMUSG00000024109	Nrxn1	G3UWZ9; O88722; Q80Y87; Q8CHE6; Q9CS84	Neurexins and neuroligins		1	6	2.727	1
160	High	Master Protein	O35098	Dihydropyrimidinase-related protein 4 [OS=Mus musculus]	0	46.728	25	9	11	8	572	61.9	6.98	26.34	9		cytosol	cytoskeletal activity;other molecular function	Pf01979			Dpysl4	O08886; O35098; Q3UL94	CRMPs in Sema3A signaling		1	0	2.725	1
161	High	Master Protein	P58281	Dynamin-like 120 kDa protein, mitochondrial [OS=Mus musculus]	0	15.571	5	4	6	4	960	111.3	7.55	0	4	cell organization and biogenesis;other metabolic processes;stress response;transport;developmental processes;other biological processes	other membranes;cytosol;cytoskeleton;mitochondrion;nucleus;other cell component	cytoskeletal activity;other molecular function	Pf00350, Pf19434	74143	ENSMUSG00000038084	Opa1	A6H6Q3; mmu:74143; P58281; Q3ULA5; Q8BKU7; Q8BLL3; Q8BM08; Q8R3J7	Regulation of Apoptosis		1	0	2.721	1
162	High	Master Protein	Q8K596	Sodium/calcium exchanger 2 [OS=Mus musculus]	0	52.833	16	10	23	10	921	100.6	5.12	40.98	10	cell organization and biogenesis;stress response;transport;other biological processes	plasma membrane;other membranes;cytoskeleton;mitochondrion;other cell component	transporter activity;other molecular function	Pf01699, Pf03160, Pf16494	110891	ENSMUSG00000030376	Slc8a2	mmu:110891; Q68EG0; Q8K596; Q8R504	Ion homeostasis; Reduction of cytosolic Ca++ levels; Sodium/Calcium exchangers		3	0	2.712	1
163	High	Master Protein	Q03265	ATP synthase subunit alpha, mitochondrial [OS=Mus musculus]	0	272.89	56	32	233	32	553	59.7	9.19	613.82	32	other metabolic processes;transport;other biological processes	plasma membrane;other membranes;mitochondrion;nucleus;other cell component	signal transduction activity or receptor binding;transporter activity;other molecular function	Pf00006, Pf00306, Pf02874	11946	ENSMUSG00000025428	Atp5f1a	mmu:11946; Q03265; Q3TFN0; Q3THN8; Q3TPR0; Q3TPV3; Q3TZU3; Q3UIR7; Q543Y6	Formation of ATP by chemiosmotic coupling; Cristae formation	Oxidative phosphorylation; Electron transport chain	4	0	2.7	1
164	High	Master Protein	Q01065	Dual specificity calcium/calmodulin-dependent 3',5'-cyclic nucleotide phosphodiesterase 1B [OS=Mus musculus]	0	54.052	29	12	31	11	535	61.2	5.72	55.48	12	other metabolic processes;signal transduction;other biological processes	cytosol;other cell component	other molecular function	Pf00233, Pf08499	18574	ENSMUSG00000022489	Pde1b	mmu:18574; O35384; Q01065	G alpha (s) signalling events; cGMP effects; Cam-PDE 1 activation	Purine metabolism; G protein signaling pathways	5	0	2.699	1
165	High	Master Protein	Q8BIZ1	Ankyrin repeat and sterile alpha motif domain-containing protein 1B [OS=Mus musculus]	0	15.858	5	5	6	5	1259	139	6.29	2.66	5	cell-cell signaling;signal transduction;other biological processes	plasma membrane;other membranes;cytosol;cytoskeleton;nucleus;other cell component	signal transduction activity or receptor binding	Pf00536, Pf00640, Pf12796	77531		Anks1b	E9Q644; mmu:77531; Q4KMR9; Q8BIZ1; Q8BJ47; Q8BJ49			0	0	2.686	1
166	High	Master Protein	O54983	Ketimine reductase mu-crystallin [OS=Mus musculus]	0	39.672	24	7	21	7	313	33.5	5.67	44.36	7	RNA metabolism OR transcription;other metabolic processes;transport;other biological processes	cytosol;mitochondrion;nucleus;other cell component	other molecular function	Pf02423	12971	ENSMUSG00000030905	Crym	mmu:12971; O54983	Lysine catabolism		1	0	2.677	1
167	High	Master Protein	Q8CA95	cAMP and cAMP-inhibited cGMP 3',5'-cyclic phosphodiesterase 10A [OS=Mus musculus]	0	109.955	33	18	47	18	790	89.4	6.6	132.83	18	other metabolic processes;signal transduction;other biological processes	other membranes;cytosol;other cell component	other molecular function	Pf00233, Pf01590	23984	ENSMUSG00000023868	Pde10a	mmu:23984; Q3TLU6; Q3TRG6; Q69C21; Q8CA95; Q9WVI1	G alpha (s) signalling events; cGMP effects	Purine metabolism	3	0	2.675	1
168	High	Master Protein	Q9QYB8	Beta-adducin [OS=Mus musculus]	0	36.522	21	10	16	9	725	80.6	6.21	25.92	10	cell adhesion;cell organization and biogenesis;transport;developmental processes;other biological processes	plasma membrane;other membranes;cytoskeleton;other cell component	cytoskeletal activity;other molecular function	Pf00596	11519	ENSMUSG00000030000	Add2	mmu:11519; Q3U0E1; Q80VH9; Q8C1C4; Q9CXE3; Q9JLE4; Q9JLE5; Q9QYB7; Q9QYB8	Miscellaneous transport and binding events		1	1	2.654	1
169	High	Master Protein	Q9JHI5	Isovaleryl-CoA dehydrogenase, mitochondrial [OS=Mus musculus]	0	11.77	10	4	6	4	424	46.3	8.29	4.25	4	other metabolic processes	other membranes;mitochondrion;nucleus	other molecular function	Pf00441, Pf02770, Pf02771	56357	ENSMUSG00000027332	Ivd	mmu:56357; Q9CYI3; Q9DBD7; Q9JHI5	Branched-chain amino acid catabolism		1	0	2.649	1
170	High	Master Protein	P31324	cAMP-dependent protein kinase type II-beta regulatory subunit [OS=Mus musculus]	0	63.091	36	11	24	11	416	46.1	4.98	65.01	11	other metabolic processes;other biological processes	plasma membrane;other membranes;cytosol;cytoskeleton;other cell component	enzyme regulator activity;other molecular function	Pf00027, Pf02197	19088	ENSMUSG00000002997	Prkar2b	B1B199; mmu:19088; P31324; Q3UTZ1; Q80ZM4; Q8BRZ7	Anchoring of the basal body to the plasma membrane; Factors involved in megakaryocyte development and platelet production; Regulation of PLK1 Activity at G2/M Transition; Loss of Nlp from mitotic centrosomes; Recruitment of mitotic centrosome proteins and complexes; Recruitment of NuMA to mitotic centrosomes; AURKA Activation by TPX2; Hedgehog 'off' state; DARPP-32 events; Vasopressin regulates r…	G protein signaling pathways; Myometrial relaxation and contraction pathways; Calcium regulation in cardiac cells	18	0	2.646	1
171	High	Master Protein	Q8BZ98	Dynamin-3 [OS=Mus musculus]	0	67.408	18	17	47	6	863	97.1	8.35	74.13	17	cell organization and biogenesis;transport;developmental processes;other biological processes	non-structural extracellular;plasma membrane;other membranes;cytoskeleton;ER/Golgi;other cell component	signal transduction activity or receptor binding;cytoskeletal activity;other molecular function	Pf00169, Pf00350, Pf01031, Pf02212	103967	ENSMUSG00000040265	Dnm3	B2RUH0; mmu:103967; Q3UGY9; Q80TR2; Q8BWW6; Q8BZ98	MHC class II antigen presentation; Recycling pathway of L1; Clathrin-mediated endocytosis; Toll Like Receptor 4 (TLR4) Cascade		4	0	2.638	1
172	High	Master Protein	O88935	Synapsin-1 [OS=Mus musculus]	0	201.102	48	23	149	20	706	74.1	9.8	460.7	23	cell-cell signaling;cell organization and biogenesis;transport;developmental processes;other biological processes	other membranes;cytosol;cytoskeleton;ER/Golgi;nucleus;other cell component	cytoskeletal activity;other molecular function	Pf02078, Pf02750, Pf10581	20964	ENSMUSG00000037217	Syn1	mmu:20964; O88935; Q62279; Q8QZT8	Dopamine Neurotransmitter Release Cycle; Serotonin Neurotransmitter Release Cycle		2	5	2.638	1
173	High	Master Protein	P62827	GTP-binding nuclear protein Ran [OS=Mus musculus]	0	43.486	36	9	31	9	216	24.4	7.49	84.3	9	cell cycle OR cell proliferation;cell organization and biogenesis;other metabolic processes;transport;developmental processes;other biological processes	cytosol;cytoskeleton;nucleus;other cytoplasmic organelle;other cell component	nucleic acid binding activity;other molecular function	Pf00071	19384	ENSMUSG00000029430	Ran	mmu:19384; P17080; P28746; P28747; P62827; Q3U954; Q811M2; Q86V08; Q9CSP3; Q9CWI7; Q9CZA2; Q9UDJ5; Q9UEU9	Transcriptional regulation by small RNAs; Postmitotic nuclear pore complex (NPC) reformation; Regulation of cholesterol biosynthesis by SREBP (SREBF)		3	0	2.605	1
174	High	Master Protein	Q91V41	Ras-related protein Rab-14 [OS=Mus musculus]	0	51.097	47	9	37	7	215	23.9	6.21	86.61	9	cell organization and biogenesis;stress response;transport;signal transduction;other biological processes	plasma membrane;other membranes;cytosol;ER/Golgi;other cytoplasmic organelle;other cell component	cytoskeletal activity;other molecular function	Pf00071	68365	ENSMUSG00000026878	Rab14	mmu:68365; Q91V41	Neutrophil degranulation; RAB geranylgeranylation; Synthesis of PIPs at the plasma membrane; RAB GEFs exchange GTP for GDP on RABs	Focal adhesion: PI3K-Akt-mTOR signaling pathway	5	0	2.599	1
175	High	Master Protein	Q9WV92	Band 4.1-like protein 3 [OS=Mus musculus]	0	88.621	27	19	38	17	929	103.3	5.31	94.2	19	cell organization and biogenesis;developmental processes;other biological processes	plasma membrane;other membranes;cytosol;cytoskeleton;other cell component	cytoskeletal activity;other molecular function	Pf00373, Pf04382, Pf05902, Pf08736, Pf09379, Pf09380	13823	ENSMUSG00000024044	Epb41l3	mmu:13823; Q69ZT8; Q9R102; Q9WV92	Neurexins and neuroligins	Splicing factor NOVA regulated synaptic proteins	2	2	2.589	1
176	High	Master Protein	P62983	Ubiquitin-40S ribosomal protein S27a [OS=Mus musculus]	0	37.871	31	5	54	5	156	17.9	9.64	105.3	5	protein metabolism;other metabolic processes;other biological processes	cytosol;translational apparatus;nucleus;other cell component	other molecular function	Pf00240, Pf01599	78294	ENSMUSG00000020460	Rps27a	mmu:78294; P02248; P02249; P02250; P49664; P62983; P62991; Q29120; Q62317; Q64223; Q8VCH1; Q91887; Q91888; Q9CXY4; Q9CZM0; Q9D1R5; Q9D2W3; Q9D8D9; Q9ET23; Q9ET24; Q9Z0H9	The role of GTSE1 in G2/M progression after G2 checkpoint; Peroxisomal protein import; Regulation of TP53 Activity through Phosphorylation; EGFR downregulation; MAPK6/MAPK4 signaling; Downstream TCR signaling; FCERI mediated NF-kB activation; Downregulation of ERBB2:ERBB3 signaling; Ovarian tumor domain proteases; Neddylation; Recognition of DNA damage by PCNA-containing replication complex; DNA …	Cytoplasmic ribosomal proteins	143	0	2.585	1
177	High	Master Protein	Q62425	Cytochrome c oxidase subunit NDUFA4 [OS=Mus musculus]	0	19.982	48	4	15	4	82	9.3	9.52	16.41	4	other biological processes	other membranes;mitochondrion	other molecular function	Pf06522	17992	ENSMUSG00000029632	Ndufa4	mmu:17992; Q62425; Q9CQP6	Cytoprotection by HMOX1; TP53 Regulates Metabolic Genes; Respiratory electron transport	Oxidative phosphorylation; Electron transport chain	5	0	2.584	1
178	High	Master Protein	Q921I1	Serotransferrin [OS=Mus musculus]	0	18.57	9	5	9	5	697	76.7	7.18	16.34	5	cell organization and biogenesis;stress response;transport;signal transduction;other biological processes	non-structural extracellular;extracellular matrix;plasma membrane;other membranes;other cytoplasmic organelle;other cell component	signal transduction activity or receptor binding;other molecular function	Pf00405	22041	ENSMUSG00000032554	Tf	mmu:22041; O35421; Q3UBW7; Q58E69; Q61803; Q62357; Q62358; Q62359; Q63915; Q64515; Q8VII5; Q921I1; Q922C0	Cargo recognition for clathrin-mediated endocytosis; Platelet degranulation ; Regulation of Insulin-like Growth Factor (IGF) transport and uptake by Insulin-like Growth Factor Binding Proteins (IGFBPs); Post-translational protein phosphorylation; Transferrin endocytosis and recycling	Iron homeostasis	8	0	2.57	1
179	High	Master Protein	Q9CYT6	Adenylyl cyclase-associated protein 2 [OS=Mus musculus]	0	31.39	16	6	16	5	476	52.8	6.43	34.84	6	cell organization and biogenesis;signal transduction;other biological processes	plasma membrane;other membranes;other cell component	cytoskeletal activity;other molecular function	Pf01213, Pf08603	67252	ENSMUSG00000021373	Cap2	mmu:67252; Q80YU7; Q9CYT6; Q9D6L0			0	0	2.558	1
180	High	Master Protein	Q99104	Unconventional myosin-Va [OS=Mus musculus]	0	56.375	7	10	22	10	1853	215.4	8.63	57	10	cell-cell signaling;cell organization and biogenesis;other metabolic processes;stress response;transport;developmental processes;other biological processes	other membranes;cytosol;cytoskeleton;ER/Golgi;other cytoplasmic organelle;other cell component	cytoskeletal activity;other molecular function	Pf00063, Pf00612, Pf01843	17918	ENSMUSG00000034593	Myo5a	E9PUE5; mmu:17918; Q99104	Regulation of actin dynamics for phagocytic cup formation		1	0	2.557	1
181	High	Master Protein	Q60597	2-oxoglutarate dehydrogenase complex component E1 [OS=Mus musculus]	0	83.735	19	18	42	18	1023	116.4	6.83	92.91	18	protein metabolism;other metabolic processes;developmental processes	other membranes;mitochondrion;nucleus;other cell component	other molecular function	Pf00676, Pf02779, Pf16078, Pf16870	18293	ENSMUSG00000020456	Ogdh	mmu:18293; Q3UDM7; Q5DTI4; Q5SVX7; Q5SVX9; Q60597; Q6PFZ2; Q80Y57; Q8K0K7; Q8K2Z3; Q8R3M2; Q91WP2	Citric acid cycle (TCA cycle); Glyoxylate metabolism and glycine degradation; Lysine catabolism	TCA cycle; Amino acid metabolism; Tryptophan metabolism	6	0	2.552	1
182	High	Master Protein	Q6PHN9	Ras-related protein Rab-35 [OS=Mus musculus]	0	28.436	33	7	29	5	201	23	8.29	50.04	7	cell cycle OR cell proliferation;cell organization and biogenesis;transport;developmental processes;signal transduction;other biological processes	plasma membrane;other membranes;ER/Golgi;other cytoplasmic organelle;other cell component	other molecular function	Pf00071	77407	ENSMUSG00000029518	Rab35	mmu:77407; Q6PHN9	RAB geranylgeranylation; TBC/RABGAPs; RAB GEFs exchange GTP for GDP on RABs		3	0	2.545	1
183	High	Master Protein	Q99PT1	Rho GDP-dissociation inhibitor 1 [OS=Mus musculus]	0	73.051	44	7	35	7	204	23.4	5.2	112.25	7	signal transduction;other biological processes	non-structural extracellular;plasma membrane;other membranes;cytosol;nucleus;other cell component	enzyme regulator activity;other molecular function	Pf02115	192662	ENSMUSG00000025132	Arhgdia	mmu:192662; Q5M9P6; Q8BPI0; Q99KC4; Q99PT1	RHOA GTPase cycle; CDC42 GTPase cycle; RAC1 GTPase cycle; RHOC GTPase cycle; RHOG GTPase cycle; RHOH GTPase cycle; RAC2 GTPase cycle; Axonal growth stimulation; Axonal growth inhibition (RHOA activation)		9	0	2.542	1
184	High	Master Protein	Q9CQC7	NADH dehydrogenase [ubiquinone] 1 beta subcomplex subunit 4 [OS=Mus musculus]	0	17.764	34	4	17	4	129	15.1	9.89	36.13	4	cell organization and biogenesis;other metabolic processes;stress response	other membranes;mitochondrion;nucleus		Pf07225	100042503; 68194	ENSMUSG00000022820	Ndufb4	mmu:100042503; mmu:68194; Q9CQC7	Complex I biogenesis	Electron transport chain	3	0	2.541	1
185	High	Master Protein	Q791V5	Mitochondrial carrier homolog 2 [OS=Mus musculus]	0	44.672	34	8	24	8	303	33.5	8.25	48.36	8	cell organization and biogenesis;other metabolic processes;transport;other biological processes	other membranes;mitochondrion	other molecular function	Pf00153	56428	ENSMUSG00000027282	Mtch2	mmu:56428; Q3TPS5; Q791V5; Q99LZ6; Q9D060; Q9D7Y2; Q9QZP3			0	0	2.502	1
186	High	Master Protein	P51881	ADP/ATP translocase 2 [OS=Mus musculus]	0	179.79	60	22	200	10	298	32.9	9.73	369.5	22	cell cycle OR cell proliferation;cell organization and biogenesis;other metabolic processes;transport;other biological processes	other membranes;cytoskeleton;mitochondrion	transporter activity;other molecular function	Pf00153	11740	ENSMUSG00000016319	Slc25a5	mmu:11740; P51881; Q61311	Transport of nucleosides and free purine and pyrimidine bases across the plasma membrane	Electron transport chain	2	0	2.502	1
187	High	Master Protein	Q640R3	Hepatocyte cell adhesion molecule [OS=Mus musculus]	0	23.79	17	4	9	4	418	46.3	9.42	19.75	4	cell adhesion;cell cycle OR cell proliferation;other biological processes	other membranes;other cell component		Pf07686, Pf13927	72927	ENSMUSG00000046240	Hepacam	mmu:72927; Q640R3			0	0	2.501	1
188	High	Master Protein	O54774	AP-3 complex subunit delta-1 [OS=Mus musculus]	0	22.938	5	4	11	4	1199	135	7.37	22.04	4	cell organization and biogenesis;transport;other biological processes	other membranes;ER/Golgi;other cytoplasmic organelle;other cell component		Pf01602, Pf06375	11776	ENSMUSG00000020198	Ap3d1	mmu:11776; O54774			0	0	2.484	1
189	High	Master Protein	P62823	Ras-related protein Rab-3C [OS=Mus musculus]	0	64.695	44	10	47	6	227	25.9	5.24	106.74	10	transport;other biological processes	plasma membrane;other membranes;cytosol;ER/Golgi;other cytoplasmic organelle;other cell component	cytoskeletal activity;other molecular function	Pf00071	67295	ENSMUSG00000021700	Rab3c	mmu:67295; P62823; Q62858; Q62974; Q63482; Q9CXQ1	RAB geranylgeranylation		1	0	2.471	1
190	High	Master Protein	P20357	Microtubule-associated protein 2 [OS=Mus musculus]	0	14.247	3	4	6	4	1828	199	4.91	8.69	4	cell organization and biogenesis;developmental processes;other biological processes	plasma membrane;other membranes;cytoskeleton;ER/Golgi;nucleus;other cell component	cytoskeletal activity;other molecular function	Pf00418, Pf08377	17756	ENSMUSG00000015222	Map2	E9QLE1; mmu:17756; P20357		Mapk cascade	1	0	2.47	1
191	High	Master Protein	Q61598	Rab GDP dissociation inhibitor beta [OS=Mus musculus]	0	95.908	44	15	53	9	445	50.5	6.25	137.65	15	transport;signal transduction;other biological processes	other membranes;ER/Golgi;other cell component	enzyme regulator activity;other molecular function	Pf00996	14569	ENSMUSG00000021218	Gdi2	mmu:14569; Q541Z9; Q61598; Q8C530; Q9D8M9	Neutrophil degranulation; RAB GEFs exchange GTP for GDP on RABs		2	0	2.463	1
192	High	Master Protein	Q922B2	Aspartate--tRNA ligase, cytoplasmic [OS=Mus musculus]	0	14.571	10	5	10	5	501	57.1	6.49	17.83	5	protein metabolism;RNA metabolism OR transcription;other metabolic processes	cytosol;other cell component	nucleic acid binding activity;other molecular function	Pf00152, Pf01336	226414	ENSMUSG00000026356	Dars1	mmu:226414; Q3U987; Q922B2		Alanine and aspartate metabolism	1	0	2.456	1
193	High	Master Protein	P46660	Alpha-internexin [OS=Mus musculus]	0	53.873	28	16	43	12	501	55.3	5.4	86.63	16	cell organization and biogenesis;developmental processes;other biological processes	cytoskeleton;other cell component	cytoskeletal activity;other molecular function	Pf00038, Pf04732	226180	ENSMUSG00000034336	Ina	mmu:226180; P46660; Q61958; Q8VCW5			0	0	2.456	1
194	High	Master Protein	O70443	Guanine nucleotide-binding protein G(z) subunit alpha [OS=Mus musculus]	0	24.851	19	6	15	5	355	40.8	7.61	27.93	6	signal transduction;other biological processes	plasma membrane;other membranes;cytosol;other cell component	signal transduction activity or receptor binding;enzyme regulator activity;other molecular function	Pf00503	14687	ENSMUSG00000040009	Gnaz	mmu:14687; O70442; O70443; Q61637; Q91WM4	G alpha (z) signalling events	G protein signaling pathways; Calcium regulation in cardiac cells	3	0	2.454	1
195	High	Master Protein	Q8BMF4	Dihydrolipoyllysine-residue acetyltransferase component of pyruvate dehydrogenase complex, mitochondrial [OS=Mus musculus]	0	33.267	17	9	15	9	642	67.9	8.57	25.65	9	other metabolic processes	mitochondrion;other cell component	other molecular function	Pf00198, Pf00364, Pf02817	235339	ENSMUSG00000000168	Dlat	mmu:235339; Q8BMF4; Q8K2G8; Q8R339; Q91ZB1	Glyoxylate metabolism and glycine degradation; Regulation of pyruvate dehydrogenase (PDH) complex; Signaling by Retinoic Acid	Glycolysis and gluconeogenesis; TCA cycle	6	0	2.453	1
196	High	Master Protein	P47754	F-actin-capping protein subunit alpha-2 [OS=Mus musculus]	0	18.838	20	5	15	5	286	32.9	5.85	29.8	5	cell organization and biogenesis	other membranes;cytosol;cytoskeleton;other cell component	cytoskeletal activity	Pf01267	12343	ENSMUSG00000015733	Capza2	mmu:12343; P47754	MHC class II antigen presentation; COPI-mediated anterograde transport; Factors involved in megakaryocyte development and platelet production; HSP90 chaperone cycle for steroid hormone receptors (SHR) in the presence of ligand; COPI-independent Golgi-to-ER retrograde traffic; Advanced glycosylation endproduct receptor signaling		6	0	2.445	1
197	High	Master Protein	Q8BFR5	Elongation factor Tu, mitochondrial [OS=Mus musculus]	0	74.22	42	14	37	14	452	49.5	7.56	80.97	14	protein metabolism;other metabolic processes;other biological processes	mitochondrion;other cell component	nucleic acid binding activity;other molecular function	Pf00009, Pf03143, Pf03144	233870	ENSMUSG00000073838	Tufm	mmu:233870; Q497E7; Q6P919; Q8BFR5			0	0	2.442	1
198	High	Master Protein	Q8BNA6	Protocadherin Fat 3 [OS=Mus musculus]	0	22.575	1	6	11	6	4555	501.7	4.87	27.37	6	cell adhesion;cell organization and biogenesis;developmental processes;other biological processes	plasma membrane;other membranes;other cell component	other molecular function	Pf00028, Pf02210		ENSMUSG00000074505	Fat3	Q08ED4; Q8BNA6			0	0	2.436	1
199	High	Master Protein	P62908	40S ribosomal protein S3 [OS=Mus musculus]	0	25.149	30	9	17	9	243	26.7	9.66	29.73	9	cell cycle OR cell proliferation;cell organization and biogenesis;protein metabolism;DNA metabolism;other metabolic processes;stress response;other biological processes	plasma membrane;other membranes;cytosol;cytoskeleton;mitochondrion;ER/Golgi;translational apparatus;nucleus;other cell component	cytoskeletal activity;nucleic acid binding activity;other molecular function	Pf00189, Pf07650	27050	ENSMUSG00000030744	Rps3	mmu:27050; P17073; P47933; P62908	L13a-mediated translational silencing of Ceruloplasmin expression; SRP-dependent cotranslational protein targeting to membrane; Major pathway of rRNA processing in the nucleolus and cytosol; Formation of a pool of free 40S subunits; GTP hydrolysis and joining of the 60S ribosomal subunit; Nonsense Mediated Decay (NMD) independent of the Exon Junction Complex (EJC); Nonsense Mediated Decay (NMD) e…	Cytoplasmic ribosomal proteins	11	0	2.436	1
200	High	Master Protein	Q920I9	WD repeat-containing protein 7 [OS=Mus musculus]	0	42.989	6	6	12	6	1489	163.3	6.9	18.85	6	other biological processes	ER/Golgi;other cell component		Pf00400	104082	ENSMUSG00000040560	Wdr7	mmu:104082; Q059Q1; Q3U440; Q80TY3; Q920I9; Q920J0			0	0	2.429	1
201	High	Master Protein	P29533	Vascular cell adhesion protein 1 [OS=Mus musculus]	0	80.019	32	18	35	18	739	81.3	5.3	56.55	18	cell adhesion;other metabolic processes;stress response;developmental processes;signal transduction;other biological processes	non-structural extracellular;plasma membrane;other membranes;cytoskeleton;ER/Golgi;other cytoplasmic organelle;other cell component	signal transduction activity or receptor binding;other molecular function	Pf00047, Pf05790, Pf07679, Pf13927		ENSMUSG00000027962	Vcam1	P29533	Immunoregulatory interactions between a Lymphoid and a non-Lymphoid cell; Integrin cell surface interactions		2	0	2.424	1
202	High	Master Protein	P46460	Vesicle-fusing ATPase [OS=Mus musculus]	0	215.208	53	38	115	38	744	82.6	6.95	303.07	38	cell organization and biogenesis;transport;other biological processes	plasma membrane;other membranes;cytosol;ER/Golgi;other cell component	signal transduction activity or receptor binding;other molecular function	Pf00004, Pf02359, Pf02933, Pf17862	18195	ENSMUSG00000034187	Nsf	A2A646; mmu:18195; P46460; Q8BQ65; Q8C3R2; Q8CCT9; Q8CEF0; Q923C6	COPI-dependent Golgi-to-ER retrograde traffic; COPI-mediated anterograde transport; Retrograde transport at the Trans-Golgi-Network; Intra-Golgi traffic; COPII-mediated vesicle transport; Trafficking of GluR2-containing AMPA receptors		6	0	2.423	1
203	High	Master Protein	Q9WUM5	Succinate--CoA ligase [ADP/GDP-forming] subunit alpha, mitochondrial [OS=Mus musculus]	0	62.351	29	10	45	10	346	36.1	9.39	102.18	10	other metabolic processes	mitochondrion;other cell component	other molecular function	Pf00549, Pf02629	56451	ENSMUSG00000052738	Suclg1	mmu:56451; Q8C2C3; Q9DBA3; Q9DCI8; Q9WUM5	Citric acid cycle (TCA cycle)	TCA cycle	2	0	2.415	1
204	High	Master Protein	P14685	26S proteasome non-ATPase regulatory subunit 3 [OS=Mus musculus]	0	24.683	13	6	10	6	530	60.7	8.44	14.78	6	protein metabolism;other metabolic processes;other biological processes	other cell component	enzyme regulator activity	Pf01399, Pf08375	22123	ENSMUSG00000017221	Psmd3	mmu:22123; P14685; Q3TP95; Q99LL7	Neutrophil degranulation; Downstream TCR signaling; FCERI mediated NF-kB activation; Neddylation; Asymmetric localization of PCP proteins; Degradation of AXIN; Hedgehog 'on' state; Ub-specific processing proteases; Regulation of RUNX3 expression and activity; Antigen processing: Ubiquitination & Proteasome degradation; Autodegradation of Cdh1 by Cdh1:APC/C; APC/C:Cdc20 mediated degradation of Sec…	Proteasome degradation	50	0	2.414	1
205	High	Master Protein	Q9CVB6	Actin-related protein 2/3 complex subunit 2 [OS=Mus musculus]	0	83.369	42	16	40	16	300	34.3	7.36	84.24	16	cell organization and biogenesis;signal transduction;other biological processes	plasma membrane;other membranes;cytoskeleton;nucleus;other cytoplasmic organelle;other cell component	signal transduction activity or receptor binding;cytoskeletal activity;other molecular function	Pf04045	76709	ENSMUSG00000006304	Arpc2	mmu:76709; Q3U870; Q9CVB6	Regulation of actin dynamics for phagocytic cup formation; Clathrin-mediated endocytosis; EPHB-mediated forward signaling; RHO GTPases Activate WASPs and WAVEs	Comprehensive IL-17A signaling	5	0	2.412	1
206	High	Master Protein	P47963	60S ribosomal protein L13 [OS=Mus musculus]	0	11.433	18	4	8	4	211	24.3	11.55	10.46	4	protein metabolism;other metabolic processes;developmental processes	cytosol;ER/Golgi;translational apparatus;nucleus;other cell component	nucleic acid binding activity;other molecular function	Pf01294	270106	ENSMUSG00000000740	Rpl13	mmu:270106; P47963; Q9CRZ9; Q9DCH1	Nonsense Mediated Decay (NMD) enhanced by the Exon Junction Complex (EJC); L13a-mediated translational silencing of Ceruloplasmin expression; GTP hydrolysis and joining of the 60S ribosomal subunit; SRP-dependent cotranslational protein targeting to membrane; Major pathway of rRNA processing in the nucleolus and cytosol; Formation of a pool of free 40S subunits; Nonsense Mediated Decay (NMD) inde…	Cytoplasmic ribosomal proteins	8	0	2.41	1
207	High	Master Protein	P35802	Neuronal membrane glycoprotein M6-a [OS=Mus musculus]	0	26.782	15	4	17	4	278	31.1	5.27	33.98	4	cell organization and biogenesis;transport;developmental processes;other biological processes	plasma membrane;other membranes;other cell component	transporter activity	Pf01275	234267	ENSMUSG00000031517	Gpm6a	mmu:234267; P35802			0	0	2.407	1
208	High	Master Protein	Q8BH59	Electrogenic aspartate/glutamate antiporter SLC25A12, mitochondrial [OS=Mus musculus]	0	166.378	49	24	97	24	677	74.5	8.25	248.14	24	other metabolic processes;transport;other biological processes	other membranes;mitochondrion	transporter activity;other molecular function	Pf00153	78830	ENSMUSG00000027010	Slc25a12	A2BFG0; mmu:78830; Q8BH59	Gluconeogenesis; Aspartate and asparagine metabolism		2	0	2.405	1
209	High	Master Protein	P46096	Synaptotagmin-1 [OS=Mus musculus]	0	79.745	41	16	48	16	421	47.4	8.53	135.57	16	cell-cell signaling;cell organization and biogenesis;transport;developmental processes;other biological processes	plasma membrane;other membranes;ER/Golgi;other cell component	signal transduction activity or receptor binding;other molecular function	Pf00168	20979	ENSMUSG00000035864	Syt1	mmu:20979; P46096	Dopamine Neurotransmitter Release Cycle; Serotonin Neurotransmitter Release Cycle; Norepinephrine Neurotransmitter Release Cycle; Glutamate Neurotransmitter Release Cycle; Acetylcholine Neurotransmitter Release Cycle; GABA synthesis, release, reuptake and degradation; Cargo recognition for clathrin-mediated endocytosis		8	0	2.404	1
210	High	Master Protein	Q9JIS5	Synaptic vesicle glycoprotein 2A [OS=Mus musculus]	0	43.372	10	8	32	8	742	82.6	5.57	62.89	8	cell-cell signaling;cell organization and biogenesis;transport;other biological processes	other membranes;ER/Golgi;other cell component	transporter activity;other molecular function	Pf00083, Pf07690	64051	ENSMUSG00000038486	Sv2a	mmu:64051; Q80TT0; Q8R0R5; Q9JIS5			0	0	2.401	1
211	High	Master Protein	P47962	60S ribosomal protein L5 [OS=Mus musculus]	0	7.657	16	4	5	4	297	34.4	9.77	4.63	4	cell organization and biogenesis;protein metabolism;RNA metabolism OR transcription;other metabolic processes;other biological processes	cytosol;ER/Golgi;translational apparatus;nucleus;other cell component	enzyme regulator activity;nucleic acid binding activity;other molecular function	Pf14204, Pf17144	100503670	ENSMUSG00000058558	Rpl5	mmu:100503670; P47962; Q9CR19	L13a-mediated translational silencing of Ceruloplasmin expression; SRP-dependent cotranslational protein targeting to membrane; Major pathway of rRNA processing in the nucleolus and cytosol; Formation of a pool of free 40S subunits; GTP hydrolysis and joining of the 60S ribosomal subunit; Nonsense Mediated Decay (NMD) independent of the Exon Junction Complex (EJC); Nonsense Mediated Decay (NMD) e…		7	0	2.399	1
212	High	Master Protein	Q91VR2	ATP synthase subunit gamma, mitochondrial [OS=Mus musculus]	0	60.298	33	11	49	11	298	32.9	9.01	117.1	11	other metabolic processes;transport	other membranes;mitochondrion	transporter activity;other molecular function	Pf00231	11949	ENSMUSG00000025781	Atp5f1c	mmu:11949; Q91VR2	Formation of ATP by chemiosmotic coupling; Cristae formation	Electron transport chain	3	0	2.393	1
213	High	Master Protein	Q91YQ5	Dolichyl-diphosphooligosaccharide--protein glycosyltransferase subunit 1 [OS=Mus musculus]	0	19.412	10	4	5	4	608	68.5	6.46	12.91	4	protein metabolism;other metabolic processes	other membranes;cytosol;ER/Golgi;other cell component		Pf04597	103963	ENSMUSG00000030062	Rpn1	mmu:103963; Q3U985; Q91YQ5		Proteasome degradation	1	0	2.39	1
214	High	Master Protein	G5E8K5	Ankyrin-3 [OS=Mus musculus]	0	31.027	5	7	17	4	1961	213.9	6.7	37.58	7	cell cycle OR cell proliferation;cell organization and biogenesis;transport;developmental processes;signal transduction;other biological processes	plasma membrane;other membranes;cytosol;cytoskeleton;ER/Golgi;other cytoplasmic organelle;other cell component	cytoskeletal activity;other molecular function	Pf00531, Pf00791, Pf12796, Pf17809	11735	ENSMUSG00000069601	Ank3	G5E8K4; G5E8K5; mmu:11735; O08866; O08867; Q3TSJ8; Q4U205; Q4U206; Q4U256; Q4U260; Q61305; Q61306; Q61307; Q61308; Q61309; Q61310; Q8CBN3; Q8VC68		Splicing factor NOVA regulated synaptic proteins	1	0	2.388	1
215	High	Master Protein	Q9CR62	Mitochondrial 2-oxoglutarate/malate carrier protein [OS=Mus musculus]	0	82.997	54	15	69	15	314	34.1	9.94	140.1	15	other metabolic processes;transport	other membranes;mitochondrion	transporter activity	Pf00153	67863	ENSMUSG00000014606	Slc25a11	mmu:67863; Q9CR62	Gluconeogenesis		1	0	2.382	1
216	High	Master Protein	Q9QYC0	Alpha-adducin [OS=Mus musculus]	0	47.111	18	9	27	8	735	80.6	5.9	60.52	9	cell organization and biogenesis;protein metabolism;other metabolic processes;developmental processes;other biological processes	plasma membrane;other membranes;cytoskeleton;nucleus;other cell component	signal transduction activity or receptor binding;cytoskeletal activity;other molecular function	Pf00596	11518	ENSMUSG00000029106	Add1	mmu:11518; Q9JLE3; Q9QYC0	Miscellaneous transport and binding events; Caspase-mediated cleavage of cytoskeletal proteins		2	0	2.38	1
217	High	Master Protein	Q9DC69	NADH dehydrogenase [ubiquinone] 1 alpha subcomplex subunit 9, mitochondrial [OS=Mus musculus]	0	90.42	53	16	48	16	377	42.5	9.74	120.79	16	cell organization and biogenesis;other metabolic processes;other biological processes	other membranes;mitochondrion	other molecular function	Pf05368	66108	ENSMUSG00000000399	Ndufa9	mmu:66108; Q6GTD3; Q99JP9; Q9DC69	Complex I biogenesis	Oxidative phosphorylation; Electron transport chain	4	0	2.377	1
218	High	Master Protein	P62962	Profilin-1 [OS=Mus musculus]	0	49.425	51	8	35	8	140	14.9	8.28	49.11	8	cell organization and biogenesis;developmental processes;other biological processes	non-structural extracellular;cytosol;cytoskeleton;nucleus;other cell component	signal transduction activity or receptor binding;cytoskeletal activity;other molecular function	Pf00235	18643	ENSMUSG00000018293	Pfn1	mmu:18643; P10924; P62962	RHO GTPases Activate Formins; PCP/CE pathway; Signaling by ROBO receptors	G13 signaling pathway; Regulation of actin cytoskeleton	5	0	2.375	1
219	High	Master Protein	Q8JZZ7	Adhesion G protein-coupled receptor L2 [OS=Mus musculus]	0	20.058	4	5	7	5	1487	166.5	6.71	13.29	5	cell organization and biogenesis;developmental processes;signal transduction;other biological processes	plasma membrane;other membranes;other cell component	other molecular function	Pf00002, Pf01825, Pf02140, Pf02191, Pf02354, Pf02793, Pf16489		ENSMUSG00000028184	Adgrl2	E9Q6C7; Q8BM90; Q8JZZ7		GPCRs, non-odorant	1	0	2.374	1
220	High	Master Protein	O55131	Septin-7 [OS=Mus musculus]	0	105.338	34	16	65	15	436	50.5	8.57	153.89	16	cell cycle OR cell proliferation;cell organization and biogenesis;developmental processes;other biological processes	plasma membrane;other membranes;cytoskeleton;nucleus;other cell component	other molecular function	Pf00735	235072		Septin7	mmu:235072; O55131	MAPK6/MAPK4 signaling		1	1	2.373	1
221	High	Master Protein	P11499	Heat shock protein HSP 90-beta [OS=Mus musculus]	0	117.652	36	26	82	16	724	83.2	5.03	204.67	26	cell organization and biogenesis;DNA metabolism;other metabolic processes;stress response;developmental processes;other biological processes	non-structural extracellular;plasma membrane;other membranes;cytosol;nucleus;other cytoplasmic organelle;other cell component	signal transduction activity or receptor binding;enzyme regulator activity;cytoskeletal activity;nucleic acid binding activity;other molecular function	Pf00183, Pf02518	15516	ENSMUSG00000023944	Hsp90ab1	mmu:15516; O89078; P11499; Q3UIQ7	Neutrophil degranulation; Regulation of actin dynamics for phagocytic cup formation; HSP90 chaperone cycle for steroid hormone receptors (SHR) in the presence of ligand; The role of GTSE1 in G2/M progression after G2 checkpoint; Attenuation phase; Estrogen-dependent gene expression; Sema3A PAK dependent Axon repulsion; Aryl hydrocarbon receptor signalling; DDX58/IFIH1-mediated induction of interf…	Focal adhesion: PI3K-Akt-mTOR signaling pathway	15	10	2.368	1
222	High	Master Protein	P40124	Adenylyl cyclase-associated protein 1 [OS=Mus musculus]	0	105.565	41	15	59	14	474	51.5	7.52	133.72	15	cell organization and biogenesis;transport;signal transduction;other biological processes	non-structural extracellular;plasma membrane;other membranes;cytosol;cytoskeleton;other cell component	cytoskeletal activity;other molecular function	Pf01213, Pf08603	12331	ENSMUSG00000028656	Cap1	mmu:12331; P40124; Q8BPT7	Neutrophil degranulation	Insulin signaling	2	1	2.363	1
223	High	Master Protein	Q61316	Heat shock 70 kDa protein 4 [OS=Mus musculus]	0	50.024	19	14	30	12	841	94.1	5.24	42.28	14	cell organization and biogenesis;stress response;transport;other biological processes	non-structural extracellular;cytosol;mitochondrion;nucleus;other cell component	other molecular function	Pf00012			Hspa4	Q61316	Regulation of HSF1-mediated heat shock response		1	2	2.362	1
224	High	Master Protein	P39053	Dynamin-1 [OS=Mus musculus]	0	232.253	47	44	152	33	867	97.7	7.74	336.82	44	cell organization and biogenesis;transport;other biological processes	plasma membrane;other membranes;cytoskeleton;ER/Golgi;other cell component	signal transduction activity or receptor binding;cytoskeletal activity;other molecular function	Pf00169, Pf00350, Pf01031, Pf02212	13429	ENSMUSG00000026825	Dnm1	A2AN50; A2AN51; A2AN54; A2AN55; mmu:13429; P39053; Q3UNM1; Q5DTN7; Q61358; Q61359; Q61360; Q6PDM5; Q8JZZ4; Q9CSY7; Q9QXX1	MHC class II antigen presentation; Recycling pathway of L1; Clathrin-mediated endocytosis; Formation of annular gap junctions; Toll Like Receptor 4 (TLR4) Cascade	One-carbon metabolism and related pathways; Primary focal segmental glomerulosclerosis (FSGS); IL-3 signaling pathway; EGFR1 signaling pathway	10	8	2.358	1
225	High	Master Protein	P32037	Solute carrier family 2, facilitated glucose transporter member 3 [OS=Mus musculus]	0	20.532	10	4	5	4	493	53.4	4.98	21.3	4	transport;other biological processes	plasma membrane;other membranes;ER/Golgi;other cell component	transporter activity;other molecular function	Pf00083	20527	ENSMUSG00000003153	Slc2a3	mmu:20527; P32037	Neutrophil degranulation; Cellular hexose transport; Vitamin C (ascorbate) metabolism	Glycolysis and gluconeogenesis; Focal adhesion: PI3K-Akt-mTOR signaling pathway	5	0	2.343	1
226	High	Master Protein	P84091	AP-2 complex subunit mu [OS=Mus musculus]	0	109.085	49	19	77	19	435	49.6	9.54	167.65	19	cell organization and biogenesis;transport;other biological processes	plasma membrane;other membranes;other cell component	signal transduction activity or receptor binding;other molecular function	Pf00928, Pf01217	11773	ENSMUSG00000022841	Ap2m1	mmu:11773; P20172; P53679; P84091	Cargo recognition for clathrin-mediated endocytosis; VLDLR internalisation and degradation; MHC class II antigen presentation; Recycling pathway of L1; LDL clearance; Trafficking of GluR2-containing AMPA receptors; Retrograde neurotrophin signalling; Formation of annular gap junctions; WNT5A-dependent internalization of FZD4; WNT5A-dependent internalization of FZD2, FZD5 and ROR2		12	0	2.343	1
227	High	Master Protein	Q8R0S2	IQ motif and SEC7 domain-containing protein 1 [OS=Mus musculus]	0	32.687	8	7	13	5	961	107.9	7.14	31.09	7	cell organization and biogenesis;developmental processes;other biological processes	ER/Golgi;nucleus;other cell component	enzyme regulator activity;other molecular function	Pf01369, Pf16453	232227	ENSMUSG00000034312	Iqsec1	mmu:232227; Q3TZC3; Q5DU15; Q8R0S2			0	1	2.342	1
228	High	Master Protein	Q5PR73	GTP-binding protein Di-Ras2 [OS=Mus musculus]	0	25.887	25	5	16	5	199	22.5	8.76	41.7	5	signal transduction	plasma membrane;other membranes	other molecular function	Pf00071	68203	ENSMUSG00000047842	Diras2	mmu:68203; Q5PR73			0	0	2.337	1
229	High	Master Protein	P11983	T-complex protein 1 subunit alpha [OS=Mus musculus]	0	44.154	18	9	21	9	556	60.4	6.16	38.31	9	transport;other biological processes	cytosol;cytoskeleton;ER/Golgi;other cell component	other molecular function	Pf00118	21454	ENSMUSG00000068039	Tcp1	mmu:21454; P11983; P11984; Q3TJ96; Q3TKU1; Q3U5T8; Q3U7I8; Q3UAA8; Q3UB80; Q3UE48	Cooperation of PDCL (PhLP1) and TRiC/CCT in G-protein beta folding; Association of TriC/CCT with target proteins during biosynthesis		2	0	2.336	1
230	High	Master Protein	O35129	Prohibitin-2 [OS=Mus musculus]	0	58.771	42	10	29	10	299	33.3	9.83	69.67	10	cell cycle OR cell proliferation;cell organization and biogenesis;other metabolic processes;stress response;transport;developmental processes;signal transduction;other biological processes	plasma membrane;other membranes;mitochondrion;nucleus;other cell component	other molecular function	Pf01145	12034	ENSMUSG00000004264	Phb2	mmu:12034; O35129; O89075; Q61336	Processing of SMDT1		1	0	2.332	1
231	High	Master Protein	P61982	14-3-3 protein gamma [OS=Mus musculus]	0	113.529	49	13	76	6	247	28.3	4.89	171.63	13	transport;signal transduction;other biological processes	cytosol;other cell component	signal transduction activity or receptor binding;cytoskeletal activity;other molecular function	Pf00244	22628	ENSMUSG00000051391	Ywhag	mmu:22628; O70457; P35214; P61982; Q3UFD6; Q4FK44; Q9UDP2; Q9UN99	Regulation of PLK1 Activity at G2/M Transition; Anchoring of the basal body to the plasma membrane; Loss of Nlp from mitotic centrosomes; Recruitment of mitotic centrosome proteins and complexes; Recruitment of NuMA to mitotic centrosomes; AURKA Activation by TPX2; TP53 Regulates Metabolic Genes; Activation of BAD and translocation to mitochondria ; RHO GTPases activate PKNs; Chk1/Chk2(Cds1) medi…	Myometrial relaxation and contraction pathways; Calcium regulation in cardiac cells	14	4	2.329	1
232	High	Master Protein	P48962	ADP/ATP translocase 1 [OS=Mus musculus]	0	173.632	63	23	217	11	298	32.9	9.72	409.17	23	cell organization and biogenesis;other metabolic processes;transport;other biological processes	other membranes;mitochondrion	transporter activity;other molecular function	Pf00153	11739	ENSMUSG00000031633	Slc25a4	mmu:11739; P48962; Q62164	Transport of nucleosides and free purine and pyrimidine bases across the plasma membrane	Electron transport chain; mRNA processing	3	17	2.328	1
233	High	Master Protein	Q91V61	Sideroflexin-3 [OS=Mus musculus]	0	71.367	44	13	45	11	321	35.4	9.51	100.11	13	other metabolic processes;transport	other membranes;mitochondrion	transporter activity	Pf03820	94280	ENSMUSG00000025212	Sfxn3	mmu:94280; Q544M7; Q8C1Z2; Q91V61			0	2	2.327	1
234	High	Master Protein	Q5SQX6	Cytoplasmic FMR1-interacting protein 2 [OS=Mus musculus]	0	47.65	9	10	34	10	1253	145.6	7.05	64.44	10	cell adhesion;cell organization and biogenesis;protein metabolism;other metabolic processes;developmental processes;other biological processes	nucleus;other cell component	other molecular function	Pf05994, Pf07159	76884	ENSMUSG00000020340	Cyfip2	mmu:76884; Q3UH21; Q3UHS8; Q5SQX6; Q8BSW0; Q8CHA9; Q924D3; Q9R181	Regulation of actin dynamics for phagocytic cup formation; RHO GTPases Activate WASPs and WAVEs; RAC1 GTPase cycle; VEGFA-VEGFR2 Pathway	Regulation of actin cytoskeleton	5	0	2.325	1
235	High	Master Protein	P48320	Glutamate decarboxylase 2 [OS=Mus musculus]	0	24.193	11	4	9	4	585	65.2	6.9	15.59	4	other metabolic processes;other biological processes	plasma membrane;other membranes;cytosol;ER/Golgi;other cell component	other molecular function	Pf00282	14417	ENSMUSG00000026787	Gad2	mmu:14417; O35519; P48320	GABA synthesis	One-carbon metabolism and related pathways; Alanine and aspartate metabolism; Biogenic amine synthesis	5	0	2.317	1
236	High	Master Protein	P53994	Ras-related protein Rab-2A [OS=Mus musculus]	0	47.087	62	10	25	10	212	23.5	6.54	73.44	10	cell organization and biogenesis;transport	other membranes;ER/Golgi;other cell component	other molecular function	Pf00071	59021	ENSMUSG00000047187	Rab2a	mmu:59021; P53994; Q3UK45	RAB geranylgeranylation; Golgi Cisternae Pericentriolar Stack Reorganization	Focal adhesion: PI3K-Akt-mTOR signaling pathway	3	0	2.312	1
237	High	Master Protein	Q8CAQ8	MICOS complex subunit Mic60 [OS=Mus musculus]	0	55.857	22	12	22	12	757	83.8	6.61	52.14	12	cell organization and biogenesis;other biological processes	other membranes;mitochondrion		Pf09731	76614	ENSMUSG00000052337	Immt	mmu:76614; Q66JS4; Q7TNE2; Q8C7V1; Q8CAQ8; Q8CCI0; Q8CDA8; Q9D9F6			0	0	2.31	1
238	High	Master Protein	Q9QZ88	Vacuolar protein sorting-associated protein 29 [OS=Mus musculus]	0	20.137	29	4	12	4	182	20.5	6.79	36.34	4	transport	other membranes;cytosol;other cytoplasmic organelle;other cell component	other molecular function	Pf12850	56433	ENSMUSG00000029462	Vps29	mmu:56433; Q3UCZ0; Q9D107; Q9QZ88	WNT ligand biogenesis and trafficking		1	0	2.309	1
239	High	Master Protein	Q8CI94	Glycogen phosphorylase, brain form [OS=Mus musculus]	0	109.159	31	22	53	17	843	96.7	6.73	125.41	22	other metabolic processes	other cell component	other molecular function	Pf00343	110078	ENSMUSG00000033059	Pygb	mmu:110078; Q8CI94; Q8K283	Neutrophil degranulation	Glycogen metabolism	2	4	2.309	1
240	High	Master Protein	P63005	Platelet-activating factor acetylhydrolase IB subunit beta [OS=Mus musculus]	0	36.815	21	7	18	7	410	46.6	7.37	38.95	7	cell-cell signaling;cell cycle OR cell proliferation;cell organization and biogenesis;other metabolic processes;stress response;transport;developmental processes;signal transduction;other biological processes	other membranes;cytosol;cytoskeleton;nucleus;other cell component	cytoskeletal activity;other molecular function	Pf00400, Pf08513	18472	ENSMUSG00000020745	Pafah1b1	mmu:18472; O35592; P43035; P63005; P81692; Q9R2A6	Anchoring of the basal body to the plasma membrane; Separation of Sister Chromatids; Regulation of PLK1 Activity at G2/M Transition; Amplification of signal from unattached kinetochores via a MAD2 inhibitory signal; Resolution of Sister Chromatid Cohesion; Loss of Nlp from mitotic centrosomes; Recruitment of mitotic centrosome proteins and complexes; Recruitment of NuMA to mitotic centrosomes; RH…	Wnt signaling pathway; Wnt signaling pathway and pluripotency	16	0	2.3	1
241	High	Master Protein	P16858	Glyceraldehyde-3-phosphate dehydrogenase [OS=Mus musculus]	0	300.252	60	19	227	19	333	35.8	8.25	751.8	19	cell organization and biogenesis;protein metabolism;other metabolic processes;stress response;signal transduction;other biological processes	plasma membrane;other membranes;cytosol;cytoskeleton;nucleus;other cytoplasmic organelle;other cell component	enzyme regulator activity;cytoskeletal activity;other molecular function	Pf00044, Pf02800	14433	ENSMUSG00000057666	Gapdh	A6H6A8; mmu:14433; P16858; Q0QEU0; Q3THM2; Q3TUI2; Q3UMT2; Q4V783; Q569X2; Q569X5; Q5U410	Gluconeogenesis; Glycolysis	Glycolysis and gluconeogenesis	3	0	2.3	1
242	High	Master Protein	Q9D051	Pyruvate dehydrogenase E1 component subunit beta, mitochondrial [OS=Mus musculus]	0	58.267	41	11	36	11	359	38.9	6.87	78.82	11	other metabolic processes	mitochondrion;nucleus;other cell component	other molecular function	Pf02779, Pf02780	68263	ENSMUSG00000021748	Pdhb	mmu:68263; Q3TL86; Q505N8; Q99LW9; Q9D051	Glyoxylate metabolism and glycine degradation; Regulation of pyruvate dehydrogenase (PDH) complex; Signaling by Retinoic Acid	Glycolysis and gluconeogenesis; TCA cycle	6	0	2.298	1
243	High	Master Protein	Q9D172	Glutamine amidotransferase-like class 1 domain-containing protein 3, mitochondrial [OS=Mus musculus]	0	18.716	14	4	5	4	266	28.1	8.78	12.06	4					28295	ENSMUSG00000053329	Gatd3	mmu:28295; Q9D172			0	0	2.296	1
244	High	Master Protein	Q8CHC4	Synaptojanin-1 [OS=Mus musculus]	0	59.62	11	16	44	16	1574	172.5	6.89	67.08	16	cell-cell signaling;cell organization and biogenesis;other metabolic processes;transport;developmental processes;signal transduction;other biological processes	plasma membrane;other membranes;cytoskeleton;other cell component	nucleic acid binding activity;other molecular function	Pf02383, Pf03372, Pf08952			Synj1	Q8CHC4	Clathrin-mediated endocytosis; Synthesis of IP3 and IP4 in the cytosol; Synthesis of PIPs at the plasma membrane; Synthesis of IP2, IP, and Ins in the cytosol		4	0	2.296	1
245	High	Master Protein	Q9DBG3	AP-2 complex subunit beta [OS=Mus musculus]	0	134.204	39	31	83	17	937	104.5	5.38	160.63	31	cell organization and biogenesis;transport;developmental processes;other biological processes	plasma membrane;other membranes;other cell component	other molecular function	Pf01602, Pf02883, Pf09066	71770	ENSMUSG00000035152	Ap2b1	mmu:71770; Q80XJ4; Q9DBG3	Cargo recognition for clathrin-mediated endocytosis; VLDLR internalisation and degradation; MHC class II antigen presentation; Recycling pathway of L1; LDL clearance; Trafficking of GluR2-containing AMPA receptors; Retrograde neurotrophin signalling; WNT5A-dependent internalization of FZD4; WNT5A-dependent internalization of FZD2, FZD5 and ROR2		10	10	2.296	1
246	High	Master Protein	Q91V14	Solute carrier family 12 member 5 [OS=Mus musculus]	0	65.9	14	12	32	12	1138	126.2	6.74	80.94	12	cell-cell signaling;cell organization and biogenesis;stress response;transport;developmental processes;other biological processes	plasma membrane;other membranes;other cell component	transporter activity;other molecular function	Pf00324, Pf03522	57138	ENSMUSG00000017740	Slc12a5	A2A5L0; mmu:57138; Q3UHQ2; Q7TQC9; Q80TI5; Q91V14; Q9Z0M7	Cation-coupled Chloride cotransporters		1	0	2.293	1
247	High	Master Protein	Q9R1T4	Septin-6 [OS=Mus musculus]	0	61.096	32	11	24	6	434	49.6	6.43	59.01	11	cell cycle OR cell proliferation;cell organization and biogenesis;other biological processes	plasma membrane;other membranes;cytoskeleton;ER/Golgi;other cell component	other molecular function	Pf00735	56526	ENSMUSG00000050379	Septin6	A2A3V9; A2A3W0; mmu:56526; Q3TRH9; Q3TUA2; Q542H3; Q6A0C4; Q8C2L2; Q8C848; Q91XH2; Q9CZ94; Q9R1T4			0	0	2.28	1
248	High	Master Protein	Q8VEM8	Phosphate carrier protein, mitochondrial [OS=Mus musculus]	0	63.525	43	13	41	13	357	39.6	9.26	56.98	13	transport		transporter activity;other molecular function	Pf00153	18674	ENSMUSG00000061904	Slc25a3	mmu:18674; Q542V7; Q8VEM8			0	0	2.28	1
249	High	Master Protein	Q05793	Basement membrane-specific heparan sulfate proteoglycan core protein [OS=Mus musculus]	0	96.364	6	16	42	16	3707	398	6.32	84.05	16	cell organization and biogenesis;transport;developmental processes;signal transduction;other biological processes	non-structural extracellular;extracellular matrix;ER/Golgi	other molecular function	Pf00008, Pf00052, Pf00053, Pf00054, Pf00057, Pf07679, Pf13927	15530		Hspg2	mmu:15530; Q05793			0	0	2.277	1
250	High	Master Protein	Q91ZJ5	UTP--glucose-1-phosphate uridylyltransferase [OS=Mus musculus]	0	19.606	11	5	9	5	508	56.9	7.61	13.56	5	other metabolic processes;developmental processes	other cell component	other molecular function	Pf01704	216558	ENSMUSG00000001891	Ugp2	mmu:216558; Q8R3D2; Q91ZJ5	Formation of the active cofactor, UDP-glucuronate; Glycogen synthesis	Glucuronidation; Glycogen metabolism; Exercise-induced circadian regulation	5	0	2.271	1
251	High	Master Protein	P07901	Heat shock protein HSP 90-alpha [OS=Mus musculus]	0	127.531	37	26	74	16	733	84.7	5.01	184.3	26	cell organization and biogenesis;DNA metabolism;other metabolic processes;stress response;transport;developmental processes;other biological processes	extracellular matrix;plasma membrane;other membranes;cytosol;cytoskeleton;mitochondrion;nucleus;other cell component	signal transduction activity or receptor binding;enzyme regulator activity;cytoskeletal activity;nucleic acid binding activity;other molecular function	Pf00183, Pf02518	15519	ENSMUSG00000021270	Hsp90aa1	mmu:15519; P07901	Neutrophil degranulation; Recruitment of NuMA to mitotic centrosomes; HSP90 chaperone cycle for steroid hormone receptors (SHR) in the presence of ligand; The role of GTSE1 in G2/M progression after G2 checkpoint; Regulation of actin dynamics for phagocytic cup formation; Downregulation of ERBB2 signaling; Anchoring of the basal body to the plasma membrane; Regulation of PLK1 Activity at G2/M Tra…	EBV LMP1 signaling; Focal adhesion: PI3K-Akt-mTOR signaling pathway; IL-6 signaling pathway; IL-2 signaling pathway	32	0	2.265	1
252	High	Master Protein	G5E829	Plasma membrane calcium-transporting ATPase 1 [OS=Mus musculus]	0	220.161	26	27	106	12	1220	134.7	5.91	310.63	27	stress response;transport;developmental processes;other biological processes	plasma membrane;other membranes;ER/Golgi;nucleus;other cell component	transporter activity;other molecular function	Pf00122, Pf00689, Pf00690, Pf00702, Pf12424, Pf13246	67972	ENSMUSG00000019943	Atp2b1	G5E829; mmu:67972	Ion homeostasis; Ion transport by P-type ATPases; Reduction of cytosolic Ca++ levels	Splicing factor NOVA regulated synaptic proteins; Calcium regulation in cardiac cells	5	2	2.256	1
253	High	Master Protein	P62918	60S ribosomal protein L8 [OS=Mus musculus]	0	21.607	17	5	11	5	257	28	11.03	22.42	5	protein metabolism;other metabolic processes;other biological processes	cytosol;translational apparatus;other cell component	nucleic acid binding activity;other molecular function	Pf00181, Pf03947	26961	ENSMUSG00000003970	Rpl8	mmu:26961; P25120; P62918; Q3V288	L13a-mediated translational silencing of Ceruloplasmin expression; SRP-dependent cotranslational protein targeting to membrane; Major pathway of rRNA processing in the nucleolus and cytosol; Formation of a pool of free 40S subunits; GTP hydrolysis and joining of the 60S ribosomal subunit; Nonsense Mediated Decay (NMD) independent of the Exon Junction Complex (EJC); Nonsense Mediated Decay (NMD) e…	Cytoplasmic ribosomal proteins; mRNA processing	9	0	2.253	1
254	High	Master Protein	P42932	T-complex protein 1 subunit theta [OS=Mus musculus]	0	19.989	10	5	9	5	548	59.5	5.62	19.96	5	cell organization and biogenesis;transport;other biological processes	cytosol;cytoskeleton;nucleus;other cell component	other molecular function	Pf00118	12469	ENSMUSG00000025613	Cct8	mmu:12469; P42932	Neutrophil degranulation; Cooperation of PDCL (PhLP1) and TRiC/CCT in G-protein beta folding; Association of TriC/CCT with target proteins during biosynthesis		3	0	2.251	1
255	High	Master Protein	Q60932	Voltage-dependent anion-selective channel protein 1 [OS=Mus musculus]	0	161.934	76	17	114	16	296	32.3	8.43	348.64	17	cell-cell signaling;other metabolic processes;stress response;transport;other biological processes	plasma membrane;other membranes;mitochondrion;ER/Golgi;other cell component	transporter activity;other molecular function	Pf01459	22333	ENSMUSG00000020402	Vdac1	B1ASZ9; mmu:22333; Q5SVC6; Q60932	Ub-specific processing proteases; PINK1-PRKN Mediated Mitophagy; Pyruvate metabolism		3	1	2.251	1
256	High	Master Protein	P52480	Pyruvate kinase PKM [OS=Mus musculus]	0	211.772	54	25	129	25	531	57.8	7.47	365.82	25	cell organization and biogenesis;RNA metabolism OR transcription;other metabolic processes;developmental processes;other biological processes	cytosol;ER/Golgi;nucleus;other cell component	nucleic acid binding activity;kinase activity;other molecular function	Pf00224, Pf02887	18746	ENSMUSG00000032294	Pkm	mmu:18746; P52480; Q3TBV8; Q3TBW5; Q3TC59; Q3U1X3; Q3U5P6; Q4VC20; Q64484; Q91YI8; Q9CWB1	Neutrophil degranulation; Glycolysis	Glycolysis and gluconeogenesis; Purine metabolism	4	0	2.247	1
257	High	Master Protein	Q9DC70	NADH dehydrogenase [ubiquinone] iron-sulfur protein 7, mitochondrial [OS=Mus musculus]	0	10.271	13	4	15	4	224	24.7	9.92	5.09	4	cell organization and biogenesis;other metabolic processes;transport	plasma membrane;other membranes;mitochondrion;other cell component	transporter activity;other molecular function	Pf01058	75406	ENSMUSG00000020153	Ndufs7	mmu:75406; Q9DC70	Complex I biogenesis	Oxidative phosphorylation; Electron transport chain	4	0	2.239	1
258	High	Master Protein	P50247	Adenosylhomocysteinase [OS=Mus musculus]	0	30.282	17	7	21	7	432	47.7	6.54	38.93	7	other metabolic processes;stress response;other biological processes	cytosol;nucleus;other cell component	other molecular function	Pf00670, Pf05221	11615; 269378	ENSMUSG00000027597; ENSMUSG00000048087	Ahcy	mmu:11615; mmu:269378; P50247; Q91WF1	Methylation; Sulfur amino acid metabolism	One-carbon metabolism; Glutathione and one-carbon metabolism	4	0	2.235	1
259	High	Master Protein	Q91V92	ATP-citrate synthase [OS=Mus musculus]	0	47.167	14	13	23	13	1091	119.7	7.44	45.48	13	other metabolic processes	cytosol;nucleus	other molecular function	Pf00285, Pf00549, Pf02629, Pf16114	104112	ENSMUSG00000020917	Acly	mmu:104112; Q91V92	Neutrophil degranulation; Fatty acyl-CoA biosynthesis	Fatty acid biosynthesis	3	0	2.234	1
260	High	Master Protein	Q62108	Disks large homolog 4 [OS=Mus musculus]	0	42.901	17	9	26	9	724	80.4	5.87	55.83	9	cell-cell signaling;cell organization and biogenesis;developmental processes;other biological processes	plasma membrane;other membranes;cytosol;cytoskeleton;mitochondrion;ER/Golgi;other cell component	signal transduction activity or receptor binding;cytoskeletal activity;other molecular function	Pf00018, Pf00595, Pf00625, Pf10600, Pf10608	13385	ENSMUSG00000020886	Dlg4	mmu:13385; Q5NCV5; Q5NCV6; Q5NCV7; Q62108; Q91WJ1	Activation of Ca-permeable Kainate Receptor; RAF/MAP kinase cascade; Synaptic adhesion-like molecules; Unblocking of NMDA receptors, glutamate binding and activation; Neurexins and neuroligins; Trafficking of AMPA receptors; RHO GTPases activate CIT; LGI-ADAM interactions	Wnt signaling pathway	9	0	2.233	1
261	High	Master Protein	Q02053	Ubiquitin-like modifier-activating enzyme 1 [OS=Mus musculus]	0	19.533	8	7	9	7	1058	117.7	5.66	8.28	7	protein metabolism;other metabolic processes;stress response	other membranes;cytosol;mitochondrion;ER/Golgi;nucleus;other cytoplasmic organelle;other cell component	other molecular function	Pf00899, Pf09358, Pf10585, Pf16190, Pf16191	22201	ENSMUSG00000001924	Uba1	A6H6S6; mmu:22201; P31253; Q02053; Q542H8	Antigen processing: Ubiquitination & Proteasome degradation; Synthesis of active ubiquitin: roles of E1 and E2 enzymes	Parkinson's disease; Proteasome degradation	4	0	2.232	1
262	High	Master Protein	P28660	Nck-associated protein 1 [OS=Mus musculus]	0	75.528	18	18	35	18	1128	128.7	6.62	49.23	18	cell organization and biogenesis;developmental processes;signal transduction;other biological processes	plasma membrane;other membranes;cytoskeleton;other cell component	other molecular function	Pf09735	50884	ENSMUSG00000027002	Nckap1	mmu:50884; P28660; Q3UPY6; Q80TX0; Q8CG49; Q99KY0	VEGFA-VEGFR2 Pathway; Regulation of actin dynamics for phagocytic cup formation; RAC1 GTPase cycle; RAC2 GTPase cycle; RAC3 GTPase cycle; RHO GTPases Activate WASPs and WAVEs	Regulation of actin cytoskeleton; Exercise-induced circadian regulation	8	0	2.223	1
263	High	Master Protein	P48722	Heat shock 70 kDa protein 4L [OS=Mus musculus]	0	32.536	18	10	12	9	838	94.3	5.74	19.25	10	stress response;other biological processes	cytosol;nucleus;other cell component	other molecular function	Pf00012	18415	ENSMUSG00000025757	Hspa4l	mmu:18415; P48722; P97854; Q3TQN2; Q3UNG4; Q8BQD0; Q8CC45; Q91X29	Regulation of HSF1-mediated heat shock response		1	0	2.222	1
264	High	Master Protein	Q9Z2I9	Succinate--CoA ligase [ADP-forming] subunit beta, mitochondrial [OS=Mus musculus]	0	39.008	22	9	39	9	463	50.1	7.01	63.61	9	other metabolic processes	other cell component	other molecular function	Pf00549, Pf08442	20916	ENSMUSG00000022110	Sucla2	mmu:20916; Q3TVH1; Q8BGS6; Q9Z2I9	Citric acid cycle (TCA cycle)	TCA cycle	2	0	2.218	1
265	High	Master Protein	Q9D0M5	Dynein light chain 2, cytoplasmic [OS=Mus musculus]	0	51.544	65	7	29	4	89	10.3	7.37	78.78	7	other biological processes	cytoskeleton;other cell component	other molecular function	Pf01221	68097	ENSMUSG00000020483	Dynll2	A7M7R8; mmu:68097; Q3TFB4; Q9D0M5	MHC class II antigen presentation; COPI-mediated anterograde transport; Separation of Sister Chromatids; Resolution of Sister Chromatid Cohesion; RHO GTPases Activate Formins; EML4 and NUDC in mitotic spindle formation; HSP90 chaperone cycle for steroid hormone receptors (SHR) in the presence of ligand; Intraflagellar transport; COPI-independent Golgi-to-ER retrograde traffic; Aggrephagy; Amplifi…		14	3	2.217	1
266	High	Master Protein	P14094	Sodium/potassium-transporting ATPase subunit beta-1 [OS=Mus musculus]	0	93.764	36	14	67	14	304	35.2	8.65	123.03	14	cell adhesion;other metabolic processes;stress response;transport;signal transduction;other biological processes	plasma membrane;other membranes;cytoskeleton;other cell component	transporter activity;other molecular function	Pf00287	11931	ENSMUSG00000026576	Atp1b1	mmu:11931; P14094	Ion homeostasis; Ion transport by P-type ATPases	Calcium regulation in cardiac cells	3	0	2.217	1
267	High	Master Protein	Q8C8R3	Ankyrin-2 [OS=Mus musculus]	0	122.416	8	22	57	19	3898	426	5.17	155.27	22	cell-cell signaling;cell organization and biogenesis;transport;developmental processes;signal transduction;other biological processes	plasma membrane;other membranes;cytoskeleton;mitochondrion;other cytoplasmic organelle;other cell component	cytoskeletal activity;other molecular function	Pf00531, Pf00791, Pf12796, Pf13637, Pf17809	109676	ENSMUSG00000032826	Ank2	mmu:109676; Q3TM62; Q3V2X0; Q6PCN2; Q80ZZ7; Q8BNC1; Q8C445; Q8C8R3; Q8CCV0			0	3	2.212	1
268	High	Master Protein	P70404	Isocitrate dehydrogenase [NAD] subunit gamma 1, mitochondrial [OS=Mus musculus]	0	31.686	23	6	18	6	393	42.8	9.01	43.67	6	other metabolic processes;other biological processes	mitochondrion;nucleus	other molecular function	Pf00180	15929	ENSMUSG00000002010	Idh3g	mmu:15929; P70404	Citric acid cycle (TCA cycle)	TCA cycle	2	0	2.209	1
269	High	Master Protein	Q8C1B7	Septin-11 [OS=Mus musculus]	0	77.426	29	13	50	7	431	49.7	6.68	118.76	13	cell cycle OR cell proliferation;other biological processes	cytoskeleton;other cell component	other molecular function	Pf00735	52398	ENSMUSG00000058013	Septin11	mmu:52398; Q3TBA0; Q3TC24; Q5D0F0; Q6P2K5; Q6P6I0; Q8C1B7			0	4	2.203	1
270	High	Master Protein	Q8QZT1	Acetyl-CoA acetyltransferase, mitochondrial [OS=Mus musculus]	0	126.414	48	15	67	15	424	44.8	8.51	170.47	15	other metabolic processes;stress response;developmental processes;other biological processes	mitochondrion;ER/Golgi	other molecular function	Pf00108, Pf02803	110446	ENSMUSG00000032047	Acat1	mmu:110446; Q3TE92; Q8QZT1	Branched-chain amino acid catabolism; Synthesis of Ketone Bodies; Utilization of Ketone Bodies	Fatty acid beta-oxidation; Synthesis and degradation of ketone bodies; Tryptophan metabolism	6	0	2.203	1
271	High	Master Protein	P49615	Cyclin-dependent kinase 5 [OS=Mus musculus]	0	17.923	16	5	11	5	292	33.3	7.66	16.48	5	cell adhesion;cell-cell signaling;cell cycle OR cell proliferation;cell organization and biogenesis;protein metabolism;other metabolic processes;stress response;transport;developmental processes;signal transduction;other biological processes	plasma membrane;other membranes;cytosol;cytoskeleton;nucleus;other cell component	signal transduction activity or receptor binding;cytoskeletal activity;kinase activity;other molecular function	Pf00069	12568	ENSMUSG00000028969	Cdk5	mmu:12568; P49615	Regulation of TP53 Activity through Phosphorylation; DARPP-32 events; CRMPs in Sema3A signaling	Alzheimer's disease; IL-6 signaling pathway	5	0	2.201	1
272	High	Master Protein	O08599	Syntaxin-binding protein 1 [OS=Mus musculus]	0	305.22	58	34	179	34	594	67.5	6.96	477.86	34	cell adhesion;cell-cell signaling;cell organization and biogenesis;stress response;transport;developmental processes;other biological processes	plasma membrane;other membranes;cytosol;cytoskeleton;nucleus;other cell component	other molecular function	Pf00995	20910	ENSMUSG00000026797	Stxbp1	A2ARS2; A2ARS3; A2ARS4; mmu:20910; O08599; Q5WAC6; Q8VD51	Dopamine Neurotransmitter Release Cycle; Serotonin Neurotransmitter Release Cycle; Norepinephrine Neurotransmitter Release Cycle; Glutamate Neurotransmitter Release Cycle; Acetylcholine Neurotransmitter Release Cycle; GABA synthesis, release, reuptake and degradation	EGFR1 signaling pathway; Insulin signaling	8	0	2.2	1
273	High	Master Protein	Q60931	Voltage-dependent anion-selective channel protein 3 [OS=Mus musculus]	0	58.302	33	10	37	9	283	30.7	8.79	92.9	10	cell-cell signaling;cell organization and biogenesis;stress response;transport;other biological processes	other membranes;mitochondrion;ER/Golgi	transporter activity;other molecular function	Pf01459	22335	ENSMUSG00000008892	Vdac3	mmu:22335; Q60931; Q8BNG2	Ub-specific processing proteases		1	0	2.194	1
274	High	Master Protein	P35980	60S ribosomal protein L18 [OS=Mus musculus]	0	13.689	21	4	10	4	188	21.6	11.78	4.8	4	protein metabolism;other metabolic processes	cytosol;ER/Golgi;translational apparatus;nucleus;other cell component	nucleic acid binding activity;other molecular function	Pf17135	19899	ENSMUSG00000059070	Rpl18	mmu:19899; P35980; Q9CQF1; Q9D987	L13a-mediated translational silencing of Ceruloplasmin expression; SRP-dependent cotranslational protein targeting to membrane; Major pathway of rRNA processing in the nucleolus and cytosol; Formation of a pool of free 40S subunits; GTP hydrolysis and joining of the 60S ribosomal subunit; Nonsense Mediated Decay (NMD) independent of the Exon Junction Complex (EJC); Nonsense Mediated Decay (NMD) e…	Cytoplasmic ribosomal proteins	8	0	2.192	1
275	High	Master Protein	Q02248	Catenin beta-1 [OS=Mus musculus]	0	38.838	11	8	19	6	781	85.4	5.86	34.77	8	cell adhesion;cell-cell signaling;cell cycle OR cell proliferation;cell organization and biogenesis;protein metabolism;RNA metabolism OR transcription;other metabolic processes;transport;developmental processes;signal transduction;other biological processes	plasma membrane;other membranes;cytosol;cytoskeleton;nucleus;other cell component	signal transduction activity or receptor binding;nucleic acid binding activity;other molecular function	Pf00514	12387	ENSMUSG00000006932	Ctnnb1	mmu:12387; Q02248; Q922W1; Q9D335	RHO GTPases activate IQGAPs; Adherens junctions interactions; Myogenesis; Deactivation of the beta-catenin transactivating complex; Ca2+ pathway; Formation of the beta-catenin:TCF transactivating complex; LRR FLII-interacting protein 1 (LRRFIP1) activates type I IFN production; Apoptotic cleavage of cell adhesion proteins; Beta-catenin phosphorylation cascade; Disassembly of the destruction compl…	TGF-beta signaling pathway; IL-5 signaling pathway; MicroRNAs in cardiomyocyte hypertrophy; Mechanisms associated with pluripotency; Ptf1a related regulatory pathway; Heart development; Neural crest differentiation; Primary focal segmental glomerulosclerosis (FSGS); ESC pluripotency pathways; Wnt signaling in kidney disease; Wnt signaling pathway; Adipogenesis genes; ID signaling pathway; A netwo…	32	0	2.191	1
276	High	Master Protein	P28652	Calcium/calmodulin-dependent protein kinase type II subunit beta [OS=Mus musculus]	0	98.46	43	17	65	7	542	60.4	7.28	128.2	17	cell cycle OR cell proliferation;cell organization and biogenesis;protein metabolism;other metabolic processes;transport;developmental processes;signal transduction;other biological processes	other membranes;cytosol;cytoskeleton;ER/Golgi;other cell component	cytoskeletal activity;kinase activity;other molecular function	Pf00069, Pf08332	12323	ENSMUSG00000057897	Camk2b	mmu:12323; P28652; Q5SVH9	HSF1-dependent transactivation; Ion homeostasis; Ion transport by P-type ATPases; Trafficking of AMPA receptors; RAF activation; Interferon gamma signaling; Unblocking of NMDA receptors, glutamate binding and activation	Serotonin and anxiety; Primary focal segmental glomerulosclerosis (FSGS); Myometrial relaxation and contraction pathways; Wnt signaling pathway; Calcium regulation in cardiac cells	13	6	2.188	1
277	High	Master Protein	P63001	Ras-related C3 botulinum toxin substrate 1 [OS=Mus musculus]	0	51.612	46	10	48	5	192	21.4	8.5	111.27	10	cell adhesion;cell-cell signaling;cell cycle OR cell proliferation;cell organization and biogenesis;stress response;transport;developmental processes;signal transduction;other biological processes	plasma membrane;other membranes;cytosol;cytoskeleton;ER/Golgi;nucleus;other cytoplasmic organelle;other cell component	other molecular function	Pf00071	19353	ENSMUSG00000001847	Rac1	mmu:19353; O95501; P15154; P63001; Q9BTB4	Neutrophil degranulation; MAPK6/MAPK4 signaling; Signaling by SCF-KIT; RHO GTPases Activate NADPH Oxidases; Factors involved in megakaryocyte development and platelet production; RHO GTPases activate PAKs; RHO GTPases activate PKNs; MET activates RAP1 and RAC1; Regulation of actin dynamics for phagocytic cup formation; FCERI mediated MAPK activation; PIP3 activates AKT signaling; PI5P, PP2A and I…	IL-5 signaling pathway; MicroRNAs in cardiomyocyte hypertrophy; BDNF pathway; Chemokine signaling pathway; G13 signaling pathway; p38 Mapk signaling pathway; Microglia pathogen phagocytosis pathway; IL-3 signaling pathway; Robo4 and VEGF signaling pathways crosstalk; IL-6 signaling pathway; Wnt signaling pathway; Oxidative stress and redox pathway; Alpha 6 beta 4 integrin signaling pathway; Mapk …	57	5	2.186	1
278	High	Master Protein	P26443	Glutamate dehydrogenase 1, mitochondrial [OS=Mus musculus]	0	116.856	41	19	59	19	558	61.3	8	171.09	19	other metabolic processes;developmental processes;other biological processes	mitochondrion;ER/Golgi;other cell component	other molecular function	Pf00208, Pf02812	14661	ENSMUSG00000021794	Glud1	mmu:14661; P26443; Q8C273	Glutamate and glutamine metabolism; Transcriptional activation of mitochondrial biogenesis		2	0	2.186	1
279	High	Master Protein	P14211	Calreticulin [OS=Mus musculus]	0	34.927	25	9	20	9	416	48	4.49	34.51	9	cell organization and biogenesis;protein metabolism;other metabolic processes;stress response;transport;developmental processes;other biological processes	non-structural extracellular;extracellular matrix;plasma membrane;other membranes;cytosol;ER/Golgi;nucleus;other cytoplasmic organelle;other cell component	signal transduction activity or receptor binding;nucleic acid binding activity;other molecular function	Pf00262	12317	ENSMUSG00000003814	Calr	mmu:12317; P14211; Q3TVD2	ER-Phagosome pathway; Antigen Presentation: Folding, assembly and peptide loading of class I MHC; Scavenging by Class A Receptors; Calnexin/calreticulin cycle	Calcium regulation in cardiac cells	5	0	2.185	1
280	High	Master Protein	Q9R0K7	Plasma membrane calcium-transporting ATPase 2 [OS=Mus musculus]	0	202.166	28	29	102	17	1198	132.5	5.96	277.42	29	cell organization and biogenesis;other metabolic processes;transport;developmental processes;other biological processes	plasma membrane;other membranes;ER/Golgi;other cell component	signal transduction activity or receptor binding;transporter activity;other molecular function	Pf00122, Pf00689, Pf00690, Pf08282, Pf12424, Pf13246	11941	ENSMUSG00000030302	Atp2b2	mmu:11941; O88863; Q9R0K7	Ion homeostasis; Ion transport by P-type ATPases; Reduction of cytosolic Ca++ levels	Calcium regulation in cardiac cells	4	14	2.183	1
281	High	Master Protein	Q80SW1	S-adenosylhomocysteine hydrolase-like protein 1 [OS=Mus musculus]	0	85.162	36	13	34	13	530	58.9	6.89	80.71	13	cell organization and biogenesis;RNA metabolism OR transcription;other metabolic processes;transport;signal transduction;other biological processes	plasma membrane;other membranes;cytosol;ER/Golgi;other cell component	nucleic acid binding activity;other molecular function	Pf00670, Pf05221	229709	ENSMUSG00000027893	Ahcyl1	mmu:229709; Q80SW1	Ion homeostasis	One-carbon metabolism and related pathways	2	0	2.179	1
282	High	Master Protein	Q91WC3	Long-chain-fatty-acid--CoA ligase 6 [OS=Mus musculus]	0	13.058	6	4	6	4	697	78	7.34	11.66	4	cell cycle OR cell proliferation;other metabolic processes;transport;developmental processes;other biological processes	other membranes;mitochondrion;ER/Golgi;nucleus;other cytoplasmic organelle	other molecular function	Pf00501, Pf13193	216739	ENSMUSG00000020333	Acsl6	mmu:216739; Q80ZF1; Q91WC3	Synthesis of very long-chain fatty acyl-CoAs	Fatty acid beta-oxidation; PPAR signaling pathway; Fatty acid biosynthesis	4	0	2.176	1
283	High	Master Protein	Q9JHU4	Cytoplasmic dynein 1 heavy chain 1 [OS=Mus musculus]	0	145.954	10	36	62	36	4644	531.7	6.42	116.33	36	cell cycle OR cell proliferation;cell organization and biogenesis;transport;other biological processes	cytoskeleton;nucleus;other cell component	cytoskeletal activity;other molecular function	Pf03028, Pf08385, Pf08393, Pf12774, Pf12775, Pf12777, Pf12780, Pf12781, Pf17852, Pf18198, Pf18199	13424	ENSMUSG00000018707	Dync1h1	E9QM71; mmu:13424; Q9JHU4	MHC class II antigen presentation; Neutrophil degranulation; Separation of Sister Chromatids; Amplification of signal from unattached kinetochores via a MAD2 inhibitory signal; Resolution of Sister Chromatid Cohesion; RHO GTPases Activate Formins; EML4 and NUDC in mitotic spindle formation; HSP90 chaperone cycle for steroid hormone receptors (SHR) in the presence of ligand; COPI-mediated anterogr…		19	0	2.172	1
284	High	Master Protein	P17426	AP-2 complex subunit alpha-1 [OS=Mus musculus]	0	132.322	36	30	74	18	977	107.6	7.03	171.2	30	transport;other biological processes	plasma membrane;other membranes;other cell component	signal transduction activity or receptor binding;other molecular function	Pf01602, Pf02296, Pf02883	11771	ENSMUSG00000060279	Ap2a1	mmu:11771; P17426	MHC class II antigen presentation; Recycling pathway of L1; Cargo recognition for clathrin-mediated endocytosis; LDL clearance; Trafficking of GluR2-containing AMPA receptors; Retrograde neurotrophin signalling; WNT5A-dependent internalization of FZD4; WNT5A-dependent internalization of FZD2, FZD5 and ROR2; VLDLR internalisation and degradation	EGFR1 signaling pathway	11	8	2.171	1
285	High	Master Protein	P62874	Guanine nucleotide-binding protein G(I)/G(S)/G(T) subunit beta-1 [OS=Mus musculus]	0	144.407	51	15	86	8	340	37.4	6	248.67	15	cell cycle OR cell proliferation;stress response;developmental processes;signal transduction;other biological processes	plasma membrane;other membranes;other cell component	cytoskeletal activity;other molecular function	Pf00400	14688	ENSMUSG00000029064	Gnb1	mmu:14688; P04697; P04901; P62874	Presynaptic function of Kainate receptors; G alpha (i) signalling events; Extra-nuclear estrogen signaling; Thrombin signalling through proteinase activated receptors (PARs); ADP signalling through P2Y purinoceptor 1; GPER1 signaling; Olfactory Signaling Pathway; G alpha (q) signalling events; G alpha (12/13) signalling events; Ca2+ pathway; G beta:gamma signalling through PLC beta; ADP signallin…	Estrogen signaling; Chemokine signaling pathway; G protein signaling pathways; Focal adhesion: PI3K-Akt-mTOR signaling pathway; Myometrial relaxation and contraction pathways; Calcium regulation in cardiac cells	36	8	2.159	1
286	High	Master Protein	Q99LC3	NADH dehydrogenase [ubiquinone] 1 alpha subcomplex subunit 10, mitochondrial [OS=Mus musculus]	0	22.983	14	5	11	5	355	40.6	7.78	21.55	5	cell organization and biogenesis;other metabolic processes;transport	other membranes;mitochondrion;other cell component	transporter activity	Pf01712	67273	ENSMUSG00000026260	Ndufa10	mmu:67273; Q3UKK0; Q8BL57; Q99LC3; Q9CW21	Complex I biogenesis	Oxidative phosphorylation; Electron transport chain	4	0	2.158	1
287	High	Master Protein	P61027	Ras-related protein Rab-10 [OS=Mus musculus]	0	34.922	46	9	41	6	200	22.5	8.38	85.01	9	cell cycle OR cell proliferation;cell organization and biogenesis;transport;developmental processes;other biological processes	plasma membrane;other membranes;cytoskeleton;ER/Golgi;other cytoplasmic organelle;other cell component	cytoskeletal activity;other molecular function	Pf00071	19325	ENSMUSG00000020671	Rab10	mmu:19325; O88386; P61027; Q9D7X6	Neutrophil degranulation; RAB GEFs exchange GTP for GDP on RABs; RAB geranylgeranylation	Focal adhesion: PI3K-Akt-mTOR signaling pathway; Comprehensive IL-17A signaling	5	1	2.157	1
288	High	Master Protein	P62814	V-type proton ATPase subunit B, brain isoform [OS=Mus musculus]	0	119.657	43	19	65	19	511	56.5	5.81	175.98	19	cell organization and biogenesis;other metabolic processes;transport;other biological processes	plasma membrane;other membranes;cytosol;ER/Golgi;other cytoplasmic organelle;other cell component	transporter activity;other molecular function	Pf00006, Pf02874	11966	ENSMUSG00000006273	Atp6v1b2	mmu:11966; O09045; P50517; P62814; Q3TG74; Q3TL62; Q3TVK6; Q3TWR0; Q3U791; Q3U7C8; Q3U9Z0; Q3UAW7	Insulin receptor recycling; Amino acids regulate mTORC1; ROS and RNS production in phagocytes; Transferrin endocytosis and recycling; Ion channel transport		5	0	2.146	1
289	High	Master Protein	P02301	Histone H3.3C [OS=Mus musculus]	0	12.83	18	4	22	4	136	15.3	11.14	20.23	4	cell organization and biogenesis	nucleus;other cell component	nucleic acid binding activity;other molecular function	Pf00125			H3-5	P02301			0	0	2.143	1
290	High	Master Protein	P58252	Elongation factor 2 [OS=Mus musculus]	0	57.913	20	13	26	13	858	95.3	6.83	42.03	13	protein metabolism;other metabolic processes;other biological processes	plasma membrane;other membranes;cytosol;translational apparatus;other cell component	cytoskeletal activity;translation activity;nucleic acid binding activity;other molecular function	Pf00009, Pf00679, Pf03144, Pf03764, Pf14492	13629	ENSMUSG00000034994	Eef2	mmu:13629; P58252; Q544E4	Neutrophil degranulation; Protein methylation; Peptide chain elongation; Synthesis of diphthamide-EEF2	Translation factors	5	0	2.141	1
291	High	Master Protein	P08551	Neurofilament light polypeptide [OS=Mus musculus]	0	102.092	37	20	80	16	543	61.5	4.64	197.32	20	cell organization and biogenesis;stress response;transport;developmental processes;other biological processes	cytoskeleton;other cell component	cytoskeletal activity;other molecular function	Pf00038, Pf04732	18039	ENSMUSG00000022055	Nefl	mmu:18039; P08551; Q8K0Z0	RAF/MAP kinase cascade; Unblocking of NMDA receptors, glutamate binding and activation		2	4	2.138	1
292	High	Master Protein	P60766	Cell division control protein 42 homolog [OS=Mus musculus]	0	42.522	58	8	25	7	191	21.2	6.55	61.29	8	cell adhesion;cell organization and biogenesis;protein metabolism;other metabolic processes;stress response;transport;developmental processes;signal transduction;other biological processes	plasma membrane;other membranes;cytosol;cytoskeleton;ER/Golgi;other cytoplasmic organelle;other cell component	signal transduction activity or receptor binding;other molecular function	Pf00071	12540	ENSMUSG00000006699	Cdc42	A2A9U6; mmu:12540; P21181; P25763; P60766; Q3THZ7; Q3TJK6; Q545V0; Q6P201; Q8BQ51	EPHB-mediated forward signaling; Regulation of actin dynamics for phagocytic cup formation; RHOU GTPase cycle; RHOV GTPase cycle; RAC1 GTPase cycle; RHOQ GTPase cycle; RHOG GTPase cycle; RAC2 GTPase cycle; RAC3 GTPase cycle; RHO GTPases Activate Formins; RHO GTPases activate IQGAPs; VEGFA-VEGFR2 Pathway; RHO GTPases Activate WASPs and WAVEs; CDC42 GTPase cycle; Factors involved in megakaryocyte d…	Oxidative damage response; BDNF pathway; Chemokine signaling pathway; G13 signaling pathway; p38 Mapk signaling pathway; IL-3 signaling pathway; Mapk signaling pathway; Regulation of actin cytoskeleton; Comprehensive IL-17A signaling; EGFR1 signaling pathway; Integrin-mediated cell adhesion; Focal adhesion	36	0	2.136	1
293	High	Master Protein	Q3UPL0	Protein transport protein Sec31A [OS=Mus musculus]	0	13.162	4	4	11	4	1230	133.5	6.76	12.39	4	cell organization and biogenesis;transport;other biological processes	other membranes;cytosol;ER/Golgi;other cytoplasmic organelle;other cell component	other molecular function	Pf12931	69162	ENSMUSG00000035325	Sec31a	mmu:69162; Q3UPL0; Q3UYH3; Q6IQZ3; Q7TQJ7; Q811J4	MHC class II antigen presentation; Antigen Presentation: Folding, assembly and peptide loading of class I MHC; COPII-mediated vesicle transport		3	0	2.135	1
294	High	Master Protein	P62821	Ras-related protein Rab-1A [OS=Mus musculus]	0	41.918	58	9	37	5	205	22.7	6.21	66.78	9	cell adhesion;cell-cell signaling;cell organization and biogenesis;other metabolic processes;stress response;transport;other biological processes	other membranes;cytosol;ER/Golgi;other cytoplasmic organelle;other cell component	other molecular function	Pf00071	19324	ENSMUSG00000020149	Rab1A	mmu:19324; P11476; P62821; Q3TX44; Q811M4; Q96N61; Q9Y3T2	COPII-mediated vesicle transport; COPI-dependent Golgi-to-ER retrograde traffic; COPI-mediated anterograde transport; RAB GEFs exchange GTP for GDP on RABs; RAB geranylgeranylation; Golgi Cisternae Pericentriolar Stack Reorganization		6	2	2.134	1
295	High	Master Protein	P09411	Phosphoglycerate kinase 1 [OS=Mus musculus]	0	89.243	59	17	49	17	417	44.5	7.9	118.23	17	protein metabolism;other metabolic processes;stress response;other biological processes	non-structural extracellular;other membranes;cytosol;other cell component	kinase activity;other molecular function	Pf00162	18655	ENSMUSG00000062070	Pgk1	mmu:18655; P09411; Q3TPE6; Q3UKV8; Q5XJE7	Gluconeogenesis; Glycolysis	Glycolysis and gluconeogenesis	3	0	2.133	1
296	High	Master Protein	Q8BK64	Activator of 90 kDa heat shock protein ATPase homolog 1 [OS=Mus musculus]	0	14.272	14	4	6	4	338	38.1	5.53	6.26	4	other biological processes	cytosol;ER/Golgi;other cell component	other molecular function	Pf08327, Pf09229	217737	ENSMUSG00000021037	Ahsa1	mmu:217737; Q8BK64; Q8R3E6			0	0	2.128	1
297	High	Master Protein	Q60930	Voltage-dependent anion-selective channel protein 2 [OS=Mus musculus]	0	75.684	50	12	54	12	295	31.7	7.49	147.84	12	cell organization and biogenesis;transport;signal transduction;other biological processes	other membranes;cytoskeleton;mitochondrion;ER/Golgi;other cell component	transporter activity;other molecular function	Pf01459	22334	ENSMUSG00000021771	Vdac2	mmu:22334; Q60930; Q78MH6; Q99L98	Ub-specific processing proteases		1	0	2.128	1
298	High	Master Protein	O55143	Sarcoplasmic/endoplasmic reticulum calcium ATPase 2 [OS=Mus musculus]	0	134.581	25	21	49	21	1044	114.8	5.34	112.54	21	cell organization and biogenesis;other metabolic processes;stress response;transport;signal transduction;other biological processes	plasma membrane;other membranes;cytosol;ER/Golgi;other cell component	signal transduction activity or receptor binding;transporter activity;other molecular function	Pf00122, Pf00689, Pf00690, Pf08282, Pf13246	11938	ENSMUSG00000029467	Atp2a2	mmu:11938; O55143; Q9R2A9; Q9WUT5	Ion homeostasis; Ion transport by P-type ATPases; Reduction of cytosolic Ca++ levels	Alzheimer's disease; Myometrial relaxation and contraction pathways; Calcium regulation in cardiac cells	6	0	2.123	1
299	High	Master Protein	P47757	F-actin-capping protein subunit beta [OS=Mus musculus]	0	45.259	38	8	21	8	277	31.3	5.74	59.29	8	cell organization and biogenesis;other biological processes	other membranes;cytosol;cytoskeleton;other cell component	cytoskeletal activity	Pf01115	12345	ENSMUSG00000028745	Capzb	A2AMV7; mmu:12345; P47757	Factors involved in megakaryocyte development and platelet production; MHC class II antigen presentation; COPI-mediated anterograde transport; HSP90 chaperone cycle for steroid hormone receptors (SHR) in the presence of ligand; COPI-independent Golgi-to-ER retrograde traffic; RHOF GTPase cycle; RHOD GTPase cycle		7	0	2.122	1
300	High	Master Protein	Q8BH66	Atlastin-1 [OS=Mus musculus]	0	23.452	9	6	13	5	558	63.3	6.49	24.58	6	cell organization and biogenesis;developmental processes	other membranes;ER/Golgi;other cell component	other molecular function	Pf02263	73991	ENSMUSG00000021066	Atl1	mmu:73991; Q8BH66; Q8BJH5			0	1	2.12	1
301	High	Master Protein	P35486	Pyruvate dehydrogenase E1 component subunit alpha, somatic form, mitochondrial [OS=Mus musculus]	0	68.662	40	15	53	15	390	43.2	8.19	92.39	15	other metabolic processes	mitochondrion;nucleus;other cell component	other molecular function	Pf00676	18597	ENSMUSG00000031299	Pdha1	mmu:18597; P35486	Glyoxylate metabolism and glycine degradation; Regulation of pyruvate dehydrogenase (PDH) complex; Signaling by Retinoic Acid	Glycolysis and gluconeogenesis; Acetylcholine synthesis; TCA cycle; Amino acid metabolism	8	0	2.113	1
302	High	Master Protein	Q9Z1G4	V-type proton ATPase 116 kDa subunit a 1 [OS=Mus musculus]	0	108.157	24	18	75	18	839	96.4	6.76	198.28	18	cell organization and biogenesis;transport;other biological processes	plasma membrane;other membranes;cytosol;ER/Golgi;nucleus;other cytoplasmic organelle;other cell component	transporter activity;other molecular function	Pf01496	11975	ENSMUSG00000019302	Atp6v0a1	A2A5A1; mmu:11975; Q9JHJ4; Q9JL13; Q9JL14; Q9Z1G4	Neutrophil degranulation; Insulin receptor recycling; ROS and RNS production in phagocytes; Transferrin endocytosis and recycling; Ion channel transport		5	0	2.11	1
303	High	Master Protein	P97427	Dihydropyrimidinase-related protein 1 [OS=Mus musculus]	0	142.9	50	24	94	19	572	62.1	7.12	242.89	24	signal transduction;other biological processes	cytosol;cytoskeleton;nucleus;other cell component	cytoskeletal activity;other molecular function	Pf01979	12933	ENSMUSG00000029121	Crmp1	mmu:12933; O08554; O35097; P97427	CRMPs in Sema3A signaling		1	5	2.104	1
304	High	Master Protein	P63318	Protein kinase C gamma type [OS=Mus musculus]	0	111.249	38	20	57	19	697	78.3	7.46	138.02	20	cell-cell signaling;protein metabolism;other metabolic processes;stress response;developmental processes;signal transduction;other biological processes	plasma membrane;other membranes;cytosol;nucleus;other cell component	kinase activity;other molecular function	Pf00069, Pf00130, Pf00168, Pf00433	18752	ENSMUSG00000078816	Prkcg	mmu:18752; P05697; P63318	Trafficking of GluR2-containing AMPA receptors; WNT5A-dependent internalization of FZD4; Calmodulin induced events; Disinhibition of SNARE formation	Mechanisms associated with pluripotency; G protein signaling pathways; Myometrial relaxation and contraction pathways; Wnt signaling pathway; Mapk signaling pathway; Calcium regulation in cardiac cells; Wnt signaling pathway and pluripotency	12	1	2.101	1
305	High	Master Protein	Q922Q1	Mitochondrial amidoxime reducing component 2 [OS=Mus musculus]	0	9.628	9	4	6	4	338	38.2	8.68	0	4	other metabolic processes;stress response	other membranes;mitochondrion;other cytoplasmic organelle	other molecular function	Pf03473, Pf03476	67247	ENSMUSG00000073481	Mtarc2	mmu:67247; Q922Q1	Phase I - Functionalization of compounds		1	0	2.099	1
306	High	Master Protein	Q91YT0	NADH dehydrogenase [ubiquinone] flavoprotein 1, mitochondrial [OS=Mus musculus]	0	27.346	17	6	13	6	464	50.8	8.21	30.09	6	other metabolic processes;transport	other membranes;cytosol;mitochondrion	transporter activity;other molecular function	Pf01512, Pf10531, Pf10589	17995	ENSMUSG00000037916	Ndufv1	mmu:17995; Q91YT0	Complex I biogenesis	Oxidative phosphorylation; Electron transport chain	4	0	2.098	1
307	High	Master Protein	P68040	Receptor of activated protein C kinase 1 [OS=Mus musculus]	0	28.856	21	7	16	7	317	35.1	7.69	29.16	7	cell cycle OR cell proliferation;protein metabolism;other metabolic processes;developmental processes;signal transduction;other biological processes	plasma membrane;cytosol;mitochondrion;translational apparatus;nucleus;other cell component	signal transduction activity or receptor binding;enzyme regulator activity;translation activity;other molecular function	Pf00400	14694	ENSMUSG00000020372	Rack1	mmu:14694; P25388; P68040; P99049; Q3THP0; Q3THY7; Q3TKQ0; Q3TW88; Q5NCC5; Q5NCC6; Q9CSQ0; Q9ERM6	Regulation of TNFR1 signaling; TNFR1-induced NF-kappa-B signaling pathway; TNFR1-mediated ceramide production	IL-3 signaling pathway; IL-2 signaling pathway	5	0	2.089	1
308	High	Master Protein	Q9DBJ1	Phosphoglycerate mutase 1 [OS=Mus musculus]	0	15.019	18	4	8	4	254	28.8	7.18	12.64	4	other metabolic processes	cytosol;cytoskeleton;nucleus;other cell component	other molecular function	Pf00300	18648	ENSMUSG00000011752	Pgam1	mmu:18648; Q9D6W0; Q9DBJ1; Q9ERT3	Neutrophil degranulation; Gluconeogenesis; Glycolysis	Glycolysis and gluconeogenesis	4	0	2.088	1
309	High	Master Protein	Q8BVI4	Dihydropteridine reductase [OS=Mus musculus]	0	24.374	31	7	13	7	241	25.6	7.81	25.12	7	other metabolic processes;developmental processes;other biological processes	cytosol;other cell component	other molecular function	Pf00106	110391	ENSMUSG00000015806	Qdpr	mmu:110391; Q3TT09; Q8BVI4; Q9D0K4	Phenylalanine metabolism		1	0	2.077	1
310	High	Master Protein	Q9Z1S5	Neuronal-specific septin-3 [OS=Mus musculus]	0	11.245	11	4	7	4	350	40	6.81	19.08	4	cell cycle OR cell proliferation	plasma membrane;other membranes;cytosol;cytoskeleton;other cell component	other molecular function	Pf00735	24050	ENSMUSG00000022456	Septin3	mmu:24050; Q3TNZ2; Q7TNT7; Q9Z1S5			0	0	2.068	1
311	High	Master Protein	P62880	Guanine nucleotide-binding protein G(I)/G(S)/G(T) subunit beta-2 [OS=Mus musculus]	0	142.713	48	14	88	6	340	37.3	6	264.01	14	signal transduction;other biological processes	plasma membrane;other membranes;other cell component	other molecular function	Pf00400	14693	ENSMUSG00000029713	Gnb2	mmu:14693; P11016; P54312; P62880	G alpha (i) signalling events; ADP signalling through P2Y purinoceptor 12; Adrenaline,noradrenaline inhibits insulin secretion; Extra-nuclear estrogen signaling; Glucagon-like Peptide-1 (GLP1) regulates insulin secretion; G alpha (z) signalling events; G alpha (q) signalling events; G alpha (12/13) signalling events; Ca2+ pathway; G beta:gamma signalling through PLC beta; Presynaptic function of …	Chemokine signaling pathway; G protein signaling pathways; Focal adhesion: PI3K-Akt-mTOR signaling pathway; Myometrial relaxation and contraction pathways; Calcium regulation in cardiac cells	31	1	2.068	1
312	High	Master Protein	P06151	L-lactate dehydrogenase A chain [OS=Mus musculus]	0	63.995	32	11	41	10	332	36.5	7.74	93.72	11	other metabolic processes;other biological processes	cytosol;cytoskeleton;other cell component	other molecular function	Pf00056, Pf02866	16828	ENSMUSG00000063229	Ldha	mmu:16828; P06151	Pyruvate metabolism	Glycolysis and gluconeogenesis	2	0	2.064	1
313	High	Master Protein	P51863	V-type proton ATPase subunit d 1 [OS=Mus musculus]	0	20.78	17	5	15	5	351	40.3	5	16.87	5	cell organization and biogenesis;transport;developmental processes;other biological processes	plasma membrane;other membranes;cytoskeleton;ER/Golgi;other cytoplasmic organelle;other cell component	transporter activity;other molecular function	Pf01992	11972	ENSMUSG00000013160	Atp6v0d1	mmu:11972; P51863; Q54A57; Q9QWJ2	Insulin receptor recycling; Amino acids regulate mTORC1; ROS and RNS production in phagocytes; Transferrin endocytosis and recycling; Ion channel transport		5	0	2.063	1
314	High	Master Protein	P63011	Ras-related protein Rab-3A [OS=Mus musculus]	0	119.887	63	13	86	8	220	25	5.03	243.15	13	cell-cell signaling;cell organization and biogenesis;stress response;transport;developmental processes;other biological processes	plasma membrane;other membranes;cytosol;ER/Golgi;other cytoplasmic organelle;other cell component	cytoskeletal activity;other molecular function	Pf00071	19339	ENSMUSG00000031840	Rab3a	mmu:19339; P05713; P63011; Q3TSL4	Dopamine Neurotransmitter Release Cycle; Serotonin Neurotransmitter Release Cycle; Norepinephrine Neurotransmitter Release Cycle; Glutamate Neurotransmitter Release Cycle; Acetylcholine Neurotransmitter Release Cycle; GABA synthesis, release, reuptake and degradation; Neutrophil degranulation; RAB GEFs exchange GTP for GDP on RABs; RAB geranylgeranylation		9	5	2.063	1
315	High	Master Protein	P31650	Sodium- and chloride-dependent GABA transporter 3 [OS=Mus musculus]	0	19.875	8	4	12	4	627	69.9	6.98	35.44	4	transport;developmental processes;other biological processes	plasma membrane;other membranes;other cell component	transporter activity;other molecular function	Pf00209	243616	ENSMUSG00000030307	Slc6a11	mmu:243616; P31650; Q8BWA7	Na+/Cl- dependent neurotransmitter transporters; Creatine metabolism; Reuptake of GABA		3	0	2.062	1
316	High	Master Protein	Q8BVE3	V-type proton ATPase subunit H [OS=Mus musculus]	0	76.369	36	13	38	13	483	55.8	6.61	68.02	13	cell organization and biogenesis;transport	other membranes;ER/Golgi;other cytoplasmic organelle;other cell component	transporter activity	Pf03224, Pf11698	108664	ENSMUSG00000033793	Atp6v1h	mmu:108664; Q8BVE3; Q921X8	Insulin receptor recycling; Amino acids regulate mTORC1; ROS and RNS production in phagocytes; Transferrin endocytosis and recycling; Ion channel transport		5	0	2.061	1
317	High	Master Protein	Q9DCN2	NADH-cytochrome b5 reductase 3 [OS=Mus musculus]	0	14.282	10	4	12	4	301	34.1	8.38	11.12	4	other metabolic processes	other membranes;cytosol;mitochondrion;ER/Golgi;other cell component	other molecular function	Pf00175, Pf00970	109754	ENSMUSG00000018042	Cyb5r3	mmu:109754; Q9DCN2	Neutrophil degranulation; Phase I - Functionalization of compounds; Vitamin C (ascorbate) metabolism	Oxidation by cytochrome P450	4	0	2.058	1
318	High	Master Protein	O88507	Ciliary neurotrophic factor receptor subunit alpha [OS=Mus musculus]	0	44.979	21	6	32	6	372	40.8	6.83	99.66	6	signal transduction;other biological processes	non-structural extracellular;plasma membrane;other membranes	signal transduction activity or receptor binding;other molecular function	Pf00041	12804	ENSMUSG00000028444	Cntfr	mmu:12804; O88507; Q80T01	IL-6-type cytokine receptor ligand interactions	Delta-Notch signaling pathway; Adipogenesis genes	3	0	2.057	1
319	High	Master Protein	P70202	Latexin [OS=Mus musculus]	0	24.075	20	4	12	4	222	25.5	5.74	29.95	4	stress response;other biological processes	non-structural extracellular;other cell component	enzyme regulator activity;other molecular function	Pf06907	17035	ENSMUSG00000047557	Lxn	mmu:17035; P70202; Q3UDQ0; Q8CCS8			0	0	2.052	1
320	High	Master Protein	Q3TXX4	Vesicular glutamate transporter 1 [OS=Mus musculus]	0	40.565	11	7	35	6	560	61.6	7.34	57.9	7	cell-cell signaling;cell organization and biogenesis;transport;signal transduction;other biological processes	plasma membrane;other membranes;ER/Golgi;other cell component	transporter activity	Pf07690	72961	ENSMUSG00000070570	Slc17a7	E9QMT8; mmu:72961; Q3TXX4	Glutamate Neurotransmitter Release Cycle; Organic anion transporters		2	1	2.052	1
321	High	Master Protein	Q6P1F6	Serine/threonine-protein phosphatase 2A 55 kDa regulatory subunit B alpha isoform [OS=Mus musculus]	0	62.899	33	11	29	11	447	51.7	6.2	78.94	11	protein metabolism;other metabolic processes;other biological processes	cytosol;other cell component	enzyme regulator activity;cytoskeletal activity;other molecular function		71978	ENSMUSG00000022052	Ppp2r2a	mmu:71978; Q6P1F6	Nonsense Mediated Decay (NMD) enhanced by the Exon Junction Complex (EJC); Cyclin A/B1/B2 associated events during G2/M transition; Initiation of Nuclear Envelope (NE) Reformation; Cyclin D associated events in G1	Glycogen metabolism; IL-6 signaling pathway; Wnt signaling pathway and pluripotency	7	0	2.051	1
322	High	Master Protein	P17710	Hexokinase-1 [OS=Mus musculus]	0	150.759	36	28	89	28	974	108.2	6.8	211.23	28	protein metabolism;other metabolic processes;stress response;other biological processes	plasma membrane;other membranes;cytosol;mitochondrion;other cell component	kinase activity;other molecular function	Pf00349, Pf03727	15275	ENSMUSG00000037012	Hk1	E9PXQ3; P17710; Q61659; Q64476; Q64479		Glucuronidation; Glycolysis and gluconeogenesis	2	0	2.051	1
323	High	Master Protein	P62281	40S ribosomal protein S11 [OS=Mus musculus]	0	25.055	46	7	20	7	158	18.4	10.3	22.26	7	protein metabolism;other metabolic processes;other biological processes	cytosol;translational apparatus;nucleus;other cell component	nucleic acid binding activity;other molecular function	Pf00366, Pf16205	27207	ENSMUSG00000003429	Rps11	mmu:27207; P04643; P62281	L13a-mediated translational silencing of Ceruloplasmin expression; GTP hydrolysis and joining of the 60S ribosomal subunit; Translation initiation complex formation; Ribosomal scanning and start codon recognition; SRP-dependent cotranslational protein targeting to membrane; Major pathway of rRNA processing in the nucleolus and cytosol; Formation of a pool of free 40S subunits; Nonsense Mediated D…	Cytoplasmic ribosomal proteins; mRNA processing	12	0	2.05	1
324	High	Master Protein	P70211	Netrin receptor DCC [OS=Mus musculus]	0	57.087	13	14	35	14	1447	158.2	6.73	57.7	14	cell adhesion;cell organization and biogenesis;RNA metabolism OR transcription;developmental processes;signal transduction;other biological processes	plasma membrane;other membranes;other cell component	other molecular function	Pf00041, Pf06583, Pf07679	13176	ENSMUSG00000060534	Dcc	G3X9X6; mmu:13176; P70211	DCC mediated attractive signaling; Caspase activation via Dependence Receptors in the absence of ligand		3	0	2.05	1
325	High	Master Protein	Q9R0Q6	Actin-related protein 2/3 complex subunit 1A [OS=Mus musculus]	0	48.575	38	10	24	9	370	41.6	8.18	54.17	10	cell organization and biogenesis	plasma membrane;other membranes;cytoskeleton;nucleus;other cell component	cytoskeletal activity	Pf00400	56443	ENSMUSG00000029621	Arpc1a	mmu:56443; Q3UL75; Q9R0Q6	Regulation of actin dynamics for phagocytic cup formation; Clathrin-mediated endocytosis; EPHB-mediated forward signaling; RHO GTPases Activate WASPs and WAVEs		4	0	2.049	1
326	High	Master Protein	P17427	AP-2 complex subunit alpha-2 [OS=Mus musculus]	0	129.562	32	26	71	14	938	104	6.93	169.95	26	transport;other biological processes	plasma membrane;other membranes;ER/Golgi;other cell component	other molecular function	Pf01602, Pf02296, Pf02883	11772	ENSMUSG00000002957	Ap2a2	mmu:11772; P17427; Q8C2J5; Q921V0	Neutrophil degranulation; MHC class II antigen presentation; Recycling pathway of L1; Cargo recognition for clathrin-mediated endocytosis; LDL clearance; Trafficking of GluR2-containing AMPA receptors; Retrograde neurotrophin signalling; WNT5A-dependent internalization of FZD4; WNT5A-dependent internalization of FZD2, FZD5 and ROR2; VLDLR internalisation and degradation		11	0	2.046	1
327	High	Master Protein	P50516	V-type proton ATPase catalytic subunit A [OS=Mus musculus]	0	121.147	45	23	74	23	617	68.3	5.58	179.36	23	cell organization and biogenesis;other metabolic processes;transport;other biological processes	plasma membrane;other membranes;cytosol;ER/Golgi;nucleus;other cytoplasmic organelle;other cell component	transporter activity;other molecular function	Pf00006, Pf02874, Pf16886	11964	ENSMUSG00000052459	Atp6v1a	mmu:11964; P50516; Q3TKS0; Q3U5W3; Q3U777; Q3UDZ9; Q3US31; Q8CHX2	Insulin receptor recycling; Amino acids regulate mTORC1; ROS and RNS production in phagocytes; Transferrin endocytosis and recycling; Ion channel transport		5	0	2.045	1
328	High	Master Protein	P84078	ADP-ribosylation factor 1 [OS=Mus musculus]	0	116.106	81	11	52	7	181	20.7	6.8	162.68	11	cell cycle OR cell proliferation;cell organization and biogenesis;transport;other biological processes	plasma membrane;other membranes;cytosol;cytoskeleton;ER/Golgi;other cytoplasmic organelle;other cell component	enzyme regulator activity;other molecular function	Pf00025	11840	ENSMUSG00000048076	Arf1	mmu:11840; P10947; P32889; P84078; Q3THZ2; Q3U849; Q3UDG1; Q3UF76	COPI-dependent Golgi-to-ER retrograde traffic; MHC class II antigen presentation; COPI-mediated anterograde transport; Golgi Associated Vesicle Biogenesis; Synthesis of PIPs at the Golgi membrane; Intra-Golgi traffic; Synthesis of PIPs at the plasma membrane; Lysosome Vesicle Biogenesis	Novel Jun-Dmp1 pathway; Insulin signaling	11	5	2.042	1
329	High	Master Protein	Q8K0T0	Reticulon-1 [OS=Mus musculus]	0	17.964	10	5	12	5	780	83.5	4.58	21.82	5	cell organization and biogenesis;developmental processes;other biological processes	other membranes;ER/Golgi;other cell component		Pf02453	104001	ENSMUSG00000021087	Rtn1	mmu:104001; Q8K0T0; Q8K4S4			0	0	2.038	1
330	High	Master Protein	P61922	4-aminobutyrate aminotransferase, mitochondrial [OS=Mus musculus]	0	67.383	42	13	27	13	500	56.4	8.09	67.67	13	other metabolic processes;stress response;developmental processes;other biological processes	mitochondrion;other cell component	other molecular function	Pf00202	268860	ENSMUSG00000057880	Abat	mmu:268860; P61922; Q8BZA3	Degradation of GABA	Alanine and aspartate metabolism	2	0	2.038	1
331	High	Master Protein	Q9Z204	Heterogeneous nuclear ribonucleoproteins C1/C2 [OS=Mus musculus]	0	7.743	13	4	8	4	313	34.4	5.05	5.76	4	RNA metabolism OR transcription;other metabolic processes;other biological processes	cytosol;cytoskeleton;nucleus;other cell component	enzyme regulator activity;nucleic acid binding activity;other molecular function	Pf00076	15381	ENSMUSG00000060373	Hnrnpc	mmu:15381; Q3TLB5; Q501Q3; Q8C2G5; Q99KE2; Q9CQT3; Q9CY83; Q9Z204	mRNA Splicing - Major Pathway; Processing of Capped Intron-Containing Pre-mRNA; SUMOylation of RNA binding proteins; RHOBTB1 GTPase cycle; RHOBTB2 GTPase cycle	mRNA processing	6	0	2.037	1
332	High	Master Protein	P35803	Neuronal membrane glycoprotein M6-b [OS=Mus musculus]	0	27.57	19	5	21	5	328	36.2	6.14	39.62	5	cell organization and biogenesis;transport;developmental processes;other biological processes	plasma membrane;other membranes;other cell component	other molecular function	Pf01275	14758	ENSMUSG00000031342	Gpm6b	A2AEG4; mmu:14758; P35803; Q8R3J6; Q99L14; Q9D4F5; Q9JHG9; Q9JHI1; Q9JHK2; Q9JI62; Q9JI63; Q9JI64; Q9JI65			0	0	2.036	1
333	High	Master Protein	P05064	Fructose-bisphosphate aldolase A [OS=Mus musculus]	0	148.174	76	25	84	23	364	39.3	8.09	210.76	25	cell organization and biogenesis;other metabolic processes;other biological processes	non-structural extracellular;plasma membrane;other membranes;cytosol;cytoskeleton;mitochondrion;other cell component	cytoskeletal activity;other molecular function	Pf00274	11674	ENSMUSG00000030695	Aldoa	mmu:11674; P05064	Neutrophil degranulation; Platelet degranulation ; Gluconeogenesis; Glycolysis	Glycolysis and gluconeogenesis	5	2	2.032	1
334	High	Master Protein	P62482	Voltage-gated potassium channel subunit beta-2 [OS=Mus musculus]	0	19.994	17	6	12	4	367	41	9	35.51	6	other metabolic processes;transport;other biological processes	plasma membrane;other membranes;cytosol;cytoskeleton;other cell component	transporter activity;other molecular function	Pf00248	16498	ENSMUSG00000028931	Kcnab2	mmu:16498; P62482; P97381; Q60942; Q64284	Neutrophil degranulation; Voltage gated Potassium channels	Metapathway biotransformation	3	2	2.027	1
335	High	Master Protein	P62881	Guanine nucleotide-binding protein subunit beta-5 [OS=Mus musculus]	0	45.765	21	7	17	7	395	43.5	6.46	57.04	7	signal transduction;other biological processes	plasma membrane;other membranes;cytosol;nucleus;other cell component	enzyme regulator activity;other molecular function	Pf00400	14697	ENSMUSG00000032192	Gnb5	mmu:14697; O35354; P54314; P62881; Q91WB3	G alpha (z) signalling events; G alpha (q) signalling events; Thromboxane signalling through TP receptor; Thrombin signalling through proteinase activated receptors (PARs); G-protein activation; Cooperation of PDCL (PhLP1) and TRiC/CCT in G-protein beta folding; ADP signalling through P2Y purinoceptor 1; G alpha (i) signalling events; Ca2+ pathway; G alpha (12/13) signalling events; G beta:gamma …	Chemokine signaling pathway; G protein signaling pathways; Myometrial relaxation and contraction pathways; Calcium regulation in cardiac cells	31	0	2.027	1
336	High	Master Protein	P47857	ATP-dependent 6-phosphofructokinase, muscle type [OS=Mus musculus]	0	112.585	31	19	58	16	780	85.2	8	145.05	19	other metabolic processes;other biological processes	plasma membrane;other membranes;cytosol;cytoskeleton;nucleus	kinase activity;other molecular function	Pf00365	18642	ENSMUSG00000033065	Pfkm	C8CMN5; C8CMN6; C8CMN7; mmu:18642; O35513; P47857; Q543L1; Q9JK94	Glycolysis	Glycolysis and gluconeogenesis; Insulin signaling	3	2	2.027	1
337	High	Master Protein	Q8CHH9	Septin-8 [OS=Mus musculus]	0	58.084	38	12	42	9	429	49.8	6	85.16	12	cell cycle OR cell proliferation;other biological processes	other membranes;cytoskeleton;ER/Golgi;other cell component	other molecular function	Pf00735	20362	ENSMUSG00000018398	Septin8	B1AQY7; mmu:20362; Q80YC7; Q8CHH9; Q9ESF7			0	0	2.024	1
338	High	Master Protein	Q8BPN8	DmX-like protein 2 [OS=Mus musculus]	0	41.82	3	7	15	7	3032	338	6.42	35.14	7	cell-cell signaling;developmental processes;other biological processes	other membranes;ER/Golgi;other cell component	other molecular function	Pf00400, Pf12234	235380	ENSMUSG00000041268	Dmxl2	B0V2P4; Q3TNY5; Q69ZX5; Q8BPN8; Q8CCU3			0	0	2.023	1
339	High	Master Protein	Q3U0V1	Far upstream element-binding protein 2 [OS=Mus musculus]	0	17.39	10	5	5	5	748	76.7	7.33	7.04	5	RNA metabolism OR transcription;other metabolic processes;transport;other biological processes	cytosol;nucleus;other cell component	nucleic acid binding activity;other molecular function	Pf00013, Pf09005	16549	ENSMUSG00000007670	Khsrp	E9QKH3; mmu:16549; Q2VPQ6; Q3U0V1; Q6P2L2	KSRP (KHSRP) binds and destabilizes mRNA		1	0	2.022	1
340	High	Master Protein	P08553	Neurofilament medium polypeptide [OS=Mus musculus]	0	84.216	18	13	40	9	848	95.9	4.77	95.86	13	cell organization and biogenesis;transport	cytoskeleton;other cell component	signal transduction activity or receptor binding;cytoskeletal activity;other molecular function	Pf00038, Pf04732	18040		Nefm	A2VCT5; mmu:18040; P08553; Q0VDM8; Q3HRJ6; Q3TNS4; Q3TPK2; Q61961; Q8BQ20			0	0	2.02	1
341	High	Master Protein	Q99KI0	Aconitate hydratase, mitochondrial [OS=Mus musculus]	0	180.419	40	26	104	26	780	85.4	7.93	267.99	26	other metabolic processes;stress response;developmental processes	cytosol;mitochondrion	other molecular function	Pf00330, Pf00694	11429	ENSMUSG00000022477	Aco2	mmu:11429; Q3UDK9; Q3ULG9; Q3UNH7; Q505P4; Q99KI0	Citric acid cycle (TCA cycle)	TCA cycle	2	0	2.02	1
342	High	Master Protein	Q9D6M3	Mitochondrial glutamate carrier 1 [OS=Mus musculus]	0	42.396	28	9	37	9	323	34.6	9.09	75.51	9	other metabolic processes;transport;other biological processes	other membranes;mitochondrion	transporter activity	Pf00153	68267	ENSMUSG00000019082	Slc25a22	mmu:68267; Q3TRY1; Q9D6M3	Organic anion transporters		1	0	2.015	1
343	High	Master Protein	Q3UMR5	Calcium uniporter protein, mitochondrial [OS=Mus musculus]	0	24.176	18	5	13	5	350	39.7	8.56	31.41	5	cell organization and biogenesis;transport;signal transduction;other biological processes	other membranes;mitochondrion	transporter activity;other molecular function	Pf04678	215999	ENSMUSG00000009647	Mcu	B2RTD1; mmu:215999; Q3TTK3; Q3UMR5	Processing of SMDT1		2	0	2.012	1
344	High	Master Protein	Q9CQQ7	ATP synthase F(0) complex subunit B1, mitochondrial [OS=Mus musculus]	0	31.927	29	8	22	8	256	28.9	9.06	34.77	8	other metabolic processes;transport	other membranes;mitochondrion	transporter activity;other molecular function	Pf05405	11950	ENSMUSG00000000563	Atp5pb	mmu:11950; Q9CQQ7	Formation of ATP by chemiosmotic coupling; Cristae formation	Oxidative phosphorylation; Electron transport chain	4	0	2.011	1
345	High	Master Protein	P60202	Myelin proteolipid protein [OS=Mus musculus]	0	43.336	26	7	72	7	277	30.1	8.35	149.62	7	cell organization and biogenesis;other metabolic processes;stress response;developmental processes;signal transduction;other biological processes	plasma membrane;other membranes;other cell component	other molecular function	Pf01275	18823	ENSMUSG00000031425	Plp1	mmu:18823; P04400; P06905; P60202; Q9WUS9			0	0	2.002	1
346	High	Master Protein	P50396	Rab GDP dissociation inhibitor alpha [OS=Mus musculus]	0	132.203	51	19	75	13	447	50.5	5.08	236.31	19	cell organization and biogenesis;transport;signal transduction;other biological processes	cytosol;ER/Golgi;other cell component	enzyme regulator activity;other molecular function	Pf00996	14567	ENSMUSG00000015291	Gdi1	A2AMA8; mmu:14567; P50396; Q3TBI9; Q8VHM3; Q91Y71; Q91Z41; Q96CX5	RAB GEFs exchange GTP for GDP on RABs		1	6	2.001	1
347	High	Master Protein	P08249	Malate dehydrogenase, mitochondrial [OS=Mus musculus]	0	92.261	50	13	62	13	338	35.6	8.68	184.09	13	other metabolic processes	other membranes;mitochondrion;other cell component	other molecular function	Pf00056, Pf02866	17448	ENSMUSG00000019179	Mdh2	mmu:17448; P08249; Q0QF44; Q8CF79; Q8R1P0	Gluconeogenesis; Citric acid cycle (TCA cycle)	Glycolysis and gluconeogenesis; TCA cycle	4	0	2	1
348	High	Master Protein	Q8K2B3	Succinate dehydrogenase [ubiquinone] flavoprotein subunit, mitochondrial [OS=Mus musculus]	0	147.922	42	22	80	22	664	72.5	7.37	199.41	22	other metabolic processes;developmental processes	other membranes;mitochondrion;nucleus	other molecular function	Pf00890, Pf02910	66945	ENSMUSG00000021577	Sdha	mmu:66945; Q0QF19; Q3UH25; Q3UKP7; Q3V4B1; Q8K2B3; Q921P5; Q9Z1Z4	Citric acid cycle (TCA cycle)	Electron transport chain; TCA cycle	3	0	1.997	1
349	High	Master Protein	Q91V12	Cytosolic acyl coenzyme A thioester hydrolase [OS=Mus musculus]	0	57.076	28	9	24	9	381	42.5	8.68	72.08	9	other metabolic processes	cytosol;mitochondrion;nucleus;other cell component	other molecular function	Pf03061	70025	ENSMUSG00000028937	Acot7	A2A8K9; A2A8L0; A2A8L2; mmu:70025; Q3U8C6; Q59HQ2; Q91V12	Mitochondrial Fatty Acid Beta-Oxidation		1	0	1.994	1
350	High	Master Protein	Q9DB77	Cytochrome b-c1 complex subunit 2, mitochondrial [OS=Mus musculus]	0	66.752	28	12	34	12	453	48.2	9.25	81.28	12	protein metabolism;other metabolic processes;other biological processes	other membranes;mitochondrion;nucleus	other molecular function	Pf00675, Pf05193	67003	ENSMUSG00000030884	Uqcrc2	mmu:67003; Q8BK11; Q9CVK7; Q9DB77	Respiratory electron transport	Electron transport chain	2	0	1.99	1
351	High	Master Protein	Q7TPR4	Alpha-actinin-1 [OS=Mus musculus]	0	33.966	11	8	16	8	892	103	5.38	27.06	8	cell adhesion;cell organization and biogenesis;RNA metabolism OR transcription;other biological processes	plasma membrane;other membranes;cytoskeleton;nucleus;other cell component	signal transduction activity or receptor binding;cytoskeletal activity;nucleic acid binding activity;other molecular function	Pf00307, Pf00435, Pf08726	109711	ENSMUSG00000015143	Actn1	mmu:109711; Q7TPR4	Platelet degranulation ; RHOF GTPase cycle; RHOD GTPase cycle; Regulation of cytoskeletal remodeling and cell spreading by IPP complex components; RHOBTB2 GTPase cycle	Regulation of actin cytoskeleton; Integrin-mediated cell adhesion; Focal adhesion	8	0	1.989	1
352	High	Master Protein	Q64133	Amine oxidase [flavin-containing] A [OS=Mus musculus]	0	21.864	10	5	8	4	526	59.6	7.81	16.26	5	other metabolic processes;other biological processes	other membranes;cytosol;mitochondrion	other molecular function	Pf01593	17161	ENSMUSG00000025037	Maoa	B1AX52; mmu:17161; Q64133; Q8K0Z8	Enzymatic degradation of dopamine by COMT; Norepinephrine Neurotransmitter Release Cycle; Enzymatic degradation of Dopamine by monoamine oxidase; Metabolism of serotonin; Biogenic amines are oxidatively deaminated to aldehydes by MAOA and MAOB	SIDS susceptibility pathways; Oxidative stress response; Biogenic amine synthesis	9	1	1.986	1
353	High	Master Protein	Q61553	Fascin [OS=Mus musculus]	0	115.33	53	20	69	20	493	54.5	6.89	158.13	20	cell organization and biogenesis;other biological processes	plasma membrane;other membranes;cytosol;cytoskeleton;other cell component	cytoskeletal activity;other molecular function	Pf06268	14086	ENSMUSG00000029581	Fscn1	mmu:14086; O09099; O09156; Q05DK3; Q61553; Q7TN32; Q80V75			0	0	1.983	1
354	High	Master Protein	Q8BH44	Coronin-2B [OS=Mus musculus]	0	21.37	10	5	14	5	480	54.9	8.27	19.91	5	cell adhesion;cell organization and biogenesis;other biological processes	cytoskeleton;other cell component	cytoskeletal activity	Pf00400, Pf08953, Pf16300	235431	ENSMUSG00000041729	Coro2b	mmu:235431; Q6P5U9; Q8BH44			0	0	1.982	1
355	High	Master Protein	Q80TZ3	Putative tyrosine-protein phosphatase auxilin [OS=Mus musculus]	0	52.291	14	11	24	11	938	102.2	7.23	52.46	11	cell organization and biogenesis;other metabolic processes;transport;other biological processes	plasma membrane;other membranes;other cell component	other molecular function	Pf10409	72685	ENSMUSG00000028528	Dnajc6	B1B0B9; mmu:72685; Q6P2K9; Q80TZ3; Q8C7L9	Clathrin-mediated endocytosis; Golgi Associated Vesicle Biogenesis; Lysosome Vesicle Biogenesis		3	0	1.98	1
356	High	Master Protein	Q9WUM4	Coronin-1C [OS=Mus musculus]	0	24.804	15	5	5	5	474	53.1	7.08	14.4	5	cell organization and biogenesis;transport;developmental processes;other biological processes	plasma membrane;other membranes;cytoskeleton;other cytoplasmic organelle;other cell component	cytoskeletal activity;other molecular function	Pf00400, Pf08953, Pf16300	23790	ENSMUSG00000004530	Coro1c	mmu:23790; Q499X7; Q8VCQ5; Q9WUM4			0	0	1.976	1
357	High	Master Protein	P19096	Fatty acid synthase [OS=Mus musculus]	0	38.078	4	10	17	10	2504	272.3	6.58	22.54	10	other metabolic processes;stress response;other biological processes	plasma membrane;other membranes;cytosol;ER/Golgi;other cell component	other molecular function	Pf00107, Pf00109, Pf00550, Pf00698, Pf00975, Pf02801, Pf08242, Pf08659, Pf14765, Pf16197	14104	ENSMUSG00000025153	Fasn	B1ATU8; mmu:14104; P19096; Q6PB72; Q8C4Z0; Q9EQR0	ChREBP activates metabolic gene expression; Fatty acyl-CoA biosynthesis; Vitamin B5 (pantothenate) metabolism	Fatty acid biosynthesis; Dysregulated miRNA targeting in insulin/PI3K-AKT signaling; Cholesterol metabolism with Bloch and Kandutsch-Russell pathways; Omega-9 fatty acid synthesis; Elongation of (very) long chain fatty acids	8	0	1.976	1
358	High	Master Protein	P63101	14-3-3 protein zeta/delta [OS=Mus musculus]	0	116.416	55	16	98	11	245	27.8	4.79	197.47	16	cell-cell signaling;cell organization and biogenesis;protein metabolism;other metabolic processes;stress response;transport;developmental processes;signal transduction;other biological processes	cytosol;nucleus;other cell component	other molecular function	Pf00244	22631	ENSMUSG00000022285	Ywhaz	mmu:22631; P35215; P63101; P70197; P97286; Q3TSF1; Q5EBQ1	TP53 Regulates Metabolic Genes; Activation of BAD and translocation to mitochondria ; RHO GTPases activate PKNs; Chk1/Chk2(Cds1) mediated inactivation of Cyclin B:Cdk1 complex; Rap1 signalling; GP1b-IX-V activation signalling; Interleukin-3, Interleukin-5 and GM-CSF signaling; Deactivation of the beta-catenin transactivating complex; Regulation of localization of FOXO transcription factors; NOTCH…	IL-5 signaling pathway; IL-3 signaling pathway; Myometrial relaxation and contraction pathways; Alpha 6 beta 4 integrin signaling pathway; Calcium regulation in cardiac cells	16	3	1.975	1
359	High	Master Protein	Q91ZX7	Prolow-density lipoprotein receptor-related protein 1 [OS=Mus musculus]	0	167.731	11	38	75	37	4545	504.4	5.36	140.09	38	cell cycle OR cell proliferation;cell organization and biogenesis;other metabolic processes;stress response;transport;developmental processes;signal transduction;other biological processes	plasma membrane;other membranes;cytoskeleton;ER/Golgi;nucleus;other cytoplasmic organelle;other cell component	signal transduction activity or receptor binding;other molecular function	Pf00008, Pf00057, Pf00058, Pf07645, Pf12662, Pf14670, Pf16472	16971		Lrp1	mmu:16971; Q61291; Q91ZX7; Q920Y4	Retinoid metabolism and transport; Scavenging of heme from plasma	Statin pathway; Wnt signaling pathway	4	1	1.974	1
360	High	Master Protein	P63017	Heat shock cognate 71 kDa protein [OS=Mus musculus]	0	138.235	40	23	83	20	646	70.8	5.52	242.76	23	cell cycle OR cell proliferation;cell organization and biogenesis;protein metabolism;RNA metabolism OR transcription;other metabolic processes;stress response;transport;developmental processes;other biological processes	non-structural extracellular;plasma membrane;other membranes;cytosol;cytoskeleton;ER/Golgi;nucleus;other cytoplasmic organelle;other cell component	signal transduction activity or receptor binding;nucleic acid binding activity;other molecular function	Pf00012	15481	ENSMUSG00000015656	Hspa8	mmu:15481; P08109; P12225; P63017; Q3U6R0; Q3U764; Q3U7D7; Q3U7E2; Q3U9B4; Q3U9G0; Q3UGM0; Q5FWJ6; Q62373; Q62374; Q62375; Q6NZD0	HSP90 chaperone cycle for steroid hormone receptors (SHR) in the presence of ligand; mRNA Splicing - Major Pathway; Neutrophil degranulation; Regulation of HSF1-mediated heat shock response; Clathrin-mediated endocytosis; Golgi Associated Vesicle Biogenesis; Attenuation phase; Lysosome Vesicle Biogenesis; GABA synthesis, release, reuptake and degradation; AUF1 (hnRNP D0) binds and destabilizes mR…	Mapk signaling pathway; Exercise-induced circadian regulation	14	3	1.972	1
361	High	Master Protein	P59999	Actin-related protein 2/3 complex subunit 4 [OS=Mus musculus]	0	29.707	42	6	20	6	168	19.7	8.43	47.96	6	cell organization and biogenesis	cytoskeleton;nucleus;other cell component	cytoskeletal activity;other molecular function	Pf05856	68089	ENSMUSG00000079426	Arpc4	mmu:68089; O15509; P59999; Q3UWV4	Regulation of actin dynamics for phagocytic cup formation; RHO GTPases Activate WASPs and WAVEs; Clathrin-mediated endocytosis; EPHB-mediated forward signaling		4	0	1.967	1
362	High	Master Protein	P46638	Ras-related protein Rab-11B [OS=Mus musculus]	0	13.776	26	6	9	6	218	24.5	5.94	13.73	6	cell-cell signaling;other metabolic processes;transport;other biological processes	other membranes;ER/Golgi;other cytoplasmic organelle;other cell component	cytoskeletal activity;other molecular function	Pf00071	19326	ENSMUSG00000077450	Rab11b	mmu:19326; P46638	RAB geranylgeranylation; TBC/RABGAPs	Focal adhesion: PI3K-Akt-mTOR signaling pathway	3	0	1.965	1
363	High	Master Protein	P62835	Ras-related protein Rap-1A [OS=Mus musculus]	0	46.698	45	8	16	8	184	21	6.67	46.7	8	cell-cell signaling;transport;developmental processes;signal transduction;other biological processes	plasma membrane;other membranes;cytoskeleton;other cytoplasmic organelle;other cell component	enzyme regulator activity;other molecular function	Pf00071	109905	ENSMUSG00000068798	Rap1a	mmu:109905; P10113; P62835	Neutrophil degranulation; MAP2K and MAPK activation; Rap1 signalling; GRB2:SOS provides linkage to MAPK signaling for Integrins ; p130Cas linkage to MAPK signaling for integrins; ARMS-mediated activation; Glucagon-like Peptide-1 (GLP1) regulates insulin secretion; Frs2-mediated activation; MET activates RAP1 and RAC1	Chemokine signaling pathway; IL-3 signaling pathway; Mapk signaling pathway; Integrin-mediated cell adhesion; Focal adhesion	15	0	1.961	1
364	High	Master Protein	Q3UHL1	CaM kinase-like vesicle-associated protein [OS=Mus musculus]	0	38.854	17	7	17	7	512	54.8	5.54	42.65	7	protein metabolism;other metabolic processes;other biological processes	plasma membrane;other membranes;other cell component	kinase activity;other molecular function	Pf00069	235604	ENSMUSG00000032936	Camkv	mmu:235604; Q3UHL1; Q8VD20			0	0	1.952	1
365	High	Master Protein	P05063	Fructose-bisphosphate aldolase C [OS=Mus musculus]	0	72.795	42	14	36	12	363	39.4	7.12	79.75	14	other metabolic processes;other biological processes	cytosol;other cell component	cytoskeletal activity;other molecular function	Pf00274	11676	ENSMUSG00000017390	Aldoc	mmu:11676; P05063; Q64011; Q8CA91; Q99K96; Q9DBA4; Q9JK32	Neutrophil degranulation; Gluconeogenesis; Glycolysis	Glycolysis and gluconeogenesis	4	0	1.946	1
366	High	Master Protein	Q8K0U4	Heat shock 70 kDa protein 12A [OS=Mus musculus]	0	51.612	25	14	29	14	675	74.8	6.77	52.89	14		nucleus;other cell component	other molecular function		73442	ENSMUSG00000025092	Hspa12a	mmu:73442; Q3UQZ8; Q8CHF6; Q8K0U4	Regulation of HSF1-mediated heat shock response		1	0	1.946	1
367	High	Master Protein	P56480	ATP synthase subunit beta, mitochondrial [OS=Mus musculus]	0	77.25	36	15	36	15	529	56.3	5.34	93.8	15	other metabolic processes;transport;developmental processes;other biological processes	plasma membrane;other membranes;mitochondrion;other cell component	signal transduction activity or receptor binding;transporter activity;other molecular function	Pf00006, Pf02874	11947	ENSMUSG00000025393	Atp5f1b	mmu:11947; P56480; Q0QEP4; Q3TFD7; Q3TIP9; Q3TK44; Q3TWD5; Q3TX28; Q3U6U4; Q3U774; Q3UB69; Q3UF69; Q8CI65; Q8VEJ5; Q9CTI7; Q9CWX7	Mitochondrial protein import; Formation of ATP by chemiosmotic coupling; Cristae formation	Oxidative phosphorylation; Electron transport chain	5	0	1.941	1
368	High	Master Protein	P17182	Alpha-enolase [OS=Mus musculus]	0	168.141	53	22	105	20	434	47.1	6.8	291.66	22	RNA metabolism OR transcription;other metabolic processes;developmental processes;other biological processes	plasma membrane;other membranes;cytosol;nucleus;other cell component	nucleic acid binding activity;other molecular function	Pf00113, Pf03952	13806; 433182	ENSMUSG00000059040; ENSMUSG00000063524	Eno1	mmu:13806; mmu:433182; P17182; Q99KT7; Q9DCY7	Gluconeogenesis; Glycolysis	Glycolysis and gluconeogenesis	3	1	1.941	1
369	High	Master Protein	P16125	L-lactate dehydrogenase B chain [OS=Mus musculus]	0	88.09	44	14	71	13	334	36.5	6.05	159.67	14	other metabolic processes	other membranes;cytosol;mitochondrion;other cell component	other molecular function	Pf00056, Pf02866	16832	ENSMUSG00000030246	Ldhb	mmu:16832; P16125; Q545Y4	Pyruvate metabolism	Glycolysis and gluconeogenesis	2	1	1.938	1
370	High	Master Protein	Q61292	Laminin subunit beta-2 [OS=Mus musculus]	0	77.781	12	19	41	19	1799	196.5	6.67	62.05	19	cell adhesion;cell organization and biogenesis;stress response;developmental processes;other biological processes	non-structural extracellular;extracellular matrix;other cell component	signal transduction activity or receptor binding;extracellular structural activity	Pf00053, Pf00055	16779	ENSMUSG00000052911	Lamb2	mmu:16779; Q61292; Q62182; Q8R0Y0		Primary focal segmental glomerulosclerosis (FSGS); Focal adhesion: PI3K-Akt-mTOR signaling pathway; Inflammatory response pathway; Alpha 6 beta 4 integrin signaling pathway; Focal adhesion	5	0	1.93	1
371	High	Master Protein	P62743	AP-2 complex subunit sigma [OS=Mus musculus]	0	16.925	34	5	14	5	142	17	6.18	6.2	5	transport	plasma membrane;other membranes;other cell component	other molecular function	Pf01217	232910	ENSMUSG00000008036	Ap2s1	mmu:232910; P62743; P70626; P97626; Q00380	MHC class II antigen presentation; Recycling pathway of L1; Cargo recognition for clathrin-mediated endocytosis; LDL clearance; Trafficking of GluR2-containing AMPA receptors; Retrograde neurotrophin signalling; WNT5A-dependent internalization of FZD4; WNT5A-dependent internalization of FZD2, FZD5 and ROR2; VLDLR internalisation and degradation		10	0	1.927	1
372	High	Master Protein	Q7TQI3	Ubiquitin thioesterase OTUB1 [OS=Mus musculus]	0	37.96	31	7	16	7	271	31.3	4.94	37.32	7	protein metabolism;DNA metabolism;other metabolic processes;stress response;other biological processes	nucleus;other cell component	other molecular function	Pf10275	107260	ENSMUSG00000024767	Otub1	mmu:107260; Q3ULV9; Q3V408; Q7TQI3; Q8C326; Q8R5F2	Ovarian tumor domain proteases; Ub-specific processing proteases		2	0	1.925	1
373	High	Master Protein	Q01097	Glutamate receptor ionotropic, NMDA 2B [OS=Mus musculus]	0	160.181	20	25	85	23	1482	165.9	6.87	179.62	25	cell-cell signaling;cell organization and biogenesis;stress response;transport;developmental processes;signal transduction;other biological processes	non-structural extracellular;plasma membrane;other membranes;cytoskeleton;ER/Golgi;other cytoplasmic organelle;other cell component	signal transduction activity or receptor binding;transporter activity;other molecular function	Pf00060, Pf01094, Pf10565, Pf10613	14812		Grin2b	mmu:14812; Q01097; Q9DCB2	Synaptic adhesion-like molecules; RAF/MAP kinase cascade; EPHB-mediated forward signaling; Assembly and cell surface presentation of NMDA receptors; Unblocking of NMDA receptors, glutamate binding and activation	Splicing factor NOVA regulated synaptic proteins	6	1	1.915	1
374	High	Master Protein	P99024	Tubulin beta-5 chain [OS=Mus musculus]	0	407.45	67	27	497	5	444	49.6	4.89	1455.63	27	cell cycle OR cell proliferation;cell organization and biogenesis;other biological processes	other membranes;cytosol;cytoskeleton;nucleus;other cell component	signal transduction activity or receptor binding;cytoskeletal activity;other molecular function	Pf00091, Pf03953	22154	ENSMUSG00000001525	Tubb5	B1B178; mmu:22154; P05218; P99024; Q3TFB6; Q3THH9; Q3TIL1; Q3UAV4; Q3UF52; Q8WUC1; Q9CY33	Neutrophil degranulation; Anchoring of the basal body to the plasma membrane; Regulation of PLK1 Activity at G2/M Transition; Loss of Nlp from mitotic centrosomes; Recruitment of mitotic centrosome proteins and complexes; Recruitment of NuMA to mitotic centrosomes; AURKA Activation by TPX2		8	0	1.912	1
375	High	Master Protein	Q9CQI6	Coactosin-like protein [OS=Mus musculus]	0	24.767	44	7	18	7	142	15.9	5.4	37.34	7	cell organization and biogenesis;stress response	cytosol;cytoskeleton;nucleus;other cell component	cytoskeletal activity;other molecular function	Pf00241	72042	ENSMUSG00000031827	Cotl1	mmu:72042; Q9CQI6	Neutrophil degranulation		1	0	1.909	1
376	High	Master Protein	Q8K0S0	Phytanoyl-CoA hydroxylase-interacting protein [OS=Mus musculus]	0	55.275	23	8	26	7	330	37.5	7.01	35.42	8	other biological processes	other cell component	other molecular function	Pf19281	105653	ENSMUSG00000003469	Phyhip	mmu:105653; Q8K0S0			0	2	1.906	1
377	High	Master Protein	P68404	Protein kinase C beta type [OS=Mus musculus]	0	98.634	29	17	64	11	671	76.7	7.01	113.06	17	cell-cell signaling;cell organization and biogenesis;protein metabolism;RNA metabolism OR transcription;other metabolic processes;transport;signal transduction;other biological processes	plasma membrane;other membranes;cytosol;cytoskeleton;nucleus;other cell component	kinase activity;other molecular function	Pf00069, Pf00130, Pf00168, Pf00433	18751	ENSMUSG00000052889	Prkcb	A0JNZ5; F2Z441; mmu:18751; P04410; P04411; P68404	VEGFR2 mediated cell proliferation; Trafficking of GluR2-containing AMPA receptors; Depolymerization of the Nuclear Lamina; WNT5A-dependent internalization of FZD4; Activation of NF-kappaB in B cells; RHO GTPases Activate NADPH Oxidases; Disinhibition of SNARE formation	IL-5 signaling pathway; MicroRNAs in cardiomyocyte hypertrophy; Serotonin and anxiety-related events; Serotonin and anxiety; Chemokine signaling pathway; G protein signaling pathways; IL-3 signaling pathway; Myometrial relaxation and contraction pathways; Wnt signaling pathway; Kit receptor signaling pathway; Mapk signaling pathway; Wnt signaling pathway; Calcium regulation in cardiac cells; EGFR…	24	5	1.903	1
378	High	Master Protein	P60335	Poly(rC)-binding protein 1 [OS=Mus musculus]	0	29.454	25	7	17	7	356	37.5	7.09	24.27	7	RNA metabolism OR transcription;other metabolic processes;other biological processes	cytosol;nucleus;other cell component	nucleic acid binding activity;other molecular function	Pf00013	23983	ENSMUSG00000051695	Pcbp1	mmu:23983; P60335	mRNA Splicing - Major Pathway; Processing of Capped Intron-Containing Pre-mRNA	mRNA processing	3	0	1.894	1
379	High	Master Protein	Q8VEK3	Heterogeneous nuclear ribonucleoprotein U [OS=Mus musculus]	0	79.176	23	18	56	18	800	87.9	6.24	108.56	18	cell cycle OR cell proliferation;cell organization and biogenesis;RNA metabolism OR transcription;other metabolic processes;transport;developmental processes;other biological processes	cytosol;cytoskeleton;nucleus;other cell component	cytoskeletal activity;nucleic acid binding activity;other molecular function	Pf00622, Pf02037, Pf13671	51810	ENSMUSG00000039630	Hnrnpu	G3XA10; mmu:51810; Q8VEK3; Q9R205	mRNA Splicing - Major Pathway; Processing of Capped Intron-Containing Pre-mRNA	Mechanisms associated with pluripotency; mRNA processing	4	0	1.893	1
380	High	Master Protein	P68510	14-3-3 protein eta [OS=Mus musculus]	0	78.781	46	16	56	11	246	28.2	4.89	101.09	16	cell organization and biogenesis;other metabolic processes;transport;signal transduction;other biological processes	plasma membrane;other membranes;cytosol;other cell component	cytoskeletal activity;other molecular function	Pf00244	22629	ENSMUSG00000018965	Ywhah	mmu:22629; P11576; P68510; P70198; Q3TGZ9	TP53 Regulates Metabolic Genes; Activation of BAD and translocation to mitochondria ; RHO GTPases activate PKNs; Chk1/Chk2(Cds1) mediated inactivation of Cyclin B:Cdk1 complex	Myometrial relaxation and contraction pathways; Alpha 6 beta 4 integrin signaling pathway; Calcium regulation in cardiac cells	7	6	1.892	1
381	High	Master Protein	Q9QZX7	Serine racemase [OS=Mus musculus]	0	25.697	24	4	11	4	339	36.3	6.02	23.55	4	other metabolic processes;developmental processes;other biological processes	plasma membrane;other membranes;other cell component	other molecular function	Pf00291	27364	ENSMUSG00000001323	Srr	mmu:27364; Q401M7; Q5SWE4; Q5SWE5; Q5SWE7; Q8BT19; Q8CD11; Q9QZX7	Serine biosynthesis		1	0	1.89	1
382	High	Master Protein	P16330	2',3'-cyclic-nucleotide 3'-phosphodiesterase [OS=Mus musculus]	0	253.075	64	35	257	35	420	47.1	8.97	663.17	35	cell organization and biogenesis;other metabolic processes;transport;developmental processes;other biological processes	non-structural extracellular;plasma membrane;other membranes;cytoskeleton;mitochondrion;other cell component	nucleic acid binding activity;other molecular function	Pf05881, Pf13671	12799	ENSMUSG00000006782	Cnp	mmu:12799; P16330; Q61424; Q8C7C9; Q91V42; Q923F3			0	0	1.884	1
383	High	Master Protein	P11798	Calcium/calmodulin-dependent protein kinase type II subunit alpha [OS=Mus musculus]	0	142.151	54	26	117	20	478	54.1	7.08	262.08	26	cell cycle OR cell proliferation;cell organization and biogenesis;protein metabolism;other metabolic processes;stress response;transport;developmental processes;signal transduction;other biological processes	plasma membrane;other membranes;cytosol;mitochondrion;nucleus;other cell component	signal transduction activity or receptor binding;kinase activity;other molecular function	Pf00069, Pf08332	12322	ENSMUSG00000024617	Camk2a	mmu:12322; P11798; Q61284; Q6ZWN4	HSF1-dependent transactivation; Ion homeostasis; Ion transport by P-type ATPases; Ca2+ pathway; Trafficking of AMPA receptors; RAF activation; Interferon gamma signaling; Unblocking of NMDA receptors, glutamate binding and activation	ErbB signaling pathway; Myometrial relaxation and contraction pathways; Wnt signaling pathway; Calcium regulation in cardiac cells; EGFR1 signaling pathway	14	7	1.875	1
384	High	Master Protein	P25444	40S ribosomal protein S2 [OS=Mus musculus]	0	18.651	15	4	9	4	293	31.2	10.24	12.2	4	protein metabolism;other metabolic processes;other biological processes	cytosol;translational apparatus;nucleus;other cell component	nucleic acid binding activity;other molecular function	Pf00333, Pf03719	16898	ENSMUSG00000044533	Rps2	mmu:16898; P25444	L13a-mediated translational silencing of Ceruloplasmin expression; SRP-dependent cotranslational protein targeting to membrane; Major pathway of rRNA processing in the nucleolus and cytosol; Formation of a pool of free 40S subunits; GTP hydrolysis and joining of the 60S ribosomal subunit; Nonsense Mediated Decay (NMD) independent of the Exon Junction Complex (EJC); Nonsense Mediated Decay (NMD) e…	Cytoplasmic ribosomal proteins	13	0	1.874	1
385	High	Master Protein	P12382	ATP-dependent 6-phosphofructokinase, liver type [OS=Mus musculus]	0	73.418	24	14	29	11	780	85.3	7.17	53.04	14	other metabolic processes;other biological processes	other membranes;cytosol	kinase activity;other molecular function	Pf00365	18641	ENSMUSG00000020277	Pfkl	mmu:18641; P12382; Q8VDX7	Neutrophil degranulation; Glycolysis	Glycolysis and gluconeogenesis; Insulin signaling	4	0	1.867	1
386	High	Master Protein	Q9QUI0	Transforming protein RhoA [OS=Mus musculus]	0	37.123	32	7	21	6	193	21.8	6.1	37.78	7	cell adhesion;cell cycle OR cell proliferation;cell organization and biogenesis;other metabolic processes;stress response;developmental processes;signal transduction;other biological processes	plasma membrane;other membranes;cytosol;cytoskeleton;nucleus;other cytoplasmic organelle;other cell component	cytoskeletal activity;other molecular function	Pf00071	11848	ENSMUSG00000007815	Rhoa	mmu:11848; O88336; Q9QUI0	Neutrophil degranulation; RHO GTPases Activate Formins; EPHB-mediated forward signaling; RHOA GTPase cycle; ERBB2 Regulates Cell Motility; Ovarian tumor domain proteases; G alpha (12/13) signalling events; RHOC GTPase cycle; GPVI-mediated activation cascade; PTK6 Regulates RHO GTPases, RAS GTPase and MAP kinases; RHO GTPases activate CIT; EPHA-mediated growth cone collapse; PI3K/AKT activation; V…	MicroRNAs in cardiomyocyte hypertrophy; Chemokine signaling pathway; G protein signaling pathways; Spinal cord injury; G13 signaling pathway; Wnt signaling in kidney disease; Wnt signaling pathway; Alpha 6 beta 4 integrin signaling pathway; Fibrin complement receptor 3 signaling pathway; Regulation of actin cytoskeleton; Comprehensive IL-17A signaling; Wnt signaling pathway; Wnt signaling pathway…	40	1	1.866	1
387	High	Master Protein	Q8BG39	Synaptic vesicle glycoprotein 2B [OS=Mus musculus]	0	26.817	13	7	17	7	683	77.4	5.57	8.89	7	cell-cell signaling;transport;other biological processes	other membranes;ER/Golgi;other cell component	transporter activity	Pf00083, Pf07690	64176	ENSMUSG00000053025	Sv2b	mmu:64176; Q80TT1; Q8BG39; Q9ES95			0	0	1.863	1
388	High	Master Protein	P51150	Ras-related protein Rab-7a [OS=Mus musculus]	0	20.318	32	6	13	6	207	23.5	6.7	29.28	6	cell organization and biogenesis;protein metabolism;other metabolic processes;transport;other biological processes	other membranes;cytosol;mitochondrion;ER/Golgi;other cytoplasmic organelle;other cell component	other molecular function	Pf00071	19349	ENSMUSG00000079477	Rab7a	mmu:19349; P51150	TBC/RABGAPs; RAB geranylgeranylation; Neutrophil degranulation; RAB GEFs exchange GTP for GDP on RABs; MHC class II antigen presentation; RAC1 GTPase cycle; RHOQ GTPase cycle; RHOG GTPase cycle; RHOH GTPase cycle; RAC2 GTPase cycle; RAC3 GTPase cycle; RHOF GTPase cycle; RHOD GTPase cycle		13	0	1.857	1
389	High	Master Protein	Q02257	Junction plakoglobin [OS=Mus musculus]	0	61.778	23	14	28	12	745	81.7	6.14	64.38	14	cell adhesion;cell-cell signaling;cell organization and biogenesis;RNA metabolism OR transcription;signal transduction;other biological processes	plasma membrane;other membranes;cytosol;cytoskeleton;nucleus;other cell component	other molecular function	Pf00514	16480	ENSMUSG00000001552	Jup	mmu:16480; Q02257; Q8CGD3	Neutrophil degranulation; RHOA GTPase cycle; RHOB GTPase cycle; Formation of the cornified envelope; RHOQ GTPase cycle; RHOC GTPase cycle; RHOH GTPase cycle; Adherens junctions interactions; Regulation of CDH11 function; VEGFR2 mediated vascular permeability	Wnt signaling pathway	12	1	1.856	1
390	High	Master Protein	Q921M7	CYFIP-related Rac1 interactor B [OS=Mus musculus]	0	22.115	19	4	9	4	324	36.8	6.06	24.52	4	cell organization and biogenesis;other biological processes	other membranes;mitochondrion;other cell component	signal transduction activity or receptor binding;other molecular function	Pf07159	223601	ENSMUSG00000022378	Cyrib	mmu:223601; Q921M7	Platelet degranulation		1	0	1.848	1
391	High	Master Protein	P62259	14-3-3 protein epsilon [OS=Mus musculus]	0	108.367	61	16	72	14	255	29.2	4.74	149.9	16	stress response;transport;developmental processes;signal transduction;other biological processes	plasma membrane;other membranes;cytosol;cytoskeleton;nucleus;other cell component	other molecular function	Pf00244	22627	ENSMUSG00000020849	Ywhae	mmu:22627; P29360; P42655; P62259; Q63631	Regulation of HSF1-mediated heat shock response; RAB GEFs exchange GTP for GDP on RABs; Anchoring of the basal body to the plasma membrane; Regulation of PLK1 Activity at G2/M Transition; Loss of Nlp from mitotic centrosomes; Recruitment of mitotic centrosome proteins and complexes; Recruitment of NuMA to mitotic centrosomes; AURKA Activation by TPX2; TP53 Regulates Metabolic Genes; Activation of…	Myometrial relaxation and contraction pathways; Alpha 6 beta 4 integrin signaling pathway; Calcium regulation in cardiac cells	19	0	1.846	1
392	High	Master Protein	O88322	Nidogen-2 [OS=Mus musculus]	0	36.544	8	9	28	9	1403	153.8	5.38	32.26	9	cell adhesion	non-structural extracellular;extracellular matrix;plasma membrane;other membranes;other cell component	other molecular function	Pf00058, Pf00086, Pf06119, Pf07474, Pf07645, Pf12947	18074	ENSMUSG00000021806	Nid2	mmu:18074; O88322; Q7TQF0	Laminin interactions		1	0	1.845	1
393	High	Master Protein	P62071	Ras-related protein R-Ras2 [OS=Mus musculus]	0	22.429	25	5	13	5	204	23.4	6.01	22.89	5	developmental processes;signal transduction;other biological processes	plasma membrane;other membranes;ER/Golgi	other molecular function	Pf00071	66922	ENSMUSG00000055723	Rras2	mmu:66922; P17082; P62071; Q3TA79; Q8C5D1; Q9D0H6	RND1 GTPase cycle	Regulation of actin cytoskeleton; Comprehensive IL-17A signaling	3	0	1.84	1
394	High	Master Protein	Q6PIE5	Sodium/potassium-transporting ATPase subunit alpha-2 [OS=Mus musculus]	0	189.394	31	31	168	13	1020	112.1	5.55	420.13	31	other metabolic processes;stress response;transport;developmental processes;other biological processes	plasma membrane;other membranes;other cytoplasmic organelle;other cell component	transporter activity;other molecular function	Pf00122, Pf00689, Pf00690, Pf00702, Pf13246	98660	ENSMUSG00000007097	Atp1a2	mmu:98660; Q6PIE5; Q80UZ8	Ion homeostasis; Ion transport by P-type ATPases		2	0	1.839	1
395	High	Master Protein	Q9Z2Q6	Septin-5 [OS=Mus musculus]	0	19.936	14	5	14	5	369	42.7	6.67	25.05	5	cell cycle OR cell proliferation;other biological processes	plasma membrane;other membranes;cytoskeleton;ER/Golgi;other cell component	other molecular function	Pf00735	18951	ENSMUSG00000072214	Septin5	B2RUC5; mmu:18951; Q3UYG4; Q6PB74; Q9Z2Q6		Parkinson's disease	1	0	1.837	1
396	High	Master Protein	P21279	Guanine nucleotide-binding protein G(q) subunit alpha [OS=Mus musculus]	0	32.766	25	8	10	6	359	42.1	5.68	14.88	8	cell-cell signaling;developmental processes;signal transduction;other biological processes	plasma membrane;other membranes;cytosol;ER/Golgi;nucleus;other cell component	signal transduction activity or receptor binding;enzyme regulator activity;other molecular function	Pf00503	14682	ENSMUSG00000024639	Gnaq	mmu:14682; P21279; Q6PFF5	G alpha (q) signalling events; PLC beta mediated events; Acetylcholine regulates insulin secretion; Fatty Acids bound to GPR40 (FFAR1) regulate insulin secretion; Thromboxane signalling through TP receptor; Thrombin signalling through proteinase activated receptors (PARs); G-protein activation; Cooperation of PDCL (PhLP1) and TRiC/CCT in G-protein beta folding; ADP signalling through P2Y purinoce…	Alzheimer's disease; Serotonin receptor 2 and STAT3 signaling; G protein signaling pathways; Myometrial relaxation and contraction pathways; Calcium regulation in cardiac cells	14	2	1.837	1
397	High	Master Protein	Q9Z0S1	3'(2'),5'-bisphosphate nucleotidase 1 [OS=Mus musculus]	0	20.418	17	5	10	5	308	33.2	5.82	16.95	5	other metabolic processes		other molecular function	Pf00459	23827	ENSMUSG00000026617	Bpnt1	mmu:23827; Q3U8Z5; Q91XB9; Q9D7Y0; Q9Z0S1	Cytosolic sulfonation of small molecules		1	0	1.836	1
398	High	Master Protein	Q9ERD7	Tubulin beta-3 chain [OS=Mus musculus]	0	316.456	65	26	366	8	450	50.4	4.93	1048.05	26	cell cycle OR cell proliferation;cell organization and biogenesis;developmental processes;signal transduction	cytoskeleton;other cell component	signal transduction activity or receptor binding;cytoskeletal activity;other molecular function	Pf00091, Pf03953	22152	ENSMUSG00000062380	Tubb3	mmu:22152; Q3UF42; Q5I036; Q9ERD7	Separation of Sister Chromatids; The role of GTSE1 in G2/M progression after G2 checkpoint; Aggrephagy; COPI-dependent Golgi-to-ER retrograde traffic; Kinesins; MHC class II antigen presentation; Recruitment of NuMA to mitotic centrosomes; Recycling pathway of L1; COPI-independent Golgi-to-ER retrograde traffic; COPI-mediated anterograde transport; Resolution of Sister Chromatid Cohesion; RHO GTP…		22	4	1.833	1
399	High	Master Protein	P63330	Serine/threonine-protein phosphatase 2A catalytic subunit alpha isoform [OS=Mus musculus]	0	27.13	20	5	11	5	309	35.6	5.54	32.83	5	cell cycle OR cell proliferation;protein metabolism;other metabolic processes;other biological processes	plasma membrane;other membranes;cytosol;cytoskeleton;nucleus;other cell component	signal transduction activity or receptor binding;enzyme regulator activity;cytoskeletal activity;other molecular function	Pf00149	19052	ENSMUSG00000020349	Ppp2ca	mmu:19052; O88591; P13353; P63330; Q5SNY5	Nonsense Mediated Decay (NMD) enhanced by the Exon Junction Complex (EJC); PI5P, PP2A and IER3 Regulate PI3K/AKT Signaling; Cyclin A/B1/B2 associated events during G2/M transition; Separation of Sister Chromatids; Amplification of signal from unattached kinetochores via a MAD2 inhibitory signal; Resolution of Sister Chromatid Cohesion; RHO GTPases Activate Formins; EML4 and NUDC in mitotic spindl…	Focal adhesion: PI3K-Akt-mTOR signaling pathway; Glycogen metabolism; IL-3 signaling pathway; IL-6 signaling pathway; Wnt signaling pathway; Wnt signaling pathway and pluripotency	30	0	1.824	1
400	High	Master Protein	Q2PFD7	PH and SEC7 domain-containing protein 3 [OS=Mus musculus]	0	14.122	5	4	7	4	1037	114.7	6.24	8.98	4	signal transduction;other biological processes	plasma membrane;other membranes;other cell component	enzyme regulator activity	Pf01369, Pf15410	234353	ENSMUSG00000030465	Psd3	mmu:234353; Q2PFD7; Q3TTA1; Q80TN6; Q80UZ7; Q8CEA6			0	0	1.823	1
401	High	Master Protein	Q62261	Spectrin beta chain, non-erythrocytic 1 [OS=Mus musculus]	0	12.913	2	4	4	4	2363	274.1	5.58	4.1	4	cell cycle OR cell proliferation;cell organization and biogenesis;protein metabolism;other metabolic processes;transport;developmental processes;signal transduction;other biological processes	plasma membrane;other membranes;cytosol;cytoskeleton;nucleus;other cell component	cytoskeletal activity;other molecular function	Pf00307, Pf00435, Pf15410	20742	ENSMUSG00000020315	Sptbn1	A2AFU1; mmu:20742; Q3TEM7; Q5SQL8; Q5SQL9; Q62261; Q9QWJ7	COPI-mediated anterograde transport; RAF/MAP kinase cascade; NCAM signaling for neurite out-growth; Interaction between L1 and Ankyrins; RHOU GTPase cycle; RHOV GTPase cycle		6	0	1.823	1
402	High	Master Protein	Q9D6F4	Gamma-aminobutyric acid receptor subunit alpha-4 [OS=Mus musculus]	0	20.13	12	6	14	6	552	60.8	9.32	20.16	6	cell-cell signaling;transport;developmental processes;signal transduction;other biological processes	plasma membrane;other membranes;other cell component	transporter activity;other molecular function	Pf02931, Pf02932	14397	ENSMUSG00000029211	Gabra4	mmu:14397; Q9D6F4	GABA receptor activation		1	0	1.823	1
403	High	Master Protein	Q8R081	Heterogeneous nuclear ribonucleoprotein L [OS=Mus musculus]	0	47.119	21	8	16	8	586	63.9	8.1	42.31	8	RNA metabolism OR transcription;other metabolic processes;other biological processes	cytosol;nucleus;other cell component	nucleic acid binding activity	Pf00076, Pf11835, Pf13893	15388	ENSMUSG00000015165	Hnrnpl	mmu:15388; O54789; Q499X2; Q8K0S7; Q8R081	mRNA Splicing - Major Pathway; Processing of Capped Intron-Containing Pre-mRNA	mRNA processing	3	0	1.812	1
404	High	Master Protein	P10126	Elongation factor 1-alpha 1 [OS=Mus musculus]	0	88.517	39	17	71	8	462	50.1	9.01	179.99	17	protein metabolism;other metabolic processes;other biological processes	plasma membrane;other membranes;cytosol;cytoskeleton;nucleus;other cell component	nucleic acid binding activity;other molecular function	Pf00009, Pf03143, Pf03144	13627	ENSMUSG00000037742	Eef1a1	mmu:13627; P10126; Q61511; Q6ZWN2; Q8BMB8; Q8BVS8; Q99KU5	Neutrophil degranulation; Eukaryotic Translation Elongation; HSF1 activation; Protein methylation	Translation factors; EGFR1 signaling pathway	6	9	1.809	1
405	High	Master Protein	P17183	Gamma-enolase [OS=Mus musculus]	0	73.087	38	10	40	8	434	47.3	5.11	110.94	10	other metabolic processes;other biological processes	plasma membrane;other membranes;cytosol;other cell component	other molecular function	Pf00113, Pf03952	13807	ENSMUSG00000004267	Eno2	mmu:13807; P17183	Gluconeogenesis; Glycolysis	Glycolysis and gluconeogenesis	3	0	1.809	1
406	High	Master Protein	P18872	Guanine nucleotide-binding protein G(o) subunit alpha [OS=Mus musculus]	0	125.296	55	17	91	15	354	40.1	5.53	224.27	17	transport;signal transduction;other biological processes	plasma membrane;other membranes;other cell component	signal transduction activity or receptor binding;other molecular function	Pf00503	14681	ENSMUSG00000031748	Gnao1	mmu:14681; P18872; P18873	Ca2+ pathway	G protein signaling pathways; Calcium regulation in cardiac cells	3	2	1.802	1
407	High	Master Protein	O89053	Coronin-1A [OS=Mus musculus]	0	25.858	17	7	15	7	461	51	6.48	19.27	7	cell adhesion;cell cycle OR cell proliferation;cell organization and biogenesis;stress response;transport;signal transduction;other biological processes	plasma membrane;other membranes;cytosol;cytoskeleton;other cytoplasmic organelle;other cell component	cytoskeletal activity;other molecular function	Pf00400, Pf08953, Pf08954, Pf16300	12721	ENSMUSG00000030707	Coro1a	mmu:12721; O89053; Q7TMU0; Q9R1Y8; Q9R288			0	0	1.795	1
408	High	Master Protein	Q01853	Transitional endoplasmic reticulum ATPase [OS=Mus musculus]	0	12.068	4	4	7	4	806	89.3	5.26	9.45	4	cell cycle OR cell proliferation;cell organization and biogenesis;protein metabolism;DNA metabolism;other metabolic processes;stress response;transport;other biological processes	other membranes;cytosol;ER/Golgi;nucleus;other cell component	signal transduction activity or receptor binding;enzyme regulator activity;other molecular function	Pf00004, Pf02359, Pf02933, Pf09336, Pf17862	269523	ENSMUSG00000028452	Vcp	mmu:269523; Q01853; Q3TFH9; Q3TIM2; Q3TXN9; Q6PI18; Q8BSR6; Q8CEG4	RHOH GTPase cycle; Neutrophil degranulation; Protein methylation; Ovarian tumor domain proteases; Neddylation; ABC-family proteins mediated transport; Translesion Synthesis by POLH; Hedgehog ligand biogenesis; KEAP1-NFE2L2 pathway; HSF1 activation; N-glycan trimming in the ER and Calnexin/Calreticulin cycle; Josephin domain DUBs		12	0	1.792	1
409	High	Master Protein	P68368	Tubulin alpha-4A chain [OS=Mus musculus]	0	239.423	53	19	177	4	448	49.9	5.06	605.45	19	cell cycle OR cell proliferation;cell organization and biogenesis	cytoskeleton;other cell component	cytoskeletal activity;other molecular function	Pf00091, Pf03953	22145	ENSMUSG00000026202	Tuba4a	mmu:22145; P05215; P68368; Q3TY31	Platelet degranulation ; Separation of Sister Chromatids; Regulation of PLK1 Activity at G2/M Transition; The role of GTSE1 in G2/M progression after G2 checkpoint; Aggrephagy; MHC class II antigen presentation; COPI-dependent Golgi-to-ER retrograde traffic; Kinesins; COPI-mediated anterograde transport; Anchoring of the basal body to the plasma membrane; Resolution of Sister Chromatid Cohesion; …		29	0	1.787	1
410	High	Master Protein	Q9CZ13	Cytochrome b-c1 complex subunit 1, mitochondrial [OS=Mus musculus]	0	63.572	25	10	27	10	480	52.8	6.21	74.05	10	cell organization and biogenesis;other metabolic processes;other biological processes	other membranes;mitochondrion	other molecular function	Pf00675, Pf05193	22273	ENSMUSG00000025651	Uqcrc1	mmu:22273; Q3TV75; Q9CWL6; Q9CZ13	Respiratory electron transport	Electron transport chain	2	0	1.784	1
411	High	Master Protein	P60710	Actin, cytoplasmic 1 [OS=Mus musculus]	0	235.73	67	23	201	11	375	41.7	5.48	457.49	23	cell organization and biogenesis;protein metabolism;other metabolic processes;developmental processes;other biological processes	plasma membrane;other membranes;cytosol;cytoskeleton;nucleus;other cell component	cytoskeletal activity;other molecular function	Pf00022	11461	ENSMUSG00000029580	Actb	mmu:11461; P02570; P60710; P70514; P99021; Q11211; Q3TI89; Q3TVP6; Q64316; Q6ZWM3	EPHB-mediated forward signaling; Regulation of actin dynamics for phagocytic cup formation; RHOBTB2 GTPase cycle; Interaction between L1 and Ankyrins; MAP2K and MAPK activation; RHO GTPases Activate Formins; Recycling pathway of L1; RHO GTPases activate IQGAPs; Clathrin-mediated endocytosis; Adherens junctions interactions; Formation of annular gap junctions; VEGFA-VEGFR2 Pathway; Cell-extracellu…	Myometrial relaxation and contraction pathways; Regulation of actin cytoskeleton; Focal adhesion	18	16	1.784	1
412	High	Master Protein	P14152	Malate dehydrogenase, cytoplasmic [OS=Mus musculus]	0	51.12	35	10	38	10	334	36.5	6.58	98.94	10	other metabolic processes	cytosol;cytoskeleton;other cell component	other molecular function	Pf00056, Pf02866	17449	ENSMUSG00000020321	Mdh1	mmu:17449; P14152; Q3TP22; Q80Y13; Q9DB45	Gluconeogenesis	Glycolysis and gluconeogenesis; TCA cycle	3	0	1.778	1
413	High	Master Protein	Q9D6F9	Tubulin beta-4A chain [OS=Mus musculus]	0	365.191	68	27	450	8	444	49.6	4.88	1321.43	27	cell cycle OR cell proliferation;cell organization and biogenesis;other biological processes	cytoskeleton;other cell component	cytoskeletal activity;other molecular function	Pf00091, Pf03953	22153	ENSMUSG00000062591	Tubb4a	mmu:22153; Q62364; Q80Y54; Q9D6F9	Recycling pathway of L1; MHC class II antigen presentation; COPI-mediated anterograde transport; HSP90 chaperone cycle for steroid hormone receptors (SHR) in the presence of ligand; COPI-independent Golgi-to-ER retrograde traffic; Separation of Sister Chromatids; Resolution of Sister Chromatid Cohesion; RHO GTPases Activate Formins; EML4 and NUDC in mitotic spindle formation; COPI-dependent Golgi…	Exercise-induced circadian regulation	29	0	1.773	1
414	High	Master Protein	Q9R0P3	S-formylglutathione hydrolase [OS=Mus musculus]	0	30.779	31	5	10	5	282	31.3	7.12	29.62	5	other metabolic processes	cytosol;other cell component	other molecular function	Pf00756	13885	ENSMUSG00000021996	Esd	mmu:13885; Q80ZX4; Q9CWI4; Q9R0P3	Glutathione conjugation		1	0	1.772	1
415	High	Master Protein	Q9WV34	MAGUK p55 subfamily member 2 [OS=Mus musculus]	0	15.557	9	4	8	4	552	61.5	6.44	10.75	4	cell-cell signaling;cell organization and biogenesis;signal transduction;other biological processes	plasma membrane;other membranes;cytoskeleton;other cell component	other molecular function	Pf00595, Pf00625, Pf02828, Pf07653	50997	ENSMUSG00000017314	Mpp2	B1AQF8; mmu:50997; Q3T9W1; Q3TT52; Q3URK8; Q9WV34			0	0	1.77	1
416	High	Master Protein	B2RSH2	Guanine nucleotide-binding protein G(i) subunit alpha-1 [OS=Mus musculus]	0	55.887	38	11	34	9	354	40.3	5.97	76.85	11	cell cycle OR cell proliferation;signal transduction;other biological processes	plasma membrane;other membranes;cytoskeleton;nucleus;other cell component	signal transduction activity or receptor binding;other molecular function	Pf00503	14677	ENSMUSG00000057614	Gnai1	B2RSH2; mmu:14677	G alpha (i) signalling events; Adenylate cyclase inhibitory pathway; ADP signalling through P2Y purinoceptor 12; Adrenaline,noradrenaline inhibits insulin secretion; Extra-nuclear estrogen signaling	Chemokine signaling pathway; G protein signaling pathways; Calcium regulation in cardiac cells; Signal transduction of S1P receptor	9	0	1.769	1
417	High	Master Protein	O08553	Dihydropyrimidinase-related protein 2 [OS=Mus musculus]	0	169.631	46	21	93	17	572	62.2	6.38	291.9	21	cell organization and biogenesis;transport;developmental processes;other biological processes	plasma membrane;other membranes;cytosol;cytoskeleton;other cell component	other molecular function	Pf01979	12934	ENSMUSG00000022048	Dpysl2	mmu:12934; O08553; Q6P5D0	Recycling pathway of L1; CRMPs in Sema3A signaling	Mechanisms associated with pluripotency	3	1	1.768	1
418	High	Master Protein	Q9CZU6	Citrate synthase, mitochondrial [OS=Mus musculus]	0	35.477	19	8	31	8	464	51.7	8.57	36.15	8	other metabolic processes	mitochondrion	other molecular function	Pf00285	12974	ENSMUSG00000005683	Cs	mmu:12974; Q3UDP3; Q9CZU6	Citric acid cycle (TCA cycle)	TCA cycle	2	0	1.765	1
419	High	Master Protein	Q8BYI9	Tenascin-R [OS=Mus musculus]	0	390.989	39	43	333	43	1358	149.5	4.94	1010.41	43	cell adhesion;cell-cell signaling;cell organization and biogenesis;stress response;developmental processes;other biological processes	non-structural extracellular;extracellular matrix;other membranes;other cell component	signal transduction activity or receptor binding;other molecular function	Pf00041, Pf00147, Pf18720	21960	ENSMUSG00000015829	Tnr	A2RT70; mmu:21960; O88717; Q8BYI9	ECM proteoglycans	Focal adhesion: PI3K-Akt-mTOR signaling pathway; Focal adhesion	3	0	1.765	1
420	High	Master Protein	Q9WUA3	ATP-dependent 6-phosphofructokinase, platelet type [OS=Mus musculus]	0	83.081	21	14	35	12	784	85.4	7.11	95.9	14	other metabolic processes;other biological processes	other membranes;cytosol;other cell component	kinase activity;other molecular function	Pf00365	56421	ENSMUSG00000021196	Pfkp	mmu:56421; Q3TNA9; Q3U4P1; Q3U7G4; Q4KUG1; Q543K8; Q8C5I6; Q9JI86; Q9WUA3	Glycolysis	Glycolysis and gluconeogenesis	2	0	1.762	1
421	High	Master Protein	Q9D8E6	60S ribosomal protein L4 [OS=Mus musculus]	0	16.557	10	5	15	5	419	47.1	11	17.08	5	cell organization and biogenesis;protein metabolism;other metabolic processes;other biological processes	cytosol;cytoskeleton;ER/Golgi;translational apparatus;nucleus;other cell component	nucleic acid binding activity;other molecular function	Pf00573, Pf14374	67891	ENSMUSG00000032399	Rpl4	mmu:67891; Q9CY08; Q9D8E6	L13a-mediated translational silencing of Ceruloplasmin expression; SRP-dependent cotranslational protein targeting to membrane; Major pathway of rRNA processing in the nucleolus and cytosol; Formation of a pool of free 40S subunits; GTP hydrolysis and joining of the 60S ribosomal subunit; Nonsense Mediated Decay (NMD) independent of the Exon Junction Complex (EJC); Nonsense Mediated Decay (NMD) e…	Cytoplasmic ribosomal proteins	8	0	1.75	1
422	High	Master Protein	P56399	Ubiquitin carboxyl-terminal hydrolase 5 [OS=Mus musculus]	0	13.961	6	5	5	5	858	95.8	5.01	4.96	5	protein metabolism;other metabolic processes;other biological processes	cytosol;nucleus	other molecular function	Pf00443, Pf00627, Pf02148, Pf17807	22225	ENSMUSG00000038429	Usp5	mmu:22225; P56399	Ub-specific processing proteases; Synthesis of active ubiquitin: roles of E1 and E2 enzymes		2	0	1.749	1
423	High	Master Protein	Q9D2P8	Myelin-associated oligodendrocyte basic protein [OS=Mus musculus]	0	22.509	35	5	26	5	170	19.2	11.14	31.85	5	cell organization and biogenesis;developmental processes	cytosol;mitochondrion;other cell component	other molecular function	Pf02318	17433	ENSMUSG00000032517	Mobp	mmu:17433; O35713; Q792D7; Q792D8; Q9D2P8; Q9JLY4; Q9JLY5; Q9JLY6			0	0	1.74	1
424	High	Master Protein	Q9CR95	Adaptin ear-binding coat-associated protein 1 [OS=Mus musculus]	0	18.98	15	4	8	4	275	29.6	6.38	12.72	4	transport	plasma membrane;other membranes;other cell component		Pf07933	67602	ENSMUSG00000030327	Necap1	mmu:67602; Q3TH13; Q78JW3; Q8C4P1; Q9CR95	Cargo recognition for clathrin-mediated endocytosis; Golgi Associated Vesicle Biogenesis		3	0	1.732	1
425	High	Master Protein	Q68FD5	Clathrin heavy chain 1 [OS=Mus musculus]	0	523.817	52	74	296	74	1675	191.4	5.69	863.43	74	cell cycle OR cell proliferation;cell organization and biogenesis;other metabolic processes;transport;other biological processes	plasma membrane;other membranes;cytosol;cytoskeleton;ER/Golgi;nucleus;other cytoplasmic organelle;other cell component	signal transduction activity or receptor binding;cytoskeletal activity;nucleic acid binding activity;other molecular function	Pf00637, Pf01394, Pf09268, Pf13838	67300	ENSMUSG00000047126	Cltc	mmu:67300; Q68FD5	Recycling pathway of L1; Golgi Associated Vesicle Biogenesis; MHC class II antigen presentation; Lysosome Vesicle Biogenesis; Cargo recognition for clathrin-mediated endocytosis; RHOU GTPase cycle; LDL clearance; RHOV GTPase cycle; Retrograde neurotrophin signalling; Formation of annular gap junctions; WNT5A-dependent internalization of FZD4; WNT5A-dependent internalization of FZD2, FZD5 and ROR2…	IL-7 signaling pathway; Kit receptor signaling pathway	17	0	1.724	1
426	High	Master Protein	Q6PIC6	Sodium/potassium-transporting ATPase subunit alpha-3 [OS=Mus musculus]	0	310.595	45	42	248	25	1013	111.6	5.41	693.49	42	cell organization and biogenesis;transport;signal transduction;other biological processes	plasma membrane;other membranes;ER/Golgi;nucleus;other cell component	signal transduction activity or receptor binding;transporter activity;other molecular function	Pf00122, Pf00689, Pf00690, Pf13246	232975	ENSMUSG00000040907	Atp1a3	mmu:232975; Q6PIC6	Ion homeostasis; Ion transport by P-type ATPases		2	19	1.721	1
427	High	Master Protein	P63328	Protein phosphatase 3 catalytic subunit alpha [OS=Mus musculus]	0	42.301	22	10	26	6	521	58.6	5.86	46.26	10	cell-cell signaling;cell cycle OR cell proliferation;cell organization and biogenesis;protein metabolism;other metabolic processes;stress response;transport;developmental processes;signal transduction;other biological processes	plasma membrane;other membranes;cytosol;cytoskeleton;mitochondrion;nucleus;other cell component	other molecular function	Pf00149	19055	ENSMUSG00000028161	Ppp3ca	B2RRX2; mmu:19055; P12816; P20652; P63328; Q3UCU1; Q64135	FCERI mediated Ca+2 mobilization; Ca2+ pathway; Calcineurin activates NFAT; CLEC7A (Dectin-1) induces NFAT activation	Mitochondrial gene expression; MicroRNAs in cardiomyocyte hypertrophy; Alzheimer's disease; Serotonin and anxiety; G protein signaling pathways; Spinal cord injury; Mapk signaling pathway	11	2	1.709	1
428	High	Master Protein	P62812	Gamma-aminobutyric acid receptor subunit alpha-1 [OS=Mus musculus]	0	34.074	19	8	29	6	455	51.7	9.31	29.84	8	cell-cell signaling;cell organization and biogenesis;transport;developmental processes;signal transduction;other biological processes	plasma membrane;other membranes;other cell component	transporter activity;other molecular function	Pf02931, Pf02932	14394	ENSMUSG00000010803	Gabra1	mmu:14394; P18504; P62812	GABA receptor activation	Serotonin and anxiety	2	2	1.69	1
429	High	Master Protein	O08709	Peroxiredoxin-6 [OS=Mus musculus]	0	46.051	41	7	23	7	224	24.9	6.01	58.87	7	cell organization and biogenesis;other metabolic processes;stress response;other biological processes	cytosol;nucleus;other cytoplasmic organelle;other cell component	other molecular function	Pf00578, Pf10417	11758		Prdx6	mmu:11758; O08709; Q91WT2; Q9QWP4; Q9QWW0	Neutrophil degranulation; Detoxification of Reactive Oxygen Species		2	0	1.688	1
430	High	Master Protein	O88342	WD repeat-containing protein 1 [OS=Mus musculus]	0	75.302	29	12	35	12	606	66.4	6.6	96.22	12	cell organization and biogenesis;other biological processes	plasma membrane;other membranes;cytoskeleton;other cell component	cytoskeletal activity	Pf00400	22388	ENSMUSG00000005103	Wdr1	mmu:22388; O88342	Platelet degranulation	Hypertrophy model	2	0	1.687	1
431	High	Master Protein	Q9EQF6	Dihydropyrimidinase-related protein 5 [OS=Mus musculus]	0	83.95	31	17	51	17	564	61.5	7.09	82.85	17	cell organization and biogenesis;developmental processes;other biological processes	cytosol;other cell component	other molecular function	Pf01979	65254	ENSMUSG00000029168	Dpysl5	mmu:65254; Q9EQF6	CRMPs in Sema3A signaling		1	0	1.677	1
432	High	Master Protein	P26048	Gamma-aminobutyric acid receptor subunit alpha-2 [OS=Mus musculus]	0	36.191	22	7	25	5	451	51.1	9.06	35.15	7	cell-cell signaling;cell organization and biogenesis;transport;developmental processes;signal transduction;other biological processes	plasma membrane;other membranes;ER/Golgi;other cell component	transporter activity;other molecular function	Pf02931, Pf02932	14395	ENSMUSG00000000560	Gabra2	mmu:14395; P26048	GABA receptor activation		1	0	1.673	1
433	High	Master Protein	P48774	Glutathione S-transferase Mu 5 [OS=Mus musculus]	0	35.443	45	9	25	8	224	26.6	7.21	47.77	9	other metabolic processes;stress response;other biological processes	cytosol;cytoskeleton;other cell component	other molecular function	Pf00043, Pf02798	14866	ENSMUSG00000004032	Gstm5	mmu:14866; P48774; Q545W5	Glutathione conjugation	Metapathway biotransformation; Oxidative stress and redox pathway	3	1	1.671	1
434	High	Master Protein	Q9QYR6	Microtubule-associated protein 1A [OS=Mus musculus]	0	22.934	3	5	8	5	2776	300	5	4.75	5	cell organization and biogenesis;transport;developmental processes;other biological processes	cytosol;cytoskeleton;other cell component	signal transduction activity or receptor binding;cytoskeletal activity;other molecular function		17754	ENSMUSG00000027254	Map1a	A2ARN9; mmu:17754; Q3TQM8; Q3TUV8; Q3UHB7; Q9QYR6; Q9QZH9; Q9QZI0; Q9QZI1			0	0	1.668	1
435	High	Master Protein	Q04447	Creatine kinase B-type [OS=Mus musculus]	0	84.18	47	14	54	14	381	42.7	5.67	153.34	14	other metabolic processes;developmental processes;other biological processes	plasma membrane;other membranes;cytosol;mitochondrion;nucleus;other cell component	kinase activity;other molecular function	Pf00217, Pf02807	12709	ENSMUSG00000001270	Ckb	mmu:12709; Q04447; Q3KQP4; Q3TKI3; Q3U5P5; Q3UF71; Q9CXK6	RND3 GTPase cycle; Creatine metabolism		2	0	1.664	1
436	High	Master Protein	Q8K377	Leucine-rich repeat transmembrane neuronal protein 1 [OS=Mus musculus]	0	18.138	9	5	9	5	522	58.7	7.11	23.06	5	cell organization and biogenesis;transport;other biological processes	non-structural extracellular;extracellular matrix;plasma membrane;other membranes;ER/Golgi;other cell component		Pf13855	74342	ENSMUSG00000060780	Lrrtm1	mmu:74342; Q3UVX1; Q8K377	Neurexins and neuroligins		1	0	1.66	1
437	High	Master Protein	Q8VDN2	Sodium/potassium-transporting ATPase subunit alpha-1 [OS=Mus musculus]	0	203.478	35	33	157	18	1023	112.9	5.45	405.87	33	transport;other biological processes	plasma membrane;other membranes;cytoskeleton;ER/Golgi;other cytoplasmic organelle;other cell component	transporter activity;cytoskeletal activity;other molecular function	Pf00122, Pf00689, Pf00690, Pf00702, Pf13246	11928	ENSMUSG00000033161	Atp1a1	mmu:11928; Q8VDN2; Q91Z09	Ion homeostasis; Ion transport by P-type ATPases		2	1	1.657	1
438	High	Master Protein	P45376	Aldo-keto reductase family 1 member B1 [OS=Mus musculus]	0	9.85	14	5	11	5	316	35.7	7.18	12.07	5	other metabolic processes;stress response;developmental processes;signal transduction;other biological processes	non-structural extracellular;cytosol;nucleus;other cytoplasmic organelle;other cell component	other molecular function	Pf00248	11677	ENSMUSG00000001642	Akr1b1	mmu:11677; O70130; P45376; Q99KC9	Pregnenolone biosynthesis; Fructose biosynthesis	Metapathway biotransformation; Polyol pathway; Eicosanoid metabolism via cyclooxygenases (COX)	5	0	1.652	1
439	High	Master Protein	Q62188	Dihydropyrimidinase-related protein 3 [OS=Mus musculus]	0	52.809	18	8	32	4	570	61.9	6.49	70.42	8	cell organization and biogenesis;stress response;developmental processes;other biological processes	non-structural extracellular;cytosol;cytoskeleton;ER/Golgi;other cell component	cytoskeletal activity;other molecular function	Pf01979	22240	ENSMUSG00000024501	Dpysl3	mmu:22240; Q62188	CRMPs in Sema3A signaling		1	0	1.649	1
440	High	Master Protein	P17742	Peptidyl-prolyl cis-trans isomerase A [OS=Mus musculus]	0	44.164	43	8	28	8	164	18	7.9	63.51	8	cell adhesion;cell organization and biogenesis;protein metabolism;other metabolic processes;stress response;developmental processes;other biological processes	non-structural extracellular;cytosol;nucleus;other cell component	signal transduction activity or receptor binding;other molecular function	Pf00160	268373	ENSMUSG00000071866	Ppia	mmu:268373; P17742; Q9CWJ5; Q9R137	Neutrophil degranulation		1	0	1.649	1
441	High	Master Protein	P17751	Triosephosphate isomerase [OS=Mus musculus]	0	55.14	52	11	27	11	249	26.7	7.3	48.78	11	other metabolic processes	cytosol;nucleus	other molecular function	Pf00121	21991	ENSMUSG00000023456	Tpi1	mmu:21991; P17751; Q3TJH2; Q3UC04; Q3UKG9; Q64513; Q9CVF9; Q9CWE7	Gluconeogenesis; Glycolysis	Fatty acid beta-oxidation; Glycolysis and gluconeogenesis	4	0	1.647	1
442	High	Master Protein	Q9D8N0	Elongation factor 1-gamma [OS=Mus musculus]	0	44.494	24	11	31	11	437	50	6.74	64.89	11	protein metabolism;other metabolic processes;other biological processes	ER/Golgi;nucleus;other cell component	nucleic acid binding activity	Pf00043, Pf00647, Pf02798	67160	ENSMUSG00000071644	Eef1g	mmu:67160; Q920C5; Q9CRT5; Q9CSU3; Q9D004; Q9D8N0	Eukaryotic Translation Elongation	Translation factors	2	0	1.639	1
443	High	Master Protein	Q11011	Puromycin-sensitive aminopeptidase [OS=Mus musculus]	0	24.742	8	6	12	6	920	103.3	5.9	20.99	6	protein metabolism;other metabolic processes;stress response	cytosol;nucleus;other cell component	other molecular function	Pf01433, Pf11838, Pf17900	19155	ENSMUSG00000001441	Npepps	mmu:19155; Q11011; Q3UZE0; Q5PR74; Q91VJ8	Antigen processing: Ubiquitination & Proteasome degradation		1	0	1.637	1
444	High	Master Protein	Q9Z0E0	Neurochondrin [OS=Mus musculus]	0	82.829	30	16	44	16	729	78.8	5.54	95.38	16	cell organization and biogenesis;developmental processes;other biological processes	other membranes;cytosol;other cytoplasmic organelle;other cell component		Pf05536	26562	ENSMUSG00000028833	Ncdn	mmu:26562; Q3TCW4; Q80TW1; Q91YH7; Q9CW81; Q9QUQ0; Q9Z0E0		Splicing factor NOVA regulated synaptic proteins	1	0	1.631	1
445	High	Master Protein	P04370	Myelin basic protein [OS=Mus musculus]	0	72.33	19	6	63	6	250	27.2	9.58	137.06	6	cell organization and biogenesis;developmental processes;signal transduction;other biological processes	plasma membrane;other membranes;nucleus;other cell component	other molecular function	Pf01669	17196	ENSMUSG00000041607	Mbp	mmu:17196; P04370; Q01585; Q03139; Q03176; Q61836; Q61837; Q99KE4; Q9QWP1		Neural crest differentiation; Spinal cord injury; Mapk cascade	3	0	1.627	1
446	High	Master Protein	P62631	Elongation factor 1-alpha 2 [OS=Mus musculus]	0	86.696	43	16	63	7	463	50.4	9.03	148.83	16	protein metabolism;other metabolic processes;other biological processes	nucleus;other cell component	nucleic acid binding activity;other molecular function	Pf00009, Pf03143, Pf03144	13628	ENSMUSG00000016349	Eef1a2	mmu:13628; P27706; P62631		Translation factors	1	0	1.612	1
447	High	Master Protein	Q62167	ATP-dependent RNA helicase DDX3X [OS=Mus musculus]	0	14.2	7	5	7	5	662	73.1	7.18	13.11	5	cell-cell signaling;cell cycle OR cell proliferation;cell organization and biogenesis;protein metabolism;RNA metabolism OR transcription;other metabolic processes;stress response;signal transduction;other biological processes	plasma membrane;other membranes;cytosol;cytoskeleton;translational apparatus;nucleus;other cell component	enzyme regulator activity;cytoskeletal activity;translation activity;nucleic acid binding activity;other molecular function	Pf00270, Pf00271	13205	ENSMUSG00000000787	Ddx3x	mmu:13205; O09060; O09143; Q62167	Neutrophil degranulation	mRNA processing	2	0	1.608	1
448	High	Master Protein	Q9R0P9	Ubiquitin carboxyl-terminal hydrolase isozyme L1 [OS=Mus musculus]	0	45.484	40	8	25	8	223	24.8	5.24	64.14	8	cell cycle OR cell proliferation;cell organization and biogenesis;protein metabolism;other metabolic processes;stress response;transport;developmental processes;other biological processes	plasma membrane;other membranes;cytosol;ER/Golgi;nucleus;other cell component	signal transduction activity or receptor binding;other molecular function	Pf01088	22223	ENSMUSG00000029223	Uchl1	mmu:22223; Q9R0P9; Q9R122	UCH proteinases	Parkinson's disease; Proteasome degradation	3	0	1.584	1
449	High	Master Protein	P30275	Creatine kinase U-type, mitochondrial [OS=Mus musculus]	0	15.82	11	4	10	4	418	47	8.16	16.19	4	other metabolic processes;other biological processes	other membranes;mitochondrion;other cell component	kinase activity;other molecular function	Pf00217, Pf02807	12716	ENSMUSG00000000308	Ckmt1	mmu:12716; P30275	Creatine metabolism		1	0	1.578	1
450	High	Master Protein	Q8VDQ8	NAD-dependent protein deacetylase sirtuin-2 [OS=Mus musculus]	0	31.476	18	5	8	5	389	43.2	5.35	30.37	5	cell cycle OR cell proliferation;cell organization and biogenesis;protein metabolism;other metabolic processes;stress response;developmental processes;other biological processes	plasma membrane;other membranes;cytosol;cytoskeleton;mitochondrion;nucleus;other cell component	other molecular function	Pf02146	64383	ENSMUSG00000015149	Sirt2	E9PXF5; mmu:64383; Q8VDQ8; Q9CXS5; Q9EQ18; Q9ERJ9; U5TP50	Initiation of Nuclear Envelope (NE) Reformation		1	0	1.576	1
451	High	Master Protein	Q80XN0	D-beta-hydroxybutyrate dehydrogenase, mitochondrial [OS=Mus musculus]	0	10.21	10	4	5	4	343	38.3	9.01	3.97	4	other metabolic processes	other membranes;mitochondrion;other cell component	other molecular function	Pf00106	71911	ENSMUSG00000046598	Bdh1	mmu:71911; Q3UJS9; Q3UL45; Q80XN0; Q8BK53; Q8R0C8	Synthesis of Ketone Bodies; Utilization of Ketone Bodies	Synthesis and degradation of ketone bodies	3	0	1.566	1
452	High	Master Protein	Q8BHN3	Neutral alpha-glucosidase AB [OS=Mus musculus]	0	72.295	19	14	26	14	944	106.8	6.06	82.12	14	protein metabolism;other metabolic processes	ER/Golgi;other cell component	other molecular function	Pf01055, Pf13802	14376	ENSMUSG00000071650	Ganab	mmu:14376; O08794; Q149A6; Q80U81; Q8BHN3; Q9CS53			0	0	1.566	1
453	High	Master Protein	Q921F2	TAR DNA-binding protein 43 [OS=Mus musculus]	0	18.382	16	5	13	5	414	44.5	6.7	25.25	5	cell organization and biogenesis;protein metabolism;RNA metabolism OR transcription;other metabolic processes;other biological processes	mitochondrion;nucleus;other cell component	nucleic acid binding activity;other molecular function	Pf00076, Pf18694	230908	ENSMUSG00000041459	Tardbp	mmu:230908; Q3U591; Q3V0E7; Q921F2		mRNA processing	1	0	1.502	1
454	High	Master Protein	Q61838	Pregnancy zone protein [OS=Mus musculus]	0	18.488	5	6	8	6	1495	165.7	6.68	8.52	6	developmental processes;other biological processes	non-structural extracellular	enzyme regulator activity;other molecular function	Pf00207, Pf01835, Pf07677, Pf07678, Pf07703, Pf17789, Pf17791		ENSMUSG00000030359	Pzp	E9QPW0; Q60628; Q61838; Q6PEM2			0	0	1.446	1
455	High	Master Protein	P28665	Murinoglobulin-1 [OS=Mus musculus]	0	37.771	8	9	12	9	1476	165.2	6.42	28.41	9	developmental processes;other biological processes	non-structural extracellular	enzyme regulator activity;other molecular function	Pf00207, Pf01835, Pf07677, Pf07678, Pf07703, Pf17789, Pf17791	17836	ENSMUSG00000059908	Mug1	mmu:17836; P28665; Q3UNE7; Q80XE6			0	0	1.429	1
456	High	Master Protein	Q8CAA7	Glucose 1,6-bisphosphate synthase [OS=Mus musculus]	0	18.435	7	4	7	4	621	70.2	6.49	15.3	4	other metabolic processes	cytosol	kinase activity;other molecular function	Pf00408, Pf02878, Pf02879, Pf02880	70974	ENSMUSG00000030729	Pgm2l1	mmu:70974; Q8CAA7	Glycolysis		1	0	1.418	1
457	High	Master Protein	Q8CI61	BAG family molecular chaperone regulator 4 [OS=Mus musculus]	0	35.134	14	6	21	6	457	49.1	5.34	42.54	6	cell organization and biogenesis;other biological processes	plasma membrane;other membranes;cytosol;nucleus;other cell component	other molecular function	Pf02179	67384	ENSMUSG00000037316	Bag4	mmu:67384; Q3TRL9; Q8CI61; Q91VT5; Q9CWG2	Regulation of HSF1-mediated heat shock response; TNF signaling	Oxidative damage response	3	0	1.4	1
458	High	Master Protein	D3Z7P3	Glutaminase kidney isoform, mitochondrial [OS=Mus musculus]	0	21.948	11	5	8	5	674	73.9	7.99	17.42	5	cell-cell signaling;cell organization and biogenesis;other metabolic processes;other biological processes	cytosol;mitochondrion;other cell component	other molecular function	Pf04960, Pf12796, Pf17959	14660	ENSMUSG00000026103	Gls	D3Z7P3; E9PUF0; mmu:14660; Q69ZX9	Glutamate Neurotransmitter Release Cycle; TP53 Regulates Metabolic Genes; Glutamate and glutamine metabolism	Oxidative stress and redox pathway	4	0	1.37	1
459	High	Master Protein	P15105	Glutamine synthetase [OS=Mus musculus]	0	200.494	50	25	185	25	373	42.1	7.08	506.21	25	cell cycle OR cell proliferation;protein metabolism;other metabolic processes;stress response;developmental processes;other biological processes	plasma membrane;other membranes;cytosol;ER/Golgi;other cell component	other molecular function	Pf00120, Pf03951	14645	ENSMUSG00000026473	Glul	mmu:14645; P15105; Q3TRK7; Q64432; Q91VC6	Glutamate and glutamine metabolism; Astrocytic Glutamate-Glutamine Uptake And Metabolism		2	0	1.347	1
460	High	Master Protein	Q9Z1G3	V-type proton ATPase subunit C 1 [OS=Mus musculus]	0	16.31	11	4	7	4	382	43.9	7.46	7.85	4	cell organization and biogenesis;transport	plasma membrane;other membranes;ER/Golgi;other cytoplasmic organelle;other cell component	transporter activity	Pf03223	66335	ENSMUSG00000022295	Atp6v1c1	mmu:66335; Q91Z42; Q9Z1G3	Insulin receptor recycling; Amino acids regulate mTORC1; ROS and RNS production in phagocytes; Transferrin endocytosis and recycling; Ion channel transport		5	0	1.339	1
461	High	Master Protein	Q9JM76	Actin-related protein 2/3 complex subunit 3 [OS=Mus musculus]	0	11.458	25	4	4	4	178	20.5	8.59	4.91	4	cell organization and biogenesis	cytoskeleton;nucleus;other cell component	cytoskeletal activity	Pf04062	56378	ENSMUSG00000029465	Arpc3	mmu:56378; Q3TAT0; Q9JM76	Regulation of actin dynamics for phagocytic cup formation; Clathrin-mediated endocytosis; EPHB-mediated forward signaling; RHO GTPases Activate WASPs and WAVEs	Comprehensive IL-17A signaling	5	0	1.312	1
462	High	Master Protein	O89112	Glutathione S-transferase LANCL1 [OS=Mus musculus]	0	29.799	21	7	17	7	399	45.3	7.77	29.42	7	other metabolic processes;other biological processes	plasma membrane;other membranes;other cell component	signal transduction activity or receptor binding;other molecular function	Pf05147	14768	ENSMUSG00000026000	Lancl1	mmu:14768; O89112			0	0	1.302	1
463	High	Master Protein	P35700	Peroxiredoxin-1 [OS=Mus musculus]	0	55.383	65	11	39	11	199	22.2	8.12	92.5	11	cell cycle OR cell proliferation;other metabolic processes;stress response;other biological processes	cytosol;mitochondrion;nucleus;other cytoplasmic organelle;other cell component	other molecular function	Pf00578, Pf10417	18477	ENSMUSG00000028691	Prdx1	mmu:18477; P35700; Q3UBV4; Q9CWI2	TP53 Regulates Metabolic Genes; Detoxification of Reactive Oxygen Species; NFE2L2 regulating anti-oxidant/detoxification enzymes	Oxidative stress and redox pathway	4	0	1.301	1
464	High	Master Protein	P06745	Glucose-6-phosphate isomerase [OS=Mus musculus]	0	48.889	24	9	28	9	558	62.7	8.13	64.21	9	other metabolic processes;stress response;developmental processes;signal transduction;other biological processes	plasma membrane;other membranes;cytosol;other cell component	signal transduction activity or receptor binding;other molecular function	Pf00342	14751	ENSMUSG00000036427	Gpi	mmu:14751; O89062; P06745; Q3TEE7; Q3TW50; Q3UUX1; Q3UY84; Q3UZJ1; Q5RJI3; Q8C675; Q9JM07	Glycolysis; Gluconeogenesis; Neutrophil degranulation; TP53 Regulates Metabolic Genes	Glycolysis and gluconeogenesis	5	0	1.298	1
465	High	Master Protein	P01029	Complement C4-B [OS=Mus musculus]	0	13.706	3	4	5	4	1738	192.8	7.53	9.53	4	stress response;other biological processes	non-structural extracellular;plasma membrane;other membranes;other cell component	enzyme regulator activity;other molecular function	Pf00207, Pf01759, Pf01821, Pf01835, Pf07677, Pf07678, Pf07703, Pf17791	12268	ENSMUSG00000073418	C4b	E9QKK7; mmu:12268; O70346; P01029; Q31201; Q3TYY1; Q3TZC9; Q61372; Q61859; Q62353; Q6NWV8	Regulation of Complement cascade; Initial triggering of complement; Regulation of Insulin-like Growth Factor (IGF) transport and uptake by Insulin-like Growth Factor Binding Proteins (IGFBPs); Post-translational protein phosphorylation; Activation of C3 and C5	SIDS susceptibility pathways; Oxidative damage response; Complement activation, classical pathway	8	0	1.297	1
466	High	Master Protein	Q80VP0	Tectonin beta-propeller repeat-containing protein 1 [OS=Mus musculus]	0	22.802	6	5	8	5	1166	130.2	6.48	5.21	5	cell organization and biogenesis;other metabolic processes;other biological processes	other membranes;nucleus;other cytoplasmic organelle;other cell component	other molecular function	Pf06398, Pf19193	70381	ENSMUSG00000066621	Tecpr1	mmu:70381; Q80VP0; Q8CHA3; Q8R3E0; Q99KQ5; Q9CVC6			0	0	1.294	1
467	High	Master Protein	Q9CX86	Heterogeneous nuclear ribonucleoprotein A0 [OS=Mus musculus]	0	56.887	42	11	47	9	305	30.5	9.31	99.42	11	stress response;other biological processes	nucleus;other cell component	nucleic acid binding activity;other molecular function	Pf00076	77134	ENSMUSG00000007836	Hnrnpa0	mmu:77134; Q9CX86		mRNA processing	1	0	1.226	1
468	High	Master Protein	Q62277	Synaptophysin [OS=Mus musculus]	0	31.066	11	4	42	4	314	34	4.94	71.17	4	cell-cell signaling;transport;other biological processes	plasma membrane;other membranes;ER/Golgi;other cell component	other molecular function	Pf01284	20977	ENSMUSG00000031144	Syp	mmu:20977; Q62277; Q8BRQ0; Q91WI8			0	0	1.224	1
469	High	Master Protein	Q61171	Peroxiredoxin-2 [OS=Mus musculus]	0	37.35	37	7	25	7	198	21.8	5.41	78.45	7	cell cycle OR cell proliferation;other metabolic processes;stress response;developmental processes;signal transduction;other biological processes	cytosol	other molecular function	Pf00578, Pf10417	21672	ENSMUSG00000005161	Prdx2	mmu:21672; O88376; Q60796; Q61171; Q9CWJ4; Q9DB49	TP53 Regulates Metabolic Genes; Detoxification of Reactive Oxygen Species	Oxidative stress and redox pathway	3	0	1.218	1
470	High	Master Protein	P00920	Carbonic anhydrase 2 [OS=Mus musculus]	0	85.148	51	10	46	10	260	29	7.01	131.5	10	transport;signal transduction;other biological processes	non-structural extracellular;plasma membrane;other membranes;cytosol;other cell component	other molecular function	Pf00194	12349	ENSMUSG00000027562	Ca2	mmu:12349; P00920; Q6LDQ7; Q7TPE1; Q9DCT3; Q9DCY9	Erythrocytes take up carbon dioxide and release oxygen; Erythrocytes take up oxygen and release carbon dioxide; Reversible hydration of carbon dioxide		3	0	1.209	1
471	High	Master Protein	Q8C2Q3	RNA-binding protein 14 [OS=Mus musculus]	0	90.746	28	18	50	18	669	69.4	9.67	115.43	18	cell organization and biogenesis;RNA metabolism OR transcription;other metabolic processes;stress response;signal transduction;other biological processes	nucleus;other cell component	nucleic acid binding activity;other molecular function	Pf00076	56275	ENSMUSG00000006456	Rbm14	mmu:56275; Q3TJB6; Q8C2Q3; Q91Z21; Q9DBI6	RUNX2 regulates bone development	mRNA processing	2	0	1.201	1
472	High	Master Protein	P63080	Gamma-aminobutyric acid receptor subunit beta-3 [OS=Mus musculus]	0	42.27	19	9	25	9	473	54.1	9.1	68.7	9	cell-cell signaling;cell organization and biogenesis;transport;developmental processes;signal transduction;other biological processes	plasma membrane;other membranes;other cell component	transporter activity;other molecular function	Pf02931, Pf02932	14402	ENSMUSG00000033676	Gabrb3	mmu:14402; P15433; P63080; Q3UHR3	GABA receptor activation		1	0	1.19	1
473	High	Master Protein	Q8BKI2	Trinucleotide repeat-containing gene 6B protein [OS=Mus musculus]	0	59.042	10	12	23	12	1810	191.8	6.3	45.68	12	other biological processes	nucleus;other cell component	nucleic acid binding activity	Pf10427, Pf16608	213988	ENSMUSG00000047888	Tnrc6b	mmu:213988; Q80TK4; Q8BKI2	Post-transcriptional silencing by small RNAs		1	0	1.182	1
474	High	Master Protein	P49312	Heterogeneous nuclear ribonucleoprotein A1 [OS=Mus musculus]	0	209.044	59	22	143	18	320	34.2	9.23	397.16	22	RNA metabolism OR transcription;other metabolic processes;transport;other biological processes	cytosol;nucleus;other cell component	nucleic acid binding activity;other molecular function	Pf00076, Pf11627	15382	ENSMUSG00000046434	Hnrnpa1	mmu:15382; P49312; P97312; Q3V269	mRNA Splicing - Major Pathway; Processing of Capped Intron-Containing Pre-mRNA; FGFR2 alternative splicing	mRNA processing	4	0	1.182	1
475	High	Master Protein	Q8BG05	Heterogeneous nuclear ribonucleoprotein A3 [OS=Mus musculus]	0	429.026	49	31	339	29	379	39.6	9.01	1075.98	31	RNA metabolism OR transcription;other metabolic processes;transport	nucleus;other cell component	transporter activity;nucleic acid binding activity	Pf00076	229279	ENSMUSG00000059005	Hnrnpa3	mmu:229279; Q8BG05; Q8BHF8	mRNA Splicing - Major Pathway; Processing of Capped Intron-Containing Pre-mRNA	mRNA processing	3	0	1.174	1
476	High	Master Protein	P15209	BDNF/NT-3 growth factors receptor [OS=Mus musculus]	0	69.515	19	11	33	11	821	92.1	6.55	66.39	11	cell-cell signaling;protein metabolism;other metabolic processes;transport;developmental processes;signal transduction;other biological processes	plasma membrane;other membranes;cytosol;ER/Golgi;other cytoplasmic organelle;other cell component	signal transduction activity or receptor binding;kinase activity;other molecular function	Pf07679, Pf07714, Pf13855, Pf16920	18212	ENSMUSG00000055254	Ntrk2	mmu:18212; P15209; Q3TUF9; Q80WU0; Q91XJ9	Activated NTRK2 signals through PLCG1; Activated NTRK2 signals through FRS2 and FRS3; NTRK2 activates RAC1	BDNF pathway	4	0	1.172	1
477	High	Master Protein	O35737	Heterogeneous nuclear ribonucleoprotein H [OS=Mus musculus]	0	129.164	41	13	84	6	449	49.2	6.3	284.72	13	RNA metabolism OR transcription;other metabolic processes;other biological processes	cytosol;nucleus;other cell component	nucleic acid binding activity;other molecular function	Pf00076, Pf08080	59013	ENSMUSG00000007850	Hnrnph1	mmu:59013; O35737	mRNA Splicing - Major Pathway; Processing of Capped Intron-Containing Pre-mRNA	mRNA processing	3	8	1.165	1
478	High	Master Protein	P21661	Neuroendocrine convertase 2 [OS=Mus musculus]	0	39.787	14	7	24	7	637	70.7	6.42	38.51	7	protein metabolism;other metabolic processes;developmental processes	non-structural extracellular;other membranes;ER/Golgi;nucleus;other cell component	other molecular function	Pf00082, Pf01483, Pf16470	18549	ENSMUSG00000027419	Pcsk2	mmu:18549; P21661; Q80WU1			0	0	1.152	1
479	High	Master Protein	P70318	Nucleolysin TIAR [OS=Mus musculus]	0	21.633	12	4	12	4	392	43.4	7.99	30.37	4	cell cycle OR cell proliferation;other biological processes	cytosol;nucleus;other cytoplasmic organelle;other cell component	nucleic acid binding activity;other molecular function	Pf00076	21843	ENSMUSG00000030846	Tial1	mmu:21843; P70318		mRNA processing	1	0	1.141	1
480	High	Master Protein	P70333	Heterogeneous nuclear ribonucleoprotein H2 [OS=Mus musculus]	0	147.083	37	11	96	5	449	49.2	6.3	288.81	11	other biological processes	cytosol;nucleus;other cell component	nucleic acid binding activity	Pf00076, Pf08080	56258	ENSMUSG00000045427	Hnrnph2	mmu:56258; P70333; Q3THV9	mRNA Splicing - Major Pathway; Processing of Capped Intron-Containing Pre-mRNA	mRNA processing	3	0	1.128	1
481	High	Master Protein	Q8VDM6	Heterogeneous nuclear ribonucleoprotein U-like protein 1 [OS=Mus musculus]	0	119.399	28	21	69	21	859	95.9	6.58	204.52	21		nucleus;other cell component	nucleic acid binding activity;other molecular function	Pf00622, Pf02037, Pf13671	232989	ENSMUSG00000040725	Hnrnpul1	mmu:232989; Q3U201; Q3UPB0; Q6AZA7; Q8BY45; Q8K365; Q8VDM6			0	0	1.107	1
482	High	Master Protein	Q7TMK9	Heterogeneous nuclear ribonucleoprotein Q [OS=Mus musculus]	0	29.689	11	8	43	8	623	69.6	8.59	71.96	8	RNA metabolism OR transcription;other metabolic processes;stress response;other biological processes	other membranes;cytosol;ER/Golgi;nucleus;other cell component	nucleic acid binding activity	Pf00076, Pf18360	56403	ENSMUSG00000032423	Syncrip	mmu:56403; O88991; Q2YDV8; Q68ED6; Q7TMK9; Q80YV6; Q8BGP1; Q8C5K6; Q8CGC2; Q91ZR0; Q99KU9; Q9QYF4		mRNA processing	1	0	1.103	1
483	High	Master Protein	O70133	ATP-dependent RNA helicase A [OS=Mus musculus]	0	257.939	32	41	179	41	1380	149.4	6.83	395.18	41	cell organization and biogenesis;RNA metabolism OR transcription;other metabolic processes;stress response;transport;other biological processes	cytosol;cytoskeleton;translational apparatus;nucleus;other cell component	translation activity;nucleic acid binding activity;other molecular function	Pf00035, Pf00270, Pf00271, Pf04408, Pf07717	13211		Dhx9	mmu:13211; O35931; O54703; O70133; Q5FWY1; Q6R5F7; Q9CSA2	mRNA Splicing - Major Pathway; RIP-mediated NFkB activation via ZBP1; DEx/H-box helicases activate type I IFN and inflammatory cytokines production	Mechanisms associated with pluripotency; mRNA processing	5	0	1.091	1
484	High	Master Protein	Q6GQU6	Leucine-rich repeat and immunoglobulin-like domain-containing nogo receptor-interacting protein 3 [OS=Mus musculus]	0	47.133	20	10	18	10	589	64.6	8.31	53.37	10		non-structural extracellular;extracellular matrix;other membranes		Pf07679, Pf13855	237403	ENSMUSG00000051067	Lingo3	E9QK50; mmu:237403; Q6GQU6			0	0	1.081	1
485	High	Master Protein	Q9Z130	Heterogeneous nuclear ribonucleoprotein D-like [OS=Mus musculus]	0	127.575	43	16	89	14	301	33.5	7.31	251.68	16	RNA metabolism OR transcription;other metabolic processes;other biological processes	nucleus;other cell component	nucleic acid binding activity	Pf00076			Hnrnpdl	Q9CT01; Q9Z130			0	0	1.077	1
486	High	Master Protein	P61979	Heterogeneous nuclear ribonucleoprotein K [OS=Mus musculus]	0	91.44	38	14	55	14	463	50.9	5.54	140.85	14	RNA metabolism OR transcription;other metabolic processes;developmental processes;other biological processes	other membranes;cytosol;cytoskeleton;mitochondrion;nucleus;other cell component	cytoskeletal activity;nucleic acid binding activity;other molecular function	Pf00013, Pf08067	15387	ENSMUSG00000021546	Hnrnpk	mmu:15387; P61979; Q07244; Q15671; Q60577; Q8BGQ8; Q922Y7; Q96J62	mRNA Splicing - Major Pathway; SUMOylation of RNA binding proteins; Processing of Capped Intron-Containing Pre-mRNA	mRNA processing	4	0	1.059	1
487	High	Master Protein	Q99020	Heterogeneous nuclear ribonucleoprotein A/B [OS=Mus musculus]	0	72.145	36	12	47	11	285	30.8	7.91	126.91	12	RNA metabolism OR transcription;other metabolic processes;other biological processes	cytosol;nucleus;other cell component	nucleic acid binding activity;other molecular function	Pf00076, Pf08143	15384	ENSMUSG00000020358	Hnrnpab	mmu:15384; Q8BPE0; Q99020		mRNA processing	1	0	1.049	1
488	High	Master Protein	E9QAT4	Protein transport protein Sec16A [OS=Mus musculus]	0	148.958	13	25	78	25	2357	254	5.81	127.9	25	cell organization and biogenesis;other metabolic processes;stress response;transport;other biological processes	other membranes;cytosol;ER/Golgi;other cell component		Pf12931, Pf12932	227648	ENSMUSG00000026924	Sec16a	A2AIX1; E9QAT4; mmu:227648; Q80U43; Q811L5	COPII-mediated vesicle transport		1	0	1.036	1
489	High	Master Protein	Q60668	Heterogeneous nuclear ribonucleoprotein D0 [OS=Mus musculus]	0	196.609	44	20	151	18	355	38.3	7.81	389.22	20	RNA metabolism OR transcription;other metabolic processes;developmental processes;other biological processes	cytosol;nucleus;other cell component	nucleic acid binding activity;other molecular function	Pf00076, Pf08143	11991	ENSMUSG00000000568	Hnrnpd	mmu:11991; Q60667; Q60668; Q80ZJ0; Q91X94	AUF1 (hnRNP D0) binds and destabilizes mRNA; mRNA Splicing - Major Pathway; Processing of Capped Intron-Containing Pre-mRNA	mRNA processing	4	2	1.024	1
490	High	Master Protein	P08775	DNA-directed RNA polymerase II subunit RPB1 [OS=Mus musculus]	0	89.72	14	21	57	21	1970	217	7.37	77.84	21	RNA metabolism OR transcription;other metabolic processes;other biological processes	nucleus;other cell component	nucleic acid binding activity;other molecular function	Pf00623, Pf04983, Pf04990, Pf04992, Pf04997, Pf04998, Pf05000, Pf05001	20020	ENSMUSG00000005198	Polr2a	mmu:20020; P08775; Q5F298	Formation of TC-NER Pre-Incision Complex; Dual incision in TC-NER; Gap-filling DNA repair synthesis and ligation in TC-NER; mRNA Splicing - Major Pathway; Formation of RNA Pol II elongation complex ; RNA Polymerase II Pre-transcription Events; Processing of Capped Intron-Containing Pre-mRNA; Estrogen-dependent gene expression; mRNA Splicing - Minor Pathway; RNA polymerase II transcribes snRNA gen…	Estrogen signaling; Purine metabolism; mRNA processing; Eukaryotic transcription initiation	24	0	1.022	1
491	High	Master Protein	O88569	Heterogeneous nuclear ribonucleoproteins A2/B1 [OS=Mus musculus]	0	379.667	63	32	526	28	353	37.4	8.95	1594.88	32	cell organization and biogenesis;DNA metabolism;RNA metabolism OR transcription;other metabolic processes;transport;other biological processes	non-structural extracellular;cytosol;nucleus;other cell component	nucleic acid binding activity;other molecular function	Pf00076, Pf11627	53379	ENSMUSG00000004980	Hnrnpa2b1	B9EJ02; mmu:53379; O88569; Q3UVJ5; Q6PCV9; Q8C2A0; Q8CJ71; Q91ZR9; Q9R204	mRNA Splicing - Major Pathway; Processing of Capped Intron-Containing Pre-mRNA	mRNA processing	3	4	1.003	1
492	High	Master Protein	Q9DBR0	A-kinase anchor protein 8 [OS=Mus musculus]	0	18.327	9	5	11	5	687	76.2	5.14	17.69	5	cell cycle OR cell proliferation;cell organization and biogenesis;stress response;transport;other biological processes	mitochondrion;ER/Golgi;nucleus;other cell component	nucleic acid binding activity;other molecular function	Pf04988	56399	ENSMUSG00000024045	Akap8	mmu:56399; Q9DBR0; Q9R0L8		G protein signaling pathways	1	0	0.998	1
493	High	Master Protein	P28798	Progranulin [OS=Mus musculus]	0	18.909	11	4	10	4	589	63.4	6.8	20.3	4	cell cycle OR cell proliferation;cell organization and biogenesis;protein metabolism;other metabolic processes;stress response;transport;developmental processes;signal transduction;other biological processes	non-structural extracellular;plasma membrane;other membranes;ER/Golgi;other cytoplasmic organelle;other cell component	signal transduction activity or receptor binding;other molecular function	Pf00396	14824	ENSMUSG00000034708	Grn	mmu:14824; P28798	Neutrophil degranulation		1	0	0.965	1
494	High	Master Protein	P01027	Complement C3 [OS=Mus musculus]	0	40.087	5	8	28	8	1663	186.4	6.73	75.84	8	cell-cell signaling;cell organization and biogenesis;protein metabolism;other metabolic processes;stress response;developmental processes;signal transduction;other biological processes	non-structural extracellular;plasma membrane;other membranes;other cell component	signal transduction activity or receptor binding;enzyme regulator activity;other molecular function	Pf00207, Pf01759, Pf01821, Pf01835, Pf07677, Pf07678, Pf07703, Pf17789, Pf17790, Pf17791	12266	ENSMUSG00000024164	C3	mmu:12266; P01027; Q61370; Q80XP1	Neutrophil degranulation; Regulation of Insulin-like Growth Factor (IGF) transport and uptake by Insulin-like Growth Factor Binding Proteins (IGFBPs); Post-translational protein phosphorylation; Immunoregulatory interactions between a Lymphoid and a non-Lymphoid cell; Regulation of Complement cascade; G alpha (i) signalling events; Peptide ligand-binding receptors; Alternative complement activati…	Complement activation, classical pathway; Tyrobp causal network in microglia; Comprehensive IL-17A signaling	12	0	0.938	1
495	High	Master Protein	Q9Z1X4	Interleukin enhancer-binding factor 3 [OS=Mus musculus]	0	263.899	36	34	187	34	898	96	8.76	422.65	34	protein metabolism;other metabolic processes;stress response;other biological processes	mitochondrion;nucleus;other cell component	nucleic acid binding activity;other molecular function	Pf00035, Pf07528	16201	ENSMUSG00000032178	Ilf3	mmu:16201; Q80VD5; Q812A1; Q8BP80; Q8C2H8; Q8K588; Q9Z1X4	Regulation of CDH11 gene transcription	mRNA processing	2	0	0.937	1
496	High	Master Protein	Q07076	Annexin A7 [OS=Mus musculus]	0	106.214	44	22	70	22	463	49.9	6.18	147.15	22	cell-cell signaling;cell cycle OR cell proliferation;cell organization and biogenesis;other metabolic processes;stress response;transport;developmental processes;signal transduction;other biological processes	plasma membrane;other membranes;cytosol;ER/Golgi;nucleus;other cell component	signal transduction activity or receptor binding;other molecular function	Pf00191	11750	ENSMUSG00000021814	Anxa7	mmu:11750; Q07076; Q3TT33			0	0	0.882	1
497	High	Master Protein	Q56A07	Sodium channel subunit beta-2 [OS=Mus musculus]	0	48.381	31	4	22	4	215	24.2	6.54	74.2	4	other metabolic processes;stress response;transport;developmental processes;other biological processes	plasma membrane;other membranes	transporter activity;other molecular function	Pf07686	72821	ENSMUSG00000070304	Scn2b	mmu:72821; Q56A07			0	0	0.87	1
498	High	Master Protein	Q9R0L7	A-kinase anchor protein 8-like [OS=Mus musculus]	0	61.47	21	10	37	10	642	71.4	5.05	86.91	10	cell cycle OR cell proliferation;cell organization and biogenesis;RNA metabolism OR transcription;other metabolic processes;other biological processes	nucleus;other cell component	nucleic acid binding activity;other molecular function	Pf04988			Akap8l	Q9R0L7	Formation of WDR5-containing histone-modifying complexes		1	0	0.841	1
499	High	Master Protein	Q7M729	Sodium channel subunit beta-4 [OS=Mus musculus]	0	17.723	19	4	15	4	228	25.2	8.82	28.04	4	cell-cell signaling;transport;other biological processes	plasma membrane;other membranes;other cell component	transporter activity;other molecular function	Pf07686	399548	ENSMUSG00000046480	Scn4b	mmu:399548; Q7M729			0	0	0.822	1
500	High	Master Protein	Q61545	RNA-binding protein EWS [OS=Mus musculus]	0	114.999	16	7	55	7	655	68.4	9.33	163.51	7	RNA metabolism OR transcription;other biological processes	plasma membrane;other membranes;nucleus;other cell component	nucleic acid binding activity;other molecular function	Pf00076, Pf00641	14030	ENSMUSG00000009079	Ewsr1	mmu:14030; Q61545; Q9D2P0		Mechanisms associated with pluripotency; mRNA processing	2	0	0.686	1
501	High	Master Protein	P56959	RNA-binding protein FUS [OS=Mus musculus]	0	179.941	17	11	138	11	518	52.6	9.36	450.28	11	cell organization and biogenesis;protein metabolism;RNA metabolism OR transcription;other metabolic processes;other biological processes	nucleus;other cell component	signal transduction activity or receptor binding;cytoskeletal activity;nucleic acid binding activity;other molecular function	Pf00076, Pf00641	233908	ENSMUSG00000030795	Fus	mmu:233908; P56959	mRNA Splicing - Major Pathway; Processing of Capped Intron-Containing Pre-mRNA	mRNA processing	3	0	0.616	1

## Sheet: NAPS-BmTyr_b2
Checked	Protein FDR Confidence: Combined	Master	Accession	Description	Exp. q-value: Combined	Sum PEP Score	Coverage [%]	# Peptides	# PSMs	# Unique Peptides	# AAs	MW [kDa]	calc. pI	Score Sequest HT: Sequest HT	# Peptides (by Search Engine): Sequest HT	Biological Process	Cellular Component	Molecular Function	Pfam IDs	Entrez Gene ID	Ensembl Gene ID	Gene Symbol	Gene ID	Reactome Pathways	WikiPathways	# Protein Pathway Groups	# Razor Peptides	Abundance Ratio: (mSPI) / (wt)	# Protein Groups
1	High	Master Protein	P05132	cAMP-dependent protein kinase catalytic subunit alpha [OS=Mus musculus]	0	69.814	44	14	42	4	351	40.5	8.79	74.06	14	cell-cell signaling;protein metabolism;RNA metabolism OR transcription;other metabolic processes;stress response;transport;developmental processes;signal transduction;other biological processes	plasma membrane;other membranes;cytosol;cytoskeleton;mitochondrion;ER/Golgi;nucleus;other cell component	enzyme regulator activity;kinase activity;other molecular function	Pf00069	18747	ENSMUSG00000005469	Prkaca	mmu:18747; P05132; Q9JID0	Anchoring of the basal body to the plasma membrane; Factors involved in megakaryocyte development and platelet production; Ion homeostasis; Regulation of PLK1 Activity at G2/M Transition; Loss of Nlp from mitotic centrosomes; Recruitment of mitotic centrosome proteins and complexes; Recruitment of NuMA to mitotic centrosomes; AURKA Activation by TPX2; Rap1 signalling; RET signaling; MAPK6/MAPK4 s…	Estrogen signaling; Endochondral ossification; Mechanisms associated with pluripotency; Chemokine signaling pathway; G protein signaling pathways; IL-3 signaling pathway; Mapk signaling pathway	33	0	1000	1
2	High	Master Protein	Q9WTS6	Teneurin-3 [OS=Mus musculus]	0	12.392	2	5	7	4	2715	302.9	6.51	5.58	5	cell adhesion;developmental processes;signal transduction;other biological processes	plasma membrane;other membranes;other cell component	other molecular function	Pf06484, Pf15636			Tenm3	A0A2K9QKY6; A0A2K9QKZ0; A0A2K9QL01; A0A2K9QL03; A0A2K9QL04; A0A2K9QL11; A0A2K9QL36; A0A2K9QL87; Q3UVR9; Q3UX72; Q80TD2; Q8BSL5; Q9CSV2; Q9JLC1; Q9WTS6			0	0	1000	1
3	High	Master Protein	Q9QYB8	Beta-adducin [OS=Mus musculus]	0	23.563	12	6	9	5	725	80.6	6.21	16.23	6	cell adhesion;cell organization and biogenesis;transport;developmental processes;other biological processes	plasma membrane;other membranes;cytoskeleton;other cell component	cytoskeletal activity;other molecular function	Pf00596	11519	ENSMUSG00000030000	Add2	mmu:11519; Q3U0E1; Q80VH9; Q8C1C4; Q9CXE3; Q9JLE4; Q9JLE5; Q9QYB7; Q9QYB8	Miscellaneous transport and binding events		1	0	1000	1
4	High	Master Protein	Q8BLQ9	Cell adhesion molecule 2 [OS=Mus musculus]	0	76.111	31	13	56	13	435	47.5	5.41	115.35	13	cell adhesion;developmental processes	plasma membrane;other membranes;other cell component		Pf07686, Pf08205, Pf13927	239857	ENSMUSG00000064115	Cadm2	B1B1A5; B1B1A6; B2RTL0; mmu:239857; Q8BLQ9; Q8BXJ7; Q8BYP1; Q8BZP4	Adherens junctions interactions		1	0	7.561	1
5	High	Master Protein	Q6V4S5	Protein sidekick-2 [OS=Mus musculus]	0	18.136	4	5	7	5	2176	239.8	7.36	5.25	5	cell adhesion;cell organization and biogenesis;developmental processes	plasma membrane;other membranes;other cell component		Pf00041, Pf07679, Pf13927	237979	ENSMUSG00000041592	Sdk2	mmu:237979; Q3TTK1; Q5U5W7; Q6V4S5; Q6ZPP2	SDK interactions		1	0	6.806	1
6	High	Master Protein	Q71M36	Chondroitin sulfate proteoglycan 5 [OS=Mus musculus]	0	15.717	8	4	15	4	566	60.4	4.54	12.59	4	cell organization and biogenesis;stress response;developmental processes;other biological processes	non-structural extracellular;plasma membrane;other membranes;ER/Golgi;other cell component		Pf06566, Pf06567	29873	ENSMUSG00000032482	Cspg5	E9QN54; mmu:29873; Q71M36; Q71M37; Q7TNT8; Q8BPJ5; Q9QY32	A tetrasaccharide linker sequence is required for GAG synthesis; Chondroitin sulfate biosynthesis; CS/DS degradation; Dermatan sulfate biosynthesis		4	0	6.744	1
7	High	Master Protein	Q14BI2	Metabotropic glutamate receptor 2 [OS=Mus musculus]	0	61.539	19	17	44	15	872	95.8	8.06	74.19	17	other metabolic processes;transport;signal transduction;other biological processes	plasma membrane;other membranes;other cell component	other molecular function	Pf00003, Pf01094, Pf07562	108068	ENSMUSG00000023192	Grm2	mmu:108068; Q14BI2	G alpha (i) signalling events; Class C/3 (Metabotropic glutamate/pheromone receptors)	GPCRs, non-odorant ; GPCRs, class C metabotropic glutamate, pheromone	4	0	6.273	1
8	High	Master Protein	Q8C3Q5	Protein shisa-7 [OS=Mus musculus]	0	26.325	12	6	13	6	558	58.3	9.82	23.32	6	cell-cell signaling;cell organization and biogenesis;other biological processes	plasma membrane;other membranes;other cell component	signal transduction activity or receptor binding	Pf13908	232813	ENSMUSG00000053550	Shisa7	A0A172Q401; A0A172Q418; mmu:232813; Q3UMB3; Q8C3Q5			0	0	6.129	1
9	High	Master Protein	P97797	Tyrosine-protein phosphatase non-receptor type substrate 1 [OS=Mus musculus]	0	75.96	27	11	40	11	513	56.4	8.28	82.02	11	cell adhesion;cell organization and biogenesis;stress response;transport;other biological processes	plasma membrane;other membranes;other cell component	enzyme regulator activity;other molecular function	Pf07654, Pf07686	19261	ENSMUSG00000037902	Sirpa	A0A0R4J1Z7; E0CYM8; E9QPT7; mmu:19261; O08907; O35924; O88555; O88556; P97796; P97797; Q8R559; Q9QX57; Q9WTN4	Cell surface interactions at the vascular wall; Neutrophil degranulation; DAP12 interactions; Signal regulatory protein family interactions	IL-1 signaling pathway	5	0	6.119	1
10	High	Master Protein	P23819	Glutamate receptor 2 [OS=Mus musculus]	0	145.379	32	25	64	21	883	98.6	7.39	128.25	25	cell-cell signaling;cell organization and biogenesis;transport;signal transduction;other biological processes	non-structural extracellular;plasma membrane;other membranes;ER/Golgi;other cell component	signal transduction activity or receptor binding;transporter activity;cytoskeletal activity;other molecular function	Pf00060, Pf01094, Pf10613			Gria2	P23819; Q61604; Q61605; Q8BG69; Q8BXU3; Q9D6D3	Trafficking of GluR2-containing AMPA receptors; Unblocking of NMDA receptors, glutamate binding and activation; Activation of AMPA receptors		3	3	5.84	1
11	High	Master Protein	Q9D1T0	Leucine-rich repeat and immunoglobulin-like domain-containing nogo receptor-interacting protein 1 [OS=Mus musculus]	0	51.897	21	9	20	9	614	69.1	8.31	42.25	9	cell organization and biogenesis;developmental processes;signal transduction;other biological processes	non-structural extracellular;extracellular matrix;plasma membrane;other membranes	signal transduction activity or receptor binding	Pf07679, Pf13855	235402	ENSMUSG00000049556	Lingo1	mmu:235402; Q3TQJ4; Q6VVF9; Q7TT38; Q9D1T0	Axonal growth inhibition (RHOA activation)	mRNA processing	2	0	5.792	1
12	High	Master Protein	Q60625	Intercellular adhesion molecule 5 [OS=Mus musculus]	0	40.965	11	8	28	8	917	96.9	6.32	57.68	8	cell adhesion;transport;other biological processes	plasma membrane;other membranes;other cell component	signal transduction activity or receptor binding	Pf03921, Pf13927	15898	ENSMUSG00000032174	Icam5	G5E826; mmu:15898; Q2KHL7; Q3UY19; Q60625	Immunoregulatory interactions between a Lymphoid and a non-Lymphoid cell; Integrin cell surface interactions		2	0	5.716	1
13	High	Master Protein	Q9R1V6	Disintegrin and metalloproteinase domain-containing protein 22 [OS=Mus musculus]	0	43.963	12	10	16	10	904	99.7	7.83	37.36	10	protein metabolism;developmental processes;other biological processes	plasma membrane;other membranes;other cell component	other molecular function	Pf00200, Pf01421, Pf01562, Pf07974, Pf08516	11496	ENSMUSG00000040537	Adam22	mmu:11496; Q5TLI8; Q5TLI9; Q5TLJ0; Q5TLJ1; Q5TLJ2; Q5TLJ3; Q5TLJ4; Q5TLJ5; Q5TLJ6; Q5TLJ7; Q5TLJ8; Q5TLJ9; Q5TLK0; Q5TLK1; Q5TLK2; Q5TLK3; Q5TLK4; Q5TLK5; Q5TLK6; Q5TLK7; Q5TLK8; Q8BSF2; Q9R1V5; Q9R1V6	LGI-ADAM interactions		1	0	5.713	1
14	High	Master Protein	Q61490	CD166 antigen [OS=Mus musculus]	0	173.233	48	22	98	22	583	65.1	6.15	204.87	22	cell adhesion;cell organization and biogenesis;developmental processes;other biological processes	plasma membrane;other membranes;other cell component	other molecular function	Pf08205, Pf13927	11658	ENSMUSG00000022636	Alcam	mmu:11658; O70136; Q61490; Q8CDA5; Q8R2T0			0	0	5.631	1
15	High	Master Protein	Q9WV18	Gamma-aminobutyric acid type B receptor subunit 1 [OS=Mus musculus]	0	16.735	5	4	6	4	960	108.1	8.21	8.2	4	cell-cell signaling;signal transduction;other biological processes	non-structural extracellular;plasma membrane;other membranes;mitochondrion;ER/Golgi;other cell component	other molecular function	Pf00003, Pf00084, Pf01094	54393	ENSMUSG00000024462	Gabbr1	mmu:54393; Q6PGJ2; Q9WU48; Q9WV15; Q9WV16; Q9WV17; Q9WV18	G alpha (i) signalling events; Activation of G protein gated Potassium channels; Inhibition of voltage gated Ca2+ channels via Gbeta/gamma subunits; Class C/3 (Metabotropic glutamate/pheromone receptors); GABA B receptor activation	GPCRs, non-odorant ; GPCRs, class A rhodopsin-like; GPCRs, class C metabotropic glutamate, pheromone; GPCRs, other	9	0	5.411	1
16	High	Master Protein	Q9QZF2	Glypican-1 [OS=Mus musculus]	0	54.48	25	10	25	10	557	61.3	7.05	57.99	10	cell organization and biogenesis;protein metabolism;other metabolic processes;developmental processes;other biological processes	non-structural extracellular;extracellular matrix;plasma membrane;other membranes;cytosol;ER/Golgi;nucleus;other cytoplasmic organelle;other cell component	other molecular function	Pf01153	14733	ENSMUSG00000034220	Gpc1	mmu:14733; Q9QZF2	A tetrasaccharide linker sequence is required for GAG synthesis; Cell surface interactions at the vascular wall; Retinoid metabolism and transport; HS-GAG biosynthesis; HS-GAG degradation; Signaling by ROBO receptors		6	0	5.406	1
17	High	Master Protein	Q6NXK7	Inactive dipeptidyl peptidase 10 [OS=Mus musculus]	0	47.434	17	13	29	11	797	90.8	6.48	45.48	13	protein metabolism;other biological processes	plasma membrane;other membranes	other molecular function	Pf00326, Pf00930	269109		Dpp10	mmu:269109; Q6NXK7; Q6P554; Q8K1H0			0	0	5.361	1
18	High	Master Protein	Q9Z1L5	Voltage-dependent calcium channel subunit alpha-2/delta-3 [OS=Mus musculus]	0	69.546	21	16	31	16	1091	122.7	5.73	75.72	16	transport;other biological processes	plasma membrane;other membranes	transporter activity;other molecular function	Pf08399, Pf08473, Pf13768	12294	ENSMUSG00000021991	Cacna2d3	mmu:12294; Q9Z1L5	Presynaptic depolarization and calcium channel opening		1	0	5.317	1
19	High	Master Protein	O08532	Voltage-dependent calcium channel subunit alpha-2/delta-1 [OS=Mus musculus]	0	30.6	7	6	15	6	1103	124.6	5.3	29.28	6	cell-cell signaling;transport;other biological processes	plasma membrane;other membranes;cytosol;ER/Golgi;other cell component	transporter activity;other molecular function	Pf08399, Pf08473, Pf13768	12293	ENSMUSG00000040118	Cacna2d1	mmu:12293; O08532; O08533; O08534; O08535; O08536			0	0	5.248	1
20	High	Master Protein	P97772	Metabotropic glutamate receptor 1 [OS=Mus musculus]	0	13.598	3	4	6	4	1199	133.1	6.86	4.42	4	cell-cell signaling;transport;signal transduction;other biological processes	plasma membrane;other membranes;nucleus;other cell component	other molecular function	Pf00003, Pf01094, Pf07562, Pf10606	14816	ENSMUSG00000019828	Grm1	mmu:14816; P97772; Q6AXG4; Q9EPV6	G alpha (q) signalling events; Neurexins and neuroligins; Class C/3 (Metabotropic glutamate/pheromone receptors)	GPCRs, non-odorant ; Serotonin and anxiety; GPCRs, class C metabotropic glutamate, pheromone; GPCRs, other	7	0	5.023	1
21	High	Master Protein	Q9Z218	Dipeptidyl aminopeptidase-like protein 6 [OS=Mus musculus]	0	106.81	29	19	63	17	804	91.2	6.68	142.95	19	protein metabolism;transport;other biological processes	plasma membrane;other membranes;other cell component	other molecular function	Pf00326, Pf00930	13483	ENSMUSG00000061576	Dpp6	mmu:13483; Q9QWW2; Q9Z218; Q9Z219			0	2	4.921	1
22	High	Master Protein	Q80UG2	Plexin-A4 [OS=Mus musculus]	0	132.962	18	27	58	17	1893	212.4	6.83	116.53	27	cell organization and biogenesis;developmental processes;signal transduction;other biological processes	plasma membrane;other membranes;other cell component	other molecular function	Pf01403, Pf01437, Pf01833, Pf08337, Pf17960, Pf18020, Pf20170	243743	ENSMUSG00000029765	Plxna4	E9QN64; mmu:243743; Q5DTW8; Q80UG2; Q8BKK9	CRMPs in Sema3A signaling; Sema3A PAK dependent Axon repulsion; SEMA3A-Plexin repulsion signaling by inhibiting Integrin adhesion		3	6	4.918	1
23	High	Master Protein	P23818	Glutamate receptor 1 [OS=Mus musculus]	0	69.842	19	14	34	10	907	101.5	7.69	55.34	14	cell-cell signaling;cell organization and biogenesis;transport;developmental processes;signal transduction;other biological processes	non-structural extracellular;plasma membrane;other membranes;cytosol;ER/Golgi;other cytoplasmic organelle;other cell component	signal transduction activity or receptor binding;transporter activity;cytoskeletal activity;other molecular function	Pf00060, Pf01094, Pf10613	14799	ENSMUSG00000020524	Gria1	mmu:14799; P23818	Synaptic adhesion-like molecules; COPII-mediated vesicle transport; Cargo concentration in the ER; Trafficking of GluR2-containing AMPA receptors; Unblocking of NMDA receptors, glutamate binding and activation; Activation of AMPA receptors		7	1	4.886	1
24	High	Master Protein	Q810U4	Neuronal cell adhesion molecule [OS=Mus musculus]	0	151.271	22	20	84	20	1256	138.4	5.91	218.62	20	cell adhesion;cell organization and biogenesis;developmental processes;other biological processes	non-structural extracellular;plasma membrane;other membranes;other cell component	cytoskeletal activity;other molecular function	Pf00041, Pf07679, Pf13882, Pf13927	319504	ENSMUSG00000020598	Nrcam	mmu:319504; Q80U33; Q810U4; Q8BLG8; Q8BX92; Q8BYJ8			0	0	4.86	1
25	High	Master Protein	Q80Z24	Neuronal growth regulator 1 [OS=Mus musculus]	0	45.805	23	5	18	5	348	37.9	6.52	37.86	5	cell adhesion;cell organization and biogenesis;developmental processes;other biological processes	plasma membrane;other membranes;other cell component		Pf07679, Pf13927	320840	ENSMUSG00000040037	Negr1	mmu:320840; Q3UHQ8; Q80T70; Q80Z24	Post-translational modification: synthesis of GPI-anchored proteins		1	0	4.843	1
26	High	Master Protein	P0C192	Leucine-rich repeat-containing protein 4B [OS=Mus musculus]	0	14.099	7	5	10	4	709	76.1	7.24	12.78	5	cell adhesion;cell organization and biogenesis;other biological processes	plasma membrane;other membranes;other cell component	signal transduction activity or receptor binding	Pf07679, Pf13855	272381	ENSMUSG00000047085	Lrrc4b	mmu:272381; P0C192	Receptor-type tyrosine-protein phosphatases		1	1	4.819	1
27	High	Master Protein	Q03137	Ephrin type-A receptor 4 [OS=Mus musculus]	0	42.055	11	9	20	8	986	109.7	6.51	31.91	9	cell adhesion;cell organization and biogenesis;protein metabolism;other metabolic processes;developmental processes;signal transduction;other biological processes	plasma membrane;other membranes;mitochondrion;ER/Golgi;other cytoplasmic organelle;other cell component	signal transduction activity or receptor binding;kinase activity;other molecular function	Pf00041, Pf01404, Pf07647, Pf07699, Pf07714, Pf14575	13838	ENSMUSG00000026235	Epha4	mmu:13838; Q03137; Q80VZ2	EPHA-mediated growth cone collapse; EPH-ephrin mediated repulsion of cells	Spinal cord injury; Gene regulatory network modelling somitogenesis	5	1	4.803	1
28	High	Master Protein	O35136	Neural cell adhesion molecule 2 [OS=Mus musculus]	0	83.912	29	19	46	19	837	93.1	6.07	87.21	19	cell adhesion;cell organization and biogenesis;developmental processes;other biological processes	plasma membrane;other membranes;nucleus;other cell component	other molecular function	Pf00041, Pf07679, Pf13927	17968	ENSMUSG00000022762	Ncam2	mmu:17968; O35136; O35962; Q0VF23			0	0	4.748	1
29	High	Master Protein	P35438	Glutamate receptor ionotropic, NMDA 1 [OS=Mus musculus]	0	14.04	5	5	12	5	938	105.4	8.84	8.19	5	cell-cell signaling;cell organization and biogenesis;RNA metabolism OR transcription;other metabolic processes;transport;developmental processes;signal transduction;other biological processes	non-structural extracellular;plasma membrane;other membranes;ER/Golgi;other cell component	signal transduction activity or receptor binding;transporter activity;other molecular function	Pf00060, Pf01094, Pf10562, Pf10613	14810	ENSMUSG00000026959	Grin1	A2AI15; A2AI18; mmu:14810; P35438; Q8CFS4	RAF/MAP kinase cascade; Synaptic adhesion-like molecules; Assembly and cell surface presentation of NMDA receptors; EPHB-mediated forward signaling; Unblocking of NMDA receptors, glutamate binding and activation	Splicing factor NOVA regulated synaptic proteins; Alzheimer's disease; Spinal cord injury	8	0	4.716	1
30	High	Master Protein	Q9QYS2	Metabotropic glutamate receptor 3 [OS=Mus musculus]	0	147.59	34	27	86	25	879	99.1	7.75	153.87	27	cell-cell signaling;other metabolic processes;signal transduction;other biological processes	plasma membrane;other membranes;other cell component	other molecular function	Pf00003, Pf01094, Pf07562	108069	ENSMUSG00000003974	Grm3	mmu:108069; Q14DJ9; Q9QYS2	G alpha (i) signalling events; Class C/3 (Metabotropic glutamate/pheromone receptors)	GPCRs, non-odorant ; GPCRs, class C metabotropic glutamate, pheromone	4	3	4.688	1
31	High	Master Protein	P13595	Neural cell adhesion molecule 1 [OS=Mus musculus]	0	238.197	40	31	159	31	1115	119.4	4.83	327.39	31	cell adhesion;cell organization and biogenesis;stress response;developmental processes;signal transduction;other biological processes	plasma membrane;other membranes;cytosol;other cell component	other molecular function	Pf00041, Pf07679, Pf13927	17967		Ncam1	mmu:17967; P13594; P13595; Q61949; Q61950; Q6LBU8; Q8BQ96; Q8C4B2; Q921P2; Q9R2A7	RAF/MAP kinase cascade; NCAM1 interactions; Signal transduction by L1		4	0	4.676	1
32	High	Master Protein	Q63912	Oligodendrocyte-myelin glycoprotein [OS=Mus musculus]	0	38.623	15	8	22	8	440	49.3	8.41	51.01	8	cell adhesion;cell organization and biogenesis;stress response;developmental processes	plasma membrane;other membranes;other cell component	other molecular function	Pf00560, Pf01462, Pf13855	18377		Omg	mmu:18377; Q63912	Axonal growth inhibition (RHOA activation)		1	0	4.602	1
33	High	Master Protein	Q02105	Complement C1q subcomponent subunit C [OS=Mus musculus]	0	22.708	20	4	11	4	246	26	8.54	22.46	4	cell organization and biogenesis;stress response;other biological processes	non-structural extracellular;other cell component		Pf00386, Pf01391	12262	ENSMUSG00000036896	C1qc	mmu:12262; Q02105; Q6DI63	Initial triggering of complement; Classical antibody-mediated complement activation; Regulation of Complement cascade	Oxidative damage response; Complement activation, classical pathway; Tyrobp causal network in microglia; Microglia pathogen phagocytosis pathway	7	0	4.563	1
34	High	Master Protein	Q99N28	Cell adhesion molecule 3 [OS=Mus musculus]	0	68.277	38	9	23	9	396	42.9	5.8	66.58	9	cell adhesion;other biological processes	plasma membrane;other membranes;other cell component	other molecular function	Pf07679, Pf08205, Pf13927	94332	ENSMUSG00000005338	Cadm3	mmu:94332; Q8BSQ8; Q8K1H8; Q99N28	Nectin/Necl trans heterodimerization	Splicing factor NOVA regulated synaptic proteins	3	0	4.56	1
35	High	Master Protein	O09126	Semaphorin-4D [OS=Mus musculus]	0	19.953	5	4	14	4	861	95.6	7.81	23.82	4	cell adhesion;cell organization and biogenesis;developmental processes;signal transduction;other biological processes	non-structural extracellular;plasma membrane;other membranes	signal transduction activity or receptor binding;other molecular function	Pf00047, Pf01403, Pf01437	20354	ENSMUSG00000021451	Sema4d	mmu:20354; O09126; Q6GTM9	Sema4D mediated inhibition of cell attachment and migration; Sema4D induced cell migration and growth-cone collapse; Other semaphorin interactions		3	0	4.518	1
36	High	Master Protein	Q920P3	BMP/retinoic acid-inducible neural-specific protein 1 [OS=Mus musculus]	0	54.383	16	11	35	11	760	88.6	8.97	70.68	11	cell cycle OR cell proliferation;stress response;developmental processes;other biological processes	other cell component		Pf01823, Pf19052	56710	ENSMUSG00000028351	Brinp1	mmu:56710; Q80ZL2; Q812F0; Q8C1C9; Q920P3; Q920P4; Q9QXL0			0	0	4.516	1
37	High	Master Protein	Q80YX1	Tenascin [OS=Mus musculus]	0	23.635	3	7	14	7	2110	231.7	4.89	14.97	7	cell adhesion;cell-cell signaling;cell organization and biogenesis;stress response;developmental processes;other biological processes	non-structural extracellular;extracellular matrix	other molecular function	Pf00041, Pf00147, Pf07974, Pf18720	21923	ENSMUSG00000028364	Tnc	mmu:21923; Q64706; Q80YX1; Q80YX2	Regulation of Insulin-like Growth Factor (IGF) transport and uptake by Insulin-like Growth Factor Binding Proteins (IGFBPs); Post-translational protein phosphorylation; ECM proteoglycans; Integrin cell surface interactions	Focal adhesion: PI3K-Akt-mTOR signaling pathway; Focal adhesion	6	0	4.514	1
38	High	Master Protein	O88569	Heterogeneous nuclear ribonucleoproteins A2/B1 [OS=Mus musculus]	0	302.429	71	32	278	28	353	37.4	8.95	772.75	32	cell organization and biogenesis;DNA metabolism;RNA metabolism OR transcription;other metabolic processes;transport;other biological processes	non-structural extracellular;cytosol;nucleus;other cell component	nucleic acid binding activity;other molecular function	Pf00076, Pf11627	53379	ENSMUSG00000004980	Hnrnpa2b1	B9EJ02; mmu:53379; O88569; Q3UVJ5; Q6PCV9; Q8C2A0; Q8CJ71; Q91ZR9; Q9R204	mRNA Splicing - Major Pathway; Processing of Capped Intron-Containing Pre-mRNA	mRNA processing	3	4	4.48	1
39	High	Master Protein	Q06890	Clusterin [OS=Mus musculus]	0	73.278	30	14	45	14	448	51.6	5.67	90.65	14	cell cycle OR cell proliferation;cell organization and biogenesis;protein metabolism;other metabolic processes;stress response;transport;developmental processes;signal transduction;other biological processes	non-structural extracellular;other membranes;cytosol;cytoskeleton;mitochondrion;ER/Golgi;nucleus;other cell component	signal transduction activity or receptor binding;cytoskeletal activity;other molecular function	Pf01093	12759	ENSMUSG00000022037	Clu	mmu:12759; Q06890	Regulation of Complement cascade; Platelet degranulation ; Antimicrobial peptides; Terminal pathway of complement		4	0	4.422	1
40	High	Master Protein	Q8BGN3	Glycerophosphocholine cholinephosphodiesterase ENPP6 [OS=Mus musculus]	0	78.505	35	13	36	13	440	50.6	7.31	78.31	13	other metabolic processes	non-structural extracellular;plasma membrane;other membranes	other molecular function	Pf01663	320981	ENSMUSG00000038173	Enpp6	mmu:320981; Q4VAH5; Q8BGN3	Glycerophospholipid catabolism		1	0	4.419	1
41	High	Master Protein	O55026	Ectonucleoside triphosphate diphosphohydrolase 2 [OS=Mus musculus]	0	27.805	12	5	12	5	495	54.3	8.37	30.42	5	other metabolic processes;stress response;signal transduction;other biological processes	extracellular matrix;plasma membrane;other membranes;other cell component	other molecular function	Pf01150	12496	ENSMUSG00000015085	Entpd2	mmu:12496; O35928; O55026; Q9DCR9	Phosphate bond hydrolysis by NTPDase proteins	Purine metabolism	2	0	4.412	1
42	High	Master Protein	Q3UHK6	Teneurin-4 [OS=Mus musculus]	0	30.939	4	10	15	7	2771	308.2	6.57	16.87	10	cell adhesion;cell cycle OR cell proliferation;cell organization and biogenesis;developmental processes;signal transduction;other biological processes	plasma membrane;other membranes;nucleus;other cell component	other molecular function	Pf05593, Pf06484, Pf07974, Pf15636	23966	ENSMUSG00000048078	Tenm4	mmu:23966; O70465; Q3TSI0; Q3UH52; Q3UHK6; Q80TF5; Q9WTS7			0	1	4.366	1
43	High	Master Protein	P97300	Neuroplastin [OS=Mus musculus]	0	69.185	24	9	70	9	397	44.3	7.74	114.18	9	cell adhesion;cell-cell signaling;cell organization and biogenesis;developmental processes;other biological processes	plasma membrane;other membranes;other cell component	signal transduction activity or receptor binding;other molecular function	Pf13927	20320	ENSMUSG00000032336	Nptn	mmu:20320; P97300; Q3U519; Q8C637; Q8C6H8			0	0	4.362	1
44	High	Master Protein	Q8BLK3	Limbic system-associated membrane protein [OS=Mus musculus]	0	60.51	34	12	64	12	341	38.1	6.65	128.28	12	cell adhesion;other biological processes	plasma membrane;other membranes;cytosol		Pf07679, Pf13927		ENSMUSG00000061080	Lsamp	Q8BLK3	Post-translational modification: synthesis of GPI-anchored proteins		1	0	4.265	1
45	High	Master Protein	Q8BFW6	Ectonucleoside triphosphate diphosphohydrolase 3 [OS=Mus musculus]	0	9.816	7	4	7	4	529	58.9	6.15	0	4	other metabolic processes	plasma membrane;other membranes	other molecular function	Pf01150	215446	ENSMUSG00000041608	Entpd3	E9PYV0; mmu:215446; Q3TC04; Q3TDX3; Q8BFW6	Phosphate bond hydrolysis by NTPDase proteins	Purine metabolism	2	0	4.242	1
46	High	Master Protein	Q9JIA1	Leucine-rich glioma-inactivated protein 1 [OS=Mus musculus]	0	73.997	33	18	53	18	557	63.6	8.02	117.17	18	cell organization and biogenesis;developmental processes;other biological processes	non-structural extracellular;ER/Golgi;other cell component	signal transduction activity or receptor binding	Pf03736, Pf13855	56839	ENSMUSG00000067242	Lgi1	A0A0G2JFT0; mmu:56839; Q9JIA1	LGI-ADAM interactions		1	0	4.233	1
47	High	Master Protein	Q3UVX5	Metabotropic glutamate receptor 5 [OS=Mus musculus]	0	85.291	17	19	43	19	1203	131.8	7.84	72.13	19	cell-cell signaling;cell organization and biogenesis;protein metabolism;other metabolic processes;signal transduction;other biological processes	plasma membrane;other membranes;other cell component	signal transduction activity or receptor binding;other molecular function	Pf00003, Pf01094, Pf07562, Pf10606	108071	ENSMUSG00000049583	Grm5	mmu:108071; Q3UVX5	G alpha (q) signalling events; Neurexins and neuroligins; Class C/3 (Metabotropic glutamate/pheromone receptors)	GPCRs, non-odorant ; GPCRs, class C metabotropic glutamate, pheromone	5	0	4.158	1
48	High	Master Protein	Q9QUR8	Semaphorin-7A [OS=Mus musculus]	0	92.609	32	18	40	18	664	74.9	7.74	82.67	18	cell organization and biogenesis;protein metabolism;other metabolic processes;stress response;developmental processes;signal transduction;other biological processes	plasma membrane;other membranes	signal transduction activity or receptor binding	Pf01403, Pf01437	20361	ENSMUSG00000038264	Sema7a	mmu:20361; O88371; Q9QUR8	Other semaphorin interactions		1	0	4.133	1
49	High	Master Protein	Q9EPL2	Calsyntenin-1 [OS=Mus musculus]	0	12.824	4	4	8	4	979	108.8	4.92	8.22	4	cell adhesion;cell-cell signaling;transport;other biological processes	non-structural extracellular;plasma membrane;other membranes;ER/Golgi;nucleus;other cytoplasmic organelle;other cell component	cytoskeletal activity;other molecular function	Pf00028, Pf13385, Pf19699	65945	ENSMUSG00000039953	Clstn1	A2A800; B2KFP1; B2KFP2; mmu:65945; Q69ZV9; Q7TS67; Q8K103; Q9EPL2		Splicing factor NOVA regulated synaptic proteins	1	0	4.115	1
50	High	Master Protein	O88998	Noelin [OS=Mus musculus]	0	50.706	22	10	32	10	485	55.4	6.95	57.37	10	cell organization and biogenesis;developmental processes;signal transduction;other biological processes	non-structural extracellular;plasma membrane;other membranes;ER/Golgi;other cell component		Pf02191, Pf12308	56177	ENSMUSG00000026833	Olfm1	A3KGE5; mmu:56177; O35429; O88998; O88999; Q91XK8; Q9QWQ9; Q9QWR0			0	0	4.097	1
51	High	Master Protein	P51863	V-type proton ATPase subunit d 1 [OS=Mus musculus]	0	15.389	13	4	5	4	351	40.3	5	8.54	4	cell organization and biogenesis;transport;developmental processes;other biological processes	plasma membrane;other membranes;cytoskeleton;ER/Golgi;other cytoplasmic organelle;other cell component	transporter activity;other molecular function	Pf01992	11972	ENSMUSG00000013160	Atp6v0d1	mmu:11972; P51863; Q54A57; Q9QWJ2	Insulin receptor recycling; Amino acids regulate mTORC1; ROS and RNS production in phagocytes; Transferrin endocytosis and recycling; Ion channel transport		5	0	4.076	1
52	High	Master Protein	Q69ZK9	Neuroligin-2 [OS=Mus musculus]	0	24.618	11	6	7	5	836	90.9	6.18	8.94	6	cell adhesion;cell-cell signaling;cell organization and biogenesis;protein metabolism;other metabolic processes;transport;developmental processes;other biological processes	plasma membrane;other membranes;other cell component	signal transduction activity or receptor binding;other molecular function	Pf00135	216856	ENSMUSG00000051790	Nlgn2	mmu:216856; Q5F288; Q69ZK9	Neurexins and neuroligins		1	1	4.061	1
53	High	Master Protein	Q80TR1	Adhesion G protein-coupled receptor L1 [OS=Mus musculus]	0	80.424	16	14	28	14	1466	161.6	6.48	72.22	14	cell adhesion;signal transduction;other biological processes	plasma membrane;other membranes;other cell component	other molecular function	Pf00002, Pf01825, Pf02140, Pf02191, Pf02354, Pf02793, Pf16489	330814	ENSMUSG00000013033	Adgrl1	mmu:330814; Q3UH90; Q7TNE5; Q80T49; Q80TR1		GPCRs, non-odorant ; GPCRs, class B secretin-like	2	0	4.046	1
54	High	Master Protein	P97798	Neogenin [OS=Mus musculus]	0	37.892	8	9	19	9	1492	162.8	6.49	41.86	9	cell adhesion;cell organization and biogenesis;transport;developmental processes;other biological processes	plasma membrane;other membranes;ER/Golgi;nucleus;other cell component	signal transduction activity or receptor binding;other molecular function	Pf00041, Pf06583, Pf07679, Pf13895	18007	ENSMUSG00000032340	Neo1	P97798		Splicing factor NOVA regulated synaptic proteins	1	0	4.038	1
55	High	Master Protein	Q9R1V7	Disintegrin and metalloproteinase domain-containing protein 23 [OS=Mus musculus]	0	66.369	16	12	41	12	829	91.5	7.68	105.2	12	cell adhesion;protein metabolism;other biological processes	non-structural extracellular;plasma membrane;other membranes;other cell component	other molecular function	Pf00200, Pf01421, Pf01562, Pf08516	23792	ENSMUSG00000025964	Adam23	mmu:23792; Q6QDY9; Q6QDZ0; Q8CC33; Q9R1V7	LGI-ADAM interactions		1	0	4.031	1
56	High	Master Protein	Q6Q477	Plasma membrane calcium-transporting ATPase 4 [OS=Mus musculus]	0	111.73	13	13	52	5	1205	133	6.13	133.36	13	stress response;transport;developmental processes;other biological processes	plasma membrane;other membranes;cytoskeleton;other cell component	transporter activity;enzyme regulator activity;other molecular function	Pf00122, Pf00689, Pf00690, Pf00702, Pf12424, Pf13246	381290	ENSMUSG00000026463	Atp2b4	mmu:381290; Q32ME1; Q6Q477	Ion homeostasis; Ion transport by P-type ATPases; Reduction of cytosolic Ca++ levels		3	0	4.027	1
57	High	Master Protein	Q61330	Contactin-2 [OS=Mus musculus]	0	63.151	16	13	34	13	1040	113.1	7.62	68.95	13	cell adhesion;cell organization and biogenesis;protein metabolism;other metabolic processes;transport;developmental processes;signal transduction;other biological processes	plasma membrane;other membranes;other cell component	other molecular function	Pf00041, Pf07679, Pf13927	21367	ENSMUSG00000053024	Cntn2	mmu:21367; Q61330; Q6NZJ4; Q7TSJ5			0	0	4.025	1
58	High	Master Protein	P21836	Acetylcholinesterase [OS=Mus musculus]	0	42.137	18	8	19	8	614	68.1	6.33	35.12	8	cell adhesion;cell-cell signaling;cell organization and biogenesis;other metabolic processes;transport;developmental processes;signal transduction;other biological processes	non-structural extracellular;extracellular matrix;plasma membrane;other membranes;ER/Golgi;nucleus;other cell component	other molecular function	Pf00135, Pf08674	11423	ENSMUSG00000023328	Ache	mmu:11423; P21836		Acetylcholine synthesis; Biogenic amine synthesis	2	0	4.021	1
59	High	Master Protein	Q6P9K9	Neurexin-3 [OS=Mus musculus]	0	154.893	22	28	87	15	1571	173.3	6.14	186.79	28	cell adhesion;cell-cell signaling;cell organization and biogenesis;transport;developmental processes;other biological processes	plasma membrane;other membranes;other cell component	other molecular function	Pf00008, Pf02210	18191	ENSMUSG00000066392	Nrxn3	E9PW93; E9Q466; mmu:18191; Q6P9K9; Q8CCT8	Neurexins and neuroligins		1	9	4.014	1
60	High	Master Protein	Q80T41	Gamma-aminobutyric acid type B receptor subunit 2 [OS=Mus musculus]	0	23.799	7	6	14	6	940	105.6	8.72	13.02	6	cell-cell signaling;signal transduction	plasma membrane;other membranes;other cell component	other molecular function	Pf00003, Pf01094, Pf18455	242425	ENSMUSG00000039809	Gabbr2	A2AL05; mmu:242425; Q80T41	G alpha (i) signalling events; Activation of G protein gated Potassium channels; Inhibition of voltage gated Ca2+ channels via Gbeta/gamma subunits; Class C/3 (Metabotropic glutamate/pheromone receptors); GABA B receptor activation	GPCRs, non-odorant ; Splicing factor NOVA regulated synaptic proteins; GPCRs, class C metabotropic glutamate, pheromone	8	0	3.995	1
61	High	Master Protein	Q69Z26	Contactin-4 [OS=Mus musculus]	0	18.642	5	5	10	4	1026	113.4	7.36	16.59	5	cell adhesion;cell organization and biogenesis;developmental processes;other biological processes	non-structural extracellular;plasma membrane;other membranes		Pf00041, Pf07679, Pf13927	269784	ENSMUSG00000064293	Cntn4	mmu:269784; Q14BL8; Q69Z26; Q8BRT6; Q8CBD3			0	1	3.968	1
62	High	Master Protein	Q810U3	Neurofascin [OS=Mus musculus]	0	160.881	27	30	105	30	1240	137.9	6.19	250.24	30	cell adhesion;cell organization and biogenesis;developmental processes;other biological processes	plasma membrane;other membranes;other cell component	other molecular function	Pf00041, Pf00047, Pf07679, Pf13882, Pf13927	269116	ENSMUSG00000026442	Nfasc	mmu:269116; Q810U3	Neutrophil degranulation; Neurofascin interactions		2	0	3.928	1
63	High	Master Protein	B0V2N1	Receptor-type tyrosine-protein phosphatase S [OS=Mus musculus]	0	127.418	18	20	50	16	1907	211.8	7.23	130.78	20	cell adhesion;cell-cell signaling;cell organization and biogenesis;protein metabolism;other metabolic processes;developmental processes;other biological processes	plasma membrane;other membranes;cytosol;ER/Golgi;other cell component	other molecular function	Pf00041, Pf00102, Pf07679	19280	ENSMUSG00000013236	Ptprs	B0V2N1; mmu:19280; Q3TEC3; Q3TXC9; Q4JFC7; Q5XJV4; Q64503; Q64699; Q7TT17	Receptor-type tyrosine-protein phosphatases; Synaptic adhesion-like molecules	Mechanisms associated with pluripotency	3	0	3.848	1
64	High	Master Protein	P06837	Neuromodulin [OS=Mus musculus]	0	23.119	37	5	11	5	227	23.6	4.73	13.59	5	cell organization and biogenesis;stress response;developmental processes;other biological processes	plasma membrane;other membranes;other cell component	other molecular function	Pf00612, Pf06614, Pf10580	14432	ENSMUSG00000047261	Gap43	mmu:14432; P06837	L1CAM interactions	Spinal cord injury; Comprehensive IL-17A signaling	3	0	3.845	1
65	High	Master Protein	P70206	Plexin-A1 [OS=Mus musculus]	0	65.081	10	16	26	10	1894	211	6.9	35.87	16	cell organization and biogenesis;developmental processes;signal transduction;other biological processes	plasma membrane;other membranes;cytosol;nucleus;other cell component	other molecular function	Pf01403, Pf01437, Pf01833, Pf08337, Pf17960, Pf18020, Pf20170	18844	ENSMUSG00000030084	Plxna1	B2RQP7; mmu:18844; P70206; Q5DTR0	RND1 GTPase cycle; CRMPs in Sema3A signaling; RHOD GTPase cycle; Sema3A PAK dependent Axon repulsion; SEMA3A-Plexin repulsion signaling by inhibiting Integrin adhesion; Other semaphorin interactions		6	0	3.827	1
66	High	Master Protein	Q8BYM5	Neuroligin-3 [OS=Mus musculus]	0	38.19	16	9	19	9	825	91.1	5.8	40.98	9	cell adhesion;cell-cell signaling;cell organization and biogenesis;transport;developmental processes;signal transduction;other biological processes	plasma membrane;other membranes;other cell component	signal transduction activity or receptor binding;other molecular function	Pf00135	245537	ENSMUSG00000031302	Nlgn3	A2AGI1; mmu:245537; Q8BXR4; Q8BYM5	Neurexins and neuroligins		1	0	3.826	1
67	High	Master Protein	A2ASQ1	Agrin [OS=Mus musculus]	0	39.539	5	9	11	9	1950	207.4	6.32	23.05	9	cell-cell signaling;cell organization and biogenesis;other metabolic processes;transport;developmental processes;other biological processes	non-structural extracellular;extracellular matrix;plasma membrane;other membranes;ER/Golgi;other cell component	other molecular function	Pf00008, Pf00050, Pf00053, Pf00054, Pf01390, Pf07648		ENSMUSG00000041936	Agrn	A2ASP9; A2ASQ0; A2ASQ1; B2RWU1	ECM proteoglycans; Retinoid metabolism and transport; A tetrasaccharide linker sequence is required for GAG synthesis; HS-GAG biosynthesis; HS-GAG degradation	Primary focal segmental glomerulosclerosis (FSGS)	6	0	3.816	1
68	High	Master Protein	Q9ESM3	Hyaluronan and proteoglycan link protein 2 [OS=Mus musculus]	0	23.83	20	7	11	7	341	37.9	9.09	20.78	7	cell adhesion;cell organization and biogenesis;developmental processes;other biological processes	non-structural extracellular;extracellular matrix;other cell component	other molecular function	Pf00193, Pf07686	73940	ENSMUSG00000004894	Hapln2	mmu:73940; Q9ESM3			0	0	3.815	1
69	High	Master Protein	Q9Z2W9	Glutamate receptor 3 [OS=Mus musculus]	0	51.669	16	11	18	8	888	100.5	8.38	27.31	11	cell-cell signaling;transport;signal transduction;other biological processes	non-structural extracellular;plasma membrane;other membranes;other cell component	transporter activity;other molecular function	Pf00060, Pf01094, Pf10613	53623	ENSMUSG00000001986	Gria3	A2VDF4; mmu:53623; Q5DTJ0; Q9Z2W9	Synaptic adhesion-like molecules; Trafficking of GluR2-containing AMPA receptors; Unblocking of NMDA receptors, glutamate binding and activation; Activation of AMPA receptors		5	1	3.803	1
70	High	Master Protein	P43006	Excitatory amino acid transporter 2 [OS=Mus musculus]	0	174.933	27	17	165	17	572	62	6.68	419.99	17	cell organization and biogenesis;other metabolic processes;stress response;transport;developmental processes;other biological processes	plasma membrane;other membranes;other cell component	transporter activity;other molecular function	Pf00375	20511	ENSMUSG00000005089	Slc1a2	mmu:20511; O35877; O54686; O54687; P43006	Glutamate Neurotransmitter Release Cycle; Transport of inorganic cations/anions and amino acids/oligopeptides; Astrocytic Glutamate-Glutamine Uptake And Metabolism	Oxidative stress and redox pathway	4	0	3.789	1
71	High	Master Protein	Q7TPD3	Roundabout homolog 2 [OS=Mus musculus]	0	32.169	6	8	15	6	1470	161.1	6.33	23.53	8	cell adhesion;cell organization and biogenesis;developmental processes;other biological processes	plasma membrane;other membranes;other cell component	other molecular function	Pf00041, Pf07679, Pf13927			Robo2	Q7TPD3; Q8BJ59			0	3	3.768	1
72	High	Master Protein	Q69ZU6	Thrombospondin type-1 domain-containing protein 7A [OS=Mus musculus]	0	31.858	6	8	10	8	1645	183.4	7.2	16.2	8	developmental processes;other biological processes	non-structural extracellular;plasma membrane;other membranes;other cell component		Pf00090, Pf19028, Pf19030	330267		Thsd7a	mmu:330267; Q3TP01; Q3UWV1; Q69ZU6	O-glycosylation of TSR domain-containing proteins		1	0	3.719	1
73	High	Master Protein	Q6PFE7	Tomoregulin-1 [OS=Mus musculus]	0	17.742	10	4	10	4	372	40.1	6.81	18.74	4		plasma membrane;other membranes		Pf07648	230157	ENSMUSG00000028347	Tmeff1	A2AJN3; mmu:230157; Q6PFE7; Q8BRP7; Q8C536; Q9JJS1			0	0	3.714	1
74	High	Master Protein	Q8BVE3	V-type proton ATPase subunit H [OS=Mus musculus]	0	19.543	13	6	15	6	483	55.8	6.61	3.9	6	cell organization and biogenesis;transport	other membranes;ER/Golgi;other cytoplasmic organelle;other cell component	transporter activity	Pf03224, Pf11698	108664	ENSMUSG00000033793	Atp6v1h	mmu:108664; Q8BVE3; Q921X8	Insulin receptor recycling; Amino acids regulate mTORC1; ROS and RNS production in phagocytes; Transferrin endocytosis and recycling; Ion channel transport		5	0	3.687	1
75	High	Master Protein	Q64487	Receptor-type tyrosine-protein phosphatase delta [OS=Mus musculus]	0	117.681	19	27	61	22	1912	214.3	6.55	127.09	27	cell adhesion;cell-cell signaling;cell organization and biogenesis;protein metabolism;other metabolic processes;developmental processes;other biological processes	plasma membrane;other membranes;other cell component	signal transduction activity or receptor binding;other molecular function	Pf00041, Pf00102, Pf07679, Pf13927	19266	ENSMUSG00000028399	Ptprd	G3X9S7; mmu:19266; Q64486; Q64487; Q64488; Q64495; Q8VBV0	Synaptic adhesion-like molecules; Receptor-type tyrosine-protein phosphatases		2	4	3.657	1
76	High	Master Protein	Q9CPW0	Contactin-associated protein-like 2 [OS=Mus musculus]	0	175.749	31	30	92	30	1332	148.1	6.77	207.27	30	cell adhesion;cell-cell signaling;cell cycle OR cell proliferation;cell organization and biogenesis;other metabolic processes;stress response;developmental processes;signal transduction;other biological processes	plasma membrane;other membranes;ER/Golgi;other cytoplasmic organelle;other cell component	other molecular function	Pf00754, Pf02210	66797	ENSMUSG00000039419	Cntnap2	mmu:66797; Q6P2K4; Q6ZQ31; Q9CPW0			0	0	3.617	1
77	High	Master Protein	Q99PJ0	Neurotrimin [OS=Mus musculus]	0	99.787	37	13	106	13	344	38	7.81	260.02	13	cell adhesion;other biological processes	non-structural extracellular;plasma membrane;other membranes;other cell component		Pf07679, Pf13927		ENSMUSG00000059974	Ntm	Q99PJ0	Post-translational modification: synthesis of GPI-anchored proteins		1	0	3.606	1
78	High	Master Protein	Q68ED2	Metabotropic glutamate receptor 7 [OS=Mus musculus]	0	12.905	6	4	6	4	915	102.2	7.88	11.55	4	cell-cell signaling;cell organization and biogenesis;other metabolic processes;stress response;transport;developmental processes;signal transduction;other biological processes	plasma membrane;other membranes;ER/Golgi;other cell component	transporter activity;enzyme regulator activity;other molecular function	Pf00003, Pf01094, Pf07562	108073	ENSMUSG00000056755	Grm7	mmu:108073; Q68ED2	G alpha (i) signalling events; Class C/3 (Metabotropic glutamate/pheromone receptors)	GPCRs, non-odorant ; GPCRs, class C metabotropic glutamate, pheromone	4	0	3.575	1
79	High	Master Protein	Q6P5F6	Zinc transporter ZIP10 [OS=Mus musculus]	0	14.933	5	4	10	4	833	94.3	6.71	13.91	4	transport;other biological processes	plasma membrane;other membranes	transporter activity	Pf02535	227059	ENSMUSG00000025986	Slc39a10	mmu:227059; Q6P5F6; Q80TG2; Q8BX42; Q8C0L2			0	0	3.56	1
80	High	Master Protein	P10649	Glutathione S-transferase Mu 1 [OS=Mus musculus]	0	19.651	29	6	12	5	218	26	7.94	16.43	6	other metabolic processes;stress response;other biological processes	non-structural extracellular;cytosol;other cell component	other molecular function	Pf02798, Pf14497	14862	ENSMUSG00000058135	Gstm1	A2AE90; mmu:14862; P10649; Q58ET5	Glutathione conjugation	Metapathway biotransformation; Aflatoxin B1 metabolism; Estrogen metabolism; Oxidative stress and redox pathway	5	0	3.55	1
81	High	Master Protein	P46096	Synaptotagmin-1 [OS=Mus musculus]	0	65.601	37	14	55	14	421	47.4	8.53	115.85	14	cell-cell signaling;cell organization and biogenesis;transport;developmental processes;other biological processes	plasma membrane;other membranes;ER/Golgi;other cell component	signal transduction activity or receptor binding;other molecular function	Pf00168	20979	ENSMUSG00000035864	Syt1	mmu:20979; P46096	Dopamine Neurotransmitter Release Cycle; Serotonin Neurotransmitter Release Cycle; Norepinephrine Neurotransmitter Release Cycle; Glutamate Neurotransmitter Release Cycle; Acetylcholine Neurotransmitter Release Cycle; GABA synthesis, release, reuptake and degradation; Cargo recognition for clathrin-mediated endocytosis		8	0	3.548	1
82	High	Master Protein	P35802	Neuronal membrane glycoprotein M6-a [OS=Mus musculus]	0	31.679	16	5	21	5	278	31.1	5.27	41.12	5	cell organization and biogenesis;transport;developmental processes;other biological processes	plasma membrane;other membranes;other cell component	transporter activity	Pf01275	234267	ENSMUSG00000031517	Gpm6a	mmu:234267; P35802			0	0	3.514	1
83	High	Master Protein	P55066	Neurocan core protein [OS=Mus musculus]	0	82.096	17	17	45	17	1268	137.1	5.72	69.43	17	cell adhesion;developmental processes;other biological processes	non-structural extracellular;extracellular matrix;plasma membrane;other membranes;other cell component	other molecular function	Pf00008, Pf00059, Pf00084, Pf00193, Pf07686	13004		Ncan	mmu:13004; P55066; Q6P1E3; Q8C4F8	ECM proteoglycans; A tetrasaccharide linker sequence is required for GAG synthesis; Chondroitin sulfate biosynthesis; CS/DS degradation; Dermatan sulfate biosynthesis		5	0	3.507	1
84	High	Master Protein	O88343	Electrogenic sodium bicarbonate cotransporter 1 [OS=Mus musculus]	0	50.241	10	8	14	8	1079	121.4	6.84	20.93	8	transport;other biological processes	plasma membrane;other membranes;other cell component	transporter activity;other molecular function	Pf00955, Pf07565	54403	ENSMUSG00000060961	Slc4a4	mmu:54403; O88343; Q3USE4; Q8BUG0; Q8QZR9; Q9R1C4	Bicarbonate transporters		1	0	3.47	1
85	High	Master Protein	P11627	Neural cell adhesion molecule L1 [OS=Mus musculus]	0	160.656	26	24	87	24	1260	140.9	5.97	222.03	24	cell adhesion;cell organization and biogenesis;developmental processes;signal transduction;other biological processes	plasma membrane;other membranes;other cytoplasmic organelle;other cell component	signal transduction activity or receptor binding;other molecular function	Pf00041, Pf07679, Pf13882, Pf13927			L1cam	P11627	Recycling pathway of L1; Interaction between L1 and Ankyrins; Signal transduction by L1		4	0	3.47	1
86	High	Master Protein	O88935	Synapsin-1 [OS=Mus musculus]	0	105.084	41	19	68	16	706	74.1	9.8	163.58	19	cell-cell signaling;cell organization and biogenesis;transport;developmental processes;other biological processes	other membranes;cytosol;cytoskeleton;ER/Golgi;nucleus;other cell component	cytoskeletal activity;other molecular function	Pf02078, Pf02750, Pf10581	20964	ENSMUSG00000037217	Syn1	mmu:20964; O88935; Q62279; Q8QZT8	Dopamine Neurotransmitter Release Cycle; Serotonin Neurotransmitter Release Cycle		2	2	3.447	1
87	High	Master Protein	E9Q7X7	Neurexin-2 [OS=Mus musculus]	0	53.13	9	14	33	9	1710	184.8	5.9	60.15	14	cell adhesion;cell-cell signaling;cell organization and biogenesis;transport;developmental processes;signal transduction;other biological processes	plasma membrane;other membranes;other cell component	signal transduction activity or receptor binding;other molecular function	Pf02210		ENSMUSG00000033768	Nrxn2	E9Q7X7	Neurexins and neuroligins		1	0	3.44	1
88	High	Master Protein	P62812	Gamma-aminobutyric acid receptor subunit alpha-1 [OS=Mus musculus]	0	18.909	10	6	18	5	455	51.7	9.31	10.47	6	cell-cell signaling;cell organization and biogenesis;transport;developmental processes;signal transduction;other biological processes	plasma membrane;other membranes;other cell component	transporter activity;other molecular function	Pf02931, Pf02932	14394	ENSMUSG00000010803	Gabra1	mmu:14394; P18504; P62812	GABA receptor activation	Serotonin and anxiety	2	2	3.404	1
89	High	Master Protein	P56564	Excitatory amino acid transporter 1 [OS=Mus musculus]	0	127.498	23	9	49	9	543	59.6	8.4	154.79	9	other metabolic processes;stress response;transport;developmental processes;other biological processes	plasma membrane;other membranes;mitochondrion;other cell component	transporter activity;other molecular function	Pf00375	20512	ENSMUSG00000005360	Slc1a3	mmu:20512; P56564; Q99P53	Glutamate Neurotransmitter Release Cycle; Transport of inorganic cations/anions and amino acids/oligopeptides; Astrocytic Glutamate-Glutamine Uptake And Metabolism		3	0	3.381	1
90	High	Master Protein	Q64444	Carbonic anhydrase 4 [OS=Mus musculus]	0	22.579	19	4	6	4	305	34.3	8.21	15.16	4	transport;other biological processes	non-structural extracellular;plasma membrane;other membranes;cytosol;ER/Golgi;other cell component	other molecular function	Pf00194	12351	ENSMUSG00000000805	Ca4	mmu:12351; Q64444	Erythrocytes take up carbon dioxide and release oxygen; Erythrocytes take up oxygen and release carbon dioxide; Reversible hydration of carbon dioxide		3	0	3.362	1
91	High	Master Protein	P56399	Ubiquitin carboxyl-terminal hydrolase 5 [OS=Mus musculus]	0	24.701	13	7	12	7	858	95.8	5.01	13.25	7	protein metabolism;other metabolic processes;other biological processes	cytosol;nucleus	other molecular function	Pf00443, Pf00627, Pf02148, Pf17807	22225	ENSMUSG00000038429	Usp5	mmu:22225; P56399	Ub-specific processing proteases; Synthesis of active ubiquitin: roles of E1 and E2 enzymes		2	0	3.335	1
92	High	Master Protein	Q6PHS9	Voltage-dependent calcium channel subunit alpha-2/delta-2 [OS=Mus musculus]	0	63.73	14	13	24	13	1154	130.3	5.66	46.18	13	cell organization and biogenesis;transport;other biological processes	plasma membrane;other membranes	transporter activity;other molecular function	Pf00092, Pf08399, Pf08473	56808	ENSMUSG00000010066	Cacna2d2	B2RY16; mmu:56808; Q3TPT9; Q3TSS6; Q6PHS9; Q6REE3; Q8C8R8; Q8CHE9; Q920H5; Q920H6; Q9EQG2; Q9R142	Regulation of insulin secretion; Presynaptic depolarization and calcium channel opening; Phase 0 - rapid depolarisation; Phase 2 - plateau phase		4	0	3.333	1
93	High	Master Protein	P62259	14-3-3 protein epsilon [OS=Mus musculus]	0	62.779	55	12	41	10	255	29.2	4.74	64.7	12	stress response;transport;developmental processes;signal transduction;other biological processes	plasma membrane;other membranes;cytosol;cytoskeleton;nucleus;other cell component	other molecular function	Pf00244	22627	ENSMUSG00000020849	Ywhae	mmu:22627; P29360; P42655; P62259; Q63631	Regulation of PLK1 Activity at G2/M Transition; Regulation of HSF1-mediated heat shock response; RAB GEFs exchange GTP for GDP on RABs; Anchoring of the basal body to the plasma membrane; Loss of Nlp from mitotic centrosomes; Recruitment of mitotic centrosome proteins and complexes; Recruitment of NuMA to mitotic centrosomes; AURKA Activation by TPX2; TP53 Regulates Metabolic Genes; Activation of…	Myometrial relaxation and contraction pathways; Alpha 6 beta 4 integrin signaling pathway; Calcium regulation in cardiac cells	19	0	3.289	1
94	High	Master Protein	O08842	GDNF family receptor alpha-2 [OS=Mus musculus]	0	22.892	12	4	12	4	464	51.7	7.75	23.27	4	developmental processes;signal transduction;other biological processes	plasma membrane;other membranes;other cell component	other molecular function	Pf02351	14586	ENSMUSG00000022103	Gfra2	mmu:14586; O08842; Q3UUD8; Q920Y3; Q9Z2A2; Q9Z2A3	RAF/MAP kinase cascade; RET signaling		2	0	3.259	1
95	High	Master Protein	P12023	Amyloid-beta precursor protein [OS=Mus musculus]	0	61.305	13	12	38	10	770	86.7	4.79	69.28	12	cell adhesion;cell cycle OR cell proliferation;cell organization and biogenesis;protein metabolism;RNA metabolism OR transcription;other metabolic processes;stress response;transport;developmental processes;signal transduction;other biological processes	non-structural extracellular;plasma membrane;other membranes;cytoskeleton;mitochondrion;ER/Golgi;nucleus;other cytoplasmic organelle;other cell component	signal transduction activity or receptor binding;enzyme regulator activity;nucleic acid binding activity;other molecular function	Pf00014, Pf02177, Pf03494, Pf10515, Pf12924, Pf12925	11820	ENSMUSG00000022892	App	mmu:11820; P12023; P97487; P97942; Q99K32	Insertion of tail-anchored proteins into the endoplasmic reticulum membrane; Platelet degranulation ; ECM proteoglycans; G alpha (q) signalling events; Regulation of Insulin-like Growth Factor (IGF) transport and uptake by Insulin-like Growth Factor Binding Proteins (IGFBPs); Post-translational protein phosphorylation; G alpha (i) signalling events; Formyl peptide receptors bind formyl peptides a…	Alzheimer's disease; Delta-Notch signaling pathway	14	3	3.254	1
96	High	Master Protein	Q80TS3	Adhesion G protein-coupled receptor L3 [OS=Mus musculus]	0	90.433	15	17	41	17	1537	171	6.71	86.83	17	cell adhesion;cell organization and biogenesis;developmental processes;signal transduction;other biological processes	plasma membrane;other membranes;other cell component	other molecular function	Pf00002, Pf01825, Pf02140, Pf02191, Pf02354, Pf16489	319387	ENSMUSG00000037605	Adgrl3	mmu:319387; Q3UHI7; Q3UM79; Q504Z9; Q5HZJ6; Q80T56; Q80TS3		GPCRs, non-odorant ; GPCRs, class B secretin-like	2	0	3.248	1
97	High	Master Protein	P31650	Sodium- and chloride-dependent GABA transporter 3 [OS=Mus musculus]	0	22.515	10	6	19	6	627	69.9	6.98	45.36	6	transport;developmental processes;other biological processes	plasma membrane;other membranes;other cell component	transporter activity;other molecular function	Pf00209	243616	ENSMUSG00000030307	Slc6a11	mmu:243616; P31650; Q8BWA7	Na+/Cl- dependent neurotransmitter transporters; Creatine metabolism; Reuptake of GABA		3	0	3.24	1
98	High	Master Protein	Q9D172	Glutamine amidotransferase-like class 1 domain-containing protein 3, mitochondrial [OS=Mus musculus]	0	16.198	14	4	9	4	266	28.1	8.78	13.42	4					28295	ENSMUSG00000053329	Gatd3	mmu:28295; Q9D172			0	0	3.214	1
99	High	Master Protein	P10852	4F2 cell-surface antigen heavy chain [OS=Mus musculus]	0	49.498	26	11	28	11	526	58.3	5.91	55.17	11	other metabolic processes;transport;other biological processes	plasma membrane;other membranes;nucleus;other cytoplasmic organelle;other cell component	transporter activity;nucleic acid binding activity	Pf00128, Pf16028	17254	ENSMUSG00000010095	Slc3a2	G3UWA6; mmu:17254; P10852; Q54AH5	Amino acid transport across the plasma membrane; Tryptophan catabolism		2	0	3.193	1
100	High	Master Protein	P70207	Plexin-A2 [OS=Mus musculus]	0	68.286	11	18	32	9	1894	211.4	6.54	51.89	18	cell organization and biogenesis;developmental processes;signal transduction;other biological processes	plasma membrane;other membranes;other cell component	other molecular function	Pf01403, Pf01437, Pf01833, Pf08337, Pf17960, Pf18020, Pf20170	18845	ENSMUSG00000026640	Plxna2	mmu:18845; P70207; Q6NVE6; Q6PHN4; Q80TZ7; Q8R1I4	Sema3A PAK dependent Axon repulsion; CRMPs in Sema3A signaling; SEMA3A-Plexin repulsion signaling by inhibiting Integrin adhesion	Spinal cord injury	4	0	3.192	1
101	High	Master Protein	O54991	Contactin-associated protein 1 [OS=Mus musculus]	0	171.068	25	31	99	31	1385	156.2	7.06	214.72	31	cell adhesion;cell organization and biogenesis;developmental processes;other biological processes	plasma membrane;other membranes;other cell component	other molecular function	Pf00754, Pf02210	53321	ENSMUSG00000017167	Cntnap1	A2A4K6; mmu:53321; O54991			0	0	3.162	1
102	High	Master Protein	P70232	Neural cell adhesion molecule L1-like protein [OS=Mus musculus]	0	46.008	10	8	16	8	1209	135	5.57	39.11	8	cell adhesion;cell organization and biogenesis;stress response;developmental processes;other biological processes	non-structural extracellular;plasma membrane;other membranes;other cell component	other molecular function	Pf00041, Pf07679, Pf13882, Pf13927	12661	ENSMUSG00000030077	Chl1	A2RRK1; mmu:12661; P70232; Q8BS24; Q8C6W0; Q8C823; Q8VBY7		Splicing factor NOVA regulated synaptic proteins	1	0	3.152	1
103	High	Master Protein	Q8R4G0	Netrin-G1 [OS=Mus musculus]	0	26.729	12	6	13	6	539	60.5	6.24	29.91	6	cell adhesion;cell organization and biogenesis;developmental processes;other biological processes	plasma membrane;other membranes;other cell component	other molecular function	Pf00053, Pf00055	80883	ENSMUSG00000059857	Ntng1	mmu:80883; Q68FE5; Q69ZU3; Q8R4F3; Q8R4F4; Q8R4F5; Q8R4F6; Q8R4F7; Q8R4F8; Q8R4F9; Q8R4G0; Q9ESR3; Q9ESR4; Q9ESR5; Q9ESR6; Q9ESR7; Q9ESR8		Splicing factor NOVA regulated synaptic proteins	1	0	3.111	1
104	High	Master Protein	P61982	14-3-3 protein gamma [OS=Mus musculus]	0	105.691	53	13	73	7	247	28.3	4.89	123.56	13	transport;signal transduction;other biological processes	cytosol;other cell component	signal transduction activity or receptor binding;cytoskeletal activity;other molecular function	Pf00244	22628	ENSMUSG00000051391	Ywhag	mmu:22628; O70457; P35214; P61982; Q3UFD6; Q4FK44; Q9UDP2; Q9UN99	Anchoring of the basal body to the plasma membrane; Regulation of PLK1 Activity at G2/M Transition; Loss of Nlp from mitotic centrosomes; Recruitment of mitotic centrosome proteins and complexes; Recruitment of NuMA to mitotic centrosomes; AURKA Activation by TPX2; TP53 Regulates Metabolic Genes; Activation of BAD and translocation to mitochondria ; RHO GTPases activate PKNs; Chk1/Chk2(Cds1) medi…	Myometrial relaxation and contraction pathways; Calcium regulation in cardiac cells	14	7	3.1	1
105	High	Master Protein	O89053	Coronin-1A [OS=Mus musculus]	0	22.133	14	6	21	6	461	51	6.48	23.69	6	cell adhesion;cell cycle OR cell proliferation;cell organization and biogenesis;stress response;transport;signal transduction;other biological processes	plasma membrane;other membranes;cytosol;cytoskeleton;other cytoplasmic organelle;other cell component	cytoskeletal activity;other molecular function	Pf00400, Pf08953, Pf08954, Pf16300	12721	ENSMUSG00000030707	Coro1a	mmu:12721; O89053; Q7TMU0; Q9R1Y8; Q9R288			0	0	3.094	1
106	High	Master Protein	Q9DB72	BTB/POZ domain-containing protein 17 [OS=Mus musculus]	0	115.567	39	13	41	13	478	52.6	9.42	126.63	13		non-structural extracellular		Pf00651, Pf07707	72014	ENSMUSG00000000202	Btbd17	mmu:72014; Q9DB72			0	0	3.083	1
107	High	Master Protein	Q8K596	Sodium/calcium exchanger 2 [OS=Mus musculus]	0	34.818	14	9	25	9	921	100.6	5.12	31.51	9	cell organization and biogenesis;stress response;transport;other biological processes	plasma membrane;other membranes;cytoskeleton;mitochondrion;other cell component	transporter activity;other molecular function	Pf01699, Pf03160, Pf16494	110891	ENSMUSG00000030376	Slc8a2	mmu:110891; Q68EG0; Q8K596; Q8R504	Ion homeostasis; Reduction of cytosolic Ca++ levels; Sodium/Calcium exchangers		3	0	3.072	1
108	High	Master Protein	P68510	14-3-3 protein eta [OS=Mus musculus]	0	67.172	40	12	50	8	246	28.2	4.89	69.03	12	cell organization and biogenesis;other metabolic processes;transport;signal transduction;other biological processes	plasma membrane;other membranes;cytosol;other cell component	cytoskeletal activity;other molecular function	Pf00244	22629	ENSMUSG00000018965	Ywhah	mmu:22629; P11576; P68510; P70198; Q3TGZ9	TP53 Regulates Metabolic Genes; Activation of BAD and translocation to mitochondria ; RHO GTPases activate PKNs; Chk1/Chk2(Cds1) mediated inactivation of Cyclin B:Cdk1 complex	Myometrial relaxation and contraction pathways; Alpha 6 beta 4 integrin signaling pathway; Calcium regulation in cardiac cells	7	0	3.071	1
109	High	Master Protein	Q8VCC9	Spondin-1 [OS=Mus musculus]	0	15.066	7	5	10	5	807	90.8	6.02	17.13	5	cell adhesion;protein metabolism;other metabolic processes;other biological processes	non-structural extracellular;extracellular matrix	other molecular function	Pf00090, Pf02014, Pf06468, Pf19028	233744	ENSMUSG00000038156	Spon1	mmu:233744; Q8K2Q8; Q8VCC9	O-glycosylation of TSR domain-containing proteins		1	0	3.066	1
110	High	Master Protein	Q61792	LIM and SH3 domain protein 1 [OS=Mus musculus]	0	18.049	20	5	10	4	263	30	7.05	9.29	5	transport	cytoskeleton;other cell component	transporter activity;cytoskeletal activity;other molecular function	Pf00412, Pf00880, Pf14604	16796	ENSMUSG00000038366	Lasp1	mmu:16796; Q61792; Q62416			0	1	3.065	1
111	High	Master Protein	Q9CQA3	Succinate dehydrogenase [ubiquinone] iron-sulfur subunit, mitochondrial [OS=Mus musculus]	0	12.691	18	5	7	5	282	31.8	8.68	9.18	5	other metabolic processes	plasma membrane;other membranes;mitochondrion;nucleus	other molecular function	Pf13085, Pf13534	67680	ENSMUSG00000009863	Sdhb	mmu:67680; Q3TF82; Q9CQA3; Q9DC91	Citric acid cycle (TCA cycle)	Electron transport chain; TCA cycle	3	0	3.052	1
112	High	Master Protein	P60766	Cell division control protein 42 homolog [OS=Mus musculus]	0	38.019	52	6	22	5	191	21.2	6.55	40.3	6	cell adhesion;cell organization and biogenesis;protein metabolism;other metabolic processes;stress response;transport;developmental processes;signal transduction;other biological processes	plasma membrane;other membranes;cytosol;cytoskeleton;ER/Golgi;other cytoplasmic organelle;other cell component	signal transduction activity or receptor binding;other molecular function	Pf00071	12540	ENSMUSG00000006699	Cdc42	A2A9U6; mmu:12540; P21181; P25763; P60766; Q3THZ7; Q3TJK6; Q545V0; Q6P201; Q8BQ51	RHO GTPases Activate Formins; Regulation of actin dynamics for phagocytic cup formation; EPHB-mediated forward signaling; CDC42 GTPase cycle; RAC1 GTPase cycle; RHOQ GTPase cycle; Factors involved in megakaryocyte development and platelet production; EGFR downregulation; RHO GTPases activate IQGAPs; MAPK6/MAPK4 signaling; RHOG GTPase cycle; RHOU GTPase cycle; RAC2 GTPase cycle; RAC3 GTPase cycle;…	Oxidative damage response; BDNF pathway; Chemokine signaling pathway; G13 signaling pathway; p38 Mapk signaling pathway; IL-3 signaling pathway; Mapk signaling pathway; Regulation of actin cytoskeleton; Comprehensive IL-17A signaling; EGFR1 signaling pathway; Integrin-mediated cell adhesion; Focal adhesion	36	0	3.039	1
113	High	Master Protein	Q8BNA6	Protocadherin Fat 3 [OS=Mus musculus]	0	16.913	1	5	11	5	4555	501.7	4.87	10.27	5	cell adhesion;cell organization and biogenesis;developmental processes;other biological processes	plasma membrane;other membranes;other cell component	other molecular function	Pf00028, Pf02210		ENSMUSG00000074505	Fat3	Q08ED4; Q8BNA6			0	0	3.031	1
114	High	Master Protein	Q62443	Neuronal pentraxin-1 [OS=Mus musculus]	0	32.306	18	6	18	6	432	47.1	6.44	31.13	6	cell organization and biogenesis;transport;developmental processes;other biological processes	non-structural extracellular;plasma membrane;other membranes;mitochondrion;ER/Golgi;other cell component	other molecular function	Pf00354	18164	ENSMUSG00000025582	Nptx1	mmu:18164; Q62443			0	0	3.008	1	fold change >3
115	High	Master Protein	Q9JI18	Low-density lipoprotein receptor-related protein 1B [OS=Mus musculus]	0	16.743	1	7	11	7	4599	513.3	5.39	2.83	7	transport;developmental processes	plasma membrane;other membranes;other cell component	signal transduction activity or receptor binding;other molecular function	Pf00008, Pf00057, Pf00058, Pf07645, Pf12662, Pf14670, Pf16472			Lrp1b	Q8BZD3; Q8BZM7; Q9JI18			0	0	2.995	1
116	High	Master Protein	P63101	14-3-3 protein zeta/delta [OS=Mus musculus]	0	86.231	51	14	74	9	245	27.8	4.79	114.83	14	cell-cell signaling;cell organization and biogenesis;protein metabolism;other metabolic processes;stress response;transport;developmental processes;signal transduction;other biological processes	cytosol;nucleus;other cell component	other molecular function	Pf00244	22631	ENSMUSG00000022285	Ywhaz	mmu:22631; P35215; P63101; P70197; P97286; Q3TSF1; Q5EBQ1	Deactivation of the beta-catenin transactivating complex; TP53 Regulates Metabolic Genes; Activation of BAD and translocation to mitochondria ; RHO GTPases activate PKNs; Chk1/Chk2(Cds1) mediated inactivation of Cyclin B:Cdk1 complex; Rap1 signalling; GP1b-IX-V activation signalling; Interleukin-3, Interleukin-5 and GM-CSF signaling; Regulation of localization of FOXO transcription factors; NOTCH…	IL-5 signaling pathway; IL-3 signaling pathway; Myometrial relaxation and contraction pathways; Alpha 6 beta 4 integrin signaling pathway; Calcium regulation in cardiac cells	16	7	2.993	1
117	High	Master Protein	Q61598	Rab GDP dissociation inhibitor beta [OS=Mus musculus]	0	84.174	36	14	48	9	445	50.5	6.25	118.09	14	transport;signal transduction;other biological processes	other membranes;ER/Golgi;other cell component	enzyme regulator activity;other molecular function	Pf00996	14569	ENSMUSG00000021218	Gdi2	mmu:14569; Q541Z9; Q61598; Q8C530; Q9D8M9	Neutrophil degranulation; RAB GEFs exchange GTP for GDP on RABs		2	0	2.989	1
118	High	Master Protein	P07901	Heat shock protein HSP 90-alpha [OS=Mus musculus]	0	88.268	26	20	63	12	733	84.7	5.01	110.83	20	cell organization and biogenesis;DNA metabolism;other metabolic processes;stress response;transport;developmental processes;other biological processes	extracellular matrix;plasma membrane;other membranes;cytosol;cytoskeleton;mitochondrion;nucleus;other cell component	signal transduction activity or receptor binding;enzyme regulator activity;cytoskeletal activity;nucleic acid binding activity;other molecular function	Pf00183, Pf02518	15519	ENSMUSG00000021270	Hsp90aa1	mmu:15519; P07901	Neutrophil degranulation; Recruitment of NuMA to mitotic centrosomes; HSP90 chaperone cycle for steroid hormone receptors (SHR) in the presence of ligand; The role of GTSE1 in G2/M progression after G2 checkpoint; Regulation of actin dynamics for phagocytic cup formation; Downregulation of ERBB2 signaling; Anchoring of the basal body to the plasma membrane; Regulation of PLK1 Activity at G2/M Tra…	EBV LMP1 signaling; Focal adhesion: PI3K-Akt-mTOR signaling pathway; IL-6 signaling pathway; IL-2 signaling pathway	32	8	2.978	1
119	High	Master Protein	P02301	Histone H3.3C [OS=Mus musculus]	0	11.63	25	5	14	5	136	15.3	11.14	16.11	5	cell organization and biogenesis	nucleus;other cell component	nucleic acid binding activity;other molecular function	Pf00125			H3-5	P02301			0	0	2.97	1
120	High	Master Protein	P35486	Pyruvate dehydrogenase E1 component subunit alpha, somatic form, mitochondrial [OS=Mus musculus]	0	40.386	23	8	25	8	390	43.2	8.19	43.93	8	other metabolic processes	mitochondrion;nucleus;other cell component	other molecular function	Pf00676	18597	ENSMUSG00000031299	Pdha1	mmu:18597; P35486	Glyoxylate metabolism and glycine degradation; Regulation of pyruvate dehydrogenase (PDH) complex; Signaling by Retinoic Acid	Glycolysis and gluconeogenesis; Acetylcholine synthesis; TCA cycle; Amino acid metabolism	8	0	2.965	1
121	High	Master Protein	P11499	Heat shock protein HSP 90-beta [OS=Mus musculus]	0	101.296	30	20	68	10	724	83.2	5.03	139.73	20	cell organization and biogenesis;DNA metabolism;other metabolic processes;stress response;developmental processes;other biological processes	non-structural extracellular;plasma membrane;other membranes;cytosol;nucleus;other cytoplasmic organelle;other cell component	signal transduction activity or receptor binding;enzyme regulator activity;cytoskeletal activity;nucleic acid binding activity;other molecular function	Pf00183, Pf02518	15516	ENSMUSG00000023944	Hsp90ab1	mmu:15516; O89078; P11499; Q3UIQ7	Neutrophil degranulation; HSP90 chaperone cycle for steroid hormone receptors (SHR) in the presence of ligand; Regulation of actin dynamics for phagocytic cup formation; The role of GTSE1 in G2/M progression after G2 checkpoint; Attenuation phase; Estrogen-dependent gene expression; Sema3A PAK dependent Axon repulsion; Aryl hydrocarbon receptor signalling; DDX58/IFIH1-mediated induction of interf…	Focal adhesion: PI3K-Akt-mTOR signaling pathway	15	2	2.965	1
122	High	Master Protein	Q8VDM6	Heterogeneous nuclear ribonucleoprotein U-like protein 1 [OS=Mus musculus]	0	104.493	28	21	60	21	859	95.9	6.58	148.24	21		nucleus;other cell component	nucleic acid binding activity;other molecular function	Pf00622, Pf02037, Pf13671	232989	ENSMUSG00000040725	Hnrnpul1	mmu:232989; Q3U201; Q3UPB0; Q6AZA7; Q8BY45; Q8K365; Q8VDM6			0	0	2.959	1
123	High	Master Protein	P18760	Cofilin-1 [OS=Mus musculus]	0	28.839	48	5	12	4	166	18.5	8.09	25.26	5	cell cycle OR cell proliferation;cell organization and biogenesis;protein metabolism;other metabolic processes;stress response;transport;developmental processes;other biological processes	non-structural extracellular;plasma membrane;other membranes;cytosol;cytoskeleton;mitochondrion;nucleus;other cell component	signal transduction activity or receptor binding;cytoskeletal activity;other molecular function	Pf00241	12631	ENSMUSG00000056201	Cfl1	mmu:12631; P18760		G13 signaling pathway; Regulation of actin cytoskeleton	2	1	2.947	1
124	High	Master Protein	Q9Z2H5	Band 4.1-like protein 1 [OS=Mus musculus]	0	28.749	9	7	8	5	879	98.3	5.62	9.98	7	cell organization and biogenesis	plasma membrane;other membranes;cytosol;cytoskeleton;other cell component	signal transduction activity or receptor binding;cytoskeletal activity;other molecular function	Pf00373, Pf04382, Pf05902, Pf08736, Pf09379, Pf09380	13821		Epb41l1	mmu:13821; Q3U3L1; Q3UHP7; Q80U34; Q8K204; Q9Z2H5	Neurexins and neuroligins; Trafficking of AMPA receptors	Splicing factor NOVA regulated synaptic proteins	3	0	2.947	1
125	High	Master Protein	Q7TQI3	Ubiquitin thioesterase OTUB1 [OS=Mus musculus]	0	28.932	27	6	11	6	271	31.3	4.94	18.99	6	protein metabolism;DNA metabolism;other metabolic processes;stress response;other biological processes	nucleus;other cell component	other molecular function	Pf10275	107260	ENSMUSG00000024767	Otub1	mmu:107260; Q3ULV9; Q3V408; Q7TQI3; Q8C326; Q8R5F2	Ovarian tumor domain proteases; Ub-specific processing proteases		2	0	2.942	1
126	High	Master Protein	Q64332	Synapsin-2 [OS=Mus musculus]	0	99.944	31	15	65	12	586	63.3	8.43	167.82	15	cell-cell signaling;transport	plasma membrane;other membranes;ER/Golgi;other cell component	other molecular function	Pf02078, Pf02750, Pf10581	20965	ENSMUSG00000009394	Syn2	mmu:20965; Q64332; Q6NZR0; Q9QWV7	Dopamine Neurotransmitter Release Cycle; Serotonin Neurotransmitter Release Cycle		2	0	2.937	1
127	High	Master Protein	Q00898	Alpha-1-antitrypsin 1-5 [OS=Mus musculus]	0	58.612	22	8	47	5	413	45.9	5.73	96.04	8	other biological processes	non-structural extracellular;ER/Golgi;other cell component	enzyme regulator activity;other molecular function	Pf00079	20704	ENSMUSG00000072849	Serpina1e	mmu:20704; Q00898; Q3UJ83; Q545P1			0	0	2.935	1
128	High	Master Protein	Q9D6F4	Gamma-aminobutyric acid receptor subunit alpha-4 [OS=Mus musculus]	0	17.656	11	5	9	5	552	60.8	9.32	6.47	5	cell-cell signaling;transport;developmental processes;signal transduction;other biological processes	plasma membrane;other membranes;other cell component	transporter activity;other molecular function	Pf02931, Pf02932	14397	ENSMUSG00000029211	Gabra4	mmu:14397; Q9D6F4	GABA receptor activation		1	0	2.933	1
129	High	Master Protein	P47911	60S ribosomal protein L6 [OS=Mus musculus]	0	18.312	16	4	10	4	296	33.5	10.7	12.59	4	cell organization and biogenesis;protein metabolism;other metabolic processes	cytosol;cytoskeleton;ER/Golgi;translational apparatus;nucleus;other cell component	nucleic acid binding activity;other molecular function	Pf01159, Pf03868	19988	ENSMUSG00000029614	Rpl6	mmu:19988; P47911; Q6P5I2; Q925C3	L13a-mediated translational silencing of Ceruloplasmin expression; SRP-dependent cotranslational protein targeting to membrane; Major pathway of rRNA processing in the nucleolus and cytosol; Formation of a pool of free 40S subunits; GTP hydrolysis and joining of the 60S ribosomal subunit; Nonsense Mediated Decay (NMD) independent of the Exon Junction Complex (EJC); Nonsense Mediated Decay (NMD) e…	Cytoplasmic ribosomal proteins	8	0	2.932	1
130	High	Master Protein	P21460	Cystatin-C [OS=Mus musculus]	0	29.437	43	4	9	4	140	15.5	9	26.64	4	cell organization and biogenesis;stress response;other biological processes	non-structural extracellular;extracellular matrix;plasma membrane;other membranes;cytoskeleton;ER/Golgi;nucleus;other cytoplasmic organelle;other cell component	enzyme regulator activity;other molecular function	Pf00031	13010	ENSMUSG00000027447	Cst3	mmu:13010; P21460; Q544Y0	Neutrophil degranulation; Regulation of Insulin-like Growth Factor (IGF) transport and uptake by Insulin-like Growth Factor Binding Proteins (IGFBPs); Post-translational protein phosphorylation		3	0	2.93	1
131	High	Master Protein	Q61361	Brevican core protein [OS=Mus musculus]	0	137.012	32	27	125	27	883	95.8	4.93	254.83	27	cell adhesion;cell organization and biogenesis;developmental processes;other biological processes	non-structural extracellular;extracellular matrix;other cell component	other molecular function	Pf00008, Pf00059, Pf00084, Pf00193, Pf07686	12032	ENSMUSG00000004892	Bcan	mmu:12032; Q61361; Q80WT7	Degradation of the extracellular matrix; Dermatan sulfate biosynthesis; ECM proteoglycans; A tetrasaccharide linker sequence is required for GAG synthesis; Chondroitin sulfate biosynthesis; CS/DS degradation	Spinal cord injury	7	0	2.923	1
132	High	Master Protein	Q62059	Versican core protein [OS=Mus musculus]	0	111.209	6	19	87	19	3357	366.6	4.64	175.07	19	cell adhesion;developmental processes;other biological processes	non-structural extracellular;extracellular matrix;other cell component	other molecular function	Pf00008, Pf00059, Pf00084, Pf00193, Pf07686			Vcan	Q62058; Q62059; Q9CUU0	Regulation of Insulin-like Growth Factor (IGF) transport and uptake by Insulin-like Growth Factor Binding Proteins (IGFBPs); Post-translational protein phosphorylation; ECM proteoglycans; A tetrasaccharide linker sequence is required for GAG synthesis; Chondroitin sulfate biosynthesis; CS/DS degradation; Dermatan sulfate biosynthesis		7	0	2.913	1
133	High	Master Protein	P12960	Contactin-1 [OS=Mus musculus]	0	513.385	56	48	417	48	1020	113.3	6.16	1042.82	48	cell adhesion;cell organization and biogenesis;other metabolic processes;developmental processes;signal transduction;other biological processes	plasma membrane;other membranes;other cell component	other molecular function	Pf00041, Pf00047, Pf07679, Pf13927	12805	ENSMUSG00000055022	Cntn1	mmu:12805; P12960; Q6NXV7; Q8BR42; Q8C6A0		Delta-Notch signaling pathway	1	0	2.907	1
134	High	Master Protein	P25444	40S ribosomal protein S2 [OS=Mus musculus]	0	11.212	12	4	10	4	293	31.2	10.24	13.29	4	protein metabolism;other metabolic processes;other biological processes	cytosol;translational apparatus;nucleus;other cell component	nucleic acid binding activity;other molecular function	Pf00333, Pf03719	16898	ENSMUSG00000044533	Rps2	mmu:16898; P25444	L13a-mediated translational silencing of Ceruloplasmin expression; SRP-dependent cotranslational protein targeting to membrane; Major pathway of rRNA processing in the nucleolus and cytosol; Formation of a pool of free 40S subunits; GTP hydrolysis and joining of the 60S ribosomal subunit; Nonsense Mediated Decay (NMD) independent of the Exon Junction Complex (EJC); Nonsense Mediated Decay (NMD) e…	Cytoplasmic ribosomal proteins	13	0	2.904	1
135	High	Master Protein	P14231	Sodium/potassium-transporting ATPase subunit beta-2 [OS=Mus musculus]	0	28.847	22	4	14	4	290	33.3	8.31	40.93	4	cell adhesion;cell organization and biogenesis;transport;developmental processes;other biological processes	plasma membrane;other membranes;other cell component	transporter activity;other molecular function	Pf00287	11932	ENSMUSG00000041329	Atp1b2	mmu:11932; P14231	Ion homeostasis; Ion transport by P-type ATPases	Calcium regulation in cardiac cells	3	0	2.896	1
136	High	Master Protein	P11983	T-complex protein 1 subunit alpha [OS=Mus musculus]	0	27.459	12	6	11	6	556	60.4	6.16	20.16	6	transport;other biological processes	cytosol;cytoskeleton;ER/Golgi;other cell component	other molecular function	Pf00118	21454	ENSMUSG00000068039	Tcp1	mmu:21454; P11983; P11984; Q3TJ96; Q3TKU1; Q3U5T8; Q3U7I8; Q3UAA8; Q3UB80; Q3UE48	Cooperation of PDCL (PhLP1) and TRiC/CCT in G-protein beta folding; Association of TriC/CCT with target proteins during biosynthesis		2	0	2.896	1
137	High	Master Protein	Q8CJH3	Plexin-B1 [OS=Mus musculus]	0	41.124	5	10	22	10	2119	231.2	5.55	37.3	10	cell organization and biogenesis;developmental processes;signal transduction;other biological processes	plasma membrane;other membranes;other cell component	other molecular function	Pf01403, Pf01437, Pf01833, Pf08337, Pf17960, Pf18020, Pf20170	235611	ENSMUSG00000053646	Plxnb1	E9QKS4; mmu:235611; Q6ZQC3; Q80ZZ1; Q8CJH3	G alpha (12/13) signalling events; RHOD GTPase cycle; Sema4D mediated inhibition of cell attachment and migration; Sema4D induced cell migration and growth-cone collapse		4	0	2.88	1
138	High	Master Protein	P51655	Glypican-4 [OS=Mus musculus]	0	15.006	7	4	5	4	557	62.5	6.33	5.22	4	cell adhesion;cell-cell signaling;cell organization and biogenesis;signal transduction;other biological processes	plasma membrane;other membranes;ER/Golgi;other cell component		Pf01153	14735	ENSMUSG00000031119	Gpc4	mmu:14735; P51655; Q923C8	Retinoid metabolism and transport; A tetrasaccharide linker sequence is required for GAG synthesis; HS-GAG biosynthesis; HS-GAG degradation		4	0	2.879	1
139	High	Master Protein	Q8C419	Probable G-protein coupled receptor 158 [OS=Mus musculus]	0	253.945	42	44	164	44	1200	134.3	8.09	376.28	44	signal transduction;other biological processes	plasma membrane;other membranes	other molecular function	Pf00003	241263	ENSMUSG00000045967	Gpr158	B1AWY4; mmu:241263; Q8C419; Q8CHB0		GPCRs, odorant	1	0	2.874	1
140	High	Master Protein	Q6PIE5	Sodium/potassium-transporting ATPase subunit alpha-2 [OS=Mus musculus]	0	199.843	36	33	180	15	1020	112.1	5.55	388.29	33	other metabolic processes;stress response;transport;developmental processes;other biological processes	plasma membrane;other membranes;other cytoplasmic organelle;other cell component	transporter activity;other molecular function	Pf00122, Pf00689, Pf00690, Pf00702, Pf13246	98660	ENSMUSG00000007097	Atp1a2	mmu:98660; Q6PIE5; Q80UZ8	Ion homeostasis; Ion transport by P-type ATPases		2	2	2.873	1
141	High	Master Protein	Q8CBE3	WD repeat-containing protein 37 [OS=Mus musculus]	0	20.785	12	6	10	6	496	55	7.23	12.15	6	developmental processes;other biological processes	nucleus;other cell component		Pf00400	207615	ENSMUSG00000021147	Wdr37	mmu:207615; Q80Y96; Q8CBE3; Q8CCL2			0	0	2.871	1
142	High	Master Protein	O35098	Dihydropyrimidinase-related protein 4 [OS=Mus musculus]	0	28.034	13	5	7	4	572	61.9	6.98	15.73	5		cytosol	cytoskeletal activity;other molecular function	Pf01979			Dpysl4	O08886; O35098; Q3UL94	CRMPs in Sema3A signaling		1	0	2.867	1
143	High	Master Protein	P53994	Ras-related protein Rab-2A [OS=Mus musculus]	0	61.054	59	12	39	12	212	23.5	6.54	76.42	12	cell organization and biogenesis;transport	other membranes;ER/Golgi;other cell component	other molecular function	Pf00071	59021	ENSMUSG00000047187	Rab2a	mmu:59021; P53994; Q3UK45	RAB geranylgeranylation; Golgi Cisternae Pericentriolar Stack Reorganization	Focal adhesion: PI3K-Akt-mTOR signaling pathway	3	0	2.857	1
144	High	Master Protein	Q6ZWN5	40S ribosomal protein S9 [OS=Mus musculus]	0	10.863	18	4	12	4	194	22.6	10.65	9.43	4	protein metabolism;other metabolic processes;other biological processes	cytosol;translational apparatus;nucleus;other cell component	nucleic acid binding activity;other molecular function	Pf00163, Pf01479	76846	ENSMUSG00000006333	Rps9	mmu:76846; Q3UBF1; Q6ZWN5; Q8K2D1	L13a-mediated translational silencing of Ceruloplasmin expression; SRP-dependent cotranslational protein targeting to membrane; Major pathway of rRNA processing in the nucleolus and cytosol; Formation of a pool of free 40S subunits; GTP hydrolysis and joining of the 60S ribosomal subunit; Nonsense Mediated Decay (NMD) independent of the Exon Junction Complex (EJC); Nonsense Mediated Decay (NMD) e…	mRNA processing	11	0	2.853	1
145	High	Master Protein	O55131	Septin-7 [OS=Mus musculus]	0	54.471	27	10	36	9	436	50.5	8.57	44.66	10	cell cycle OR cell proliferation;cell organization and biogenesis;developmental processes;other biological processes	plasma membrane;other membranes;cytoskeleton;nucleus;other cell component	other molecular function	Pf00735	235072		Septin7	mmu:235072; O55131	MAPK6/MAPK4 signaling		1	1	2.853	1
146	High	Master Protein	Q8K406	Leucine-rich repeat LGI family member 3 [OS=Mus musculus]	0	28.762	16	8	20	8	548	61.8	8.16	34.13	8	transport;other biological processes	non-structural extracellular;ER/Golgi;other cell component		Pf03736, Pf13855	213469	ENSMUSG00000033595	Lgi3	mmu:213469; Q8K406	LGI-ADAM interactions		1	0	2.85	1
147	High	Master Protein	P70663	SPARC-like protein 1 [OS=Mus musculus]	0	46.355	24	11	22	11	650	72.2	4.6	23.87	11	cell adhesion;cell organization and biogenesis;signal transduction;other biological processes	non-structural extracellular;extracellular matrix;other cell component	other molecular function	Pf07648, Pf09289, Pf10591	13602	ENSMUSG00000029309	Sparcl1	E9QPH2; mmu:13602; P70663; P97810; Q99L82	Regulation of Insulin-like Growth Factor (IGF) transport and uptake by Insulin-like Growth Factor Binding Proteins (IGFBPs); Post-translational protein phosphorylation		2	0	2.847	1
148	High	Master Protein	Q80VP0	Tectonin beta-propeller repeat-containing protein 1 [OS=Mus musculus]	0	19.086	7	7	15	7	1166	130.2	6.48	16.68	7	cell organization and biogenesis;other metabolic processes;other biological processes	other membranes;nucleus;other cytoplasmic organelle;other cell component	other molecular function	Pf06398, Pf19193	70381	ENSMUSG00000066621	Tecpr1	mmu:70381; Q80VP0; Q8CHA3; Q8R3E0; Q99KQ5; Q9CVC6			0	0	2.84	1
149	High	Master Protein	P27659	60S ribosomal protein L3 [OS=Mus musculus]	0	12.523	9	4	9	4	403	46.1	10.21	8.67	4	protein metabolism;other metabolic processes;other biological processes	cytosol;translational apparatus;nucleus;other cell component	nucleic acid binding activity;other molecular function	Pf00297	27367	ENSMUSG00000060036	Rpl3	mmu:27367; O89071; P27659; Q91VJ6	L13a-mediated translational silencing of Ceruloplasmin expression; SRP-dependent cotranslational protein targeting to membrane; Major pathway of rRNA processing in the nucleolus and cytosol; Formation of a pool of free 40S subunits; GTP hydrolysis and joining of the 60S ribosomal subunit; Nonsense Mediated Decay (NMD) independent of the Exon Junction Complex (EJC); Nonsense Mediated Decay (NMD) e…	Cytoplasmic ribosomal proteins	8	0	2.838	1
150	High	Master Protein	P62631	Elongation factor 1-alpha 2 [OS=Mus musculus]	0	96.118	41	15	80	8	463	50.4	9.03	186.97	15	protein metabolism;other metabolic processes;other biological processes	nucleus;other cell component	nucleic acid binding activity;other molecular function	Pf00009, Pf03143, Pf03144	13628	ENSMUSG00000016349	Eef1a2	mmu:13628; P27706; P62631		Translation factors	1	7	2.814	1
151	High	Master Protein	Q9Z2I9	Succinate--CoA ligase [ADP-forming] subunit beta, mitochondrial [OS=Mus musculus]	0	14.97	10	5	11	5	463	50.1	7.01	12.49	5	other metabolic processes	other cell component	other molecular function	Pf00549, Pf08442	20916	ENSMUSG00000022110	Sucla2	mmu:20916; Q3TVH1; Q8BGS6; Q9Z2I9	Citric acid cycle (TCA cycle)	TCA cycle	2	0	2.809	1
152	High	Master Protein	P62281	40S ribosomal protein S11 [OS=Mus musculus]	0	20.4	44	7	19	7	158	18.4	10.3	11.9	7	protein metabolism;other metabolic processes;other biological processes	cytosol;translational apparatus;nucleus;other cell component	nucleic acid binding activity;other molecular function	Pf00366, Pf16205	27207	ENSMUSG00000003429	Rps11	mmu:27207; P04643; P62281	L13a-mediated translational silencing of Ceruloplasmin expression; GTP hydrolysis and joining of the 60S ribosomal subunit; Translation initiation complex formation; Ribosomal scanning and start codon recognition; SRP-dependent cotranslational protein targeting to membrane; Major pathway of rRNA processing in the nucleolus and cytosol; Formation of a pool of free 40S subunits; Nonsense Mediated D…	Cytoplasmic ribosomal proteins; mRNA processing	12	0	2.809	1
153	High	Master Protein	Q61316	Heat shock 70 kDa protein 4 [OS=Mus musculus]	0	39.804	15	11	18	9	841	94.1	5.24	13.91	11	cell organization and biogenesis;stress response;transport;other biological processes	non-structural extracellular;cytosol;mitochondrion;nucleus;other cell component	other molecular function	Pf00012			Hspa4	Q61316	Regulation of HSF1-mediated heat shock response		1	1	2.808	1
154	High	Master Protein	P14094	Sodium/potassium-transporting ATPase subunit beta-1 [OS=Mus musculus]	0	64.122	35	11	65	11	304	35.2	8.65	116.63	11	cell adhesion;other metabolic processes;stress response;transport;signal transduction;other biological processes	plasma membrane;other membranes;cytoskeleton;other cell component	transporter activity;other molecular function	Pf00287	11931	ENSMUSG00000026576	Atp1b1	mmu:11931; P14094	Ion homeostasis; Ion transport by P-type ATPases	Calcium regulation in cardiac cells	3	0	2.806	1
155	High	Master Protein	P62874	Guanine nucleotide-binding protein G(I)/G(S)/G(T) subunit beta-1 [OS=Mus musculus]	0	97.633	48	13	76	7	340	37.4	6	210.59	13	cell cycle OR cell proliferation;stress response;developmental processes;signal transduction;other biological processes	plasma membrane;other membranes;other cell component	cytoskeletal activity;other molecular function	Pf00400	14688	ENSMUSG00000029064	Gnb1	mmu:14688; P04697; P04901; P62874	Presynaptic function of Kainate receptors; G alpha (i) signalling events; Extra-nuclear estrogen signaling; Thrombin signalling through proteinase activated receptors (PARs); ADP signalling through P2Y purinoceptor 1; G alpha (12/13) signalling events; Olfactory Signaling Pathway; G alpha (q) signalling events; Ca2+ pathway; G beta:gamma signalling through PLC beta; ADP signalling through P2Y pur…	Estrogen signaling; Chemokine signaling pathway; G protein signaling pathways; Focal adhesion: PI3K-Akt-mTOR signaling pathway; Myometrial relaxation and contraction pathways; Calcium regulation in cardiac cells	36	7	2.797	1
156	High	Master Protein	Q99P47	Contactin-associated protein-like 4 [OS=Mus musculus]	0	26.566	5	6	13	5	1310	144.6	7.06	17.97	6	cell adhesion;cell cycle OR cell proliferation;developmental processes;other biological processes	plasma membrane;other membranes;other cell component	other molecular function	Pf00754, Pf02210	170571	ENSMUSG00000031772	Cntnap4	mmu:170571; Q8K002; Q99P47			0	1	2.795	1
157	High	Master Protein	P20917	Myelin-associated glycoprotein [OS=Mus musculus]	0	77.145	28	12	57	12	627	69.3	5.1	149.92	12	cell adhesion;cell organization and biogenesis;stress response;developmental processes;other biological processes	plasma membrane;other membranes;other cell component	signal transduction activity or receptor binding;other molecular function	Pf08205, Pf13927	17136	ENSMUSG00000036634	Mag	A0A087WPR1; mmu:17136; P16880; P20917	Axonal growth inhibition (RHOA activation)	Spinal cord injury	2	0	2.792	1
158	High	Master Protein	Q80V42	Carboxypeptidase M [OS=Mus musculus]	0	38.615	16	7	21	7	443	50.5	7.78	50.91	7	protein metabolism;other metabolic processes	non-structural extracellular;plasma membrane;other membranes	other molecular function	Pf00246, Pf13620	70574	ENSMUSG00000020183	Cpm	mmu:70574; Q497S5; Q80V42; Q9CYH8	Post-translational modification: synthesis of GPI-anchored proteins		1	0	2.785	1
159	High	Master Protein	P14152	Malate dehydrogenase, cytoplasmic [OS=Mus musculus]	0	46.091	33	9	37	9	334	36.5	6.58	79.93	9	other metabolic processes	cytosol;cytoskeleton;other cell component	other molecular function	Pf00056, Pf02866	17449	ENSMUSG00000020321	Mdh1	mmu:17449; P14152; Q3TP22; Q80Y13; Q9DB45	Gluconeogenesis	Glycolysis and gluconeogenesis; TCA cycle	3	0	2.78	1
160	High	Master Protein	Q8BFR5	Elongation factor Tu, mitochondrial [OS=Mus musculus]	0	31.317	23	8	15	8	452	49.5	7.56	32.52	8	protein metabolism;other metabolic processes;other biological processes	mitochondrion;other cell component	nucleic acid binding activity;other molecular function	Pf00009, Pf03143, Pf03144	233870	ENSMUSG00000073838	Tufm	mmu:233870; Q497E7; Q6P919; Q8BFR5			0	0	2.777	1
161	High	Master Protein	Q920I9	WD repeat-containing protein 7 [OS=Mus musculus]	0	27.095	6	8	11	8	1489	163.3	6.9	5.46	8	other biological processes	ER/Golgi;other cell component		Pf00400	104082	ENSMUSG00000040560	Wdr7	mmu:104082; Q059Q1; Q3U440; Q80TY3; Q920I9; Q920J0			0	0	2.774	1
162	High	Master Protein	P31648	Sodium- and chloride-dependent GABA transporter 1 [OS=Mus musculus]	0	23.519	10	5	15	5	599	67	7.96	36.19	5	cell organization and biogenesis;transport;other biological processes	plasma membrane;other membranes;other cell component	transporter activity;other molecular function	Pf00209	232333	ENSMUSG00000030310	Slc6a1	mmu:232333; P31648	Na+/Cl- dependent neurotransmitter transporters; Reuptake of GABA		2	0	2.773	1
163	High	Master Protein	P10126	Elongation factor 1-alpha 1 [OS=Mus musculus]	0	91.685	36	14	78	7	462	50.1	9.01	192.94	14	protein metabolism;other metabolic processes;other biological processes	plasma membrane;other membranes;cytosol;cytoskeleton;nucleus;other cell component	nucleic acid binding activity;other molecular function	Pf00009, Pf03143, Pf03144	13627	ENSMUSG00000037742	Eef1a1	mmu:13627; P10126; Q61511; Q6ZWN2; Q8BMB8; Q8BVS8; Q99KU5	Neutrophil degranulation; Eukaryotic Translation Elongation; HSF1 activation; Protein methylation	Translation factors; EGFR1 signaling pathway	6	0	2.773	1
164	High	Master Protein	Q8BPN8	DmX-like protein 2 [OS=Mus musculus]	0	26.05	3	7	13	7	3032	338	6.42	12.91	7	cell-cell signaling;developmental processes;other biological processes	other membranes;ER/Golgi;other cell component	other molecular function	Pf00400, Pf12234	235380	ENSMUSG00000041268	Dmxl2	B0V2P4; Q3TNY5; Q69ZX5; Q8BPN8; Q8CCU3			0	0	2.764	1
165	High	Master Protein	Q9JMB8	Contactin-6 [OS=Mus musculus]	0	18.388	7	5	10	5	1028	113.7	6.64	15.67	5	cell adhesion;cell organization and biogenesis;developmental processes;signal transduction;other biological processes	plasma membrane;other membranes;other cell component	other molecular function	Pf00041, Pf07679, Pf13927	53870	ENSMUSG00000030092	Cntn6	mmu:53870; Q8C6X1; Q9JMB8			0	0	2.752	1
166	High	Master Protein	P67778	Prohibitin 1 [OS=Mus musculus]	0	13.665	15	4	7	4	272	29.8	5.76	7.06	4	cell organization and biogenesis;DNA metabolism;RNA metabolism OR transcription;other metabolic processes;stress response;developmental processes;signal transduction;other biological processes	plasma membrane;other membranes;mitochondrion;nucleus;other cytoplasmic organelle;other cell component	signal transduction activity or receptor binding;other molecular function	Pf01145	18673	ENSMUSG00000038845	Phb1	mmu:18673; P24142; P67778; Q3UB75; Q5SQG4	RAF activation; Processing of SMDT1		2	0	2.745	1
167	High	Master Protein	P19096	Fatty acid synthase [OS=Mus musculus]	0	22.246	3	6	8	6	2504	272.3	6.58	14.53	6	other metabolic processes;stress response;other biological processes	plasma membrane;other membranes;cytosol;ER/Golgi;other cell component	other molecular function	Pf00107, Pf00109, Pf00550, Pf00698, Pf00975, Pf02801, Pf08242, Pf08659, Pf14765, Pf16197	14104	ENSMUSG00000025153	Fasn	B1ATU8; mmu:14104; P19096; Q6PB72; Q8C4Z0; Q9EQR0	ChREBP activates metabolic gene expression; Fatty acyl-CoA biosynthesis; Vitamin B5 (pantothenate) metabolism	Fatty acid biosynthesis; Dysregulated miRNA targeting in insulin/PI3K-AKT signaling; Cholesterol metabolism with Bloch and Kandutsch-Russell pathways; Omega-9 fatty acid synthesis; Elongation of (very) long chain fatty acids	8	0	2.743	1
168	High	Master Protein	Q9EP69	Phosphatidylinositol-3-phosphatase SAC1 [OS=Mus musculus]	0	14.179	8	5	11	5	587	66.9	7.3	4.52	5	other metabolic processes;transport	plasma membrane;other membranes;ER/Golgi;other cell component	other molecular function	Pf02383	83493	ENSMUSG00000025240	Sacm1l	mmu:83493; Q80TQ1; Q99K33; Q9EP69	Synthesis of PIPs at the ER membrane; Synthesis of PIPs at the Golgi membrane		2	0	2.736	1
169	High	Master Protein	P17426	AP-2 complex subunit alpha-1 [OS=Mus musculus]	0	63.236	21	18	44	9	977	107.6	7.03	63.67	18	transport;other biological processes	plasma membrane;other membranes;other cell component	signal transduction activity or receptor binding;other molecular function	Pf01602, Pf02296, Pf02883	11771	ENSMUSG00000060279	Ap2a1	mmu:11771; P17426	Cargo recognition for clathrin-mediated endocytosis; VLDLR internalisation and degradation; MHC class II antigen presentation; Recycling pathway of L1; LDL clearance; Trafficking of GluR2-containing AMPA receptors; Retrograde neurotrophin signalling; WNT5A-dependent internalization of FZD4; WNT5A-dependent internalization of FZD2, FZD5 and ROR2	EGFR1 signaling pathway	11	7	2.734	1
170	High	Master Protein	Q91VR2	ATP synthase subunit gamma, mitochondrial [OS=Mus musculus]	0	40.796	28	7	28	7	298	32.9	9.01	56.63	7	other metabolic processes;transport	other membranes;mitochondrion	transporter activity;other molecular function	Pf00231	11949	ENSMUSG00000025781	Atp5f1c	mmu:11949; Q91VR2	Formation of ATP by chemiosmotic coupling; Cristae formation	Electron transport chain	3	0	2.73	1
171	High	Master Protein	Q8C8R3	Ankyrin-2 [OS=Mus musculus]	0	65.658	5	15	28	13	3898	426	5.17	52.77	15	cell-cell signaling;cell organization and biogenesis;transport;developmental processes;signal transduction;other biological processes	plasma membrane;other membranes;cytoskeleton;mitochondrion;other cytoplasmic organelle;other cell component	cytoskeletal activity;other molecular function	Pf00531, Pf00791, Pf12796, Pf13637, Pf17809	109676	ENSMUSG00000032826	Ank2	mmu:109676; Q3TM62; Q3V2X0; Q6PCN2; Q80ZZ7; Q8BNC1; Q8C445; Q8C8R3; Q8CCV0			0	1	2.715	1
172	High	Master Protein	P59999	Actin-related protein 2/3 complex subunit 4 [OS=Mus musculus]	0	24.419	53	7	16	7	168	19.7	8.43	21.77	7	cell organization and biogenesis	cytoskeleton;nucleus;other cell component	cytoskeletal activity;other molecular function	Pf05856	68089	ENSMUSG00000079426	Arpc4	mmu:68089; O15509; P59999; Q3UWV4	Regulation of actin dynamics for phagocytic cup formation; RHO GTPases Activate WASPs and WAVEs; Clathrin-mediated endocytosis; EPHB-mediated forward signaling		4	0	2.711	1
173	High	Master Protein	Q91V14	Solute carrier family 12 member 5 [OS=Mus musculus]	0	63.012	15	13	32	13	1138	126.2	6.74	75.65	13	cell-cell signaling;cell organization and biogenesis;stress response;transport;developmental processes;other biological processes	plasma membrane;other membranes;other cell component	transporter activity;other molecular function	Pf00324, Pf03522	57138	ENSMUSG00000017740	Slc12a5	A2A5L0; mmu:57138; Q3UHQ2; Q7TQC9; Q80TI5; Q91V14; Q9Z0M7	Cation-coupled Chloride cotransporters		1	0	2.71	1
174	High	Master Protein	P10493	Nidogen-1 [OS=Mus musculus]	0	61.503	16	14	24	13	1245	136.5	5.44	34.59	14	cell adhesion;cell-cell signaling;cell organization and biogenesis;developmental processes;signal transduction;other biological processes	non-structural extracellular;extracellular matrix;other cell component	other molecular function	Pf00058, Pf00086, Pf06119, Pf07474, Pf07645, Pf12662, Pf12947, Pf14670	18073	ENSMUSG00000005397	Nid1	mmu:18073; P10493; Q3TKX9; Q8BQI3; Q8C3U8; Q8C9P6	Laminin interactions; Degradation of the extracellular matrix		2	0	2.701	1
175	High	Master Protein	P17427	AP-2 complex subunit alpha-2 [OS=Mus musculus]	0	63.009	21	15	41	6	938	104	6.93	79.85	15	transport;other biological processes	plasma membrane;other membranes;ER/Golgi;other cell component	other molecular function	Pf01602, Pf02296, Pf02883	11772	ENSMUSG00000002957	Ap2a2	mmu:11772; P17427; Q8C2J5; Q921V0	MHC class II antigen presentation; Neutrophil degranulation; Recycling pathway of L1; Cargo recognition for clathrin-mediated endocytosis; LDL clearance; Trafficking of GluR2-containing AMPA receptors; Retrograde neurotrophin signalling; WNT5A-dependent internalization of FZD4; WNT5A-dependent internalization of FZD2, FZD5 and ROR2; VLDLR internalisation and degradation		11	0	2.695	1
176	High	Master Protein	Q9JHU4	Cytoplasmic dynein 1 heavy chain 1 [OS=Mus musculus]	0	58.89	4	15	28	15	4644	531.7	6.42	54.06	15	cell cycle OR cell proliferation;cell organization and biogenesis;transport;other biological processes	cytoskeleton;nucleus;other cell component	cytoskeletal activity;other molecular function	Pf03028, Pf08385, Pf08393, Pf12774, Pf12775, Pf12777, Pf12780, Pf12781, Pf17852, Pf18198, Pf18199	13424	ENSMUSG00000018707	Dync1h1	E9QM71; mmu:13424; Q9JHU4	MHC class II antigen presentation; COPI-mediated anterograde transport; Neutrophil degranulation; Separation of Sister Chromatids; Anchoring of the basal body to the plasma membrane; Amplification of signal from unattached kinetochores via a MAD2 inhibitory signal; Resolution of Sister Chromatid Cohesion; Regulation of PLK1 Activity at G2/M Transition; Loss of Nlp from mitotic centrosomes; Recrui…		19	0	2.695	1
177	High	Master Protein	P28660	Nck-associated protein 1 [OS=Mus musculus]	0	21.135	5	6	9	6	1128	128.7	6.62	7.25	6	cell organization and biogenesis;developmental processes;signal transduction;other biological processes	plasma membrane;other membranes;cytoskeleton;other cell component	other molecular function	Pf09735	50884	ENSMUSG00000027002	Nckap1	mmu:50884; P28660; Q3UPY6; Q80TX0; Q8CG49; Q99KY0	VEGFA-VEGFR2 Pathway; Regulation of actin dynamics for phagocytic cup formation; RAC1 GTPase cycle; RAC2 GTPase cycle; RAC3 GTPase cycle; RHO GTPases Activate WASPs and WAVEs	Regulation of actin cytoskeleton; Exercise-induced circadian regulation	8	0	2.688	1
178	High	Master Protein	Q91V12	Cytosolic acyl coenzyme A thioester hydrolase [OS=Mus musculus]	0	53.179	33	11	26	11	381	42.5	8.68	78.61	11	other metabolic processes	cytosol;mitochondrion;nucleus;other cell component	other molecular function	Pf03061	70025	ENSMUSG00000028937	Acot7	A2A8K9; A2A8L0; A2A8L2; mmu:70025; Q3U8C6; Q59HQ2; Q91V12	Mitochondrial Fatty Acid Beta-Oxidation		1	0	2.671	1
179	High	Master Protein	P05064	Fructose-bisphosphate aldolase A [OS=Mus musculus]	0	117.453	62	21	70	20	364	39.3	8.09	172.8	21	cell organization and biogenesis;other metabolic processes;other biological processes	non-structural extracellular;plasma membrane;other membranes;cytosol;cytoskeleton;mitochondrion;other cell component	cytoskeletal activity;other molecular function	Pf00274	11674	ENSMUSG00000030695	Aldoa	mmu:11674; P05064	Gluconeogenesis; Glycolysis; Neutrophil degranulation; Platelet degranulation	Glycolysis and gluconeogenesis	5	1	2.663	1
180	High	Master Protein	P48722	Heat shock 70 kDa protein 4L [OS=Mus musculus]	0	17.273	8	6	6	5	838	94.3	5.74	4.93	6	stress response;other biological processes	cytosol;nucleus;other cell component	other molecular function	Pf00012	18415	ENSMUSG00000025757	Hspa4l	mmu:18415; P48722; P97854; Q3TQN2; Q3UNG4; Q8BQD0; Q8CC45; Q91X29	Regulation of HSF1-mediated heat shock response		1	0	2.656	1
181	High	Master Protein	Q03157	Amyloid beta precursor like protein 1 [OS=Mus musculus]	0	26.605	10	6	21	6	654	72.8	5.67	24.57	6	cell adhesion;cell organization and biogenesis;RNA metabolism OR transcription;other metabolic processes;transport;developmental processes;other biological processes	plasma membrane;other membranes;ER/Golgi;nucleus;other cell component	signal transduction activity or receptor binding;other molecular function	Pf02177, Pf10515, Pf12924, Pf12925	11803	ENSMUSG00000006651	Aplp1	A0A0R4IZZ1; mmu:11803; Q03157; Q3U311; Q8VC38			0	0	2.652	1
182	High	Master Protein	Q8BH59	Electrogenic aspartate/glutamate antiporter SLC25A12, mitochondrial [OS=Mus musculus]	0	62.575	29	16	48	16	677	74.5	8.25	79.35	16	other metabolic processes;transport;other biological processes	other membranes;mitochondrion	transporter activity;other molecular function	Pf00153	78830	ENSMUSG00000027010	Slc25a12	A2BFG0; mmu:78830; Q8BH59	Gluconeogenesis; Aspartate and asparagine metabolism		2	0	2.647	1
183	High	Master Protein	P61027	Ras-related protein Rab-10 [OS=Mus musculus]	0	33.229	31	7	48	4	200	22.5	8.38	89.48	7	cell cycle OR cell proliferation;cell organization and biogenesis;transport;developmental processes;other biological processes	plasma membrane;other membranes;cytoskeleton;ER/Golgi;other cytoplasmic organelle;other cell component	cytoskeletal activity;other molecular function	Pf00071	19325	ENSMUSG00000020671	Rab10	mmu:19325; O88386; P61027; Q9D7X6	Neutrophil degranulation; RAB GEFs exchange GTP for GDP on RABs; RAB geranylgeranylation	Focal adhesion: PI3K-Akt-mTOR signaling pathway; Comprehensive IL-17A signaling	5	0	2.646	1
184	High	Master Protein	P61205	ADP-ribosylation factor 3 [OS=Mus musculus]	0	118.536	65	12	47	7	181	20.6	7.43	129.72	12	transport	plasma membrane;other membranes;ER/Golgi;other cell component	other molecular function	Pf00025	11842	ENSMUSG00000051853	Arf3	mmu:11842; P16587; P61205	COPI-dependent Golgi-to-ER retrograde traffic; COPI-mediated anterograde transport; Synthesis of PIPs at the Golgi membrane		3	5	2.646	1
185	High	Master Protein	Q9CVB6	Actin-related protein 2/3 complex subunit 2 [OS=Mus musculus]	0	40.249	30	9	27	9	300	34.3	7.36	39.29	9	cell organization and biogenesis;signal transduction;other biological processes	plasma membrane;other membranes;cytoskeleton;nucleus;other cytoplasmic organelle;other cell component	signal transduction activity or receptor binding;cytoskeletal activity;other molecular function	Pf04045	76709	ENSMUSG00000006304	Arpc2	mmu:76709; Q3U870; Q9CVB6	Regulation of actin dynamics for phagocytic cup formation; Clathrin-mediated endocytosis; EPHB-mediated forward signaling; RHO GTPases Activate WASPs and WAVEs	Comprehensive IL-17A signaling	5	0	2.641	1
186	High	Master Protein	P39053	Dynamin-1 [OS=Mus musculus]	0	211.303	49	39	136	31	867	97.7	7.74	263.24	39	cell organization and biogenesis;transport;other biological processes	plasma membrane;other membranes;cytoskeleton;ER/Golgi;other cell component	signal transduction activity or receptor binding;cytoskeletal activity;other molecular function	Pf00169, Pf00350, Pf01031, Pf02212	13429	ENSMUSG00000026825	Dnm1	A2AN50; A2AN51; A2AN54; A2AN55; mmu:13429; P39053; Q3UNM1; Q5DTN7; Q61358; Q61359; Q61360; Q6PDM5; Q8JZZ4; Q9CSY7; Q9QXX1	MHC class II antigen presentation; Recycling pathway of L1; Clathrin-mediated endocytosis; Formation of annular gap junctions; Toll Like Receptor 4 (TLR4) Cascade	One-carbon metabolism and related pathways; Primary focal segmental glomerulosclerosis (FSGS); IL-3 signaling pathway; EGFR1 signaling pathway	10	9	2.641	1
187	High	Master Protein	Q8QZT1	Acetyl-CoA acetyltransferase, mitochondrial [OS=Mus musculus]	0	63.127	28	9	36	9	424	44.8	8.51	92.05	9	other metabolic processes;stress response;developmental processes;other biological processes	mitochondrion;ER/Golgi	other molecular function	Pf00108, Pf02803	110446	ENSMUSG00000032047	Acat1	mmu:110446; Q3TE92; Q8QZT1	Branched-chain amino acid catabolism; Synthesis of Ketone Bodies; Utilization of Ketone Bodies	Fatty acid beta-oxidation; Synthesis and degradation of ketone bodies; Tryptophan metabolism	6	0	2.639	1
188	High	Master Protein	Q8K0S5	Reticulon-4 receptor-like 1 [OS=Mus musculus]	0	15.883	12	5	13	5	445	49.8	8.65	11.73	5	cell organization and biogenesis;developmental processes;other biological processes	plasma membrane;other membranes;other cell component	signal transduction activity or receptor binding;other molecular function	Pf13855	237847	ENSMUSG00000045287	Rtn4rl1	mmu:237847; Q8K0S5			0	0	2.637	1
189	High	Master Protein	O70318	Band 4.1-like protein 2 [OS=Mus musculus]	0	18.231	6	6	9	5	988	109.9	5.43	6.52	6	cell cycle OR cell proliferation;cell organization and biogenesis;other biological processes	plasma membrane;other membranes;cytoskeleton;nucleus;other cell component	cytoskeletal activity;other molecular function	Pf00373, Pf04382, Pf05902, Pf08736, Pf09379, Pf09380	13822	ENSMUSG00000019978	Epb41l2	G3X9B8; mmu:13822; O70318	Neurexins and neuroligins	Splicing factor NOVA regulated synaptic proteins	2	0	2.635	1
190	High	Master Protein	Q9WV92	Band 4.1-like protein 3 [OS=Mus musculus]	0	52.35	15	11	28	8	929	103.3	5.31	53.67	11	cell organization and biogenesis;developmental processes;other biological processes	plasma membrane;other membranes;cytosol;cytoskeleton;other cell component	cytoskeletal activity;other molecular function	Pf00373, Pf04382, Pf05902, Pf08736, Pf09379, Pf09380	13823	ENSMUSG00000024044	Epb41l3	mmu:13823; Q69ZT8; Q9R102; Q9WV92	Neurexins and neuroligins	Splicing factor NOVA regulated synaptic proteins	2	2	2.635	1
191	High	Master Protein	P46460	Vesicle-fusing ATPase [OS=Mus musculus]	0	159.807	44	31	78	31	744	82.6	6.95	174.32	31	cell organization and biogenesis;transport;other biological processes	plasma membrane;other membranes;cytosol;ER/Golgi;other cell component	signal transduction activity or receptor binding;other molecular function	Pf00004, Pf02359, Pf02933, Pf17862	18195	ENSMUSG00000034187	Nsf	A2A646; mmu:18195; P46460; Q8BQ65; Q8C3R2; Q8CCT9; Q8CEF0; Q923C6	COPI-dependent Golgi-to-ER retrograde traffic; COPI-mediated anterograde transport; Retrograde transport at the Trans-Golgi-Network; Intra-Golgi traffic; COPII-mediated vesicle transport; Trafficking of GluR2-containing AMPA receptors		6	0	2.63	1
192	High	Master Protein	P05063	Fructose-bisphosphate aldolase C [OS=Mus musculus]	0	60.003	36	12	41	11	363	39.4	7.12	70.16	12	other metabolic processes;other biological processes	cytosol;other cell component	cytoskeletal activity;other molecular function	Pf00274	11676	ENSMUSG00000017390	Aldoc	mmu:11676; P05063; Q64011; Q8CA91; Q99K96; Q9DBA4; Q9JK32	Neutrophil degranulation; Gluconeogenesis; Glycolysis	Glycolysis and gluconeogenesis	4	0	2.627	1
193	High	Master Protein	P29533	Vascular cell adhesion protein 1 [OS=Mus musculus]	0	40.333	14	10	26	10	739	81.3	5.3	30.6	10	cell adhesion;other metabolic processes;stress response;developmental processes;signal transduction;other biological processes	non-structural extracellular;plasma membrane;other membranes;cytoskeleton;ER/Golgi;other cytoplasmic organelle;other cell component	signal transduction activity or receptor binding;other molecular function	Pf00047, Pf05790, Pf07679, Pf13927		ENSMUSG00000027962	Vcam1	P29533	Immunoregulatory interactions between a Lymphoid and a non-Lymphoid cell; Integrin cell surface interactions		2	0	2.624	1
194	High	Master Protein	P17742	Peptidyl-prolyl cis-trans isomerase A [OS=Mus musculus]	0	43.49	43	8	37	8	164	18	7.9	73.13	8	cell adhesion;cell organization and biogenesis;protein metabolism;other metabolic processes;stress response;developmental processes;other biological processes	non-structural extracellular;cytosol;nucleus;other cell component	signal transduction activity or receptor binding;other molecular function	Pf00160	268373	ENSMUSG00000071866	Ppia	mmu:268373; P17742; Q9CWJ5; Q9R137	Neutrophil degranulation		1	0	2.613	1
195	High	Master Protein	P68181	cAMP-dependent protein kinase catalytic subunit beta [OS=Mus musculus]	0	79.43	43	14	53	4	351	40.7	8.56	98.95	14	protein metabolism;other metabolic processes;developmental processes;signal transduction;other biological processes	plasma membrane;other membranes;cytosol;cytoskeleton;nucleus;other cell component	kinase activity;other molecular function	Pf00069	18749	ENSMUSG00000005034	Prkacb	mmu:18749; P05206; P68181; Q3TQH5; Q3UDD0; Q3UTH5	MAPK6/MAPK4 signaling; GLI3 is processed to GLI3R by the proteasome; CD209 (DC-SIGN) signaling; VEGFA-VEGFR2 Pathway; Factors involved in megakaryocyte development and platelet production; Rap1 signalling; RET signaling; DARPP-32 events; Glucagon-like Peptide-1 (GLP1) regulates insulin secretion; Vasopressin regulates renal water homeostasis via Aquaporins; PKA activation; PKA activation in gluca…	Chemokine signaling pathway; G protein signaling pathways; Myometrial relaxation and contraction pathways; Comprehensive IL-17A signaling; Calcium regulation in cardiac cells	22	9	2.602	1
196	High	Master Protein	P40124	Adenylyl cyclase-associated protein 1 [OS=Mus musculus]	0	67.069	32	13	50	12	474	51.5	7.52	81.23	13	cell organization and biogenesis;transport;signal transduction;other biological processes	non-structural extracellular;plasma membrane;other membranes;cytosol;cytoskeleton;other cell component	cytoskeletal activity;other molecular function	Pf01213, Pf08603	12331	ENSMUSG00000028656	Cap1	mmu:12331; P40124; Q8BPT7	Neutrophil degranulation	Insulin signaling	2	1	2.602	1
197	High	Master Protein	Q9QUI0	Transforming protein RhoA [OS=Mus musculus]	0	44.474	30	7	33	6	193	21.8	6.1	53	7	cell adhesion;cell cycle OR cell proliferation;cell organization and biogenesis;other metabolic processes;stress response;developmental processes;signal transduction;other biological processes	plasma membrane;other membranes;cytosol;cytoskeleton;nucleus;other cytoplasmic organelle;other cell component	cytoskeletal activity;other molecular function	Pf00071	11848	ENSMUSG00000007815	Rhoa	mmu:11848; O88336; Q9QUI0	Neutrophil degranulation; RHO GTPases Activate Formins; EPHB-mediated forward signaling; RHOA GTPase cycle; ERBB2 Regulates Cell Motility; Ovarian tumor domain proteases; G alpha (12/13) signalling events; RHOC GTPase cycle; GPVI-mediated activation cascade; PTK6 Regulates RHO GTPases, RAS GTPase and MAP kinases; RHO GTPases activate CIT; EPHA-mediated growth cone collapse; PI3K/AKT activation; V…	MicroRNAs in cardiomyocyte hypertrophy; Chemokine signaling pathway; G protein signaling pathways; Spinal cord injury; G13 signaling pathway; Wnt signaling in kidney disease; Wnt signaling pathway; Alpha 6 beta 4 integrin signaling pathway; Fibrin complement receptor 3 signaling pathway; Regulation of actin cytoskeleton; Comprehensive IL-17A signaling; Wnt signaling pathway; Wnt signaling pathway…	40	1	2.601	1
198	High	Master Protein	Q8JZZ7	Adhesion G protein-coupled receptor L2 [OS=Mus musculus]	0	27.523	5	7	17	7	1487	166.5	6.71	20.22	7	cell organization and biogenesis;developmental processes;signal transduction;other biological processes	plasma membrane;other membranes;other cell component	other molecular function	Pf00002, Pf01825, Pf02140, Pf02191, Pf02354, Pf02793, Pf16489		ENSMUSG00000028184	Adgrl2	E9Q6C7; Q8BM90; Q8JZZ7		GPCRs, non-odorant	1	0	2.593	1
199	High	Master Protein	P06802	Ectonucleotide pyrophosphatase/phosphodiesterase family member 1 [OS=Mus musculus]	0	25.089	7	5	9	5	906	103.1	6.6	14.5	5	cell-cell signaling;cell cycle OR cell proliferation;cell organization and biogenesis;protein metabolism;RNA metabolism OR transcription;other metabolic processes;stress response;transport;developmental processes;signal transduction;other biological processes	non-structural extracellular;plasma membrane;other membranes;other cell component	signal transduction activity or receptor binding;nucleic acid binding activity;other molecular function	Pf01033, Pf01223, Pf01663	18605		Enpp1	mmu:18605; P06802; Q542E9; Q924C4	Vitamin B2 (riboflavin) metabolism	Endochondral ossification; Insulin signaling	3	0	2.584	1
200	High	Master Protein	P48774	Glutathione S-transferase Mu 5 [OS=Mus musculus]	0	23.151	36	7	17	6	224	26.6	7.21	32.58	7	other metabolic processes;stress response;other biological processes	cytosol;cytoskeleton;other cell component	other molecular function	Pf00043, Pf02798	14866	ENSMUSG00000004032	Gstm5	mmu:14866; P48774; Q545W5	Glutathione conjugation	Metapathway biotransformation; Oxidative stress and redox pathway	3	1	2.584	1
201	High	Master Protein	P84091	AP-2 complex subunit mu [OS=Mus musculus]	0	104.146	51	20	88	20	435	49.6	9.54	161.22	20	cell organization and biogenesis;transport;other biological processes	plasma membrane;other membranes;other cell component	signal transduction activity or receptor binding;other molecular function	Pf00928, Pf01217	11773	ENSMUSG00000022841	Ap2m1	mmu:11773; P20172; P53679; P84091	Cargo recognition for clathrin-mediated endocytosis; VLDLR internalisation and degradation; MHC class II antigen presentation; Recycling pathway of L1; LDL clearance; Trafficking of GluR2-containing AMPA receptors; Retrograde neurotrophin signalling; Formation of annular gap junctions; WNT5A-dependent internalization of FZD4; WNT5A-dependent internalization of FZD2, FZD5 and ROR2		12	0	2.575	1
202	High	Master Protein	Q9DBG3	AP-2 complex subunit beta [OS=Mus musculus]	0	108.908	31	25	77	15	937	104.5	5.38	145.09	25	cell organization and biogenesis;transport;developmental processes;other biological processes	plasma membrane;other membranes;other cell component	other molecular function	Pf01602, Pf02883, Pf09066	71770	ENSMUSG00000035152	Ap2b1	mmu:71770; Q80XJ4; Q9DBG3	Cargo recognition for clathrin-mediated endocytosis; VLDLR internalisation and degradation; MHC class II antigen presentation; Recycling pathway of L1; LDL clearance; Trafficking of GluR2-containing AMPA receptors; Retrograde neurotrophin signalling; WNT5A-dependent internalization of FZD4; WNT5A-dependent internalization of FZD2, FZD5 and ROR2		10	7	2.567	1
203	High	Master Protein	Q3TXX4	Vesicular glutamate transporter 1 [OS=Mus musculus]	0	46.964	11	8	45	7	560	61.6	7.34	85.22	8	cell-cell signaling;cell organization and biogenesis;transport;signal transduction;other biological processes	plasma membrane;other membranes;ER/Golgi;other cell component	transporter activity	Pf07690	72961	ENSMUSG00000070570	Slc17a7	E9QMT8; mmu:72961; Q3TXX4	Glutamate Neurotransmitter Release Cycle; Organic anion transporters		2	1	2.564	1
204	High	Master Protein	P62962	Profilin-1 [OS=Mus musculus]	0	31.748	43	5	26	5	140	14.9	8.28	52.16	5	cell organization and biogenesis;developmental processes;other biological processes	non-structural extracellular;cytosol;cytoskeleton;nucleus;other cell component	signal transduction activity or receptor binding;cytoskeletal activity;other molecular function	Pf00235	18643	ENSMUSG00000018293	Pfn1	mmu:18643; P10924; P62962	RHO GTPases Activate Formins; PCP/CE pathway; Signaling by ROBO receptors	G13 signaling pathway; Regulation of actin cytoskeleton	5	0	2.558	1
205	High	Master Protein	Q8BMF4	Dihydrolipoyllysine-residue acetyltransferase component of pyruvate dehydrogenase complex, mitochondrial [OS=Mus musculus]	0	15.39	12	6	16	6	642	67.9	8.57	11.32	6	other metabolic processes	mitochondrion;other cell component	other molecular function	Pf00198, Pf00364, Pf02817	235339	ENSMUSG00000000168	Dlat	mmu:235339; Q8BMF4; Q8K2G8; Q8R339; Q91ZB1	Glyoxylate metabolism and glycine degradation; Regulation of pyruvate dehydrogenase (PDH) complex; Signaling by Retinoic Acid	Glycolysis and gluconeogenesis; TCA cycle	6	0	2.553	1
206	High	Master Protein	Q91V41	Ras-related protein Rab-14 [OS=Mus musculus]	0	52.917	59	10	37	8	215	23.9	6.21	87.29	10	cell organization and biogenesis;stress response;transport;signal transduction;other biological processes	plasma membrane;other membranes;cytosol;ER/Golgi;other cytoplasmic organelle;other cell component	cytoskeletal activity;other molecular function	Pf00071	68365	ENSMUSG00000026878	Rab14	mmu:68365; Q91V41	Neutrophil degranulation; Synthesis of PIPs at the plasma membrane; RAB GEFs exchange GTP for GDP on RABs; RAB geranylgeranylation	Focal adhesion: PI3K-Akt-mTOR signaling pathway	5	0	2.553	1
207	High	Master Protein	O35633	Vesicular inhibitory amino acid transporter [OS=Mus musculus]	0	36.177	17	8	28	8	525	57.3	6.64	26.16	8	transport;developmental processes	plasma membrane;other membranes;ER/Golgi;other cell component	transporter activity	Pf01490	22348	ENSMUSG00000037771	Slc32a1	mmu:22348; O35633	GABA synthesis, release, reuptake and degradation; Transport of inorganic cations/anions and amino acids/oligopeptides		2	0	2.549	1
208	High	Master Protein	Q00896	Alpha-1-antitrypsin 1-3 [OS=Mus musculus]	0	46.571	26	10	50	4	412	45.8	5.44	119.83	10	other biological processes	non-structural extracellular;ER/Golgi;other cell component	enzyme regulator activity;other molecular function	Pf00079	20702		Serpina1c	mmu:20702; P81105; Q00896; Q91V74; Q91WH5; Q91XC1	Neutrophil degranulation; Platelet degranulation ; Regulation of Insulin-like Growth Factor (IGF) transport and uptake by Insulin-like Growth Factor Binding Proteins (IGFBPs); Post-translational protein phosphorylation; COPII-mediated vesicle transport; Cargo concentration in the ER		6	0	2.547	1
209	High	Master Protein	P62814	V-type proton ATPase subunit B, brain isoform [OS=Mus musculus]	0	76.626	36	15	51	15	511	56.5	5.81	101.68	15	cell organization and biogenesis;other metabolic processes;transport;other biological processes	plasma membrane;other membranes;cytosol;ER/Golgi;other cytoplasmic organelle;other cell component	transporter activity;other molecular function	Pf00006, Pf02874	11966	ENSMUSG00000006273	Atp6v1b2	mmu:11966; O09045; P50517; P62814; Q3TG74; Q3TL62; Q3TVK6; Q3TWR0; Q3U791; Q3U7C8; Q3U9Z0; Q3UAW7	Insulin receptor recycling; Amino acids regulate mTORC1; ROS and RNS production in phagocytes; Transferrin endocytosis and recycling; Ion channel transport		5	0	2.547	1
210	High	Master Protein	Q9Z0X1	Apoptosis-inducing factor 1, mitochondrial [OS=Mus musculus]	0	25.725	10	5	13	5	612	66.7	9.17	16.05	5	cell organization and biogenesis;other metabolic processes;stress response;transport;developmental processes;signal transduction;other biological processes	other membranes;cytosol;mitochondrion;nucleus;other cell component	nucleic acid binding activity;other molecular function	Pf07992, Pf14721	26926	ENSMUSG00000036932	Aifm1	mmu:26926; Q1L6K5; Q9Z0X1		Apoptosis modulation by HSP70	1	0	2.545	1
211	High	Master Protein	O88342	WD repeat-containing protein 1 [OS=Mus musculus]	0	64.524	30	11	29	11	606	66.4	6.6	74.49	11	cell organization and biogenesis;other biological processes	plasma membrane;other membranes;cytoskeleton;other cell component	cytoskeletal activity	Pf00400	22388	ENSMUSG00000005103	Wdr1	mmu:22388; O88342	Platelet degranulation	Hypertrophy model	2	0	2.539	1
212	High	Master Protein	Q9WUM5	Succinate--CoA ligase [ADP/GDP-forming] subunit alpha, mitochondrial [OS=Mus musculus]	0	40.329	26	7	33	7	346	36.1	9.39	58.13	7	other metabolic processes	mitochondrion;other cell component	other molecular function	Pf00549, Pf02629	56451	ENSMUSG00000052738	Suclg1	mmu:56451; Q8C2C3; Q9DBA3; Q9DCI8; Q9WUM5	Citric acid cycle (TCA cycle)	TCA cycle	2	0	2.537	1
213	High	Master Protein	P63005	Platelet-activating factor acetylhydrolase IB subunit beta [OS=Mus musculus]	0	33.259	20	8	19	8	410	46.6	7.37	28.57	8	cell-cell signaling;cell cycle OR cell proliferation;cell organization and biogenesis;other metabolic processes;stress response;transport;developmental processes;signal transduction;other biological processes	other membranes;cytosol;cytoskeleton;nucleus;other cell component	cytoskeletal activity;other molecular function	Pf00400, Pf08513	18472	ENSMUSG00000020745	Pafah1b1	mmu:18472; O35592; P43035; P63005; P81692; Q9R2A6	Separation of Sister Chromatids; Regulation of PLK1 Activity at G2/M Transition; Anchoring of the basal body to the plasma membrane; Amplification of signal from unattached kinetochores via a MAD2 inhibitory signal; Resolution of Sister Chromatid Cohesion; Loss of Nlp from mitotic centrosomes; Recruitment of mitotic centrosome proteins and complexes; Recruitment of NuMA to mitotic centrosomes; RH…	Wnt signaling pathway; Wnt signaling pathway and pluripotency	16	0	2.535	1
214	High	Master Protein	P50396	Rab GDP dissociation inhibitor alpha [OS=Mus musculus]	0	143.486	58	22	68	17	447	50.5	5.08	181.77	22	cell organization and biogenesis;transport;signal transduction;other biological processes	cytosol;ER/Golgi;other cell component	enzyme regulator activity;other molecular function	Pf00996	14567	ENSMUSG00000015291	Gdi1	A2AMA8; mmu:14567; P50396; Q3TBI9; Q8VHM3; Q91Y71; Q91Z41; Q96CX5	RAB GEFs exchange GTP for GDP on RABs		1	3	2.531	1
215	High	Master Protein	P70202	Latexin [OS=Mus musculus]	0	21.212	20	4	11	4	222	25.5	5.74	30.38	4	stress response;other biological processes	non-structural extracellular;other cell component	enzyme regulator activity;other molecular function	Pf06907	17035	ENSMUSG00000047557	Lxn	mmu:17035; P70202; Q3UDQ0; Q8CCS8			0	0	2.528	1
216	High	Master Protein	P52480	Pyruvate kinase PKM [OS=Mus musculus]	0	174.731	50	23	98	23	531	57.8	7.47	272.89	23	cell organization and biogenesis;RNA metabolism OR transcription;other metabolic processes;developmental processes;other biological processes	cytosol;ER/Golgi;nucleus;other cell component	nucleic acid binding activity;kinase activity;other molecular function	Pf00224, Pf02887	18746	ENSMUSG00000032294	Pkm	mmu:18746; P52480; Q3TBV8; Q3TBW5; Q3TC59; Q3U1X3; Q3U5P6; Q4VC20; Q64484; Q91YI8; Q9CWB1	Neutrophil degranulation; Glycolysis	Glycolysis and gluconeogenesis; Purine metabolism	4	0	2.52	1
217	High	Master Protein	Q9CQW1	Synaptobrevin homolog YKT6 [OS=Mus musculus]	0	12.436	30	5	8	5	198	22.3	6.35	7.04	5	cell organization and biogenesis;transport	plasma membrane;other membranes;cytosol;mitochondrion;ER/Golgi;other cytoplasmic organelle;other cell component	other molecular function	Pf00957, Pf13774	56418	ENSMUSG00000002741	Ykt6	mmu:56418; O88595; Q9CQW1	COPI-mediated anterograde transport; Intra-Golgi traffic; RHOA GTPase cycle; CDC42 GTPase cycle; RAC1 GTPase cycle; RHOG GTPase cycle; RAC3 GTPase cycle; COPII-mediated vesicle transport		8	0	2.512	1
218	High	Master Protein	P14211	Calreticulin [OS=Mus musculus]	0	25.494	14	6	20	6	416	48	4.49	24.03	6	cell organization and biogenesis;protein metabolism;other metabolic processes;stress response;transport;developmental processes;other biological processes	non-structural extracellular;extracellular matrix;plasma membrane;other membranes;cytosol;ER/Golgi;nucleus;other cytoplasmic organelle;other cell component	signal transduction activity or receptor binding;nucleic acid binding activity;other molecular function	Pf00262	12317	ENSMUSG00000003814	Calr	mmu:12317; P14211; Q3TVD2	ER-Phagosome pathway; Antigen Presentation: Folding, assembly and peptide loading of class I MHC; Scavenging by Class A Receptors; Calnexin/calreticulin cycle	Calcium regulation in cardiac cells	5	0	2.494	1
219	High	Master Protein	Q921I1	Serotransferrin [OS=Mus musculus]	0	32.644	14	8	18	8	697	76.7	7.18	30.73	8	cell organization and biogenesis;stress response;transport;signal transduction;other biological processes	non-structural extracellular;extracellular matrix;plasma membrane;other membranes;other cytoplasmic organelle;other cell component	signal transduction activity or receptor binding;other molecular function	Pf00405	22041	ENSMUSG00000032554	Tf	mmu:22041; O35421; Q3UBW7; Q58E69; Q61803; Q62357; Q62358; Q62359; Q63915; Q64515; Q8VII5; Q921I1; Q922C0	Regulation of Insulin-like Growth Factor (IGF) transport and uptake by Insulin-like Growth Factor Binding Proteins (IGFBPs); Post-translational protein phosphorylation; Cargo recognition for clathrin-mediated endocytosis; Platelet degranulation ; Transferrin endocytosis and recycling	Iron homeostasis	8	0	2.494	1
220	High	Master Protein	P62743	AP-2 complex subunit sigma [OS=Mus musculus]	0	17.23	29	4	10	4	142	17	6.18	15.07	4	transport	plasma membrane;other membranes;other cell component	other molecular function	Pf01217	232910	ENSMUSG00000008036	Ap2s1	mmu:232910; P62743; P70626; P97626; Q00380	Cargo recognition for clathrin-mediated endocytosis; VLDLR internalisation and degradation; MHC class II antigen presentation; Recycling pathway of L1; LDL clearance; Trafficking of GluR2-containing AMPA receptors; Retrograde neurotrophin signalling; WNT5A-dependent internalization of FZD4; WNT5A-dependent internalization of FZD2, FZD5 and ROR2		10	0	2.485	1
[truncated: 215 more rows]

## Sheet: NAPS-BmTyr_b3
No.	Protein FDR Confidence: Combined	Master	Accession	Description	Exp. q-value: Combined	Sum PEP Score	Coverage [%]	# Peptides	# PSMs	# Unique Peptides	# AAs	MW [kDa]	calc. pI	Score Sequest HT: Sequest HT	# Peptides (by Search Engine): Sequest HT	Biological Process	Cellular Component	Molecular Function	Pfam IDs	Entrez Gene ID	Ensembl Gene ID	Gene Symbol	Gene ID	WikiPathways	Reactome Pathways	# Protein Pathway Groups	# Razor Peptides	Abundance Ratio: (mSPI) / (wt)	# Protein Groups
[truncated: 320 more rows]

[truncated: 1 more sheets: hit proteins]
