# Supplementary material for: Tyrosinase-based proximity labeling in living cells and in vivo
Source: Research Square preprint supplement (doi:10.21203/rs.3.rs-3354015/v1), 2023-09-20
Supplement: Supplementary file 2 [file ac55248ffb50cbae7b21b4f0.xlsx]

## Sheet: peptides_labeled BSA
No.	Confidence	Sequence	Modifications	# Protein Groups	# Proteins	# PSMs	Master Protein Accessions	# Missed Cleavages	Theo. MH+ [Da]	Confidence (by Search Engine)	XCorr (by Search Engine)
1	High	DDSPDLPKLKPDPNTLCDEFK	1×Carbamidomethyl [C17]; 1×Dc-Q [K8]	1	1	1	P02769	1	2907.34	High	2.9
2	High	KQTALVELLK	1×Dc-Cat [K1]	1	1	3	P02769	1	1607.9	High	2.48
3	High	KVPQVSTPTLVEVSR	1×Dc-Q [K1]	1	1	10	P02769	1	2103.11	High	3.27
4	High	LAKEYEATLEECCAK	2×Carbamidomethyl [C12; C13]; 1×Dc-Q [K3]	1	1	40	P02769	1	2278	High	3.95
5	High	LFTFHADICTLPDTEK	1×Carbamidomethyl [C9]; 1×Dc-Cat [H5]	1	1	3	P02769	0	2373.11	High	4
6	High	SLHTLFGDELCK	1×Carbamidomethyl [C11]; 1×Dc-Cat [H3]	1	1	1	P02769	0	1884.88	High	1.88
7	High	SLHTLFGDELCKVASLR	1×Carbamidomethyl [C11]; 1×Dc-Cat [K12]	1	1	1	P02769	1	2411.21	High	1.48
