# Supplementary material for: Tyrosinase-based proximity labeling in living cells and in vivo
Source: Research Square preprint supplement (doi:10.21203/rs.3.rs-3354015/v1), 2023-09-20
Supplement: Supplementary file 3 [file c4357f841e2bee3a31450a28.xlsx]

## Sheet: FITM-BmTyr_b1
No.	Protein FDR Confidence: Combined	Master	Accession	Description	Exp. q-value: Combined	Sum PEP Score	Coverage [%]	# Peptides	# PSMs	# Unique Peptides	# AAs	MW [kDa]	calc. pI	Score Sequest HT: Sequest HT	# Peptides (by Search Engine): Sequest HT	Biological Process	Cellular Component	Molecular Function	Pfam IDs	Entrez Gene ID	Ensembl Gene ID	Gene Symbol	Gene ID	Reactome Pathways	WikiPathways	# Protein Pathway Groups	# Razor Peptides	Abundance Ratio: (FITM) / (wt)	# Protein Groups
1	High	Master Protein	E9Q557	Desmoplakin [OS=Mus musculus]	0	9.074	2	5	8	5	2883	332.7	6.8	1.7	5	cell adhesion;cell organization and biogenesis;protein metabolism;other metabolic processes;stress response;developmental processes;other biological processes	plasma membrane;other membranes;cytoskeleton;other cell component	other molecular function	Pf00681, Pf17902, Pf18373	109620	ENSMUSG00000054889	Dsp	E9Q557; mmu:109620	Neutrophil degranulation; Formation of the cornified envelope; RND3 GTPase cycle; RND1 GTPase cycle; Apoptotic cleavage of cell adhesion proteins	Lung fibrosis; Alpha 6 beta 4 integrin signaling pathway	8	0	1000	1
2	High	Master Protein	Q02257	Junction plakoglobin [OS=Mus musculus]	0	23.476	11	6	10	6	745	81.7	6.14	16.07	6	cell adhesion;cell-cell signaling;cell organization and biogenesis;RNA metabolism OR transcription;signal transduction;other biological processes	plasma membrane;other membranes;cytosol;cytoskeleton;nucleus;other cell component	other molecular function	Pf00514	16480	ENSMUSG00000001552	Jup	mmu:16480; Q02257; Q8CGD3	Neutrophil degranulation; RHOA GTPase cycle; RHOB GTPase cycle; Formation of the cornified envelope; RHOQ GTPase cycle; RHOC GTPase cycle; RHOH GTPase cycle; Adherens junctions interactions; Regulation of CDH11 function; VEGFR2 mediated vascular permeability	Wnt signaling pathway	12	0	14.844	1
3	High	Master Protein	P35436	Glutamate receptor ionotropic, NMDA 2A [OS=Mus musculus]	0	17.869	6	7	10	7	1464	165.3	7.01	11.57	7	cell-cell signaling;cell organization and biogenesis;protein metabolism;other metabolic processes;stress response;transport;developmental processes;signal transduction;other biological processes	plasma membrane;other membranes;ER/Golgi;other cell component	signal transduction activity or receptor binding;transporter activity;other molecular function	Pf00060, Pf01094, Pf10565, Pf10613	14811	ENSMUSG00000059003	Grin2a	mmu:14811; P35436	Synaptic adhesion-like molecules; Assembly and cell surface presentation of NMDA receptors; Unblocking of NMDA receptors, glutamate binding and activation	Alzheimer's disease	4	0	3.24	1
4	High	Master Protein	Q9Z2W9	Glutamate receptor 3 [OS=Mus musculus]	0	50.974	14	10	42	5	888	100.5	8.38	87.05	10	cell-cell signaling;transport;signal transduction;other biological processes	non-structural extracellular;plasma membrane;other membranes;other cell component	transporter activity;other molecular function	Pf00060, Pf01094, Pf10613	53623	ENSMUSG00000001986	Gria3	A2VDF4; mmu:53623; Q5DTJ0; Q9Z2W9	Trafficking of GluR2-containing AMPA receptors; Unblocking of NMDA receptors, glutamate binding and activation; Activation of AMPA receptors; Synaptic adhesion-like molecules		5	0	2.974	1
5	High	Master Protein	P97772	Metabotropic glutamate receptor 1 [OS=Mus musculus]	0	41.978	10	12	32	12	1199	133.1	6.86	50.21	12	cell-cell signaling;transport;signal transduction;other biological processes	plasma membrane;other membranes;nucleus;other cell component	other molecular function	Pf00003, Pf01094, Pf07562, Pf10606	14816	ENSMUSG00000019828	Grm1	mmu:14816; P97772; Q6AXG4; Q9EPV6	G alpha (q) signalling events; Neurexins and neuroligins; Class C/3 (Metabotropic glutamate/pheromone receptors)	GPCRs, non-odorant ; Serotonin and anxiety; GPCRs, class C metabotropic glutamate, pheromone; GPCRs, other	7	0	2.877	1
6	High	Master Protein	P22723	Gamma-aminobutyric acid receptor subunit gamma-2 [OS=Mus musculus]	0	12.269	9	4	10	4	474	55.1	8.66	4.96	4	cell-cell signaling;cell organization and biogenesis;transport;developmental processes;signal transduction;other biological processes	plasma membrane;other membranes;other cell component	transporter activity;other molecular function	Pf02931, Pf02932	14406	ENSMUSG00000020436	Gabrg2	mmu:14406; P22723; Q91V50; Q91VA8	GABA receptor activation	Splicing factor NOVA regulated synaptic proteins	2	0	2.791	1
7	High	Master Protein	Q80T41	Gamma-aminobutyric acid type B receptor subunit 2 [OS=Mus musculus]	0	28.246	10	10	28	10	940	105.6	8.72	20.42	10	cell-cell signaling;signal transduction	plasma membrane;other membranes;other cell component	other molecular function	Pf00003, Pf01094, Pf18455	242425	ENSMUSG00000039809	Gabbr2	A2AL05; mmu:242425; Q80T41	G alpha (i) signalling events; Activation of G protein gated Potassium channels; Inhibition of voltage gated Ca2+ channels via Gbeta/gamma subunits; Class C/3 (Metabotropic glutamate/pheromone receptors); GABA B receptor activation	GPCRs, non-odorant ; Splicing factor NOVA regulated synaptic proteins; GPCRs, class C metabotropic glutamate, pheromone	8	0	2.764	1
8	High	Master Protein	P63017	Heat shock cognate 71 kDa protein [OS=Mus musculus]	0	16.19	10	5	5	5	646	70.8	5.52	4.91	5	cell cycle OR cell proliferation;cell organization and biogenesis;protein metabolism;RNA metabolism OR transcription;other metabolic processes;stress response;transport;developmental processes;other biological processes	non-structural extracellular;plasma membrane;other membranes;cytosol;cytoskeleton;ER/Golgi;nucleus;other cytoplasmic organelle;other cell component	signal transduction activity or receptor binding;nucleic acid binding activity;other molecular function	Pf00012	15481	ENSMUSG00000015656	Hspa8	mmu:15481; P08109; P12225; P63017; Q3U6R0; Q3U764; Q3U7D7; Q3U7E2; Q3U9B4; Q3U9G0; Q3UGM0; Q5FWJ6; Q62373; Q62374; Q62375; Q6NZD0	HSP90 chaperone cycle for steroid hormone receptors (SHR) in the presence of ligand; mRNA Splicing - Major Pathway; Neutrophil degranulation; Regulation of HSF1-mediated heat shock response; Attenuation phase; Clathrin-mediated endocytosis; Golgi Associated Vesicle Biogenesis; Lysosome Vesicle Biogenesis; GABA synthesis, release, reuptake and degradation; AUF1 (hnRNP D0) binds and destabilizes mR…	Mapk signaling pathway; Exercise-induced circadian regulation	14	0	2.568	1
9	High	Master Protein	P23819	Glutamate receptor 2 [OS=Mus musculus]	0	31.338	10	8	38	5	883	98.6	7.39	48.24	8	cell-cell signaling;cell organization and biogenesis;transport;signal transduction;other biological processes	non-structural extracellular;plasma membrane;other membranes;ER/Golgi;other cell component	signal transduction activity or receptor binding;transporter activity;cytoskeletal activity;other molecular function	Pf00060, Pf01094, Pf10613			Gria2	P23819; Q61604; Q61605; Q8BG69; Q8BXU3; Q9D6D3	Trafficking of GluR2-containing AMPA receptors; Unblocking of NMDA receptors, glutamate binding and activation; Activation of AMPA receptors		3	0	2.346	1
10	High	Master Protein	Q9CPW0	Contactin-associated protein-like 2 [OS=Mus musculus]	0	127.128	30	26	90	26	1332	148.1	6.77	181.88	26	cell adhesion;cell-cell signaling;cell cycle OR cell proliferation;cell organization and biogenesis;other metabolic processes;stress response;developmental processes;signal transduction;other biological processes	plasma membrane;other membranes;ER/Golgi;other cytoplasmic organelle;other cell component	other molecular function	Pf00754, Pf02210	66797	ENSMUSG00000039419	Cntnap2	mmu:66797; Q6P2K4; Q6ZQ31; Q9CPW0			0	0	2.345	1
11	High	Master Protein	P62812	Gamma-aminobutyric acid receptor subunit alpha-1 [OS=Mus musculus]	0	11.92	12	6	12	6	455	51.7	9.31	5.88	6	cell-cell signaling;cell organization and biogenesis;transport;developmental processes;signal transduction;other biological processes	plasma membrane;other membranes;other cell component	transporter activity;other molecular function	Pf02931, Pf02932	14394	ENSMUSG00000010803	Gabra1	mmu:14394; P18504; P62812	GABA receptor activation	Serotonin and anxiety	2	0	2.337	1
12	High	Master Protein	P68040	Receptor of activated protein C kinase 1 [OS=Mus musculus]	0	22.761	23	6	14	6	317	35.1	7.69	18.52	6	cell cycle OR cell proliferation;protein metabolism;other metabolic processes;developmental processes;signal transduction;other biological processes	plasma membrane;cytosol;mitochondrion;translational apparatus;nucleus;other cell component	signal transduction activity or receptor binding;enzyme regulator activity;translation activity;other molecular function	Pf00400	14694	ENSMUSG00000020372	Rack1	mmu:14694; P25388; P68040; P99049; Q3THP0; Q3THY7; Q3TKQ0; Q3TW88; Q5NCC5; Q5NCC6; Q9CSQ0; Q9ERM6	Regulation of TNFR1 signaling; TNFR1-induced NF-kappa-B signaling pathway; TNFR1-mediated ceramide production	IL-3 signaling pathway; IL-2 signaling pathway	5	0	2.318	1
13	High	Master Protein	Q9JHG0	Cerebellin-3 [OS=Mus musculus]	0	17.805	27	6	31	6	197	21.1	6.38	49.13	6	cell organization and biogenesis	non-structural extracellular;ER/Golgi;other cell component		Pf00386	56410	ENSMUSG00000040380	Cbln3	mmu:56410; Q9JHG0			0	0	2.306	1
14	High	Master Protein	Q9Z1X4	Interleukin enhancer-binding factor 3 [OS=Mus musculus]	0	95.612	24	21	91	21	898	96	8.76	139.62	21	protein metabolism;other metabolic processes;stress response;other biological processes	mitochondrion;nucleus;other cell component	nucleic acid binding activity;other molecular function	Pf00035, Pf07528	16201	ENSMUSG00000032178	Ilf3	mmu:16201; Q80VD5; Q812A1; Q8BP80; Q8C2H8; Q8K588; Q9Z1X4	Regulation of CDH11 gene transcription	mRNA processing	2	0	2.282	1
15	High	Master Protein	Q9D023	Mitochondrial pyruvate carrier 2 [OS=Mus musculus]	0	13.608	25	4	10	4	127	14.3	10.61	4.55	4	other metabolic processes;transport;other biological processes	other membranes;mitochondrion	transporter activity;other molecular function	Pf03650	70456	ENSMUSG00000026568	Mpc2	mmu:70456; Q3UA44; Q9D023		Glycolysis and gluconeogenesis	1	0	2.243	1
16	High	Master Protein	O88507	Ciliary neurotrophic factor receptor subunit alpha [OS=Mus musculus]	0	60.163	31	8	41	8	372	40.8	6.83	77.97	8	signal transduction;other biological processes	non-structural extracellular;plasma membrane;other membranes	signal transduction activity or receptor binding;other molecular function	Pf00041	12804	ENSMUSG00000028444	Cntfr	mmu:12804; O88507; Q80T01	IL-6-type cytokine receptor ligand interactions	Delta-Notch signaling pathway; Adipogenesis genes	3	0	2.234	1
17	High	Master Protein	Q9CR62	Mitochondrial 2-oxoglutarate/malate carrier protein [OS=Mus musculus]	0	6.752	12	4	6	4	314	34.1	9.94	0	4	other metabolic processes;transport	other membranes;mitochondrion	transporter activity	Pf00153	67863	ENSMUSG00000014606	Slc25a11	mmu:67863; Q9CR62	Gluconeogenesis		1	0	2.227	1
18	High	Master Protein	P70232	Neural cell adhesion molecule L1-like protein [OS=Mus musculus]	0	14.33	6	6	15	6	1209	135	5.57	16.04	6	cell adhesion;cell organization and biogenesis;stress response;developmental processes;other biological processes	non-structural extracellular;plasma membrane;other membranes;other cell component	other molecular function	Pf00041, Pf07679, Pf13882, Pf13927	12661	ENSMUSG00000030077	Chl1	A2RRK1; mmu:12661; P70232; Q8BS24; Q8C6W0; Q8C823; Q8VBY7		Splicing factor NOVA regulated synaptic proteins	1	0	2.223	1
19	High	Master Protein	Q9JIS5	Synaptic vesicle glycoprotein 2A [OS=Mus musculus]	0	11.203	6	4	12	4	742	82.6	5.57	10.13	4	cell-cell signaling;cell organization and biogenesis;transport;other biological processes	other membranes;ER/Golgi;other cell component	transporter activity;other molecular function	Pf00083, Pf07690	64051	ENSMUSG00000038486	Sv2a	mmu:64051; Q80TT0; Q8R0R5; Q9JIS5			0	0	2.221	1
20	High	Master Protein	Q68EF4	Metabotropic glutamate receptor 4 [OS=Mus musculus]	0	18.002	7	5	12	4	912	101.8	8.82	16.51	5	cell-cell signaling;signal transduction;other biological processes	plasma membrane;other membranes;other cell component	other molecular function	Pf00003, Pf01094, Pf07562	268934		Grm4	mmu:268934; Q68EF4; Q80UC2	G alpha (i) signalling events; Class C/3 (Metabotropic glutamate/pheromone receptors)	GPCRs, class C metabotropic glutamate, pheromone	3	1	2.167	1
21	High	Master Protein	P63080	Gamma-aminobutyric acid receptor subunit beta-3 [OS=Mus musculus]	0	44.833	23	9	31	4	473	54.1	9.1	68.82	9	cell-cell signaling;cell organization and biogenesis;transport;developmental processes;signal transduction;other biological processes	plasma membrane;other membranes;other cell component	transporter activity;other molecular function	Pf02931, Pf02932	14402	ENSMUSG00000033676	Gabrb3	mmu:14402; P15433; P63080; Q3UHR3	GABA receptor activation		1	5	2.166	1
22	High	Master Protein	Q6GQU6	Leucine-rich repeat and immunoglobulin-like domain-containing nogo receptor-interacting protein 3 [OS=Mus musculus]	0	50.725	24	11	35	11	589	64.6	8.31	63.91	11		non-structural extracellular;extracellular matrix;other membranes		Pf07679, Pf13855	237403	ENSMUSG00000051067	Lingo3	E9QK50; mmu:237403; Q6GQU6			0	0	2.159	1
23	High	Master Protein	P62631	Elongation factor 1-alpha 2 [OS=Mus musculus]	0	34.028	20	9	29	4	463	50.4	9.03	54.66	9	protein metabolism;other metabolic processes;other biological processes	nucleus;other cell component	nucleic acid binding activity;other molecular function	Pf00009, Pf03143, Pf03144	13628	ENSMUSG00000016349	Eef1a2	mmu:13628; P27706; P62631		Translation factors	1	5	2.142	1
24	High	Master Protein	P05532	Mast/stem cell growth factor receptor Kit [OS=Mus musculus]	0	9.275	5	5	12	5	979	109.3	7.21	0	5	cell adhesion;cell cycle OR cell proliferation;cell organization and biogenesis;protein metabolism;other metabolic processes;stress response;transport;developmental processes;signal transduction;other biological processes	non-structural extracellular;plasma membrane;other membranes;nucleus;other cell component	kinase activity;other molecular function	Pf00047, Pf07714	16590	ENSMUSG00000005672	Kit	mmu:16590; P05532; Q61415; Q61416; Q61417; Q6LEE9; Q6QJB7; Q6QJB8; Q7TS86; Q8C8K9	RAF/MAP kinase cascade; PIP3 activates AKT signaling; PI5P, PP2A and IER3 Regulate PI3K/AKT Signaling; Regulation of KIT signaling	Focal adhesion: PI3K-Akt-mTOR signaling pathway; Kit receptor signaling pathway	7	0	2.142	1
25	High	Master Protein	Q61625	Glutamate receptor ionotropic, delta-2 [OS=Mus musculus]	0	151.248	32	27	124	27	1007	113	6.1	270.17	27	cell adhesion;cell-cell signaling;cell organization and biogenesis;transport;developmental processes;signal transduction;other biological processes	plasma membrane;other membranes;other cell component	transporter activity;other molecular function	Pf00060, Pf01094, Pf10613	14804	ENSMUSG00000071424	Grid2	A4QPG1; mmu:14804; Q61625			0	0	2.138	1
26	High	Master Protein	Q9JIA1	Leucine-rich glioma-inactivated protein 1 [OS=Mus musculus]	0	16.824	9	5	18	5	557	63.6	8.02	15.42	5	cell organization and biogenesis;developmental processes;other biological processes	non-structural extracellular;ER/Golgi;other cell component	signal transduction activity or receptor binding	Pf03736, Pf13855	56839	ENSMUSG00000067242	Lgi1	A0A0G2JFT0; mmu:56839; Q9JIA1	LGI-ADAM interactions		1	0	2.124	1
27	High	Master Protein	Q8CJH3	Plexin-B1 [OS=Mus musculus]	0	28.624	4	6	11	6	2119	231.2	5.55	19.07	6	cell organization and biogenesis;developmental processes;signal transduction;other biological processes	plasma membrane;other membranes;other cell component	other molecular function	Pf01403, Pf01437, Pf01833, Pf08337, Pf17960, Pf18020, Pf20170	235611	ENSMUSG00000053646	Plxnb1	E9QKS4; mmu:235611; Q6ZQC3; Q80ZZ1; Q8CJH3	G alpha (12/13) signalling events; RHOD GTPase cycle; Sema4D mediated inhibition of cell attachment and migration; Sema4D induced cell migration and growth-cone collapse		4	0	2.115	1
28	High	Master Protein	P08249	Malate dehydrogenase, mitochondrial [OS=Mus musculus]	0	11.108	12	4	5	4	338	35.6	8.68	1.77	4	other metabolic processes	other membranes;mitochondrion;other cell component	other molecular function	Pf00056, Pf02866	17448	ENSMUSG00000019179	Mdh2	mmu:17448; P08249; Q0QF44; Q8CF79; Q8R1P0	Gluconeogenesis; Citric acid cycle (TCA cycle)	Glycolysis and gluconeogenesis; TCA cycle	4	0	2.109	1
29	High	Master Protein	P23818	Glutamate receptor 1 [OS=Mus musculus]	0	34.864	11	10	42	7	907	101.5	7.69	63.48	10	cell-cell signaling;cell organization and biogenesis;transport;developmental processes;signal transduction;other biological processes	non-structural extracellular;plasma membrane;other membranes;cytosol;ER/Golgi;other cytoplasmic organelle;other cell component	signal transduction activity or receptor binding;transporter activity;cytoskeletal activity;other molecular function	Pf00060, Pf01094, Pf10613	14799	ENSMUSG00000020524	Gria1	mmu:14799; P23818	Synaptic adhesion-like molecules; COPII-mediated vesicle transport; Cargo concentration in the ER; Trafficking of GluR2-containing AMPA receptors; Unblocking of NMDA receptors, glutamate binding and activation; Activation of AMPA receptors		7	2	2.106	1
30	High	Master Protein	Q8VDM6	Heterogeneous nuclear ribonucleoprotein U-like protein 1 [OS=Mus musculus]	0	11.556	4	4	12	4	859	95.9	6.58	4.56	4		nucleus;other cell component	nucleic acid binding activity;other molecular function	Pf00622, Pf02037, Pf13671	232989	ENSMUSG00000040725	Hnrnpul1	mmu:232989; Q3U201; Q3UPB0; Q6AZA7; Q8BY45; Q8K365; Q8VDM6			0	0	2.094	1
31	High	Master Protein	Q60841	Reelin [OS=Mus musculus]	0	59.667	5	15	35	15	3461	387.2	5.73	33.52	15	cell adhesion;cell organization and biogenesis;protein metabolism;other metabolic processes;stress response;developmental processes;signal transduction;other biological processes	non-structural extracellular;extracellular matrix;plasma membrane;other membranes;other cell component	signal transduction activity or receptor binding;other molecular function	Pf02014, Pf18720	19699	ENSMUSG00000042453	Reln	E9PZ78; mmu:19699; Q60841; Q9CUA6	Reelin signalling pathway	Focal adhesion: PI3K-Akt-mTOR signaling pathway; Focal adhesion	3	0	2.083	1
32	High	Master Protein	P06802	Ectonucleotide pyrophosphatase/phosphodiesterase family member 1 [OS=Mus musculus]	0	26.704	10	9	15	9	906	103.1	6.6	11.97	9	cell-cell signaling;cell cycle OR cell proliferation;cell organization and biogenesis;protein metabolism;RNA metabolism OR transcription;other metabolic processes;stress response;transport;developmental processes;signal transduction;other biological processes	non-structural extracellular;plasma membrane;other membranes;other cell component	signal transduction activity or receptor binding;nucleic acid binding activity;other molecular function	Pf01033, Pf01223, Pf01663	18605		Enpp1	mmu:18605; P06802; Q542E9; Q924C4	Vitamin B2 (riboflavin) metabolism	Endochondral ossification; Insulin signaling	3	0	2.076	1
33	High	Master Protein	Q9CS84	Neurexin-1 [OS=Mus musculus]	0	133.074	23	28	97	23	1514	166.1	6.09	170.18	28	cell adhesion;cell-cell signaling;cell organization and biogenesis;transport;developmental processes;signal transduction;other biological processes	plasma membrane;other membranes;ER/Golgi;nucleus;other cell component	signal transduction activity or receptor binding;other molecular function	Pf00008, Pf02210	18189	ENSMUSG00000024109	Nrxn1	G3UWZ9; O88722; Q80Y87; Q8CHE6; Q9CS84	Neurexins and neuroligins		1	5	2.071	1
34	High	Master Protein	P51881	ADP/ATP translocase 2 [OS=Mus musculus]	0	56.452	41	14	81	7	298	32.9	9.73	126.37	14	cell cycle OR cell proliferation;cell organization and biogenesis;other metabolic processes;transport;other biological processes	other membranes;cytoskeleton;mitochondrion	transporter activity;other molecular function	Pf00153	11740	ENSMUSG00000016319	Slc25a5	mmu:11740; P51881; Q61311	Transport of nucleosides and free purine and pyrimidine bases across the plasma membrane	Electron transport chain	2	0	2.063	1
35	High	Master Protein	Q9R171	Cerebellin-1 [OS=Mus musculus]	0	36.234	42	8	44	7	193	21.1	7.28	69.53	8	cell adhesion;cell organization and biogenesis;transport;developmental processes;other biological processes	non-structural extracellular;plasma membrane;other membranes;other cell component	other molecular function	Pf00386	12404	ENSMUSG00000031654	Cbln1	mmu:12404; P28655; Q9QVT5; Q9R171			0	1	2.036	1
36	High	Master Protein	P84091	AP-2 complex subunit mu [OS=Mus musculus]	0	29.038	23	11	29	11	435	49.6	9.54	30.74	11	cell organization and biogenesis;transport;other biological processes	plasma membrane;other membranes;other cell component	signal transduction activity or receptor binding;other molecular function	Pf00928, Pf01217	11773	ENSMUSG00000022841	Ap2m1	mmu:11773; P20172; P53679; P84091	Recycling pathway of L1; MHC class II antigen presentation; Cargo recognition for clathrin-mediated endocytosis; LDL clearance; Trafficking of GluR2-containing AMPA receptors; Retrograde neurotrophin signalling; Formation of annular gap junctions; WNT5A-dependent internalization of FZD4; WNT5A-dependent internalization of FZD2, FZD5 and ROR2; VLDLR internalisation and degradation		12	0	2.035	1
37	High	Master Protein	Q91ZX7	Prolow-density lipoprotein receptor-related protein 1 [OS=Mus musculus]	0	57.743	4	15	36	15	4545	504.4	5.36	49.53	15	cell cycle OR cell proliferation;cell organization and biogenesis;other metabolic processes;stress response;transport;developmental processes;signal transduction;other biological processes	plasma membrane;other membranes;cytoskeleton;ER/Golgi;nucleus;other cytoplasmic organelle;other cell component	signal transduction activity or receptor binding;other molecular function	Pf00008, Pf00057, Pf00058, Pf07645, Pf12662, Pf14670, Pf16472	16971		Lrp1	mmu:16971; Q61291; Q91ZX7; Q920Y4	Retinoid metabolism and transport; Scavenging of heme from plasma	Statin pathway; Wnt signaling pathway	4	0	2.03	1
38	High	Master Protein	P47857	ATP-dependent 6-phosphofructokinase, muscle type [OS=Mus musculus]	0	25.706	10	7	17	7	780	85.2	8	13.48	7	other metabolic processes;other biological processes	plasma membrane;other membranes;cytosol;cytoskeleton;nucleus	kinase activity;other molecular function	Pf00365	18642	ENSMUSG00000033065	Pfkm	C8CMN5; C8CMN6; C8CMN7; mmu:18642; O35513; P47857; Q543L1; Q9JK94	Glycolysis	Glycolysis and gluconeogenesis; Insulin signaling	3	0	2.005	1
39	High	Master Protein	P52480	Pyruvate kinase PKM [OS=Mus musculus]	0	46.756	31	12	30	12	531	57.8	7.47	47.47	12	cell organization and biogenesis;RNA metabolism OR transcription;other metabolic processes;developmental processes;other biological processes	cytosol;ER/Golgi;nucleus;other cell component	nucleic acid binding activity;kinase activity;other molecular function	Pf00224, Pf02887	18746	ENSMUSG00000032294	Pkm	mmu:18746; P52480; Q3TBV8; Q3TBW5; Q3TC59; Q3U1X3; Q3U5P6; Q4VC20; Q64484; Q91YI8; Q9CWB1	Neutrophil degranulation; Glycolysis	Glycolysis and gluconeogenesis; Purine metabolism	4	0	2.004	1
40	High	Master Protein	Q8C419	Probable G-protein coupled receptor 158 [OS=Mus musculus]	0	117.596	29	27	104	27	1200	134.3	8.09	146.21	27	signal transduction;other biological processes	plasma membrane;other membranes	other molecular function	Pf00003	241263	ENSMUSG00000045967	Gpr158	B1AWY4; mmu:241263; Q8C419; Q8CHB0		GPCRs, odorant	1	0	2.003	1	fold change >2
41	High	Master Protein	Q99P47	Contactin-associated protein-like 4 [OS=Mus musculus]	0	21.415	6	7	13	7	1310	144.6	7.06	7.3	7	cell adhesion;cell cycle OR cell proliferation;developmental processes;other biological processes	plasma membrane;other membranes;other cell component	other molecular function	Pf00754, Pf02210	170571	ENSMUSG00000031772	Cntnap4	mmu:170571; Q8K002; Q99P47			0	0	1.999	1
42	High	Master Protein	O09114	Prostaglandin-H2 D-isomerase [OS=Mus musculus]	0	17.498	25	5	22	5	189	21.1	8.25	32.72	5	other metabolic processes;transport;other biological processes	non-structural extracellular;other membranes;ER/Golgi;nucleus;other cell component	other molecular function	Pf00061	19215	ENSMUSG00000015090	Ptgds	mmu:19215; O09114; O09157; O35091; Q3V2G5; Q62169	Synthesis of Prostaglandins (PG) and Thromboxanes (TX)	Selenium micronutrient network; Folic acid network; Eicosanoid synthesis; Prostaglandin synthesis and regulation; Eicosanoid metabolism via cyclooxygenases (COX)	6	0	1.991	1
43	High	Master Protein	Q9Z2W8	Glutamate receptor 4 [OS=Mus musculus]	0	208.229	39	33	196	28	902	100.8	8.07	461.44	33	cell-cell signaling;transport;signal transduction;other biological processes	plasma membrane;other membranes;other cell component	transporter activity;other molecular function	Pf00060, Pf01094, Pf10613	14802	ENSMUSG00000025892	Gria4	mmu:14802; Q6P9M7; Q9Z2W8	Unblocking of NMDA receptors, glutamate binding and activation; Trafficking of GluR2-containing AMPA receptors; Synaptic adhesion-like molecules; Activation of AMPA receptors		5	6	1.988	1
44	High	Master Protein	P60202	Myelin proteolipid protein [OS=Mus musculus]	0	29.642	26	7	54	7	277	30.1	8.35	101.84	7	cell organization and biogenesis;other metabolic processes;stress response;developmental processes;signal transduction;other biological processes	plasma membrane;other membranes;other cell component	other molecular function	Pf01275	18823	ENSMUSG00000031425	Plp1	mmu:18823; P04400; P06905; P60202; Q9WUS9			0	0	1.983	1
45	High	Master Protein	Q9JMB8	Contactin-6 [OS=Mus musculus]	0	37.694	14	11	26	11	1028	113.7	6.64	31.21	11	cell adhesion;cell organization and biogenesis;developmental processes;signal transduction;other biological processes	plasma membrane;other membranes;other cell component	other molecular function	Pf00041, Pf07679, Pf13927	53870	ENSMUSG00000030092	Cntn6	mmu:53870; Q8C6X1; Q9JMB8			0	0	1.98	1
46	High	Master Protein	Q68FD5	Clathrin heavy chain 1 [OS=Mus musculus]	0	121.266	22	30	73	30	1675	191.4	5.69	125.45	30	cell cycle OR cell proliferation;cell organization and biogenesis;other metabolic processes;transport;other biological processes	plasma membrane;other membranes;cytosol;cytoskeleton;ER/Golgi;nucleus;other cytoplasmic organelle;other cell component	signal transduction activity or receptor binding;cytoskeletal activity;nucleic acid binding activity;other molecular function	Pf00637, Pf01394, Pf09268, Pf13838	67300	ENSMUSG00000047126	Cltc	mmu:67300; Q68FD5	Recycling pathway of L1; MHC class II antigen presentation; Golgi Associated Vesicle Biogenesis; Lysosome Vesicle Biogenesis; Formation of annular gap junctions; Cargo recognition for clathrin-mediated endocytosis; VLDLR internalisation and degradation; RHOU GTPase cycle; LDL clearance; RHOV GTPase cycle; Retrograde neurotrophin signalling; WNT5A-dependent internalization of FZD4; WNT5A-dependent…	IL-7 signaling pathway; Kit receptor signaling pathway	17	0	1.976	1
47	High	Master Protein	Q5F226	Protocadherin Fat 2 [OS=Mus musculus]	0	311.963	22	77	243	77	4351	479.8	5.12	420.43	77	cell adhesion;other biological processes	plasma membrane;other membranes;ER/Golgi;other cell component	other molecular function	Pf00008, Pf00028, Pf02210	245827	ENSMUSG00000055333	Fat2	mmu:245827; Q3V1D4; Q5F226; Q69ZY7			0	0	1.97	1
48	High	Master Protein	Q6PHS9	Voltage-dependent calcium channel subunit alpha-2/delta-2 [OS=Mus musculus]	0	43.732	15	13	31	13	1154	130.3	5.66	31.45	13	cell organization and biogenesis;transport;other biological processes	plasma membrane;other membranes	transporter activity;other molecular function	Pf00092, Pf08399, Pf08473	56808	ENSMUSG00000010066	Cacna2d2	B2RY16; mmu:56808; Q3TPT9; Q3TSS6; Q6PHS9; Q6REE3; Q8C8R8; Q8CHE9; Q920H5; Q920H6; Q9EQG2; Q9R142	Regulation of insulin secretion; Presynaptic depolarization and calcium channel opening; Phase 0 - rapid depolarisation; Phase 2 - plateau phase		4	0	1.957	1
49	High	Master Protein	P62827	GTP-binding nuclear protein Ran [OS=Mus musculus]	0	14.622	22	4	17	4	216	24.4	7.49	24.56	4	cell cycle OR cell proliferation;cell organization and biogenesis;other metabolic processes;transport;developmental processes;other biological processes	cytosol;cytoskeleton;nucleus;other cytoplasmic organelle;other cell component	nucleic acid binding activity;other molecular function	Pf00071	19384	ENSMUSG00000029430	Ran	mmu:19384; P17080; P28746; P28747; P62827; Q3U954; Q811M2; Q86V08; Q9CSP3; Q9CWI7; Q9CZA2; Q9UDJ5; Q9UEU9	Transcriptional regulation by small RNAs; Postmitotic nuclear pore complex (NPC) reformation; Regulation of cholesterol biosynthesis by SREBP (SREBF)		3	0	1.955	1
50	High	Master Protein	Q9CQI6	Coactosin-like protein [OS=Mus musculus]	0	8.878	27	5	14	5	142	15.9	5.4	1.67	5	cell organization and biogenesis;stress response	cytosol;cytoskeleton;nucleus;other cell component	cytoskeletal activity;other molecular function	Pf00241	72042	ENSMUSG00000031827	Cotl1	mmu:72042; Q9CQI6	Neutrophil degranulation		1	0	1.945	1
51	High	Master Protein	P13595	Neural cell adhesion molecule 1 [OS=Mus musculus]	0	52.025	14	13	37	13	1115	119.4	4.83	54.83	13	cell adhesion;cell organization and biogenesis;stress response;developmental processes;signal transduction;other biological processes	plasma membrane;other membranes;cytosol;other cell component	other molecular function	Pf00041, Pf07679, Pf13927	17967		Ncam1	mmu:17967; P13594; P13595; Q61949; Q61950; Q6LBU8; Q8BQ96; Q8C4B2; Q921P2; Q9R2A7	RAF/MAP kinase cascade; NCAM1 interactions; Signal transduction by L1		4	0	1.943	1
52	High	Master Protein	P28665	Murinoglobulin-1 [OS=Mus musculus]	0	36.623	8	10	25	10	1476	165.2	6.42	25.78	10	developmental processes;other biological processes	non-structural extracellular	enzyme regulator activity;other molecular function	Pf00207, Pf01835, Pf07677, Pf07678, Pf07703, Pf17789, Pf17791	17836	ENSMUSG00000059908	Mug1	mmu:17836; P28665; Q3UNE7; Q80XE6			0	0	1.937	1
53	High	Master Protein	Q8BR86	Kin of IRRE-like protein 3 [OS=Mus musculus]	0	13.312	8	5	19	5	778	85.4	6.93	17.17	5	cell adhesion;cell organization and biogenesis;developmental processes;other biological processes	non-structural extracellular;plasma membrane;other membranes;ER/Golgi;other cell component	other molecular function	Pf07679, Pf13895, Pf13927	67703	ENSMUSG00000032036	Kirrel3	mmu:67703; Q6P555; Q810H3; Q8BGQ5; Q8BR86; Q8BRS8	Nephrin family interactions	Primary focal segmental glomerulosclerosis (FSGS)	2	0	1.929	1
54	High	Master Protein	P56564	Excitatory amino acid transporter 1 [OS=Mus musculus]	0	60.838	18	8	49	6	543	59.6	8.4	87.82	8	other metabolic processes;stress response;transport;developmental processes;other biological processes	plasma membrane;other membranes;mitochondrion;other cell component	transporter activity;other molecular function	Pf00375	20512	ENSMUSG00000005360	Slc1a3	mmu:20512; P56564; Q99P53	Glutamate Neurotransmitter Release Cycle; Transport of inorganic cations/anions and amino acids/oligopeptides; Astrocytic Glutamate-Glutamine Uptake And Metabolism		3	3	1.924	1
55	High	Master Protein	B2RXS4	Plexin-B2 [OS=Mus musculus]	0	32.12	5	8	21	8	1842	206.1	5.87	40.71	8	cell adhesion;cell cycle OR cell proliferation;cell organization and biogenesis;developmental processes;signal transduction;other biological processes	plasma membrane;other membranes;other cell component	other molecular function	Pf01403, Pf01437, Pf01833, Pf08337, Pf17960, Pf20170	140570	ENSMUSG00000036606	Plxnb2	B2RXS4; mmu:140570; Q3UH76			0	0	1.92	1
56	High	Master Protein	P39053	Dynamin-1 [OS=Mus musculus]	0	19.605	9	9	21	9	867	97.7	7.74	6.62	9	cell organization and biogenesis;transport;other biological processes	plasma membrane;other membranes;cytoskeleton;ER/Golgi;other cell component	signal transduction activity or receptor binding;cytoskeletal activity;other molecular function	Pf00169, Pf00350, Pf01031, Pf02212	13429	ENSMUSG00000026825	Dnm1	A2AN50; A2AN51; A2AN54; A2AN55; mmu:13429; P39053; Q3UNM1; Q5DTN7; Q61358; Q61359; Q61360; Q6PDM5; Q8JZZ4; Q9CSY7; Q9QXX1	MHC class II antigen presentation; Recycling pathway of L1; Clathrin-mediated endocytosis; Formation of annular gap junctions; Toll Like Receptor 4 (TLR4) Cascade	One-carbon metabolism and related pathways; Primary focal segmental glomerulosclerosis (FSGS); IL-3 signaling pathway; EGFR1 signaling pathway	10	0	1.918	1
57	High	Master Protein	P63101	14-3-3 protein zeta/delta [OS=Mus musculus]	0	26.657	31	7	24	4	245	27.8	4.79	20.46	7	cell-cell signaling;cell organization and biogenesis;protein metabolism;other metabolic processes;stress response;transport;developmental processes;signal transduction;other biological processes	cytosol;nucleus;other cell component	other molecular function	Pf00244	22631	ENSMUSG00000022285	Ywhaz	mmu:22631; P35215; P63101; P70197; P97286; Q3TSF1; Q5EBQ1	Deactivation of the beta-catenin transactivating complex; TP53 Regulates Metabolic Genes; Activation of BAD and translocation to mitochondria ; RHO GTPases activate PKNs; Chk1/Chk2(Cds1) mediated inactivation of Cyclin B:Cdk1 complex; Rap1 signalling; GP1b-IX-V activation signalling; Interleukin-3, Interleukin-5 and GM-CSF signaling; Regulation of localization of FOXO transcription factors; NOTCH…	IL-5 signaling pathway; IL-3 signaling pathway; Myometrial relaxation and contraction pathways; Alpha 6 beta 4 integrin signaling pathway; Calcium regulation in cardiac cells	16	3	1.912	1
58	High	Master Protein	P02301	Histone H3.3C [OS=Mus musculus]	0	7.561	22	4	14	4	136	15.3	11.14	0	4	cell organization and biogenesis	nucleus;other cell component	nucleic acid binding activity;other molecular function	Pf00125			H3-5	P02301			0	0	1.911	1
59	High	Master Protein	P97427	Dihydropyrimidinase-related protein 1 [OS=Mus musculus]	0	13.831	10	4	8	4	572	62.1	7.12	15.51	4	signal transduction;other biological processes	cytosol;cytoskeleton;nucleus;other cell component	cytoskeletal activity;other molecular function	Pf01979	12933	ENSMUSG00000029121	Crmp1	mmu:12933; O08554; O35097; P97427	CRMPs in Sema3A signaling		1	0	1.903	1
60	High	Master Protein	Q80YX1	Tenascin [OS=Mus musculus]	0	16.845	4	8	16	8	2110	231.7	4.89	7.44	8	cell adhesion;cell-cell signaling;cell organization and biogenesis;stress response;developmental processes;other biological processes	non-structural extracellular;extracellular matrix	other molecular function	Pf00041, Pf00147, Pf07974, Pf18720	21923	ENSMUSG00000028364	Tnc	mmu:21923; Q64706; Q80YX1; Q80YX2	Regulation of Insulin-like Growth Factor (IGF) transport and uptake by Insulin-like Growth Factor Binding Proteins (IGFBPs); Post-translational protein phosphorylation; ECM proteoglycans; Integrin cell surface interactions	Focal adhesion: PI3K-Akt-mTOR signaling pathway; Focal adhesion	6	0	1.9	1
61	High	Master Protein	O88343	Electrogenic sodium bicarbonate cotransporter 1 [OS=Mus musculus]	0	24.787	7	7	19	7	1079	121.4	6.84	23.27	7	transport;other biological processes	plasma membrane;other membranes;other cell component	transporter activity;other molecular function	Pf00955, Pf07565	54403	ENSMUSG00000060961	Slc4a4	mmu:54403; O88343; Q3USE4; Q8BUG0; Q8QZR9; Q9R1C4	Bicarbonate transporters		1	0	1.883	1
62	High	Master Protein	P16305	Gamma-aminobutyric acid receptor subunit alpha-6 [OS=Mus musculus]	0	29.157	22	8	20	8	453	51.1	8.07	36.47	8	cell-cell signaling;transport;signal transduction;other biological processes	plasma membrane;other membranes;other cell component	transporter activity;other molecular function	Pf02931, Pf02932	14399	ENSMUSG00000020428	Gabra6	mmu:14399; P16305; Q5SUU5; Q9R0V3; Q9R0V4; Q9R0V5	GABA receptor activation		1	0	1.876	1
63	High	Master Protein	O08599	Syntaxin-binding protein 1 [OS=Mus musculus]	0	62.244	30	13	34	13	594	67.5	6.96	65.88	13	cell adhesion;cell-cell signaling;cell organization and biogenesis;stress response;transport;developmental processes;other biological processes	plasma membrane;other membranes;cytosol;cytoskeleton;nucleus;other cell component	other molecular function	Pf00995	20910	ENSMUSG00000026797	Stxbp1	A2ARS2; A2ARS3; A2ARS4; mmu:20910; O08599; Q5WAC6; Q8VD51	Dopamine Neurotransmitter Release Cycle; Serotonin Neurotransmitter Release Cycle; Norepinephrine Neurotransmitter Release Cycle; Glutamate Neurotransmitter Release Cycle; Acetylcholine Neurotransmitter Release Cycle; GABA synthesis, release, reuptake and degradation	EGFR1 signaling pathway; Insulin signaling	8	0	1.858	1
64	High	Master Protein	Q6GQT1	Alpha-2-macroglobulin-P [OS=Mus musculus]	0	21.711	5	8	12	8	1474	164.2	6.61	4.26	8	stress response;developmental processes;other biological processes	non-structural extracellular	signal transduction activity or receptor binding;enzyme regulator activity;other molecular function	Pf00207, Pf01835, Pf07677, Pf07678, Pf07703, Pf17789, Pf17791	232345	ENSMUSG00000030111	A2m	E9QMQ7; mmu:232345; Q6GQT1; Q811S0	Platelet degranulation ; HDL assembly; Degradation of the extracellular matrix; Intrinsic Pathway of Fibrin Clot Formation		4	0	1.847	1
65	High	Master Protein	Q9D6M3	Mitochondrial glutamate carrier 1 [OS=Mus musculus]	0	9.654	12	4	8	4	323	34.6	9.09	6.96	4	other metabolic processes;transport;other biological processes	other membranes;mitochondrion	transporter activity	Pf00153	68267	ENSMUSG00000019082	Slc25a22	mmu:68267; Q3TRY1; Q9D6M3	Organic anion transporters		1	0	1.844	1
66	High	Master Protein	P63056	Noelin-3 [OS=Mus musculus]	0	8.598	7	4	10	4	478	54.9	8.15	3.51	4	developmental processes;signal transduction	non-structural extracellular;plasma membrane;other membranes;ER/Golgi;other cell component		Pf02191, Pf12308	229759	ENSMUSG00000027965	Olfm3	mmu:229759; P63056; Q8BKV2; Q8BLL6; Q8QZW0; Q8R4K3; Q8R4K4			0	0	1.843	1
67	High	Master Protein	P43006	Excitatory amino acid transporter 2 [OS=Mus musculus]	0	62.393	25	10	40	10	572	62	6.68	87.12	10	cell organization and biogenesis;other metabolic processes;stress response;transport;developmental processes;other biological processes	plasma membrane;other membranes;other cell component	transporter activity;other molecular function	Pf00375	20511	ENSMUSG00000005089	Slc1a2	mmu:20511; O35877; O54686; O54687; P43006	Glutamate Neurotransmitter Release Cycle; Transport of inorganic cations/anions and amino acids/oligopeptides; Astrocytic Glutamate-Glutamine Uptake And Metabolism	Oxidative stress and redox pathway	4	0	1.842	1
68	High	Master Protein	O70133	ATP-dependent RNA helicase A [OS=Mus musculus]	0	32.608	7	9	20	9	1380	149.4	6.83	22.96	9	cell organization and biogenesis;RNA metabolism OR transcription;other metabolic processes;stress response;transport;other biological processes	cytosol;cytoskeleton;translational apparatus;nucleus;other cell component	translation activity;nucleic acid binding activity;other molecular function	Pf00035, Pf00270, Pf00271, Pf04408, Pf07717	13211		Dhx9	mmu:13211; O35931; O54703; O70133; Q5FWY1; Q6R5F7; Q9CSA2	mRNA Splicing - Major Pathway; RIP-mediated NFkB activation via ZBP1; DEx/H-box helicases activate type I IFN and inflammatory cytokines production	Mechanisms associated with pluripotency; mRNA processing	5	0	1.838	1
69	High	Master Protein	Q6PIC6	Sodium/potassium-transporting ATPase subunit alpha-3 [OS=Mus musculus]	0	141.525	33	26	105	12	1013	111.6	5.41	170.45	26	cell organization and biogenesis;transport;signal transduction;other biological processes	plasma membrane;other membranes;ER/Golgi;nucleus;other cell component	signal transduction activity or receptor binding;transporter activity;other molecular function	Pf00122, Pf00689, Pf00690, Pf13246	232975	ENSMUSG00000040907	Atp1a3	mmu:232975; Q6PIC6	Ion homeostasis; Ion transport by P-type ATPases		2	0	1.836	1
70	High	Master Protein	P16330	2',3'-cyclic-nucleotide 3'-phosphodiesterase [OS=Mus musculus]	0	97.847	50	20	84	20	420	47.1	8.97	175	20	cell organization and biogenesis;other metabolic processes;transport;developmental processes;other biological processes	non-structural extracellular;plasma membrane;other membranes;cytoskeleton;mitochondrion;other cell component	nucleic acid binding activity;other molecular function	Pf05881, Pf13671	12799	ENSMUSG00000006782	Cnp	mmu:12799; P16330; Q61424; Q8C7C9; Q91V42; Q923F3			0	0	1.828	1
71	High	Master Protein	Q3TXX4	Vesicular glutamate transporter 1 [OS=Mus musculus]	0	12.951	5	4	16	4	560	61.6	7.34	10.61	4	cell-cell signaling;cell organization and biogenesis;transport;signal transduction;other biological processes	plasma membrane;other membranes;ER/Golgi;other cell component	transporter activity	Pf07690	72961	ENSMUSG00000070570	Slc17a7	E9QMT8; mmu:72961; Q3TXX4	Glutamate Neurotransmitter Release Cycle; Organic anion transporters		2	0	1.824	1
72	High	Master Protein	P61205	ADP-ribosylation factor 3 [OS=Mus musculus]	0	29.225	51	7	20	7	181	20.6	7.43	47.29	7	transport	plasma membrane;other membranes;ER/Golgi;other cell component	other molecular function	Pf00025	11842	ENSMUSG00000051853	Arf3	mmu:11842; P16587; P61205	COPI-dependent Golgi-to-ER retrograde traffic; COPI-mediated anterograde transport; Synthesis of PIPs at the Golgi membrane		3	0	1.821	1
73	High	Master Protein	Q61545	RNA-binding protein EWS [OS=Mus musculus]	0	109.984	17	10	87	10	655	68.4	9.33	220.29	10	RNA metabolism OR transcription;other biological processes	plasma membrane;other membranes;nucleus;other cell component	nucleic acid binding activity;other molecular function	Pf00076, Pf00641	14030	ENSMUSG00000009079	Ewsr1	mmu:14030; Q61545; Q9D2P0		Mechanisms associated with pluripotency; mRNA processing	2	0	1.819	1
74	High	Master Protein	P48962	ADP/ATP translocase 1 [OS=Mus musculus]	0	66.069	46	16	92	9	298	32.9	9.72	148.05	16	cell organization and biogenesis;other metabolic processes;transport;other biological processes	other membranes;mitochondrion	transporter activity;other molecular function	Pf00153	11739	ENSMUSG00000031633	Slc25a4	mmu:11739; P48962; Q62164	Transport of nucleosides and free purine and pyrimidine bases across the plasma membrane	Electron transport chain; mRNA processing	3	8	1.803	1
75	High	Master Protein	P01027	Complement C3 [OS=Mus musculus]	0	28.755	5	8	27	8	1663	186.4	6.73	38.49	8	cell-cell signaling;cell organization and biogenesis;protein metabolism;other metabolic processes;stress response;developmental processes;signal transduction;other biological processes	non-structural extracellular;plasma membrane;other membranes;other cell component	signal transduction activity or receptor binding;enzyme regulator activity;other molecular function	Pf00207, Pf01759, Pf01821, Pf01835, Pf07677, Pf07678, Pf07703, Pf17789, Pf17790, Pf17791	12266	ENSMUSG00000024164	C3	mmu:12266; P01027; Q61370; Q80XP1	Immunoregulatory interactions between a Lymphoid and a non-Lymphoid cell; Regulation of Complement cascade; Neutrophil degranulation; Regulation of Insulin-like Growth Factor (IGF) transport and uptake by Insulin-like Growth Factor Binding Proteins (IGFBPs); Post-translational protein phosphorylation; G alpha (i) signalling events; Peptide ligand-binding receptors; Alternative complement activati…	Complement activation, classical pathway; Tyrobp causal network in microglia; Comprehensive IL-17A signaling	12	0	1.8	1
76	High	Master Protein	P63011	Ras-related protein Rab-3A [OS=Mus musculus]	0	47.517	53	9	36	8	220	25	5.03	86.2	9	cell-cell signaling;cell organization and biogenesis;stress response;transport;developmental processes;other biological processes	plasma membrane;other membranes;cytosol;ER/Golgi;other cytoplasmic organelle;other cell component	cytoskeletal activity;other molecular function	Pf00071	19339	ENSMUSG00000031840	Rab3a	mmu:19339; P05713; P63011; Q3TSL4	Dopamine Neurotransmitter Release Cycle; Serotonin Neurotransmitter Release Cycle; Norepinephrine Neurotransmitter Release Cycle; Glutamate Neurotransmitter Release Cycle; Acetylcholine Neurotransmitter Release Cycle; GABA synthesis, release, reuptake and degradation; Neutrophil degranulation; RAB GEFs exchange GTP for GDP on RABs; RAB geranylgeranylation		9	1	1.79	1
77	High	Master Protein	Q60932	Voltage-dependent anion-selective channel protein 1 [OS=Mus musculus]	0	39.949	39	8	31	7	296	32.3	8.43	70.61	8	cell-cell signaling;other metabolic processes;stress response;transport;other biological processes	plasma membrane;other membranes;mitochondrion;ER/Golgi;other cell component	transporter activity;other molecular function	Pf01459	22333	ENSMUSG00000020402	Vdac1	B1ASZ9; mmu:22333; Q5SVC6; Q60932	Ub-specific processing proteases; PINK1-PRKN Mediated Mitophagy; Pyruvate metabolism		3	1	1.788	1
78	High	Master Protein	P60710	Actin, cytoplasmic 1 [OS=Mus musculus]	0	75.567	50	14	65	5	375	41.7	5.48	109	14	cell organization and biogenesis;protein metabolism;other metabolic processes;developmental processes;other biological processes	plasma membrane;other membranes;cytosol;cytoskeleton;nucleus;other cell component	cytoskeletal activity;other molecular function	Pf00022	11461	ENSMUSG00000029580	Actb	mmu:11461; P02570; P60710; P70514; P99021; Q11211; Q3TI89; Q3TVP6; Q64316; Q6ZWM3	Regulation of actin dynamics for phagocytic cup formation; RHOBTB2 GTPase cycle; Interaction between L1 and Ankyrins; MAP2K and MAPK activation; RHO GTPases Activate Formins; Recycling pathway of L1; RHO GTPases activate IQGAPs; Clathrin-mediated endocytosis; EPHB-mediated forward signaling; Adherens junctions interactions; Formation of annular gap junctions; VEGFA-VEGFR2 Pathway; Cell-extracellu…	Myometrial relaxation and contraction pathways; Regulation of actin cytoskeleton; Focal adhesion	18	10	1.785	1
79	High	Master Protein	Q99N28	Cell adhesion molecule 3 [OS=Mus musculus]	0	29.787	29	6	12	6	396	42.9	5.8	18.68	6	cell adhesion;other biological processes	plasma membrane;other membranes;other cell component	other molecular function	Pf07679, Pf08205, Pf13927	94332	ENSMUSG00000005338	Cadm3	mmu:94332; Q8BSQ8; Q8K1H8; Q99N28	Nectin/Necl trans heterodimerization	Splicing factor NOVA regulated synaptic proteins	3	0	1.782	1
80	High	Master Protein	Q6PIE5	Sodium/potassium-transporting ATPase subunit alpha-2 [OS=Mus musculus]	0	122.868	28	26	96	10	1020	112.1	5.55	137.07	26	other metabolic processes;stress response;transport;developmental processes;other biological processes	plasma membrane;other membranes;other cytoplasmic organelle;other cell component	transporter activity;other molecular function	Pf00122, Pf00689, Pf00690, Pf00702, Pf13246	98660	ENSMUSG00000007097	Atp1a2	mmu:98660; Q6PIE5; Q80UZ8	Ion homeostasis; Ion transport by P-type ATPases		2	15	1.777	1
81	High	Master Protein	Q56A07	Sodium channel subunit beta-2 [OS=Mus musculus]	0	42.023	37	7	30	7	215	24.2	6.54	60.43	7	other metabolic processes;stress response;transport;developmental processes;other biological processes	plasma membrane;other membranes	transporter activity;other molecular function	Pf07686	72821	ENSMUSG00000070304	Scn2b	mmu:72821; Q56A07			0	0	1.773	1
82	High	Master Protein	P15209	BDNF/NT-3 growth factors receptor [OS=Mus musculus]	0	40.814	12	7	23	7	821	92.1	6.55	27.78	7	cell-cell signaling;protein metabolism;other metabolic processes;transport;developmental processes;signal transduction;other biological processes	plasma membrane;other membranes;cytosol;ER/Golgi;other cytoplasmic organelle;other cell component	signal transduction activity or receptor binding;kinase activity;other molecular function	Pf07679, Pf07714, Pf13855, Pf16920	18212	ENSMUSG00000055254	Ntrk2	mmu:18212; P15209; Q3TUF9; Q80WU0; Q91XJ9	Activated NTRK2 signals through PLCG1; Activated NTRK2 signals through FRS2 and FRS3; NTRK2 activates RAC1	BDNF pathway	4	0	1.764	1
83	High	Master Protein	Q8K2B3	Succinate dehydrogenase [ubiquinone] flavoprotein subunit, mitochondrial [OS=Mus musculus]	0	9.499	8	4	10	4	664	72.5	7.37	2.01	4	other metabolic processes;developmental processes	other membranes;mitochondrion;nucleus	other molecular function	Pf00890, Pf02910	66945	ENSMUSG00000021577	Sdha	mmu:66945; Q0QF19; Q3UH25; Q3UKP7; Q3V4B1; Q8K2B3; Q921P5; Q9Z1Z4	Citric acid cycle (TCA cycle)	Electron transport chain; TCA cycle	3	0	1.759	1
84	High	Master Protein	Q8VDN2	Sodium/potassium-transporting ATPase subunit alpha-1 [OS=Mus musculus]	0	110.567	27	23	83	10	1023	112.9	5.45	126.14	23	transport;other biological processes	plasma membrane;other membranes;cytoskeleton;ER/Golgi;other cytoplasmic organelle;other cell component	transporter activity;cytoskeletal activity;other molecular function	Pf00122, Pf00689, Pf00690, Pf00702, Pf13246	11928	ENSMUSG00000033161	Atp1a1	mmu:11928; Q8VDN2; Q91Z09	Ion homeostasis; Ion transport by P-type ATPases		2	0	1.753	1
85	High	Master Protein	P56959	RNA-binding protein FUS [OS=Mus musculus]	0	128.813	20	13	202	13	518	52.6	9.36	504.86	13	cell organization and biogenesis;protein metabolism;RNA metabolism OR transcription;other metabolic processes;other biological processes	nucleus;other cell component	signal transduction activity or receptor binding;cytoskeletal activity;nucleic acid binding activity;other molecular function	Pf00076, Pf00641	233908	ENSMUSG00000030795	Fus	mmu:233908; P56959	mRNA Splicing - Major Pathway; Processing of Capped Intron-Containing Pre-mRNA	mRNA processing	3	0	1.748	1
86	High	Master Protein	Q7TMK9	Heterogeneous nuclear ribonucleoprotein Q [OS=Mus musculus]	0	29.777	14	8	36	8	623	69.6	8.59	42.92	8	RNA metabolism OR transcription;other metabolic processes;stress response;other biological processes	other membranes;cytosol;ER/Golgi;nucleus;other cell component	nucleic acid binding activity	Pf00076, Pf18360	56403	ENSMUSG00000032423	Syncrip	mmu:56403; O88991; Q2YDV8; Q68ED6; Q7TMK9; Q80YV6; Q8BGP1; Q8C5K6; Q8CGC2; Q91ZR0; Q99KU9; Q9QYF4		mRNA processing	1	0	1.746	1
87	High	Master Protein	P04925	Major prion protein [OS=Mus musculus]	0	20.766	22	5	18	5	254	28	9.33	12.41	5	cell organization and biogenesis;other metabolic processes;stress response;signal transduction;other biological processes	plasma membrane;other membranes;cytosol;mitochondrion;ER/Golgi;nucleus;other cell component	signal transduction activity or receptor binding;enzyme regulator activity;cytoskeletal activity;other molecular function	Pf00377, Pf11587	19122	ENSMUSG00000079037	Prnp	mmu:19122; P04925	Insertion of tail-anchored proteins into the endoplasmic reticulum membrane		1	0	1.744	1
88	High	Master Protein	P62806	Histone H4 [OS=Mus musculus]	0	13.384	39	4	16	4	103	11.4	11.36	37.58	4	cell organization and biogenesis;other biological processes	nucleus;other cell component	nucleic acid binding activity;other molecular function	Pf15511	100041230; 319155; 319156; 319157; 319158; 319159; 319160; 319161; 320332; 326619; 326620; 69386; 97122	ENSMUSG00000060093; ENSMUSG00000060639; ENSMUSG00000060678; ENSMUSG00000060981; ENSMUSG00000061482; ENSMUSG00000064288; ENSMUSG00000067455; ENSMUSG00000069266; ENSMUSG00000069274; ENSMUSG00000069305; ENSMUSG00000069306; ENSMUSG00000091405; ENSMUSG00000096010	H4c1; H4c11; H4c12; H4c14; H4c16; H4c2; H4c3; H4c4; H4c6; H4c8; H4c9; Hist1h4m	A0AUM5; A4FUP8; A4QMY0; mmu:100041230; mmu:319155; mmu:319156; mmu:319157; mmu:319158; mmu:319159; mmu:319160; mmu:319161; mmu:320332; mmu:326619; mmu:326620; mmu:69386; mmu:97122; P02304; P02305; P62806; Q0VDL9; Q2M2Q5; Q5T006; Q6PDS7; Q811M0; Q9D0C9; Q9D6Q8	Recruitment and ATM-mediated phosphorylation of repair and signaling proteins at DNA double strand breaks; SUMOylation of chromatin organization proteins; PKMTs methylate histone lysines; Deposition of new CENPA-containing nucleosomes at the centromere; RMTs methylate histone arginines; HATs acetylate histones; RUNX1 regulates genes involved in megakaryocyte differentiation and platelet function;…	Type II interferon signaling (IFNG)	15	0	1.74	1
89	High	Master Protein	Q8BYI9	Tenascin-R [OS=Mus musculus]	0	228.258	36	33	179	33	1358	149.5	4.94	452.12	33	cell adhesion;cell-cell signaling;cell organization and biogenesis;stress response;developmental processes;other biological processes	non-structural extracellular;extracellular matrix;other membranes;other cell component	signal transduction activity or receptor binding;other molecular function	Pf00041, Pf00147, Pf18720	21960	ENSMUSG00000015829	Tnr	A2RT70; mmu:21960; O88717; Q8BYI9	ECM proteoglycans	Focal adhesion: PI3K-Akt-mTOR signaling pathway; Focal adhesion	3	0	1.735	1
90	High	Master Protein	Q80TS3	Adhesion G protein-coupled receptor L3 [OS=Mus musculus]	0	20.64	5	7	13	7	1537	171	6.71	8.35	7	cell adhesion;cell organization and biogenesis;developmental processes;signal transduction;other biological processes	plasma membrane;other membranes;other cell component	other molecular function	Pf00002, Pf01825, Pf02140, Pf02191, Pf02354, Pf16489	319387	ENSMUSG00000037605	Adgrl3	mmu:319387; Q3UHI7; Q3UM79; Q504Z9; Q5HZJ6; Q80T56; Q80TS3		GPCRs, non-odorant ; GPCRs, class B secretin-like	2	0	1.728	1
91	High	Master Protein	Q9DB72	BTB/POZ domain-containing protein 17 [OS=Mus musculus]	0	107.342	43	14	66	14	478	52.6	9.42	162.11	14		non-structural extracellular		Pf00651, Pf07707	72014	ENSMUSG00000000202	Btbd17	mmu:72014; Q9DB72			0	0	1.724	1
92	High	Master Protein	P14094	Sodium/potassium-transporting ATPase subunit beta-1 [OS=Mus musculus]	0	14.817	16	4	10	4	304	35.2	8.65	13.21	4	cell adhesion;other metabolic processes;stress response;transport;signal transduction;other biological processes	plasma membrane;other membranes;cytoskeleton;other cell component	transporter activity;other molecular function	Pf00287	11931	ENSMUSG00000026576	Atp1b1	mmu:11931; P14094	Ion homeostasis; Ion transport by P-type ATPases	Calcium regulation in cardiac cells	3	0	1.687	1
93	High	Master Protein	P17182	Alpha-enolase [OS=Mus musculus]	0	17.326	15	6	9	6	434	47.1	6.8	13.1	6	RNA metabolism OR transcription;other metabolic processes;developmental processes;other biological processes	plasma membrane;other membranes;cytosol;nucleus;other cell component	nucleic acid binding activity;other molecular function	Pf00113, Pf03952	13806; 433182	ENSMUSG00000059040; ENSMUSG00000063524	Eno1	mmu:13806; mmu:433182; P17182; Q99KT7; Q9DCY7	Gluconeogenesis; Glycolysis	Glycolysis and gluconeogenesis	3	0	1.685	1
94	High	Master Protein	P49312	Heterogeneous nuclear ribonucleoprotein A1 [OS=Mus musculus]	0	44.657	31	10	46	6	320	34.2	9.23	81.41	10	RNA metabolism OR transcription;other metabolic processes;transport;other biological processes	cytosol;nucleus;other cell component	nucleic acid binding activity;other molecular function	Pf00076, Pf11627	15382	ENSMUSG00000046434	Hnrnpa1	mmu:15382; P49312; P97312; Q3V269	mRNA Splicing - Major Pathway; Processing of Capped Intron-Containing Pre-mRNA; FGFR2 alternative splicing	mRNA processing	4	0	1.683	1
95	High	Master Protein	P43406	Integrin alpha-V [OS=Mus musculus]	0	37.369	13	11	29	11	1044	115.3	5.63	36.67	11	cell adhesion;cell organization and biogenesis;other metabolic processes;stress response;transport;developmental processes;signal transduction;other biological processes	plasma membrane;other membranes;cytosol;other cell component	signal transduction activity or receptor binding;transporter activity;other molecular function	Pf00357, Pf01839, Pf08441	16410	ENSMUSG00000027087	Itgav	A2AKI6; mmu:16410; P43406	Neutrophil degranulation; Integrin cell surface interactions; ECM proteoglycans; Syndecan interactions; TGF-beta receptor signaling activates SMADs; Molecules associated with elastic fibres; Signal transduction by L1; VEGFA-VEGFR2 Pathway; PECAM1 interactions; Cross-presentation of particulate exogenous antigens (phagosomes)	Primary focal segmental glomerulosclerosis (FSGS); Integrin-mediated cell adhesion	13	0	1.68	1
96	High	Master Protein	Q91V12	Cytosolic acyl coenzyme A thioester hydrolase [OS=Mus musculus]	0	20.309	15	4	12	4	381	42.5	8.68	28.32	4	other metabolic processes	cytosol;mitochondrion;nucleus;other cell component	other molecular function	Pf03061	70025	ENSMUSG00000028937	Acot7	A2A8K9; A2A8L0; A2A8L2; mmu:70025; Q3U8C6; Q59HQ2; Q91V12	Mitochondrial Fatty Acid Beta-Oxidation		1	0	1.671	1
97	High	Master Protein	P16125	L-lactate dehydrogenase B chain [OS=Mus musculus]	0	22.894	19	6	23	5	334	36.5	6.05	23.66	6	other metabolic processes	other membranes;cytosol;mitochondrion;other cell component	other molecular function	Pf00056, Pf02866	16832	ENSMUSG00000030246	Ldhb	mmu:16832; P16125; Q545Y4	Pyruvate metabolism	Glycolysis and gluconeogenesis	2	1	1.667	1
98	High	Master Protein	B9EKR1	Receptor-type tyrosine-protein phosphatase zeta [OS=Mus musculus]	0	71.74	6	12	64	12	2312	254.2	4.88	114.01	12	cell organization and biogenesis;protein metabolism;other metabolic processes;developmental processes;other biological processes	non-structural extracellular;extracellular matrix;plasma membrane;other membranes;other cell component	signal transduction activity or receptor binding;other molecular function	Pf00041, Pf00102, Pf00194	19283	ENSMUSG00000068748	Ptprz1	B9EKR1; mmu:19283	Signaling by ALK; Other interleukin signaling	Spinal cord injury	3	0	1.667	1
99	High	Master Protein	Q9R0K7	Plasma membrane calcium-transporting ATPase 2 [OS=Mus musculus]	0	93.315	20	20	67	13	1198	132.5	5.96	96.59	20	cell organization and biogenesis;other metabolic processes;transport;developmental processes;other biological processes	plasma membrane;other membranes;ER/Golgi;other cell component	signal transduction activity or receptor binding;transporter activity;other molecular function	Pf00122, Pf00689, Pf00690, Pf08282, Pf12424, Pf13246	11941	ENSMUSG00000030302	Atp2b2	mmu:11941; O88863; Q9R0K7	Ion homeostasis; Ion transport by P-type ATPases; Reduction of cytosolic Ca++ levels	Calcium regulation in cardiac cells	4	8	1.665	1
100	High	Master Protein	P00920	Carbonic anhydrase 2 [OS=Mus musculus]	0	31.664	24	5	23	5	260	29	7.01	50.8	5	transport;signal transduction;other biological processes	non-structural extracellular;plasma membrane;other membranes;cytosol;other cell component	other molecular function	Pf00194	12349	ENSMUSG00000027562	Ca2	mmu:12349; P00920; Q6LDQ7; Q7TPE1; Q9DCT3; Q9DCY9	Erythrocytes take up carbon dioxide and release oxygen; Erythrocytes take up oxygen and release carbon dioxide; Reversible hydration of carbon dioxide		3	0	1.644	1
101	High	Master Protein	Q6P9K9	Neurexin-3 [OS=Mus musculus]	0	43.871	8	10	32	6	1571	173.3	6.14	56.87	10	cell adhesion;cell-cell signaling;cell organization and biogenesis;transport;developmental processes;other biological processes	plasma membrane;other membranes;other cell component	other molecular function	Pf00008, Pf02210	18191	ENSMUSG00000066392	Nrxn3	E9PW93; E9Q466; mmu:18191; Q6P9K9; Q8CCT8	Neurexins and neuroligins		1	1	1.639	1
102	High	Master Protein	P59279	Ras-related protein Rab-2B [OS=Mus musculus]	0	17.397	24	4	6	4	216	24.2	6.68	12.1	4	cell organization and biogenesis;stress response;transport;other biological processes	plasma membrane;other membranes;ER/Golgi;other cell component	other molecular function	Pf00071	76338	ENSMUSG00000022159	Rab2b	mmu:76338; P59279; Q3TV67	RAB geranylgeranylation		1	0	1.623	1
103	High	Master Protein	O54991	Contactin-associated protein 1 [OS=Mus musculus]	0	147.911	28	33	138	33	1385	156.2	7.06	243.66	33	cell adhesion;cell organization and biogenesis;developmental processes;other biological processes	plasma membrane;other membranes;other cell component	other molecular function	Pf00754, Pf02210	53321	ENSMUSG00000017167	Cntnap1	A2A4K6; mmu:53321; O54991			0	0	1.623	1
104	High	Master Protein	Q64444	Carbonic anhydrase 4 [OS=Mus musculus]	0	68.483	42	10	72	10	305	34.3	8.21	106.63	10	transport;other biological processes	non-structural extracellular;plasma membrane;other membranes;cytosol;ER/Golgi;other cell component	other molecular function	Pf00194	12351	ENSMUSG00000000805	Ca4	mmu:12351; Q64444	Erythrocytes take up carbon dioxide and release oxygen; Erythrocytes take up oxygen and release carbon dioxide; Reversible hydration of carbon dioxide		3	0	1.595	1
105	High	Master Protein	P29533	Vascular cell adhesion protein 1 [OS=Mus musculus]	0	9.796	6	5	9	5	739	81.3	5.3	1.86	5	cell adhesion;other metabolic processes;developmental processes;signal transduction;other biological processes	non-structural extracellular;plasma membrane;other membranes;cytoskeleton;ER/Golgi;other cytoplasmic organelle;other cell component	signal transduction activity or receptor binding;other molecular function	Pf00047, Pf05790, Pf07679, Pf13927		ENSMUSG00000027962	Vcam1	P29533	Immunoregulatory interactions between a Lymphoid and a non-Lymphoid cell; Integrin cell surface interactions		2	0	1.589	1
106	High	Master Protein	Q8K4Z0	Leucine-rich repeat LGI family member 2 [OS=Mus musculus]	0	9.071	6	4	7	4	550	63	6.54	3.58	4	cell organization and biogenesis;developmental processes			Pf03736, Pf13855	246316	ENSMUSG00000039252	Lgi2	mmu:246316; Q80T76; Q8K4Z0	LGI-ADAM interactions		1	0	1.585	1
107	High	Master Protein	Q99KI0	Aconitate hydratase, mitochondrial [OS=Mus musculus]	0	10.333	6	4	9	4	780	85.4	7.93	5.57	4	other metabolic processes;stress response;developmental processes	cytosol;mitochondrion	other molecular function	Pf00330, Pf00694	11429	ENSMUSG00000022477	Aco2	mmu:11429; Q3UDK9; Q3ULG9; Q3UNH7; Q505P4; Q99KI0	Citric acid cycle (TCA cycle)	TCA cycle	2	0	1.579	1
108	High	Master Protein	P12960	Contactin-1 [OS=Mus musculus]	0	293.196	46	38	256	38	1020	113.3	6.16	490.95	38	cell adhesion;cell organization and biogenesis;other metabolic processes;developmental processes;signal transduction;other biological processes	plasma membrane;other membranes;other cell component	other molecular function	Pf00041, Pf00047, Pf07679, Pf13927	12805	ENSMUSG00000055022	Cntn1	mmu:12805; P12960; Q6NXV7; Q8BR42; Q8C6A0		Delta-Notch signaling pathway	1	0	1.575	1
109	High	Master Protein	Q810U3	Neurofascin [OS=Mus musculus]	0	31.867	9	9	15	9	1240	137.9	6.19	21.03	9	cell adhesion;cell organization and biogenesis;developmental processes;other biological processes	plasma membrane;other membranes;other cell component	other molecular function	Pf00041, Pf00047, Pf07679, Pf13882, Pf13927	269116	ENSMUSG00000026442	Nfasc	mmu:269116; Q810U3	Neutrophil degranulation; Neurofascin interactions		2	0	1.567	1
110	High	Master Protein	P14231	Sodium/potassium-transporting ATPase subunit beta-2 [OS=Mus musculus]	0	31.966	27	6	22	6	290	33.3	8.31	42.14	6	cell adhesion;cell organization and biogenesis;transport;developmental processes;other biological processes	plasma membrane;other membranes;other cell component	transporter activity;other molecular function	Pf00287	11932	ENSMUSG00000041329	Atp1b2	mmu:11932; P14231	Ion homeostasis; Ion transport by P-type ATPases	Calcium regulation in cardiac cells	3	0	1.566	1
111	High	Master Protein	P63001	Ras-related C3 botulinum toxin substrate 1 [OS=Mus musculus]	0	20.743	37	6	18	5	192	21.4	8.5	22.75	6	cell adhesion;cell-cell signaling;cell cycle OR cell proliferation;cell organization and biogenesis;stress response;transport;developmental processes;signal transduction;other biological processes	plasma membrane;other membranes;cytosol;cytoskeleton;ER/Golgi;nucleus;other cytoplasmic organelle;other cell component	other molecular function	Pf00071	19353	ENSMUSG00000001847	Rac1	mmu:19353; O95501; P15154; P63001; Q9BTB4	MAPK6/MAPK4 signaling; Regulation of actin dynamics for phagocytic cup formation; FCERI mediated MAPK activation; Neutrophil degranulation; PIP3 activates AKT signaling; PI5P, PP2A and IER3 Regulate PI3K/AKT Signaling; Signaling by SCF-KIT; NTRK2 activates RAC1; Factors involved in megakaryocyte development and platelet production; RAC1 GTPase cycle; NRAGE signals death through JNK; RHO GTPases A…	IL-5 signaling pathway; MicroRNAs in cardiomyocyte hypertrophy; BDNF pathway; Chemokine signaling pathway; G13 signaling pathway; p38 Mapk signaling pathway; Microglia pathogen phagocytosis pathway; IL-3 signaling pathway; Robo4 and VEGF signaling pathways crosstalk; IL-6 signaling pathway; Wnt signaling pathway; Oxidative stress and redox pathway; Alpha 6 beta 4 integrin signaling pathway; Mapk …	57	1	1.556	1
112	High	Master Protein	Q60931	Voltage-dependent anion-selective channel protein 3 [OS=Mus musculus]	0	22.679	22	5	19	4	283	30.7	8.79	41.48	5	cell-cell signaling;cell organization and biogenesis;stress response;transport;other biological processes	other membranes;mitochondrion;ER/Golgi	transporter activity;other molecular function	Pf01459	22335	ENSMUSG00000008892	Vdac3	mmu:22335; Q60931; Q8BNG2	Ub-specific processing proteases		1	0	1.53	1
113	High	Master Protein	P35700	Peroxiredoxin-1 [OS=Mus musculus]	0	16.183	24	5	16	5	199	22.2	8.12	15.94	5	cell cycle OR cell proliferation;other metabolic processes;stress response;other biological processes	cytosol;mitochondrion;nucleus;other cytoplasmic organelle;other cell component	other molecular function	Pf00578, Pf10417	18477	ENSMUSG00000028691	Prdx1	mmu:18477; P35700; Q3UBV4; Q9CWI2	TP53 Regulates Metabolic Genes; Detoxification of Reactive Oxygen Species; NFE2L2 regulating anti-oxidant/detoxification enzymes	Oxidative stress and redox pathway	4	0	1.526	1
114	High	Master Protein	Q61330	Contactin-2 [OS=Mus musculus]	0	17.987	8	6	15	6	1040	113.1	7.62	9.02	6	cell adhesion;cell organization and biogenesis;protein metabolism;other metabolic processes;transport;developmental processes;signal transduction;other biological processes	plasma membrane;other membranes;other cell component	other molecular function	Pf00041, Pf07679, Pf13927	21367	ENSMUSG00000053024	Cntn2	mmu:21367; Q61330; Q6NZJ4; Q7TSJ5			0	0	1.523	1
115	High	Master Protein	Q99PJ0	Neurotrimin [OS=Mus musculus]	0	54.496	31	8	53	8	344	38	7.81	104.45	8	cell adhesion;other biological processes	non-structural extracellular;plasma membrane;other membranes;other cell component		Pf07679, Pf13927		ENSMUSG00000059974	Ntm	Q99PJ0	Post-translational modification: synthesis of GPI-anchored proteins		1	0	1.516	1
116	High	Master Protein	Q810U4	Neuronal cell adhesion molecule [OS=Mus musculus]	0	38.355	11	10	25	10	1256	138.4	5.91	32.44	10	cell adhesion;cell organization and biogenesis;developmental processes;other biological processes	non-structural extracellular;plasma membrane;other membranes;other cell component	cytoskeletal activity;other molecular function	Pf00041, Pf07679, Pf13882, Pf13927	319504	ENSMUSG00000020598	Nrcam	mmu:319504; Q80U33; Q810U4; Q8BLG8; Q8BX92; Q8BYJ8			0	0	1.515	1
117	High	Master Protein	Q91V14	Solute carrier family 12 member 5 [OS=Mus musculus]	0	25.644	9	8	13	8	1138	126.2	6.74	9.2	8	cell-cell signaling;cell organization and biogenesis;stress response;transport;developmental processes;other biological processes	plasma membrane;other membranes;other cell component	transporter activity;other molecular function	Pf00324, Pf03522	57138	ENSMUSG00000017740	Slc12a5	A2A5L0; mmu:57138; Q3UHQ2; Q7TQC9; Q80TI5; Q91V14; Q9Z0M7	Cation-coupled Chloride cotransporters		1	0	1.514	1
118	High	Master Protein	P16858	Glyceraldehyde-3-phosphate dehydrogenase [OS=Mus musculus]	0	93.046	41	10	68	10	333	35.8	8.25	165.12	10	cell organization and biogenesis;protein metabolism;other metabolic processes;stress response;signal transduction;other biological processes	plasma membrane;other membranes;cytosol;cytoskeleton;nucleus;other cytoplasmic organelle;other cell component	enzyme regulator activity;cytoskeletal activity;other molecular function	Pf00044, Pf02800	14433	ENSMUSG00000057666	Gapdh	A6H6A8; mmu:14433; P16858; Q0QEU0; Q3THM2; Q3TUI2; Q3UMT2; Q4V783; Q569X2; Q569X5; Q5U410	Gluconeogenesis; Glycolysis	Glycolysis and gluconeogenesis	3	0	1.505	1
119	High	Master Protein	P28651	Carbonic anhydrase-related protein [OS=Mus musculus]	0	41.128	42	8	31	8	291	33.1	4.78	60.46	8	signal transduction	other cell component	other molecular function	Pf00194	12319	ENSMUSG00000041261	Ca8	mmu:12319; P28651; Q8CF58; Q91XF6			0	0	1.461	1
120	High	Master Protein	P11881	Inositol 1,4,5-trisphosphate receptor type 1 [OS=Mus musculus]	0	19.124	4	9	11	9	2749	313	6.04	0	9	cell-cell signaling;stress response;transport;developmental processes;signal transduction;other biological processes	plasma membrane;other membranes;cytosol;ER/Golgi;nucleus;other cell component	transporter activity;other molecular function	Pf00520, Pf01365, Pf02815, Pf08454, Pf08709	16438	ENSMUSG00000030102	Itpr1	mmu:16438; P11881; P20943; Q99LG5	Antigen activates B Cell Receptor (BCR) leading to generation of second messengers; Ion homeostasis; Effects of PIP2 hydrolysis; Glucagon-like Peptide-1 (GLP1) regulates insulin secretion; Elevation of cytosolic Ca2+ levels; cGMP effects	Alzheimer's disease; G protein signaling pathways; Myometrial relaxation and contraction pathways; Calcium regulation in cardiac cells	10	0	1.44	1
121	High	Master Protein	Q8VEK3	Heterogeneous nuclear ribonucleoprotein U [OS=Mus musculus]	0	16.85	7	6	13	6	800	87.9	6.24	4.16	6	cell cycle OR cell proliferation;cell organization and biogenesis;RNA metabolism OR transcription;other metabolic processes;transport;developmental processes;other biological processes	cytosol;cytoskeleton;nucleus;other cell component	cytoskeletal activity;nucleic acid binding activity;other molecular function	Pf00622, Pf02037, Pf13671	51810	ENSMUSG00000039630	Hnrnpu	G3XA10; mmu:51810; Q8VEK3; Q9R205	mRNA Splicing - Major Pathway; Processing of Capped Intron-Containing Pre-mRNA	Mechanisms associated with pluripotency; mRNA processing	4	0	1.427	1
122	High	Master Protein	P11627	Neural cell adhesion molecule L1 [OS=Mus musculus]	0	28.725	9	8	24	8	1260	140.9	5.97	23.93	8	cell adhesion;cell organization and biogenesis;developmental processes;signal transduction;other biological processes	plasma membrane;other membranes;other cytoplasmic organelle;other cell component	signal transduction activity or receptor binding;other molecular function	Pf00041, Pf07679, Pf13882, Pf13927			L1cam	P11627	Interaction between L1 and Ankyrins; Recycling pathway of L1; Signal transduction by L1		4	0	1.418	1
123	High	Master Protein	Q03265	ATP synthase subunit alpha, mitochondrial [OS=Mus musculus]	0	7.811	6	4	5	4	553	59.7	9.19	0	4	other metabolic processes;transport;other biological processes	plasma membrane;other membranes;mitochondrion;nucleus;other cell component	signal transduction activity or receptor binding;transporter activity;other molecular function	Pf00006, Pf00306, Pf02874	11946	ENSMUSG00000025428	Atp5f1a	mmu:11946; Q03265; Q3TFN0; Q3THN8; Q3TPR0; Q3TPV3; Q3TZU3; Q3UIR7; Q543Y6	Formation of ATP by chemiosmotic coupling; Cristae formation	Oxidative phosphorylation; Electron transport chain	4	0	1.416	1
124	High	Master Protein	P05063	Fructose-bisphosphate aldolase C [OS=Mus musculus]	0	20.55	17	5	15	4	363	39.4	7.12	29.05	5	other metabolic processes;other biological processes	cytosol;other cell component	cytoskeletal activity;other molecular function	Pf00274	11676	ENSMUSG00000017390	Aldoc	mmu:11676; P05063; Q64011; Q8CA91; Q99K96; Q9DBA4; Q9JK32	Neutrophil degranulation; Gluconeogenesis; Glycolysis	Glycolysis and gluconeogenesis	4	1	1.406	1
125	High	Master Protein	Q99020	Heterogeneous nuclear ribonucleoprotein A/B [OS=Mus musculus]	0	23.616	28	7	21	6	285	30.8	7.91	28.07	7	RNA metabolism OR transcription;other metabolic processes;other biological processes	cytosol;nucleus;other cell component	nucleic acid binding activity;other molecular function	Pf00076, Pf08143	15384	ENSMUSG00000020358	Hnrnpab	mmu:15384; Q8BPE0; Q99020		mRNA processing	1	0	1.399	1
126	High	Master Protein	Q61292	Laminin subunit beta-2 [OS=Mus musculus]	0	35.853	8	12	21	12	1799	196.5	6.67	13.22	12	cell adhesion;cell organization and biogenesis;stress response;developmental processes;other biological processes	non-structural extracellular;extracellular matrix;other cell component	signal transduction activity or receptor binding;extracellular structural activity	Pf00053, Pf00055	16779	ENSMUSG00000052911	Lamb2	mmu:16779; Q61292; Q62182; Q8R0Y0		Primary focal segmental glomerulosclerosis (FSGS); Focal adhesion: PI3K-Akt-mTOR signaling pathway; Inflammatory response pathway; Alpha 6 beta 4 integrin signaling pathway; Focal adhesion	5	0	1.388	1
127	High	Master Protein	Q60668	Heterogeneous nuclear ribonucleoprotein D0 [OS=Mus musculus]	0	70.709	28	11	61	9	355	38.3	7.81	115.54	11	RNA metabolism OR transcription;other metabolic processes;developmental processes;other biological processes	cytosol;nucleus;other cell component	nucleic acid binding activity;other molecular function	Pf00076, Pf08143	11991	ENSMUSG00000000568	Hnrnpd	mmu:11991; Q60667; Q60668; Q80ZJ0; Q91X94	mRNA Splicing - Major Pathway; Processing of Capped Intron-Containing Pre-mRNA; AUF1 (hnRNP D0) binds and destabilizes mRNA	mRNA processing	4	0	1.384	1
128	High	Master Protein	Q8HW98	IgLON family member 5 [OS=Mus musculus]	0	25.467	16	4	17	4	336	36.7	7.69	35.98	4		non-structural extracellular		Pf00047, Pf13927	210094	ENSMUSG00000013367	Iglon5	A7E1X9; mmu:210094; Q8HW98			0	0	1.379	1
129	High	Master Protein	P04370	Myelin basic protein [OS=Mus musculus]	0	15.802	18	4	15	4	250	27.2	9.58	29.17	4	cell organization and biogenesis;developmental processes;signal transduction;other biological processes	plasma membrane;other membranes;nucleus;other cell component	other molecular function	Pf01669	17196	ENSMUSG00000041607	Mbp	mmu:17196; P04370; Q01585; Q03139; Q03176; Q61836; Q61837; Q99KE4; Q9QWP1		Neural crest differentiation; Spinal cord injury; Mapk cascade	3	0	1.379	1
130	High	Master Protein	P15105	Glutamine synthetase [OS=Mus musculus]	0	19.397	17	6	15	6	373	42.1	7.08	26.89	6	cell cycle OR cell proliferation;protein metabolism;other metabolic processes;stress response;developmental processes;other biological processes	plasma membrane;other membranes;cytosol;ER/Golgi;other cell component	other molecular function	Pf00120, Pf03951	14645	ENSMUSG00000026473	Glul	mmu:14645; P15105; Q3TRK7; Q64432; Q91VC6	Glutamate and glutamine metabolism; Astrocytic Glutamate-Glutamine Uptake And Metabolism		2	0	1.379	1
131	High	Master Protein	Q61830	Macrophage mannose receptor 1 [OS=Mus musculus]	0	11.013	3	4	7	4	1456	164.9	6.83	5.51	4	stress response;transport;other biological processes	plasma membrane;other membranes;other cytoplasmic organelle;other cell component	other molecular function	Pf00040, Pf00059, Pf00652	17533	ENSMUSG00000026712	Mrc1	mmu:17533; Q61830; Q8C502	Cross-presentation of soluble exogenous antigens (endosomes)		1	0	1.367	1
132	High	Master Protein	Q8BG05	Heterogeneous nuclear ribonucleoprotein A3 [OS=Mus musculus]	0	97.758	36	15	104	13	379	39.6	9.01	187.01	15	RNA metabolism OR transcription;other metabolic processes;transport	nucleus;other cell component	transporter activity;nucleic acid binding activity	Pf00076	229279	ENSMUSG00000059005	Hnrnpa3	mmu:229279; Q8BG05; Q8BHF8	mRNA Splicing - Major Pathway; Processing of Capped Intron-Containing Pre-mRNA	mRNA processing	3	0	1.364	1
133	High	Master Protein	Q9Z130	Heterogeneous nuclear ribonucleoprotein D-like [OS=Mus musculus]	0	91.738	30	12	70	10	301	33.5	7.31	162.62	12	RNA metabolism OR transcription;other metabolic processes;other biological processes	nucleus;other cell component	nucleic acid binding activity	Pf00076			Hnrnpdl	Q9CT01; Q9Z130			0	2	1.361	1
134	High	Master Protein	Q9QUP5	Hyaluronan and proteoglycan link protein 1 [OS=Mus musculus]	0	49.679	31	12	58	11	356	40.5	7.8	86.76	12	cell adhesion;developmental processes;other biological processes	non-structural extracellular;extracellular matrix;other cell component	other molecular function	Pf00193, Pf07686	12950	ENSMUSG00000021613	Hapln1	mmu:12950; Q9D1G9; Q9QUP5; Q9Z1X7	ECM proteoglycans		1	1	1.339	1
135	High	Master Protein	P18872	Guanine nucleotide-binding protein G(o) subunit alpha [OS=Mus musculus]	0	21.562	26	8	17	8	354	40.1	5.53	10.96	8	transport;signal transduction;other biological processes	plasma membrane;other membranes;other cell component	signal transduction activity or receptor binding;other molecular function	Pf00503	14681	ENSMUSG00000031748	Gnao1	mmu:14681; P18872; P18873	Ca2+ pathway	G protein signaling pathways; Calcium regulation in cardiac cells	3	0	1.337	1
136	High	Master Protein	Q61361	Brevican core protein [OS=Mus musculus]	0	47.128	17	15	54	15	883	95.8	4.93	76.03	15	cell adhesion;cell organization and biogenesis;developmental processes;other biological processes	non-structural extracellular;extracellular matrix;other cell component	other molecular function	Pf00008, Pf00059, Pf00084, Pf00193, Pf07686	12032	ENSMUSG00000004892	Bcan	mmu:12032; Q61361; Q80WT7	Degradation of the extracellular matrix; ECM proteoglycans; A tetrasaccharide linker sequence is required for GAG synthesis; Chondroitin sulfate biosynthesis; CS/DS degradation; Dermatan sulfate biosynthesis	Spinal cord injury	7	0	1.336	1
137	High	Master Protein	O55143	Sarcoplasmic/endoplasmic reticulum calcium ATPase 2 [OS=Mus musculus]	0	27.597	8	7	23	7	1044	114.8	5.34	26.55	7	cell organization and biogenesis;other metabolic processes;stress response;transport;signal transduction;other biological processes	plasma membrane;other membranes;cytosol;ER/Golgi;other cell component	signal transduction activity or receptor binding;transporter activity;other molecular function	Pf00122, Pf00689, Pf00690, Pf08282, Pf13246	11938	ENSMUSG00000029467	Atp2a2	mmu:11938; O55143; Q9R2A9; Q9WUT5	Ion homeostasis; Ion transport by P-type ATPases; Reduction of cytosolic Ca++ levels	Alzheimer's disease; Myometrial relaxation and contraction pathways; Calcium regulation in cardiac cells	6	0	1.329	1
138	High	Master Protein	Q05793	Basement membrane-specific heparan sulfate proteoglycan core protein [OS=Mus musculus]	0	30.987	3	11	19	11	3707	398	6.32	1.88	11	cell organization and biogenesis;transport;developmental processes;signal transduction;other biological processes	non-structural extracellular;extracellular matrix;ER/Golgi	other molecular function	Pf00008, Pf00052, Pf00053, Pf00054, Pf00057, Pf07679, Pf13927	15530		Hspg2	mmu:15530; Q05793			0	0	1.326	1
139	High	Master Protein	P68369	Tubulin alpha-1A chain [OS=Mus musculus]	0	93.438	51	17	74	6	451	50.1	5.06	166.39	17	cell cycle OR cell proliferation;cell organization and biogenesis;other metabolic processes;transport;developmental processes;signal transduction;other biological processes	plasma membrane;other membranes;cytosol;cytoskeleton;other cytoplasmic organelle;other cell component	cytoskeletal activity;other molecular function	Pf00091, Pf03953	22142	ENSMUSG00000072235	Tuba1a	mmu:22142; P02551; P05210; P05212; P68369; Q3TGF0; Q3TIW2; Q3TPJ1; Q3ULN1; Q5XJF8	HSP90 chaperone cycle for steroid hormone receptors (SHR) in the presence of ligand; The role of GTSE1 in G2/M progression after G2 checkpoint; RHO GTPases Activate Formins; Recycling pathway of L1; RHO GTPases activate IQGAPs; COPI-independent Golgi-to-ER retrograde traffic; Separation of Sister Chromatids; Regulation of PLK1 Activity at G2/M Transition; Aggrephagy; COPI-dependent Golgi-to-ER re…		28	10	1.301	1
140	High	Master Protein	P28798	Progranulin [OS=Mus musculus]	0	26.571	15	6	15	6	589	63.4	6.8	21.92	6	cell cycle OR cell proliferation;cell organization and biogenesis;protein metabolism;other metabolic processes;stress response;transport;developmental processes;signal transduction;other biological processes	non-structural extracellular;plasma membrane;other membranes;ER/Golgi;other cytoplasmic organelle;other cell component	signal transduction activity or receptor binding;other molecular function	Pf00396	14824	ENSMUSG00000034708	Grn	mmu:14824; P28798	Neutrophil degranulation		1	0	1.277	1
141	High	Master Protein	P43274	Histone H1.4 [OS=Mus musculus]	0	18.764	16	5	27	5	219	22	11.11	47.31	5	cell organization and biogenesis;protein metabolism;other metabolic processes;other biological processes	nucleus;other cell component	nucleic acid binding activity;other molecular function	Pf00538	50709	ENSMUSG00000051627	H1-4	mmu:50709; P43274; Q5EBH3	Formation of Senescence-Associated Heterochromatin Foci (SAHF); Apoptosis induced DNA fragmentation		2	0	1.27	1
142	High	Master Protein	O88569	Heterogeneous nuclear ribonucleoproteins A2/B1 [OS=Mus musculus]	0	84.272	49	18	101	14	353	37.4	8.95	208	18	cell organization and biogenesis;DNA metabolism;RNA metabolism OR transcription;other metabolic processes;transport;other biological processes	non-structural extracellular;cytosol;nucleus;other cell component	nucleic acid binding activity;other molecular function	Pf00076, Pf11627	53379	ENSMUSG00000004980	Hnrnpa2b1	B9EJ02; mmu:53379; O88569; Q3UVJ5; Q6PCV9; Q8C2A0; Q8CJ71; Q91ZR9; Q9R204	mRNA Splicing - Major Pathway; Processing of Capped Intron-Containing Pre-mRNA	mRNA processing	3	4	1.267	1
143	High	Master Protein	Q62059	Versican core protein [OS=Mus musculus]	0	48.528	4	8	26	8	3357	366.6	4.64	51.4	8	cell adhesion;developmental processes;other biological processes	non-structural extracellular;extracellular matrix;other cell component	other molecular function	Pf00008, Pf00059, Pf00084, Pf00193, Pf07686			Vcan	Q62058; Q62059; Q9CUU0	Regulation of Insulin-like Growth Factor (IGF) transport and uptake by Insulin-like Growth Factor Binding Proteins (IGFBPs); Post-translational protein phosphorylation; ECM proteoglycans; A tetrasaccharide linker sequence is required for GAG synthesis; Chondroitin sulfate biosynthesis; CS/DS degradation; Dermatan sulfate biosynthesis		7	0	1.262	1
144	High	Master Protein	Q61171	Peroxiredoxin-2 [OS=Mus musculus]	0	14.53	23	4	10	4	198	21.8	5.41	11.01	4	cell cycle OR cell proliferation;other metabolic processes;stress response;developmental processes;signal transduction;other biological processes	cytosol	other molecular function	Pf00578, Pf10417	21672	ENSMUSG00000005161	Prdx2	mmu:21672; O88376; Q60796; Q61171; Q9CWJ4; Q9DB49	TP53 Regulates Metabolic Genes; Detoxification of Reactive Oxygen Species	Oxidative stress and redox pathway	3	0	1.261	1
145	High	Master Protein	O89051	Integral membrane protein 2B [OS=Mus musculus]	0	25.73	33	7	19	7	266	30.2	5.3	28.42	7	other biological processes	non-structural extracellular;plasma membrane;other membranes;ER/Golgi;other cytoplasmic organelle;other cell component	other molecular function	Pf04089	16432	ENSMUSG00000022108	Itm2b	mmu:16432; O89051; Q545S7		IL-2 signaling pathway	1	0	1.252	1
146	High	Master Protein	Q60930	Voltage-dependent anion-selective channel protein 2 [OS=Mus musculus]	0	30.629	32	7	29	7	295	31.7	7.49	62.98	7	cell organization and biogenesis;transport;signal transduction;other biological processes	other membranes;cytoskeleton;mitochondrion;ER/Golgi;other cell component	transporter activity;other molecular function	Pf01459	22334	ENSMUSG00000021771	Vdac2	mmu:22334; Q60930; Q78MH6; Q99L98	Ub-specific processing proteases		1	0	1.229	1
147	High	Master Protein	P07309	Transthyretin [OS=Mus musculus]	0	18.264	37	4	15	4	147	15.8	6.16	32.62	4	other metabolic processes;signal transduction	non-structural extracellular;other cell component	signal transduction activity or receptor binding;other molecular function	Pf00576	22139	ENSMUSG00000061808	Ttr	mmu:22139; P07309	Neutrophil degranulation; Retinoid metabolism and transport; The canonical retinoid cycle in rods (twilight vision)		3	0	1.227	1
148	High	Master Protein	Q61885	Myelin-oligodendrocyte glycoprotein [OS=Mus musculus]	0	15.237	17	4	10	4	246	28.3	7.96	6.39	4	cell adhesion;signal transduction;other biological processes	plasma membrane;other membranes;other cell component	signal transduction activity or receptor binding	Pf07686	17441		Mog	mmu:17441; P70364; Q61885; Q62003			0	0	1.188	1
149	High	Master Protein	P10493	Nidogen-1 [OS=Mus musculus]	0	49.591	12	13	34	12	1245	136.5	5.44	54.67	13	cell adhesion;cell-cell signaling;cell organization and biogenesis;developmental processes;signal transduction;other biological processes	non-structural extracellular;extracellular matrix;other cell component	other molecular function	Pf00058, Pf00086, Pf06119, Pf07474, Pf07645, Pf12662, Pf12947, Pf14670	18073	ENSMUSG00000005397	Nid1	mmu:18073; P10493; Q3TKX9; Q8BQI3; Q8C3U8; Q8C9P6	Laminin interactions; Degradation of the extracellular matrix		2	1	1.17	1
150	High	Master Protein	P12023	Amyloid-beta precursor protein [OS=Mus musculus]	0	12.464	5	4	10	4	770	86.7	4.79	14.34	4	cell adhesion;cell cycle OR cell proliferation;cell organization and biogenesis;protein metabolism;RNA metabolism OR transcription;other metabolic processes;stress response;transport;developmental processes;signal transduction;other biological processes	non-structural extracellular;plasma membrane;other membranes;cytoskeleton;mitochondrion;ER/Golgi;nucleus;other cytoplasmic organelle;other cell component	signal transduction activity or receptor binding;enzyme regulator activity;nucleic acid binding activity;other molecular function	Pf00014, Pf02177, Pf03494, Pf10515, Pf12924, Pf12925	11820	ENSMUSG00000022892	App	mmu:11820; P12023; P97487; P97942; Q99K32	Regulation of Insulin-like Growth Factor (IGF) transport and uptake by Insulin-like Growth Factor Binding Proteins (IGFBPs); Post-translational protein phosphorylation; TAK1-dependent IKK and NF-kappa-B activation ; Platelet degranulation ; ECM proteoglycans; G alpha (q) signalling events; G alpha (i) signalling events; Formyl peptide receptors bind formyl peptides and many other ligands; Inserti…	Alzheimer's disease; Delta-Notch signaling pathway	14	0	1.153	1
151	High	Master Protein	P39061	Collagen alpha-1(XVIII) chain [OS=Mus musculus]	0	15.459	3	6	15	6	1774	182.1	5.62	14.41	6	cell adhesion;cell cycle OR cell proliferation;cell organization and biogenesis;developmental processes;other biological processes	extracellular matrix;other cell component	extracellular structural activity;other molecular function	Pf01391, Pf01392, Pf06121, Pf06482, Pf13385, Pf20010	12822	ENSMUSG00000001435	Col18a1	mmu:12822; P39061; Q60672; Q61434; Q61437; Q62001; Q62002; Q6NZK9; Q6P1Y4; Q8CCZ8; Q9CRT2; Q9JK63	Assembly of collagen fibrils and other multimeric structures; Integrin cell surface interactions; Collagen chain trimerization; Collagen degradation; Activation of Matrix Metalloproteinases		6	0	1.126	1
152	High	Master Protein	Q04447	Creatine kinase B-type [OS=Mus musculus]	0	33.958	21	6	13	6	381	42.7	5.67	19.05	6	other metabolic processes;developmental processes;other biological processes	cytosol;mitochondrion;nucleus;other cell component	kinase activity;other molecular function	Pf00217, Pf02807	12709	ENSMUSG00000001270	Ckb	mmu:12709; Q04447; Q3KQP4; Q3TKI3; Q3U5P5; Q3UF71; Q9CXK6	RND3 GTPase cycle; Creatine metabolism		2	0	1.11	1
153	High	Master Protein	O35737	Heterogeneous nuclear ribonucleoprotein H [OS=Mus musculus]	0	16.773	14	5	13	5	449	49.2	6.3	20.97	5	RNA metabolism OR transcription;other metabolic processes;other biological processes	cytosol;nucleus;other cell component	nucleic acid binding activity;other molecular function	Pf00076, Pf08080	59013	ENSMUSG00000007850	Hnrnph1	mmu:59013; O35737	mRNA Splicing - Major Pathway; Processing of Capped Intron-Containing Pre-mRNA	mRNA processing	3	0	1.036	1
154	High	Master Protein	P70663	SPARC-like protein 1 [OS=Mus musculus]	0	30.97	15	7	17	7	650	72.2	4.6	14.33	7	cell adhesion;cell organization and biogenesis;signal transduction;other biological processes	non-structural extracellular;extracellular matrix;other cell component	other molecular function	Pf07648, Pf09289, Pf10591	13602	ENSMUSG00000029309	Sparcl1	E9QPH2; mmu:13602; P70663; P97810; Q99L82	Regulation of Insulin-like Growth Factor (IGF) transport and uptake by Insulin-like Growth Factor Binding Proteins (IGFBPs); Post-translational protein phosphorylation		2	0	1.036	1
155	High	Master Protein	O88322	Nidogen-2 [OS=Mus musculus]	0	29.004	7	9	17	8	1403	153.8	5.38	18.09	9	cell adhesion	non-structural extracellular;extracellular matrix;plasma membrane;other membranes;other cell component	other molecular function	Pf00058, Pf00086, Pf06119, Pf07474, Pf07645, Pf12947	18074	ENSMUSG00000021806	Nid2	mmu:18074; O88322; Q7TQF0	Laminin interactions		1	0	1.028	1
156	High	Master Protein	P61979	Heterogeneous nuclear ribonucleoprotein K [OS=Mus musculus]	0	12.279	11	5	7	5	463	50.9	5.54	8.59	5	RNA metabolism OR transcription;other metabolic processes;developmental processes;other biological processes	other membranes;cytosol;cytoskeleton;mitochondrion;nucleus;other cell component	cytoskeletal activity;nucleic acid binding activity;other molecular function	Pf00013, Pf08067	15387	ENSMUSG00000021546	Hnrnpk	mmu:15387; P61979; Q07244; Q15671; Q60577; Q8BGQ8; Q922Y7; Q96J62	mRNA Splicing - Major Pathway; Processing of Capped Intron-Containing Pre-mRNA; SUMOylation of RNA binding proteins	mRNA processing	4	0	0.896	1

## Sheet: FITM-BmTyr_b2
No.	Protein FDR Confidence: Combined	Master	Accession	Description	Exp. q-value: Combined	Sum PEP Score	Coverage [%]	# Peptides	# PSMs	# Unique Peptides	# AAs	MW [kDa]	calc. pI	Score Sequest HT: Sequest HT	# Peptides (by Search Engine): Sequest HT	Biological Process	Cellular Component	Molecular Function	Pfam IDs	Entrez Gene ID	Ensembl Gene ID	Gene Symbol	Gene ID	WikiPathways	Reactome Pathways	# Protein Pathway Groups	# Razor Peptides	Abundance Ratio: (FITM) / (wt)	# Protein Groups
1	High	Master Protein	Q6PHS9	Voltage-dependent calcium channel subunit alpha-2/delta-2 [OS=Mus musculus]	0	67.364	19	18	41	18	1154	130.3	5.66	52.66	18	cell organization and biogenesis;transport;other biological processes	plasma membrane;other membranes	transporter activity;other molecular function	Pf00092, Pf08399, Pf08473	56808	ENSMUSG00000010066	Cacna2d2	B2RY16; mmu:56808; Q3TPT9; Q3TSS6; Q6PHS9; Q6REE3; Q8C8R8; Q8CHE9; Q920H5; Q920H6; Q9EQG2; Q9R142		Regulation of insulin secretion; Presynaptic depolarization and calcium channel opening; Phase 0 - rapid depolarisation; Phase 2 - plateau phase	4	0	3.056	1
2	High	Master Protein	P97772	Metabotropic glutamate receptor 1 [OS=Mus musculus]	0	43.259	10	12	23	12	1199	133.1	6.86	43.56	12	cell-cell signaling;transport;signal transduction;other biological processes	plasma membrane;other membranes;nucleus;other cell component	other molecular function	Pf00003, Pf01094, Pf07562, Pf10606	14816	ENSMUSG00000019828	Grm1	mmu:14816; P97772; Q6AXG4; Q9EPV6	GPCRs, non-odorant ; Serotonin and anxiety; GPCRs, class C metabotropic glutamate, pheromone; GPCRs, other	G alpha (q) signalling events; Neurexins and neuroligins; Class C/3 (Metabotropic glutamate/pheromone receptors)	7	0	2.993	1
3	High	Master Protein	Q3UH99	Protein shisa-6 [OS=Mus musculus]	0	11.319	14	5	8	5	525	58.4	9.48	3.61	5	cell-cell signaling;signal transduction;other biological processes	plasma membrane;other membranes;other cell component	signal transduction activity or receptor binding;other molecular function	Pf13908	380702	ENSMUSG00000053930	Shisa6	A0A172Q417; mmu:380702; Q3UH99			0	0	2.986	1
4	High	Master Protein	P97797	Tyrosine-protein phosphatase non-receptor type substrate 1 [OS=Mus musculus]	0	27.711	15	5	8	5	513	56.4	8.28	13.43	5	cell adhesion;cell organization and biogenesis;stress response;transport;other biological processes	plasma membrane;other membranes;other cell component	enzyme regulator activity;other molecular function	Pf07654, Pf07686	19261	ENSMUSG00000037902	Sirpa	A0A0R4J1Z7; E0CYM8; E9QPT7; mmu:19261; O08907; O35924; O88555; O88556; P97796; P97797; Q8R559; Q9QX57; Q9WTN4	IL-1 signaling pathway	Cell surface interactions at the vascular wall; Neutrophil degranulation; DAP12 interactions; Signal regulatory protein family interactions	5	0	2.915	1
5	High	Master Protein	Q9Z2W8	Glutamate receptor 4 [OS=Mus musculus]	0	209.644	39	33	170	28	902	100.8	8.07	371.95	33	cell-cell signaling;transport;signal transduction;other biological processes	plasma membrane;other membranes;other cell component	transporter activity;other molecular function	Pf00060, Pf01094, Pf10613	14802	ENSMUSG00000025892	Gria4	mmu:14802; Q6P9M7; Q9Z2W8		Synaptic adhesion-like molecules; Trafficking of GluR2-containing AMPA receptors; Unblocking of NMDA receptors, glutamate binding and activation; Activation of AMPA receptors	5	6	2.896	1
6	High	Master Protein	Q61625	Glutamate receptor ionotropic, delta-2 [OS=Mus musculus]	0	169.387	34	30	108	30	1007	113	6.1	231.45	30	cell adhesion;cell-cell signaling;cell organization and biogenesis;transport;developmental processes;signal transduction;other biological processes	plasma membrane;other membranes;other cell component	transporter activity;other molecular function	Pf00060, Pf01094, Pf10613	14804	ENSMUSG00000071424	Grid2	A4QPG1; mmu:14804; Q61625			0	0	2.886	1
7	High	Master Protein	P70232	Neural cell adhesion molecule L1-like protein [OS=Mus musculus]	0	40.017	11	10	19	10	1209	135	5.57	30.79	10	cell adhesion;cell organization and biogenesis;stress response;developmental processes;other biological processes	non-structural extracellular;plasma membrane;other membranes;other cell component	other molecular function	Pf00041, Pf07679, Pf13882, Pf13927	12661	ENSMUSG00000030077	Chl1	A2RRK1; mmu:12661; P70232; Q8BS24; Q8C6W0; Q8C823; Q8VBY7	Splicing factor NOVA regulated synaptic proteins		1	0	2.702	1
8	High	Master Protein	P35436	Glutamate receptor ionotropic, NMDA 2A [OS=Mus musculus]	0	25.737	5	6	10	6	1464	165.3	7.01	22.27	6	cell-cell signaling;cell organization and biogenesis;protein metabolism;other metabolic processes;stress response;transport;developmental processes;signal transduction;other biological processes	plasma membrane;other membranes;ER/Golgi;other cell component	signal transduction activity or receptor binding;transporter activity;other molecular function	Pf00060, Pf01094, Pf10565, Pf10613	14811	ENSMUSG00000059003	Grin2a	mmu:14811; P35436	Alzheimer's disease	Synaptic adhesion-like molecules; Assembly and cell surface presentation of NMDA receptors; Unblocking of NMDA receptors, glutamate binding and activation	4	0	2.676	1
9	High	Master Protein	P23818	Glutamate receptor 1 [OS=Mus musculus]	0	37.861	11	10	39	7	907	101.5	7.69	63.63	10	cell-cell signaling;cell organization and biogenesis;transport;developmental processes;signal transduction;other biological processes	non-structural extracellular;plasma membrane;other membranes;cytosol;ER/Golgi;other cytoplasmic organelle;other cell component	signal transduction activity or receptor binding;transporter activity;cytoskeletal activity;other molecular function	Pf00060, Pf01094, Pf10613	14799	ENSMUSG00000020524	Gria1	mmu:14799; P23818		Synaptic adhesion-like molecules; COPII-mediated vesicle transport; Cargo concentration in the ER; Trafficking of GluR2-containing AMPA receptors; Unblocking of NMDA receptors, glutamate binding and activation; Activation of AMPA receptors	7	2	2.669	1
10	High	Master Protein	Q80T41	Gamma-aminobutyric acid type B receptor subunit 2 [OS=Mus musculus]	0	29.978	10	10	20	10	940	105.6	8.72	18.42	10	cell-cell signaling;signal transduction	plasma membrane;other membranes;other cell component	other molecular function	Pf00003, Pf01094, Pf18455	242425	ENSMUSG00000039809	Gabbr2	A2AL05; mmu:242425; Q80T41	GPCRs, non-odorant ; Splicing factor NOVA regulated synaptic proteins; GPCRs, class C metabotropic glutamate, pheromone	G alpha (i) signalling events; Class C/3 (Metabotropic glutamate/pheromone receptors); Activation of G protein gated Potassium channels; Inhibition of voltage gated Ca2+ channels via Gbeta/gamma subunits; GABA B receptor activation	8	0	2.438	1
11	High	Master Protein	Q56A07	Sodium channel subunit beta-2 [OS=Mus musculus]	0	42.516	37	7	26	7	215	24.2	6.54	46.34	7	other metabolic processes;stress response;transport;developmental processes;other biological processes	plasma membrane;other membranes	transporter activity;other molecular function	Pf07686	72821	ENSMUSG00000070304	Scn2b	mmu:72821; Q56A07			0	0	2.427	1
12	High	Master Protein	P15209	BDNF/NT-3 growth factors receptor [OS=Mus musculus]	0	47.727	14	9	23	9	821	92.1	6.55	39.86	9	cell-cell signaling;protein metabolism;other metabolic processes;transport;developmental processes;signal transduction;other biological processes	plasma membrane;other membranes;cytosol;ER/Golgi;other cytoplasmic organelle;other cell component	signal transduction activity or receptor binding;kinase activity;other molecular function	Pf07679, Pf07714, Pf13855, Pf16920	18212	ENSMUSG00000055254	Ntrk2	mmu:18212; P15209; Q3TUF9; Q80WU0; Q91XJ9	BDNF pathway	Activated NTRK2 signals through PLCG1; Activated NTRK2 signals through FRS2 and FRS3; NTRK2 activates RAC1	4	0	2.351	1
13	High	Master Protein	Q68EF4	Metabotropic glutamate receptor 4 [OS=Mus musculus]	0	43.628	14	11	18	10	912	101.8	8.82	28.64	11	cell-cell signaling;signal transduction;other biological processes	plasma membrane;other membranes;other cell component	other molecular function	Pf00003, Pf01094, Pf07562	268934		Grm4	mmu:268934; Q68EF4; Q80UC2	GPCRs, class C metabotropic glutamate, pheromone	G alpha (i) signalling events; Class C/3 (Metabotropic glutamate/pheromone receptors)	3	1	2.347	1
14	High	Master Protein	O89051	Integral membrane protein 2B [OS=Mus musculus]	0	24.815	26	6	24	6	266	30.2	5.3	44.6	6	other biological processes	non-structural extracellular;plasma membrane;other membranes;ER/Golgi;other cytoplasmic organelle;other cell component	other molecular function	Pf04089	16432	ENSMUSG00000022108	Itm2b	mmu:16432; O89051; Q545S7	IL-2 signaling pathway		1	0	2.343	1
15	High	Master Protein	Q6GQU6	Leucine-rich repeat and immunoglobulin-like domain-containing nogo receptor-interacting protein 3 [OS=Mus musculus]	0	65.427	29	13	32	13	589	64.6	8.31	67.81	13		non-structural extracellular;extracellular matrix;other membranes		Pf07679, Pf13855	237403	ENSMUSG00000051067	Lingo3	E9QK50; mmu:237403; Q6GQU6			0	0	2.325	1
16	High	Master Protein	Q64487	Receptor-type tyrosine-protein phosphatase delta [OS=Mus musculus]	0	15.721	3	5	6	5	1912	214.3	6.55	2.35	5	cell adhesion;cell-cell signaling;cell organization and biogenesis;protein metabolism;other metabolic processes;developmental processes;other biological processes	plasma membrane;other membranes;other cell component	signal transduction activity or receptor binding;other molecular function	Pf00041, Pf00102, Pf07679, Pf13927	19266	ENSMUSG00000028399	Ptprd	G3X9S7; mmu:19266; Q64486; Q64487; Q64488; Q64495; Q8VBV0		Synaptic adhesion-like molecules; Receptor-type tyrosine-protein phosphatases	2	0	2.322	1
17	High	Master Protein	Q8CJH3	Plexin-B1 [OS=Mus musculus]	0	25.917	3	5	7	5	2119	231.2	5.55	20.2	5	cell organization and biogenesis;developmental processes;signal transduction;other biological processes	plasma membrane;other membranes;other cell component	other molecular function	Pf01403, Pf01437, Pf01833, Pf08337, Pf17960, Pf18020, Pf20170	235611	ENSMUSG00000053646	Plxnb1	E9QKS4; mmu:235611; Q6ZQC3; Q80ZZ1; Q8CJH3		G alpha (12/13) signalling events; RHOD GTPase cycle; Sema4D mediated inhibition of cell attachment and migration; Sema4D induced cell migration and growth-cone collapse	4	0	2.256	1
18	High	Master Protein	Q5F226	Protocadherin Fat 2 [OS=Mus musculus]	0	296.524	21	74	216	74	4351	479.8	5.12	349.22	74	cell adhesion;other biological processes	plasma membrane;other membranes;ER/Golgi;other cell component	other molecular function	Pf00008, Pf00028, Pf02210	245827	ENSMUSG00000055333	Fat2	mmu:245827; Q3V1D4; Q5F226; Q69ZY7			0	0	2.235	1
19	High	Master Protein	O88507	Ciliary neurotrophic factor receptor subunit alpha [OS=Mus musculus]	0	49.656	24	7	36	7	372	40.8	6.83	79.5	7	signal transduction;other biological processes	non-structural extracellular;plasma membrane;other membranes	signal transduction activity or receptor binding;other molecular function	Pf00041	12804	ENSMUSG00000028444	Cntfr	mmu:12804; O88507; Q80T01	Delta-Notch signaling pathway; Adipogenesis genes	IL-6-type cytokine receptor ligand interactions	3	0	2.214	1
20	High	Master Protein	Q9Z2W9	Glutamate receptor 3 [OS=Mus musculus]	0	68.004	19	12	42	7	888	100.5	8.38	76.42	12	cell-cell signaling;transport;signal transduction;other biological processes	non-structural extracellular;plasma membrane;other membranes;other cell component	transporter activity;other molecular function	Pf00060, Pf01094, Pf10613	53623	ENSMUSG00000001986	Gria3	A2VDF4; mmu:53623; Q5DTJ0; Q9Z2W9		Trafficking of GluR2-containing AMPA receptors; Unblocking of NMDA receptors, glutamate binding and activation; Activation of AMPA receptors; Synaptic adhesion-like molecules	5	0	2.211	1
21	High	Master Protein	Q80TS3	Adhesion G protein-coupled receptor L3 [OS=Mus musculus]	0	30.223	7	9	16	9	1537	171	6.71	20.29	9	cell adhesion;cell organization and biogenesis;developmental processes;signal transduction;other biological processes	plasma membrane;other membranes;other cell component	other molecular function	Pf00002, Pf01825, Pf02140, Pf02191, Pf02354, Pf16489	319387	ENSMUSG00000037605	Adgrl3	mmu:319387; Q3UHI7; Q3UM79; Q504Z9; Q5HZJ6; Q80T56; Q80TS3	GPCRs, non-odorant ; GPCRs, class B secretin-like		2	0	2.195	1
22	High	Master Protein	B2RXS4	Plexin-B2 [OS=Mus musculus]	0	31.484	5	7	16	7	1842	206.1	5.87	33.27	7	cell adhesion;cell cycle OR cell proliferation;cell organization and biogenesis;developmental processes;signal transduction;other biological processes	plasma membrane;other membranes;other cell component	other molecular function	Pf01403, Pf01437, Pf01833, Pf08337, Pf17960, Pf20170	140570	ENSMUSG00000036606	Plxnb2	B2RXS4; mmu:140570; Q3UH76			0	0	2.162	1
23	High	Master Protein	Q9CS84	Neurexin-1 [OS=Mus musculus]	0	165.472	27	31	106	27	1514	166.1	6.09	199.5	31	cell adhesion;cell-cell signaling;cell organization and biogenesis;transport;developmental processes;signal transduction;other biological processes	plasma membrane;other membranes;ER/Golgi;nucleus;other cell component	signal transduction activity or receptor binding;other molecular function	Pf00008, Pf02210	18189	ENSMUSG00000024109	Nrxn1	G3UWZ9; O88722; Q80Y87; Q8CHE6; Q9CS84		Neurexins and neuroligins	1	4	2.094	1
24	High	Master Protein	Q9R171	Cerebellin-1 [OS=Mus musculus]	0	38.126	30	6	42	5	193	21.1	7.28	73.65	6	cell adhesion;cell organization and biogenesis;transport;developmental processes;other biological processes	non-structural extracellular;plasma membrane;other membranes;other cell component	other molecular function	Pf00386	12404	ENSMUSG00000031654	Cbln1	mmu:12404; P28655; Q9QVT5; Q9R171			0	1	2.082	1
25	High	Master Protein	Q9JHG0	Cerebellin-3 [OS=Mus musculus]	0	20.142	27	6	36	6	197	21.1	6.38	57.88	6	cell organization and biogenesis	non-structural extracellular;ER/Golgi;other cell component		Pf00386	56410	ENSMUSG00000040380	Cbln3	mmu:56410; Q9JHG0			0	0	2.072	1
26	High	Master Protein	Q99N28	Cell adhesion molecule 3 [OS=Mus musculus]	0	26.467	24	5	11	5	396	42.9	5.8	21.75	5	cell adhesion;other biological processes	plasma membrane;other membranes;other cell component	other molecular function	Pf07679, Pf08205, Pf13927	94332	ENSMUSG00000005338	Cadm3	mmu:94332; Q8BSQ8; Q8K1H8; Q99N28	Splicing factor NOVA regulated synaptic proteins	Nectin/Necl trans heterodimerization	3	0	2.061	1
27	High	Master Protein	P63056	Noelin-3 [OS=Mus musculus]	0	10.616	7	4	12	4	478	54.9	8.15	4.65	4	developmental processes;signal transduction	non-structural extracellular;plasma membrane;other membranes;ER/Golgi;other cell component		Pf02191, Pf12308	229759	ENSMUSG00000027965	Olfm3	mmu:229759; P63056; Q8BKV2; Q8BLL6; Q8QZW0; Q8R4K3; Q8R4K4			0	0	2.033	1	fold change >2
28	High	Master Protein	P13595	Neural cell adhesion molecule 1 [OS=Mus musculus]	0	65.488	15	13	42	13	1115	119.4	4.83	74.75	13	cell adhesion;cell organization and biogenesis;stress response;developmental processes;signal transduction;other biological processes	plasma membrane;other membranes;cytosol;other cell component	other molecular function	Pf00041, Pf07679, Pf13927	17967		Ncam1	mmu:17967; P13594; P13595; Q61949; Q61950; Q6LBU8; Q8BQ96; Q8C4B2; Q921P2; Q9R2A7		RAF/MAP kinase cascade; NCAM1 interactions; Signal transduction by L1	4	0	1.98	1
29	High	Master Protein	Q99PJ0	Neurotrimin [OS=Mus musculus]	0	65.762	34	9	68	9	344	38	7.81	146.12	9	cell adhesion;other biological processes	non-structural extracellular;plasma membrane;other membranes;other cell component		Pf07679, Pf13927		ENSMUSG00000059974	Ntm	Q99PJ0		Post-translational modification: synthesis of GPI-anchored proteins	1	0	1.96	1
30	High	Master Protein	P63080	Gamma-aminobutyric acid receptor subunit beta-3 [OS=Mus musculus]	0	42.166	19	8	26	8	473	54.1	9.1	54.48	8	cell-cell signaling;cell organization and biogenesis;transport;developmental processes;signal transduction;other biological processes	plasma membrane;other membranes;other cell component	transporter activity;other molecular function	Pf02931, Pf02932	14402	ENSMUSG00000033676	Gabrb3	mmu:14402; P15433; P63080; Q3UHR3		GABA receptor activation	1	0	1.948	1
31	High	Master Protein	Q60841	Reelin [OS=Mus musculus]	0	41.326	4	11	23	11	3461	387.2	5.73	25.18	11	cell adhesion;cell organization and biogenesis;protein metabolism;other metabolic processes;stress response;developmental processes;signal transduction;other biological processes	non-structural extracellular;extracellular matrix;plasma membrane;other membranes;other cell component	signal transduction activity or receptor binding;other molecular function	Pf02014, Pf18720	19699	ENSMUSG00000042453	Reln	E9PZ78; mmu:19699; Q60841; Q9CUA6	Focal adhesion: PI3K-Akt-mTOR signaling pathway; Focal adhesion	Reelin signalling pathway	3	0	1.924	1
32	High	Master Protein	Q9JMB8	Contactin-6 [OS=Mus musculus]	0	49.466	16	13	22	13	1028	113.7	6.64	32.98	13	cell adhesion;cell organization and biogenesis;developmental processes;signal transduction;other biological processes	plasma membrane;other membranes;other cell component	other molecular function	Pf00041, Pf07679, Pf13927	53870	ENSMUSG00000030092	Cntn6	mmu:53870; Q8C6X1; Q9JMB8			0	0	1.917	1
33	High	Master Protein	Q80YX1	Tenascin [OS=Mus musculus]	0	17.517	3	7	13	7	2110	231.7	4.89	8.04	7	cell adhesion;cell-cell signaling;cell organization and biogenesis;stress response;developmental processes;other biological processes	non-structural extracellular;extracellular matrix	other molecular function	Pf00041, Pf00147, Pf07974, Pf18720	21923	ENSMUSG00000028364	Tnc	mmu:21923; Q64706; Q80YX1; Q80YX2	Focal adhesion: PI3K-Akt-mTOR signaling pathway; Focal adhesion	Regulation of Insulin-like Growth Factor (IGF) transport and uptake by Insulin-like Growth Factor Binding Proteins (IGFBPs); Post-translational protein phosphorylation; ECM proteoglycans; Integrin cell surface interactions	6	0	1.914	1
34	High	Master Protein	Q91ZX7	Prolow-density lipoprotein receptor-related protein 1 [OS=Mus musculus]	0	65.898	4	16	29	16	4545	504.4	5.36	42.53	16	cell cycle OR cell proliferation;cell organization and biogenesis;other metabolic processes;stress response;transport;developmental processes;signal transduction;other biological processes	plasma membrane;other membranes;cytoskeleton;ER/Golgi;nucleus;other cytoplasmic organelle;other cell component	signal transduction activity or receptor binding;other molecular function	Pf00008, Pf00057, Pf00058, Pf07645, Pf12662, Pf14670, Pf16472	16971		Lrp1	mmu:16971; Q61291; Q91ZX7; Q920Y4	Statin pathway; Wnt signaling pathway	Retinoid metabolism and transport; Scavenging of heme from plasma	4	0	1.913	1
35	High	Master Protein	Q62443	Neuronal pentraxin-1 [OS=Mus musculus]	0	14.537	12	5	8	5	432	47.1	6.44	12.88	5	cell organization and biogenesis;transport;developmental processes;other biological processes	non-structural extracellular;plasma membrane;other membranes;mitochondrion;ER/Golgi;other cell component	other molecular function	Pf00354	18164	ENSMUSG00000025582	Nptx1	mmu:18164; Q62443			0	0	1.9	1
36	High	Master Protein	P62812	Gamma-aminobutyric acid receptor subunit alpha-1 [OS=Mus musculus]	0	12.648	9	5	13	5	455	51.7	9.31	5.2	5	cell-cell signaling;cell organization and biogenesis;transport;developmental processes;signal transduction;other biological processes	plasma membrane;other membranes;other cell component	transporter activity;other molecular function	Pf02931, Pf02932	14394	ENSMUSG00000010803	Gabra1	mmu:14394; P18504; P62812	Serotonin and anxiety	GABA receptor activation	2	0	1.875	1
37	High	Master Protein	Q9JIA1	Leucine-rich glioma-inactivated protein 1 [OS=Mus musculus]	0	21.549	12	7	18	7	557	63.6	8.02	21.02	7	cell organization and biogenesis;developmental processes;other biological processes	non-structural extracellular;ER/Golgi;other cell component	signal transduction activity or receptor binding	Pf03736, Pf13855	56839	ENSMUSG00000067242	Lgi1	A0A0G2JFT0; mmu:56839; Q9JIA1		LGI-ADAM interactions	1	0	1.851	1
38	High	Master Protein	Q64444	Carbonic anhydrase 4 [OS=Mus musculus]	0	58.643	38	9	64	9	305	34.3	8.21	124.26	9	transport;other biological processes	non-structural extracellular;plasma membrane;other membranes;cytosol;ER/Golgi;other cell component	other molecular function	Pf00194	12351	ENSMUSG00000000805	Ca4	mmu:12351; Q64444		Erythrocytes take up carbon dioxide and release oxygen; Erythrocytes take up oxygen and release carbon dioxide; Reversible hydration of carbon dioxide	3	0	1.849	1
39	High	Master Protein	Q61330	Contactin-2 [OS=Mus musculus]	0	22.906	8	8	16	8	1040	113.1	7.62	12.45	8	cell adhesion;cell organization and biogenesis;protein metabolism;other metabolic processes;transport;developmental processes;signal transduction;other biological processes	plasma membrane;other membranes;other cell component	other molecular function	Pf00041, Pf07679, Pf13927	21367	ENSMUSG00000053024	Cntn2	mmu:21367; Q61330; Q6NZJ4; Q7TSJ5			0	0	1.848	1
40	High	Master Protein	P11627	Neural cell adhesion molecule L1 [OS=Mus musculus]	0	35.854	11	9	19	9	1260	140.9	5.97	29.9	9	cell adhesion;cell organization and biogenesis;developmental processes;signal transduction;other biological processes	plasma membrane;other membranes;other cytoplasmic organelle;other cell component	signal transduction activity or receptor binding;other molecular function	Pf00041, Pf07679, Pf13882, Pf13927			L1cam	P11627		Interaction between L1 and Ankyrins; Recycling pathway of L1; Signal transduction by L1	4	0	1.834	1
41	High	Master Protein	Q9CPW0	Contactin-associated protein-like 2 [OS=Mus musculus]	0	134.042	26	24	93	24	1332	148.1	6.77	192.87	24	cell adhesion;cell-cell signaling;cell cycle OR cell proliferation;cell organization and biogenesis;other metabolic processes;stress response;developmental processes;signal transduction;other biological processes	plasma membrane;other membranes;ER/Golgi;other cytoplasmic organelle;other cell component	other molecular function	Pf00754, Pf02210	66797	ENSMUSG00000039419	Cntnap2	mmu:66797; Q6P2K4; Q6ZQ31; Q9CPW0			0	0	1.798	1
42	High	Master Protein	P05532	Mast/stem cell growth factor receptor Kit [OS=Mus musculus]	0	22.295	9	8	10	8	979	109.3	7.21	9.26	8	cell adhesion;cell cycle OR cell proliferation;cell organization and biogenesis;protein metabolism;other metabolic processes;stress response;transport;developmental processes;signal transduction;other biological processes	non-structural extracellular;plasma membrane;other membranes;nucleus;other cell component	kinase activity;other molecular function	Pf00047, Pf07714	16590	ENSMUSG00000005672	Kit	mmu:16590; P05532; Q61415; Q61416; Q61417; Q6LEE9; Q6QJB7; Q6QJB8; Q7TS86; Q8C8K9	Focal adhesion: PI3K-Akt-mTOR signaling pathway; Kit receptor signaling pathway	RAF/MAP kinase cascade; PIP3 activates AKT signaling; PI5P, PP2A and IER3 Regulate PI3K/AKT Signaling; Regulation of KIT signaling	7	0	1.792	1
43	High	Master Protein	Q810U4	Neuronal cell adhesion molecule [OS=Mus musculus]	0	41.462	11	11	26	11	1256	138.4	5.91	47.97	11	cell adhesion;cell organization and biogenesis;developmental processes;other biological processes	non-structural extracellular;plasma membrane;other membranes;other cell component	cytoskeletal activity;other molecular function	Pf00041, Pf07679, Pf13882, Pf13927	319504	ENSMUSG00000020598	Nrcam	mmu:319504; Q80U33; Q810U4; Q8BLG8; Q8BX92; Q8BYJ8			0	0	1.76	1
44	High	Master Protein	Q8K4Z0	Leucine-rich repeat LGI family member 2 [OS=Mus musculus]	0	17.498	9	7	13	7	550	63	6.54	9.38	7	cell organization and biogenesis;developmental processes			Pf03736, Pf13855	246316	ENSMUSG00000039252	Lgi2	mmu:246316; Q80T76; Q8K4Z0		LGI-ADAM interactions	1	0	1.674	1
45	High	Master Protein	P56564	Excitatory amino acid transporter 1 [OS=Mus musculus]	0	90.958	22	8	63	6	543	59.6	8.4	145.47	8	other metabolic processes;stress response;transport;developmental processes;other biological processes	plasma membrane;other membranes;mitochondrion;other cell component	transporter activity;other molecular function	Pf00375	20512	ENSMUSG00000005360	Slc1a3	mmu:20512; P56564; Q99P53		Glutamate Neurotransmitter Release Cycle; Transport of inorganic cations/anions and amino acids/oligopeptides; Astrocytic Glutamate-Glutamine Uptake And Metabolism	3	3	1.668	1
46	High	Master Protein	P04925	Major prion protein [OS=Mus musculus]	0	18.95	22	5	19	5	254	28	9.33	22.69	5	cell organization and biogenesis;other metabolic processes;stress response;signal transduction;other biological processes	plasma membrane;other membranes;cytosol;mitochondrion;ER/Golgi;nucleus;other cell component	signal transduction activity or receptor binding;enzyme regulator activity;cytoskeletal activity;other molecular function	Pf00377, Pf11587	19122	ENSMUSG00000079037	Prnp	mmu:19122; P04925		Insertion of tail-anchored proteins into the endoplasmic reticulum membrane	1	0	1.664	1
47	High	Master Protein	Q8C419	Probable G-protein coupled receptor 158 [OS=Mus musculus]	0	132.723	32	29	102	29	1200	134.3	8.09	190.2	29	signal transduction;other biological processes	plasma membrane;other membranes	other molecular function	Pf00003	241263	ENSMUSG00000045967	Gpr158	B1AWY4; mmu:241263; Q8C419; Q8CHB0	GPCRs, odorant		1	0	1.653	1
48	High	Master Protein	Q9QUR8	Semaphorin-7A [OS=Mus musculus]	0	18.317	9	5	9	5	664	74.9	7.74	6.27	5	cell organization and biogenesis;protein metabolism;other metabolic processes;stress response;developmental processes;signal transduction;other biological processes	plasma membrane;other membranes	signal transduction activity or receptor binding	Pf01403, Pf01437	20361	ENSMUSG00000038264	Sema7a	mmu:20361; O88371; Q9QUR8		Other semaphorin interactions	1	0	1.628	1
49	High	Master Protein	Q8BR86	Kin of IRRE-like protein 3 [OS=Mus musculus]	0	13.925	7	6	12	6	778	85.4	6.93	11.74	6	cell adhesion;cell organization and biogenesis;developmental processes;other biological processes	non-structural extracellular;plasma membrane;other membranes;ER/Golgi;other cell component	other molecular function	Pf07679, Pf13895, Pf13927	67703	ENSMUSG00000032036	Kirrel3	mmu:67703; Q6P555; Q810H3; Q8BGQ5; Q8BR86; Q8BRS8	Primary focal segmental glomerulosclerosis (FSGS)	Nephrin family interactions	2	0	1.598	1
50	High	Master Protein	Q9DB72	BTB/POZ domain-containing protein 17 [OS=Mus musculus]	0	100.739	43	14	53	14	478	52.6	9.42	138.33	14		non-structural extracellular		Pf00651, Pf07707	72014	ENSMUSG00000000202	Btbd17	mmu:72014; Q9DB72			0	0	1.585	1
51	High	Master Protein	P43406	Integrin alpha-V [OS=Mus musculus]	0	43.843	13	12	27	12	1044	115.3	5.63	48.09	12	cell adhesion;cell organization and biogenesis;other metabolic processes;stress response;transport;developmental processes;signal transduction;other biological processes	plasma membrane;other membranes;cytosol;other cell component	signal transduction activity or receptor binding;transporter activity;other molecular function	Pf00357, Pf01839, Pf08441	16410	ENSMUSG00000027087	Itgav	A2AKI6; mmu:16410; P43406	Primary focal segmental glomerulosclerosis (FSGS); Integrin-mediated cell adhesion	Neutrophil degranulation; Integrin cell surface interactions; ECM proteoglycans; Syndecan interactions; TGF-beta receptor signaling activates SMADs; Molecules associated with elastic fibres; Signal transduction by L1; VEGFA-VEGFR2 Pathway; PECAM1 interactions; Cross-presentation of particulate exogenous antigens (phagosomes)	13	0	1.582	1
52	High	Master Protein	P43006	Excitatory amino acid transporter 2 [OS=Mus musculus]	0	69.179	18	9	45	9	572	62	6.68	104.54	9	cell organization and biogenesis;other metabolic processes;stress response;transport;developmental processes;other biological processes	plasma membrane;other membranes;other cell component	transporter activity;other molecular function	Pf00375	20511	ENSMUSG00000005089	Slc1a2	mmu:20511; O35877; O54686; O54687; P43006	Oxidative stress and redox pathway	Glutamate Neurotransmitter Release Cycle; Transport of inorganic cations/anions and amino acids/oligopeptides; Astrocytic Glutamate-Glutamine Uptake And Metabolism	4	0	1.575	1
53	High	Master Protein	P16305	Gamma-aminobutyric acid receptor subunit alpha-6 [OS=Mus musculus]	0	26.314	19	7	17	7	453	51.1	8.07	25.92	7	cell-cell signaling;transport;signal transduction;other biological processes	plasma membrane;other membranes;other cell component	transporter activity;other molecular function	Pf02931, Pf02932	14399	ENSMUSG00000020428	Gabra6	mmu:14399; P16305; Q5SUU5; Q9R0V3; Q9R0V4; Q9R0V5		GABA receptor activation	1	0	1.57	1
54	High	Master Protein	Q8BYI9	Tenascin-R [OS=Mus musculus]	0	239.877	36	34	143	34	1358	149.5	4.94	388.9	34	cell adhesion;cell-cell signaling;cell organization and biogenesis;stress response;developmental processes;other biological processes	non-structural extracellular;extracellular matrix;other membranes;other cell component	signal transduction activity or receptor binding;other molecular function	Pf00041, Pf00147, Pf18720	21960	ENSMUSG00000015829	Tnr	A2RT70; mmu:21960; O88717; Q8BYI9	Focal adhesion: PI3K-Akt-mTOR signaling pathway; Focal adhesion	ECM proteoglycans	3	0	1.547	1
55	High	Master Protein	P02468	Laminin subunit gamma-1 [OS=Mus musculus]	0	7.625	3	4	4	4	1607	177.2	5.21	0	4	cell adhesion;cell cycle OR cell proliferation;cell organization and biogenesis;other metabolic processes;developmental processes;other biological processes	non-structural extracellular;extracellular matrix;other cell component	extracellular structural activity;other molecular function	Pf00052, Pf00053, Pf00055			Lamc1	P02468			0	0	1.523	1
56	High	Master Protein	Q6PIE5	Sodium/potassium-transporting ATPase subunit alpha-2 [OS=Mus musculus]	0	119.926	29	26	93	10	1020	112.1	5.55	167.22	26	other metabolic processes;stress response;transport;developmental processes;other biological processes	plasma membrane;other membranes;other cytoplasmic organelle;other cell component	transporter activity;other molecular function	Pf00122, Pf00689, Pf00690, Pf00702, Pf13246	98660	ENSMUSG00000007097	Atp1a2	mmu:98660; Q6PIE5; Q80UZ8		Ion homeostasis; Ion transport by P-type ATPases	2	1	1.497	1
57	High	Master Protein	P06802	Ectonucleotide pyrophosphatase/phosphodiesterase family member 1 [OS=Mus musculus]	0	30.865	11	10	29	10	906	103.1	6.6	27.78	10	cell-cell signaling;cell cycle OR cell proliferation;cell organization and biogenesis;protein metabolism;RNA metabolism OR transcription;other metabolic processes;stress response;transport;developmental processes;signal transduction;other biological processes	non-structural extracellular;plasma membrane;other membranes;other cell component	signal transduction activity or receptor binding;nucleic acid binding activity;other molecular function	Pf01033, Pf01223, Pf01663	18605		Enpp1	mmu:18605; P06802; Q542E9; Q924C4	Endochondral ossification; Insulin signaling	Vitamin B2 (riboflavin) metabolism	3	0	1.495	1
58	High	Master Protein	P08249	Malate dehydrogenase, mitochondrial [OS=Mus musculus]	0	24.713	23	6	8	6	338	35.6	8.68	13.42	6	other metabolic processes	other membranes;mitochondrion;other cell component	other molecular function	Pf00056, Pf02866	17448	ENSMUSG00000019179	Mdh2	mmu:17448; P08249; Q0QF44; Q8CF79; Q8R1P0	Glycolysis and gluconeogenesis; TCA cycle	Gluconeogenesis; Citric acid cycle (TCA cycle)	4	0	1.486	1
59	High	Master Protein	Q640R3	Hepatocyte cell adhesion molecule [OS=Mus musculus]	0	15.678	16	4	9	4	418	46.3	9.42	7.33	4	cell adhesion;cell cycle OR cell proliferation;other biological processes	other membranes;other cell component		Pf07686, Pf13927	72927	ENSMUSG00000046240	Hepacam	mmu:72927; Q640R3			0	0	1.461	1
60	High	Master Protein	P48302	Endothelin receptor type B [OS=Mus musculus]	0	12.157	9	4	9	4	442	49.5	9.28	6.53	4	cell-cell signaling;other metabolic processes;stress response;transport;developmental processes;signal transduction;other biological processes	plasma membrane;other membranes;nucleus	signal transduction activity or receptor binding;other molecular function	Pf00001	13618	ENSMUSG00000022122	Ednrb	mmu:13618; P48302; Q542M3	GPCRs, non-odorant ; GPCRs, class A rhodopsin-like; GPCRs, peptide; Prostaglandin synthesis and regulation	G alpha (q) signalling events; Peptide ligand-binding receptors	6	0	1.456	1
61	High	Master Protein	Q91V14	Solute carrier family 12 member 5 [OS=Mus musculus]	0	13.474	4	4	6	4	1138	126.2	6.74	5.77	4	cell-cell signaling;cell organization and biogenesis;stress response;transport;developmental processes;other biological processes	plasma membrane;other membranes;other cell component	transporter activity;other molecular function	Pf00324, Pf03522	57138	ENSMUSG00000017740	Slc12a5	A2A5L0; mmu:57138; Q3UHQ2; Q7TQC9; Q80TI5; Q91V14; Q9Z0M7		Cation-coupled Chloride cotransporters	1	0	1.452	1
62	High	Master Protein	P07901	Heat shock protein HSP 90-alpha [OS=Mus musculus]	0	17.245	9	6	9	4	733	84.7	5.01	5.85	6	cell organization and biogenesis;DNA metabolism;other metabolic processes;stress response;transport;developmental processes;other biological processes	extracellular matrix;plasma membrane;other membranes;cytosol;cytoskeleton;mitochondrion;nucleus;other cell component	signal transduction activity or receptor binding;enzyme regulator activity;cytoskeletal activity;nucleic acid binding activity;other molecular function	Pf00183, Pf02518	15519	ENSMUSG00000021270	Hsp90aa1	mmu:15519; P07901	EBV LMP1 signaling; Focal adhesion: PI3K-Akt-mTOR signaling pathway; IL-6 signaling pathway; IL-2 signaling pathway	Regulation of actin dynamics for phagocytic cup formation; Recruitment of NuMA to mitotic centrosomes; HSP90 chaperone cycle for steroid hormone receptors (SHR) in the presence of ligand; The role of GTSE1 in G2/M progression after G2 checkpoint; Neutrophil degranulation; Downregulation of ERBB2 signaling; Anchoring of the basal body to the plasma membrane; Regulation of PLK1 Activity at G2/M Tra…	32	2	1.445	1
63	High	Master Protein	P29533	Vascular cell adhesion protein 1 [OS=Mus musculus]	0	13.31	6	5	9	5	739	81.3	5.3	5.73	5	cell adhesion;other metabolic processes;developmental processes;signal transduction;other biological processes	non-structural extracellular;plasma membrane;other membranes;cytoskeleton;ER/Golgi;other cytoplasmic organelle;other cell component	signal transduction activity or receptor binding;other molecular function	Pf00047, Pf05790, Pf07679, Pf13927		ENSMUSG00000027962	Vcam1	P29533		Immunoregulatory interactions between a Lymphoid and a non-Lymphoid cell; Integrin cell surface interactions	2	0	1.442	1
64	High	Master Protein	Q60931	Voltage-dependent anion-selective channel protein 3 [OS=Mus musculus]	0	24.578	22	5	18	4	283	30.7	8.79	43.89	5	cell-cell signaling;cell organization and biogenesis;stress response;transport;other biological processes	other membranes;mitochondrion;ER/Golgi	transporter activity;other molecular function	Pf01459	22335	ENSMUSG00000008892	Vdac3	mmu:22335; Q60931; Q8BNG2		Ub-specific processing proteases	1	0	1.439	1
65	High	Master Protein	P05063	Fructose-bisphosphate aldolase C [OS=Mus musculus]	0	25.294	19	7	15	6	363	39.4	7.12	28.01	7	other metabolic processes;other biological processes	cytosol;other cell component	cytoskeletal activity;other molecular function	Pf00274	11676	ENSMUSG00000017390	Aldoc	mmu:11676; P05063; Q64011; Q8CA91; Q99K96; Q9DBA4; Q9JK32	Glycolysis and gluconeogenesis	Neutrophil degranulation; Gluconeogenesis; Glycolysis	4	1	1.42	1
66	High	Master Protein	P07309	Transthyretin [OS=Mus musculus]	0	25.869	46	5	18	5	147	15.8	6.16	38.37	5	other metabolic processes;signal transduction	non-structural extracellular;other cell component	signal transduction activity or receptor binding;other molecular function	Pf00576	22139	ENSMUSG00000061808	Ttr	mmu:22139; P07309		Neutrophil degranulation; Retinoid metabolism and transport; The canonical retinoid cycle in rods (twilight vision)	3	0	1.415	1
67	High	Master Protein	B9EKR1	Receptor-type tyrosine-protein phosphatase zeta [OS=Mus musculus]	0	59.556	6	11	57	11	2312	254.2	4.88	99.53	11	cell organization and biogenesis;protein metabolism;other metabolic processes;developmental processes;other biological processes	non-structural extracellular;extracellular matrix;plasma membrane;other membranes;other cell component	signal transduction activity or receptor binding;other molecular function	Pf00041, Pf00102, Pf00194	19283	ENSMUSG00000068748	Ptprz1	B9EKR1; mmu:19283	Spinal cord injury	Signaling by ALK; Other interleukin signaling	3	0	1.413	1
68	High	Master Protein	Q8VDN2	Sodium/potassium-transporting ATPase subunit alpha-1 [OS=Mus musculus]	0	105.389	24	21	79	8	1023	112.9	5.45	150.86	21	transport;other biological processes	plasma membrane;other membranes;cytoskeleton;ER/Golgi;other cytoplasmic organelle;other cell component	transporter activity;cytoskeletal activity;other molecular function	Pf00122, Pf00689, Pf00690, Pf00702, Pf13246	11928	ENSMUSG00000033161	Atp1a1	mmu:11928; Q8VDN2; Q91Z09		Ion homeostasis; Ion transport by P-type ATPases	2	0	1.408	1
69	High	Master Protein	Q99P47	Contactin-associated protein-like 4 [OS=Mus musculus]	0	22.924	6	8	16	8	1310	144.6	7.06	18.27	8	cell adhesion;cell cycle OR cell proliferation;developmental processes;other biological processes	plasma membrane;other membranes;other cell component	other molecular function	Pf00754, Pf02210	170571	ENSMUSG00000031772	Cntnap4	mmu:170571; Q8K002; Q99P47			0	0	1.403	1
70	High	Master Protein	P63017	Heat shock cognate 71 kDa protein [OS=Mus musculus]	0	12.997	9	5	9	5	646	70.8	5.52	15.87	5	cell cycle OR cell proliferation;cell organization and biogenesis;protein metabolism;RNA metabolism OR transcription;other metabolic processes;stress response;transport;developmental processes;other biological processes	non-structural extracellular;plasma membrane;other membranes;cytosol;cytoskeleton;ER/Golgi;nucleus;other cytoplasmic organelle;other cell component	signal transduction activity or receptor binding;nucleic acid binding activity;other molecular function	Pf00012	15481	ENSMUSG00000015656	Hspa8	mmu:15481; P08109; P12225; P63017; Q3U6R0; Q3U764; Q3U7D7; Q3U7E2; Q3U9B4; Q3U9G0; Q3UGM0; Q5FWJ6; Q62373; Q62374; Q62375; Q6NZD0	Mapk signaling pathway; Exercise-induced circadian regulation	mRNA Splicing - Major Pathway; Neutrophil degranulation; Clathrin-mediated endocytosis; AUF1 (hnRNP D0) binds and destabilizes mRNA; Regulation of HSF1-mediated heat shock response; HSP90 chaperone cycle for steroid hormone receptors (SHR) in the presence of ligand; Golgi Associated Vesicle Biogenesis; Attenuation phase; Lysosome Vesicle Biogenesis; GABA synthesis, release, reuptake and degradati…	14	0	1.4	1
71	High	Master Protein	Q61292	Laminin subunit beta-2 [OS=Mus musculus]	0	25.432	5	8	22	8	1799	196.5	6.67	14.67	8	cell adhesion;cell organization and biogenesis;stress response;developmental processes;other biological processes	non-structural extracellular;extracellular matrix;other cell component	signal transduction activity or receptor binding;extracellular structural activity	Pf00053, Pf00055	16779	ENSMUSG00000052911	Lamb2	mmu:16779; Q61292; Q62182; Q8R0Y0	Primary focal segmental glomerulosclerosis (FSGS); Focal adhesion: PI3K-Akt-mTOR signaling pathway; Inflammatory response pathway; Alpha 6 beta 4 integrin signaling pathway; Focal adhesion		5	0	1.398	1
72	High	Master Protein	P63001	Ras-related C3 botulinum toxin substrate 1 [OS=Mus musculus]	0	19.468	31	5	18	4	192	21.4	8.5	31.26	5	cell adhesion;cell-cell signaling;cell cycle OR cell proliferation;cell organization and biogenesis;stress response;transport;developmental processes;signal transduction;other biological processes	plasma membrane;other membranes;cytosol;cytoskeleton;ER/Golgi;nucleus;other cytoplasmic organelle;other cell component	other molecular function	Pf00071	19353	ENSMUSG00000001847	Rac1	mmu:19353; O95501; P15154; P63001; Q9BTB4	IL-5 signaling pathway; MicroRNAs in cardiomyocyte hypertrophy; BDNF pathway; Chemokine signaling pathway; G13 signaling pathway; p38 Mapk signaling pathway; Microglia pathogen phagocytosis pathway; IL-3 signaling pathway; Robo4 and VEGF signaling pathways crosstalk; IL-6 signaling pathway; Wnt signaling pathway; Oxidative stress and redox pathway; Alpha 6 beta 4 integrin signaling pathway; Mapk …	MAPK6/MAPK4 signaling; Regulation of actin dynamics for phagocytic cup formation; FCERI mediated MAPK activation; Neutrophil degranulation; PIP3 activates AKT signaling; PI5P, PP2A and IER3 Regulate PI3K/AKT Signaling; Signaling by SCF-KIT; GPVI-mediated activation cascade; Signal transduction by L1; NTRK2 activates RAC1; RAC1 GTPase cycle; NRAGE signals death through JNK; Factors involved in meg…	57	0	1.375	1
73	High	Master Protein	P12960	Contactin-1 [OS=Mus musculus]	0	293.859	46	38	253	38	1020	113.3	6.16	560.19	38	cell adhesion;cell organization and biogenesis;other metabolic processes;developmental processes;signal transduction;other biological processes	plasma membrane;other membranes;other cell component	other molecular function	Pf00041, Pf00047, Pf07679, Pf13927	12805	ENSMUSG00000055022	Cntn1	mmu:12805; P12960; Q6NXV7; Q8BR42; Q8C6A0	Delta-Notch signaling pathway		1	0	1.373	1
74	High	Master Protein	Q9D023	Mitochondrial pyruvate carrier 2 [OS=Mus musculus]	0	12.589	25	4	12	4	127	14.3	10.61	7.38	4	other metabolic processes;transport;other biological processes	other membranes;mitochondrion	transporter activity;other molecular function	Pf03650	70456	ENSMUSG00000026568	Mpc2	mmu:70456; Q3UA44; Q9D023	Glycolysis and gluconeogenesis		1	0	1.371	1
75	High	Master Protein	P11881	Inositol 1,4,5-trisphosphate receptor type 1 [OS=Mus musculus]	0	18.626	3	7	12	7	2749	313	6.04	0	7	cell-cell signaling;stress response;transport;developmental processes;signal transduction;other biological processes	plasma membrane;other membranes;cytosol;ER/Golgi;nucleus;other cell component	transporter activity;other molecular function	Pf00520, Pf01365, Pf02815, Pf08454, Pf08709	16438	ENSMUSG00000030102	Itpr1	mmu:16438; P11881; P20943; Q99LG5	Alzheimer's disease; G protein signaling pathways; Myometrial relaxation and contraction pathways; Calcium regulation in cardiac cells	Antigen activates B Cell Receptor (BCR) leading to generation of second messengers; Ion homeostasis; Effects of PIP2 hydrolysis; Glucagon-like Peptide-1 (GLP1) regulates insulin secretion; Elevation of cytosolic Ca2+ levels; cGMP effects	10	0	1.357	1
76	High	Master Protein	P39053	Dynamin-1 [OS=Mus musculus]	0	16.29	6	6	18	6	867	97.7	7.74	10.16	6	cell organization and biogenesis;transport;other biological processes	plasma membrane;other membranes;cytoskeleton;ER/Golgi;other cell component	signal transduction activity or receptor binding;cytoskeletal activity;other molecular function	Pf00169, Pf00350, Pf01031, Pf02212	13429	ENSMUSG00000026825	Dnm1	A2AN50; A2AN51; A2AN54; A2AN55; mmu:13429; P39053; Q3UNM1; Q5DTN7; Q61358; Q61359; Q61360; Q6PDM5; Q8JZZ4; Q9CSY7; Q9QXX1	One-carbon metabolism and related pathways; Primary focal segmental glomerulosclerosis (FSGS); IL-3 signaling pathway; EGFR1 signaling pathway	MHC class II antigen presentation; Recycling pathway of L1; Clathrin-mediated endocytosis; Formation of annular gap junctions; Toll Like Receptor 4 (TLR4) Cascade	10	0	1.355	1
77	High	Master Protein	P01942	Hemoglobin subunit alpha [OS=Mus musculus]	0	16.744	33	4	15	4	142	15.1	8.22	27.23	4	other metabolic processes;transport;developmental processes;other biological processes	non-structural extracellular;cytosol;other cell component	signal transduction activity or receptor binding;other molecular function	Pf00042			Hba	P01942		Scavenging of heme from plasma; Erythrocytes take up carbon dioxide and release oxygen; Erythrocytes take up oxygen and release carbon dioxide; Cytoprotection by HMOX1; Heme signaling	5	0	1.35	1
78	High	Master Protein	O09114	Prostaglandin-H2 D-isomerase [OS=Mus musculus]	0	18.026	21	4	24	4	189	21.1	8.25	35.81	4	other metabolic processes;transport;other biological processes	non-structural extracellular;other membranes;ER/Golgi;nucleus;other cell component	other molecular function	Pf00061	19215	ENSMUSG00000015090	Ptgds	mmu:19215; O09114; O09157; O35091; Q3V2G5; Q62169	Selenium micronutrient network; Folic acid network; Eicosanoid synthesis; Prostaglandin synthesis and regulation; Eicosanoid metabolism via cyclooxygenases (COX)	Synthesis of Prostaglandins (PG) and Thromboxanes (TX)	6	0	1.35	1
79	High	Master Protein	O54991	Contactin-associated protein 1 [OS=Mus musculus]	0	149.962	28	32	125	32	1385	156.2	7.06	227.75	32	cell adhesion;cell organization and biogenesis;developmental processes;other biological processes	plasma membrane;other membranes;other cell component	other molecular function	Pf00754, Pf02210	53321	ENSMUSG00000017167	Cntnap1	A2A4K6; mmu:53321; O54991			0	0	1.35	1
80	High	Master Protein	Q9JIS5	Synaptic vesicle glycoprotein 2A [OS=Mus musculus]	0	13.315	6	4	10	4	742	82.6	5.57	6.95	4	cell-cell signaling;cell organization and biogenesis;transport;other biological processes	other membranes;ER/Golgi;other cell component	transporter activity;other molecular function	Pf00083, Pf07690	64051	ENSMUSG00000038486	Sv2a	mmu:64051; Q80TT0; Q8R0R5; Q9JIS5			0	0	1.349	1
81	High	Master Protein	P16858	Glyceraldehyde-3-phosphate dehydrogenase [OS=Mus musculus]	0	100.837	43	9	63	9	333	35.8	8.25	199.42	9	cell organization and biogenesis;protein metabolism;other metabolic processes;stress response;signal transduction;other biological processes	plasma membrane;other membranes;cytosol;cytoskeleton;nucleus;other cytoplasmic organelle;other cell component	enzyme regulator activity;cytoskeletal activity;other molecular function	Pf00044, Pf02800	14433	ENSMUSG00000057666	Gapdh	A6H6A8; mmu:14433; P16858; Q0QEU0; Q3THM2; Q3TUI2; Q3UMT2; Q4V783; Q569X2; Q569X5; Q5U410	Glycolysis and gluconeogenesis	Gluconeogenesis; Glycolysis	3	0	1.334	1
82	High	Master Protein	Q60930	Voltage-dependent anion-selective channel protein 2 [OS=Mus musculus]	0	32.212	38	8	30	8	295	31.7	7.49	63.41	8	cell organization and biogenesis;transport;signal transduction;other biological processes	other membranes;cytoskeleton;mitochondrion;ER/Golgi;other cell component	transporter activity;other molecular function	Pf01459	22334	ENSMUSG00000021771	Vdac2	mmu:22334; Q60930; Q78MH6; Q99L98		Ub-specific processing proteases	1	0	1.332	1
83	High	Master Protein	P05064	Fructose-bisphosphate aldolase A [OS=Mus musculus]	0	18.698	17	5	14	4	364	39.3	8.09	26.78	5	cell organization and biogenesis;other metabolic processes;other biological processes	non-structural extracellular;plasma membrane;other membranes;cytosol;cytoskeleton;mitochondrion;other cell component	cytoskeletal activity;other molecular function	Pf00274	11674	ENSMUSG00000030695	Aldoa	mmu:11674; P05064	Glycolysis and gluconeogenesis	Neutrophil degranulation; Platelet degranulation ; Gluconeogenesis; Glycolysis	5	0	1.331	1
84	High	Master Protein	P17182	Alpha-enolase [OS=Mus musculus]	0	18.288	13	5	12	5	434	47.1	6.8	13.45	5	RNA metabolism OR transcription;other metabolic processes;developmental processes;other biological processes	plasma membrane;other membranes;cytosol;nucleus;other cell component	nucleic acid binding activity;other molecular function	Pf00113, Pf03952	13806; 433182	ENSMUSG00000059040; ENSMUSG00000063524	Eno1	mmu:13806; mmu:433182; P17182; Q99KT7; Q9DCY7	Glycolysis and gluconeogenesis	Gluconeogenesis; Glycolysis	3	0	1.331	1
85	High	Master Protein	P16330	2',3'-cyclic-nucleotide 3'-phosphodiesterase [OS=Mus musculus]	0	97.067	50	19	84	19	420	47.1	8.97	186.06	19	cell organization and biogenesis;other metabolic processes;transport;developmental processes;other biological processes	non-structural extracellular;plasma membrane;other membranes;cytoskeleton;mitochondrion;other cell component	nucleic acid binding activity;other molecular function	Pf05881, Pf13671	12799	ENSMUSG00000006782	Cnp	mmu:12799; P16330; Q61424; Q8C7C9; Q91V42; Q923F3			0	0	1.323	1
86	High	Master Protein	Q3TXX4	Vesicular glutamate transporter 1 [OS=Mus musculus]	0	19.633	9	5	20	5	560	61.6	7.34	12.55	5	cell-cell signaling;cell organization and biogenesis;transport;signal transduction;other biological processes	plasma membrane;other membranes;ER/Golgi;other cell component	transporter activity	Pf07690	72961	ENSMUSG00000070570	Slc17a7	E9QMT8; mmu:72961; Q3TXX4		Glutamate Neurotransmitter Release Cycle; Organic anion transporters	2	0	1.317	1
87	High	Master Protein	O08599	Syntaxin-binding protein 1 [OS=Mus musculus]	0	67.818	27	13	48	13	594	67.5	6.96	93.72	13	cell adhesion;cell-cell signaling;cell organization and biogenesis;stress response;transport;developmental processes;other biological processes	plasma membrane;other membranes;cytosol;cytoskeleton;nucleus;other cell component	other molecular function	Pf00995	20910	ENSMUSG00000026797	Stxbp1	A2ARS2; A2ARS3; A2ARS4; mmu:20910; O08599; Q5WAC6; Q8VD51	EGFR1 signaling pathway; Insulin signaling	Dopamine Neurotransmitter Release Cycle; Serotonin Neurotransmitter Release Cycle; Norepinephrine Neurotransmitter Release Cycle; Glutamate Neurotransmitter Release Cycle; Acetylcholine Neurotransmitter Release Cycle; GABA synthesis, release, reuptake and degradation	8	0	1.313	1
88	High	Master Protein	Q810U3	Neurofascin [OS=Mus musculus]	0	33.893	9	10	21	10	1240	137.9	6.19	34.21	10	cell adhesion;cell organization and biogenesis;developmental processes;other biological processes	plasma membrane;other membranes;other cell component	other molecular function	Pf00041, Pf00047, Pf07679, Pf13882, Pf13927	269116	ENSMUSG00000026442	Nfasc	mmu:269116; Q810U3		Neutrophil degranulation; Neurofascin interactions	2	0	1.302	1
89	High	Master Protein	P02301	Histone H3.3C [OS=Mus musculus]	0	8.217	22	4	24	4	136	15.3	11.14	9.95	4	cell organization and biogenesis	nucleus;other cell component	nucleic acid binding activity;other molecular function	Pf00125			H3-5	P02301			0	0	1.295	1
90	High	Master Protein	P63011	Ras-related protein Rab-3A [OS=Mus musculus]	0	46.934	53	9	42	7	220	25	5.03	87.53	9	cell-cell signaling;cell organization and biogenesis;stress response;transport;developmental processes;other biological processes	plasma membrane;other membranes;cytosol;ER/Golgi;other cytoplasmic organelle;other cell component	cytoskeletal activity;other molecular function	Pf00071	19339	ENSMUSG00000031840	Rab3a	mmu:19339; P05713; P63011; Q3TSL4		Dopamine Neurotransmitter Release Cycle; Serotonin Neurotransmitter Release Cycle; Norepinephrine Neurotransmitter Release Cycle; Glutamate Neurotransmitter Release Cycle; Acetylcholine Neurotransmitter Release Cycle; GABA synthesis, release, reuptake and degradation; Neutrophil degranulation; RAB GEFs exchange GTP for GDP on RABs; RAB geranylgeranylation	9	2	1.284	1
91	High	Master Protein	O55143	Sarcoplasmic/endoplasmic reticulum calcium ATPase 2 [OS=Mus musculus]	0	34.136	12	10	22	10	1044	114.8	5.34	26.92	10	cell organization and biogenesis;other metabolic processes;stress response;transport;signal transduction;other biological processes	plasma membrane;other membranes;cytosol;ER/Golgi;other cell component	signal transduction activity or receptor binding;transporter activity;other molecular function	Pf00122, Pf00689, Pf00690, Pf08282, Pf13246	11938	ENSMUSG00000029467	Atp2a2	mmu:11938; O55143; Q9R2A9; Q9WUT5	Alzheimer's disease; Myometrial relaxation and contraction pathways; Calcium regulation in cardiac cells	Ion homeostasis; Ion transport by P-type ATPases; Reduction of cytosolic Ca++ levels	6	0	1.278	1
92	High	Master Protein	Q06890	Clusterin [OS=Mus musculus]	0	13.699	10	4	10	4	448	51.6	5.67	7.26	4	cell cycle OR cell proliferation;cell organization and biogenesis;protein metabolism;other metabolic processes;stress response;transport;developmental processes;signal transduction;other biological processes	non-structural extracellular;other membranes;cytosol;cytoskeleton;mitochondrion;ER/Golgi;nucleus;other cell component	signal transduction activity or receptor binding;cytoskeletal activity;other molecular function	Pf01093	12759	ENSMUSG00000022037	Clu	mmu:12759; Q06890		Regulation of Complement cascade; Platelet degranulation ; Antimicrobial peptides; Terminal pathway of complement	4	0	1.271	1
93	High	Master Protein	P62827	GTP-binding nuclear protein Ran [OS=Mus musculus]	0	17.904	25	5	16	5	216	24.4	7.49	30.13	5	cell cycle OR cell proliferation;cell organization and biogenesis;other metabolic processes;transport;developmental processes;other biological processes	cytosol;cytoskeleton;nucleus;other cytoplasmic organelle;other cell component	nucleic acid binding activity;other molecular function	Pf00071	19384	ENSMUSG00000029430	Ran	mmu:19384; P17080; P28746; P28747; P62827; Q3U954; Q811M2; Q86V08; Q9CSP3; Q9CWI7; Q9CZA2; Q9UDJ5; Q9UEU9		Transcriptional regulation by small RNAs; Postmitotic nuclear pore complex (NPC) reformation; Regulation of cholesterol biosynthesis by SREBP (SREBF)	3	0	1.247	1
94	High	Master Protein	Q8VEK3	Heterogeneous nuclear ribonucleoprotein U [OS=Mus musculus]	0	22.464	9	6	15	6	800	87.9	6.24	13.41	6	cell cycle OR cell proliferation;cell organization and biogenesis;RNA metabolism OR transcription;other metabolic processes;transport;developmental processes;other biological processes	cytosol;cytoskeleton;nucleus;other cell component	cytoskeletal activity;nucleic acid binding activity;other molecular function	Pf00622, Pf02037, Pf13671	51810	ENSMUSG00000039630	Hnrnpu	G3XA10; mmu:51810; Q8VEK3; Q9R205	Mechanisms associated with pluripotency; mRNA processing	mRNA Splicing - Major Pathway; Processing of Capped Intron-Containing Pre-mRNA	4	0	1.247	1
95	High	Master Protein	P04370	Myelin basic protein [OS=Mus musculus]	0	17.443	18	4	18	4	250	27.2	9.58	33.75	4	cell organization and biogenesis;developmental processes;signal transduction;other biological processes	plasma membrane;other membranes;nucleus;other cell component	other molecular function	Pf01669	17196	ENSMUSG00000041607	Mbp	mmu:17196; P04370; Q01585; Q03139; Q03176; Q61836; Q61837; Q99KE4; Q9QWP1	Neural crest differentiation; Spinal cord injury; Mapk cascade		3	0	1.244	1
96	High	Master Protein	P97427	Dihydropyrimidinase-related protein 1 [OS=Mus musculus]	0	19.775	14	6	10	5	572	62.1	7.12	11.43	6	signal transduction;other biological processes	cytosol;cytoskeleton;nucleus;other cell component	cytoskeletal activity;other molecular function	Pf01979	12933	ENSMUSG00000029121	Crmp1	mmu:12933; O08554; O35097; P97427		CRMPs in Sema3A signaling	1	1	1.239	1
97	High	Master Protein	P16125	L-lactate dehydrogenase B chain [OS=Mus musculus]	0	27.517	19	6	20	5	334	36.5	6.05	37.14	6	other metabolic processes	other membranes;cytosol;mitochondrion;other cell component	other molecular function	Pf00056, Pf02866	16832	ENSMUSG00000030246	Ldhb	mmu:16832; P16125; Q545Y4	Glycolysis and gluconeogenesis	Pyruvate metabolism	2	1	1.239	1
98	High	Master Protein	P52480	Pyruvate kinase PKM [OS=Mus musculus]	0	55.594	29	12	34	12	531	57.8	7.47	65.65	12	cell organization and biogenesis;RNA metabolism OR transcription;other metabolic processes;developmental processes;other biological processes	cytosol;ER/Golgi;nucleus;other cell component	nucleic acid binding activity;kinase activity;other molecular function	Pf00224, Pf02887	18746	ENSMUSG00000032294	Pkm	mmu:18746; P52480; Q3TBV8; Q3TBW5; Q3TC59; Q3U1X3; Q3U5P6; Q4VC20; Q64484; Q91YI8; Q9CWB1	Glycolysis and gluconeogenesis; Purine metabolism	Neutrophil degranulation; Glycolysis	4	0	1.237	1
99	High	Master Protein	P14094	Sodium/potassium-transporting ATPase subunit beta-1 [OS=Mus musculus]	0	20.12	25	7	15	7	304	35.2	8.65	14.77	7	cell adhesion;other metabolic processes;stress response;transport;signal transduction;other biological processes	plasma membrane;other membranes;cytoskeleton;other cell component	transporter activity;other molecular function	Pf00287	11931	ENSMUSG00000026576	Atp1b1	mmu:11931; P14094	Calcium regulation in cardiac cells	Ion homeostasis; Ion transport by P-type ATPases	3	0	1.231	1
100	High	Master Protein	P48962	ADP/ATP translocase 1 [OS=Mus musculus]	0	78.822	48	17	85	9	298	32.9	9.72	174.04	17	cell organization and biogenesis;other metabolic processes;transport;other biological processes	other membranes;mitochondrion	transporter activity;other molecular function	Pf00153	11739	ENSMUSG00000031633	Slc25a4	mmu:11739; P48962; Q62164	Electron transport chain; mRNA processing	Transport of nucleosides and free purine and pyrimidine bases across the plasma membrane	3	10	1.223	1
101	High	Master Protein	Q99KI0	Aconitate hydratase, mitochondrial [OS=Mus musculus]	0	9.995	6	5	11	5	780	85.4	7.93	5.28	5	other metabolic processes;stress response;developmental processes	cytosol;mitochondrion	other molecular function	Pf00330, Pf00694	11429	ENSMUSG00000022477	Aco2	mmu:11429; Q3UDK9; Q3ULG9; Q3UNH7; Q505P4; Q99KI0	TCA cycle	Citric acid cycle (TCA cycle)	2	0	1.218	1
102	High	Master Protein	Q62059	Versican core protein [OS=Mus musculus]	0	52.698	4	10	36	10	3357	366.6	4.64	73.58	10	cell adhesion;developmental processes;other biological processes	non-structural extracellular;extracellular matrix;other cell component	other molecular function	Pf00008, Pf00059, Pf00084, Pf00193, Pf07686			Vcan	Q62058; Q62059; Q9CUU0		Regulation of Insulin-like Growth Factor (IGF) transport and uptake by Insulin-like Growth Factor Binding Proteins (IGFBPs); Post-translational protein phosphorylation; ECM proteoglycans; A tetrasaccharide linker sequence is required for GAG synthesis; Chondroitin sulfate biosynthesis; CS/DS degradation; Dermatan sulfate biosynthesis	7	0	1.218	1
103	High	Master Protein	P14231	Sodium/potassium-transporting ATPase subunit beta-2 [OS=Mus musculus]	0	22.285	17	4	17	4	290	33.3	8.31	40.07	4	cell adhesion;cell organization and biogenesis;transport;developmental processes;other biological processes	plasma membrane;other membranes;other cell component	transporter activity;other molecular function	Pf00287	11932	ENSMUSG00000041329	Atp1b2	mmu:11932; P14231	Calcium regulation in cardiac cells	Ion homeostasis; Ion transport by P-type ATPases	3	0	1.217	1
104	High	Master Protein	P18872	Guanine nucleotide-binding protein G(o) subunit alpha [OS=Mus musculus]	0	17.082	18	5	13	5	354	40.1	5.53	22.05	5	transport;signal transduction;other biological processes	plasma membrane;other membranes;other cell component	signal transduction activity or receptor binding;other molecular function	Pf00503	14681	ENSMUSG00000031748	Gnao1	mmu:14681; P18872; P18873	G protein signaling pathways; Calcium regulation in cardiac cells	Ca2+ pathway	3	0	1.215	1
105	High	Master Protein	Q60932	Voltage-dependent anion-selective channel protein 1 [OS=Mus musculus]	0	38.789	39	8	35	7	296	32.3	8.43	77.15	8	cell-cell signaling;other metabolic processes;stress response;transport;other biological processes	plasma membrane;other membranes;mitochondrion;ER/Golgi;other cell component	transporter activity;other molecular function	Pf01459	22333	ENSMUSG00000020402	Vdac1	B1ASZ9; mmu:22333; Q5SVC6; Q60932		Ub-specific processing proteases; PINK1-PRKN Mediated Mitophagy; Pyruvate metabolism	3	1	1.214	1
106	High	Master Protein	Q9R0K7	Plasma membrane calcium-transporting ATPase 2 [OS=Mus musculus]	0	81.14	19	18	63	11	1198	132.5	5.96	71.41	18	cell organization and biogenesis;other metabolic processes;transport;developmental processes;other biological processes	plasma membrane;other membranes;ER/Golgi;other cell component	signal transduction activity or receptor binding;transporter activity;other molecular function	Pf00122, Pf00689, Pf00690, Pf08282, Pf12424, Pf13246	11941	ENSMUSG00000030302	Atp2b2	mmu:11941; O88863; Q9R0K7	Calcium regulation in cardiac cells	Ion homeostasis; Ion transport by P-type ATPases; Reduction of cytosolic Ca++ levels	4	7	1.213	1
107	High	Master Protein	Q9CQI6	Coactosin-like protein [OS=Mus musculus]	0	8.743	22	4	17	4	142	15.9	5.4	2.1	4	cell organization and biogenesis;stress response	cytosol;cytoskeleton;nucleus;other cell component	cytoskeletal activity;other molecular function	Pf00241	72042	ENSMUSG00000031827	Cotl1	mmu:72042; Q9CQI6		Neutrophil degranulation	1	0	1.212	1
108	High	Master Protein	Q6PIC6	Sodium/potassium-transporting ATPase subunit alpha-3 [OS=Mus musculus]	0	162.444	39	31	112	17	1013	111.6	5.41	225.11	31	cell organization and biogenesis;transport;signal transduction;other biological processes	plasma membrane;other membranes;ER/Golgi;nucleus;other cell component	signal transduction activity or receptor binding;transporter activity;other molecular function	Pf00122, Pf00689, Pf00690, Pf13246	232975	ENSMUSG00000040907	Atp1a3	mmu:232975; Q6PIC6		Ion homeostasis; Ion transport by P-type ATPases	2	13	1.202	1
109	High	Master Protein	Q03265	ATP synthase subunit alpha, mitochondrial [OS=Mus musculus]	0	20.737	14	7	8	7	553	59.7	9.19	7.03	7	other metabolic processes;transport;other biological processes	plasma membrane;other membranes;mitochondrion;nucleus;other cell component	signal transduction activity or receptor binding;transporter activity;other molecular function	Pf00006, Pf00306, Pf02874	11946	ENSMUSG00000025428	Atp5f1a	mmu:11946; Q03265; Q3TFN0; Q3THN8; Q3TPR0; Q3TPV3; Q3TZU3; Q3UIR7; Q543Y6	Oxidative phosphorylation; Electron transport chain	Formation of ATP by chemiosmotic coupling; Cristae formation	4	0	1.2	1
110	High	Master Protein	Q68FD5	Clathrin heavy chain 1 [OS=Mus musculus]	0	111.713	21	28	71	28	1675	191.4	5.69	120.08	28	cell cycle OR cell proliferation;cell organization and biogenesis;other metabolic processes;transport;other biological processes	plasma membrane;other membranes;cytosol;cytoskeleton;ER/Golgi;nucleus;other cytoplasmic organelle;other cell component	signal transduction activity or receptor binding;cytoskeletal activity;nucleic acid binding activity;other molecular function	Pf00637, Pf01394, Pf09268, Pf13838	67300	ENSMUSG00000047126	Cltc	mmu:67300; Q68FD5	IL-7 signaling pathway; Kit receptor signaling pathway	Recycling pathway of L1; MHC class II antigen presentation; Golgi Associated Vesicle Biogenesis; Lysosome Vesicle Biogenesis; Cargo recognition for clathrin-mediated endocytosis; VLDLR internalisation and degradation; LDL clearance; Retrograde neurotrophin signalling; Formation of annular gap junctions; WNT5A-dependent internalization of FZD4; WNT5A-dependent internalization of FZD2, FZD5 and ROR…	17	0	1.194	1
111	High	Master Protein	Q99JG2	G-protein coupled receptor 37-like 1 [OS=Mus musculus]	0	15.811	9	4	18	4	481	52.7	7.36	19.62	4	developmental processes;signal transduction;other biological processes	plasma membrane;other membranes;other cell component	other molecular function	Pf00001	171469	ENSMUSG00000026424	Gpr37l1	mmu:171469; O88313; Q80UB9; Q99JG1; Q99JG2	GPCRs, odorant; GPCRs, class A rhodopsin-like; GPCRs, other	G alpha (i) signalling events; Peptide ligand-binding receptors	5	0	1.183	1
112	High	Master Protein	Q05793	Basement membrane-specific heparan sulfate proteoglycan core protein [OS=Mus musculus]	0	12.726	1	4	11	4	3707	398	6.32	10.63	4	cell organization and biogenesis;transport;developmental processes;signal transduction;other biological processes	non-structural extracellular;extracellular matrix;ER/Golgi	other molecular function	Pf00008, Pf00052, Pf00053, Pf00054, Pf00057, Pf07679, Pf13927	15530		Hspg2	mmu:15530; Q05793			0	0	1.182	1
113	High	Master Protein	P00920	Carbonic anhydrase 2 [OS=Mus musculus]	0	43.81	37	7	26	7	260	29	7.01	52.35	7	transport;signal transduction;other biological processes	non-structural extracellular;plasma membrane;other membranes;cytosol;other cell component	other molecular function	Pf00194	12349	ENSMUSG00000027562	Ca2	mmu:12349; P00920; Q6LDQ7; Q7TPE1; Q9DCT3; Q9DCY9		Erythrocytes take up carbon dioxide and release oxygen; Erythrocytes take up oxygen and release carbon dioxide; Reversible hydration of carbon dioxide	3	0	1.177	1
114	High	Master Protein	O88343	Electrogenic sodium bicarbonate cotransporter 1 [OS=Mus musculus]	0	23.957	8	7	18	7	1079	121.4	6.84	20.85	7	transport;other biological processes	plasma membrane;other membranes;other cell component	transporter activity;other molecular function	Pf00955, Pf07565	54403	ENSMUSG00000060961	Slc4a4	mmu:54403; O88343; Q3USE4; Q8BUG0; Q8QZR9; Q9R1C4		Bicarbonate transporters	1	0	1.168	1
115	High	Master Protein	P39061	Collagen alpha-1(XVIII) chain [OS=Mus musculus]	0	15.239	3	5	17	5	1774	182.1	5.62	17.64	5	cell adhesion;cell cycle OR cell proliferation;cell organization and biogenesis;developmental processes;other biological processes	extracellular matrix;other cell component	extracellular structural activity;other molecular function	Pf01391, Pf01392, Pf06121, Pf06482, Pf13385, Pf20010	12822	ENSMUSG00000001435	Col18a1	mmu:12822; P39061; Q60672; Q61434; Q61437; Q62001; Q62002; Q6NZK9; Q6P1Y4; Q8CCZ8; Q9CRT2; Q9JK63		Assembly of collagen fibrils and other multimeric structures; Integrin cell surface interactions; Collagen chain trimerization; Collagen degradation; Activation of Matrix Metalloproteinases	6	0	1.158	1
116	High	Master Protein	P15105	Glutamine synthetase [OS=Mus musculus]	0	23.803	15	6	16	6	373	42.1	7.08	35.94	6	cell cycle OR cell proliferation;protein metabolism;other metabolic processes;stress response;developmental processes;other biological processes	plasma membrane;other membranes;cytosol;ER/Golgi;other cell component	other molecular function	Pf00120, Pf03951	14645	ENSMUSG00000026473	Glul	mmu:14645; P15105; Q3TRK7; Q64432; Q91VC6		Glutamate and glutamine metabolism; Astrocytic Glutamate-Glutamine Uptake And Metabolism	2	0	1.158	1
117	High	Master Protein	P84091	AP-2 complex subunit mu [OS=Mus musculus]	0	31.539	20	9	24	9	435	49.6	9.54	27.71	9	cell organization and biogenesis;transport;other biological processes	plasma membrane;other membranes;other cell component	signal transduction activity or receptor binding;other molecular function	Pf00928, Pf01217	11773	ENSMUSG00000022841	Ap2m1	mmu:11773; P20172; P53679; P84091		Recycling pathway of L1; MHC class II antigen presentation; Cargo recognition for clathrin-mediated endocytosis; VLDLR internalisation and degradation; LDL clearance; Trafficking of GluR2-containing AMPA receptors; Retrograde neurotrophin signalling; Formation of annular gap junctions; WNT5A-dependent internalization of FZD4; WNT5A-dependent internalization of FZD2, FZD5 and ROR2	12	0	1.152	1
118	High	Master Protein	P60202	Myelin proteolipid protein [OS=Mus musculus]	0	25.759	20	5	38	5	277	30.1	8.35	92.67	5	cell organization and biogenesis;other metabolic processes;stress response;developmental processes;signal transduction;other biological processes	plasma membrane;other membranes;other cell component	other molecular function	Pf01275	18823	ENSMUSG00000031425	Plp1	mmu:18823; P04400; P06905; P60202; Q9WUS9			0	0	1.149	1
119	High	Master Protein	P47857	ATP-dependent 6-phosphofructokinase, muscle type [OS=Mus musculus]	0	22.474	9	7	16	7	780	85.2	8	20.44	7	other metabolic processes;other biological processes	plasma membrane;other membranes;cytosol;cytoskeleton;nucleus	kinase activity;other molecular function	Pf00365	18642	ENSMUSG00000033065	Pfkm	C8CMN5; C8CMN6; C8CMN7; mmu:18642; O35513; P47857; Q543L1; Q9JK94	Glycolysis and gluconeogenesis; Insulin signaling	Glycolysis	3	0	1.14	1
120	High	Master Protein	P70663	SPARC-like protein 1 [OS=Mus musculus]	0	23.65	11	5	12	5	650	72.2	4.6	12.48	5	cell adhesion;cell organization and biogenesis;signal transduction;other biological processes	non-structural extracellular;extracellular matrix;other cell component	other molecular function	Pf07648, Pf09289, Pf10591	13602	ENSMUSG00000029309	Sparcl1	E9QPH2; mmu:13602; P70663; P97810; Q99L82		Regulation of Insulin-like Growth Factor (IGF) transport and uptake by Insulin-like Growth Factor Binding Proteins (IGFBPs); Post-translational protein phosphorylation	2	0	1.138	1
121	High	Master Protein	P51881	ADP/ATP translocase 2 [OS=Mus musculus]	0	56.547	39	13	75	5	298	32.9	9.73	136.6	13	cell cycle OR cell proliferation;cell organization and biogenesis;other metabolic processes;transport;other biological processes	other membranes;cytoskeleton;mitochondrion	transporter activity;other molecular function	Pf00153	11740	ENSMUSG00000016319	Slc25a5	mmu:11740; P51881; Q61311	Electron transport chain	Transport of nucleosides and free purine and pyrimidine bases across the plasma membrane	2	0	1.132	1
122	High	Master Protein	Q61361	Brevican core protein [OS=Mus musculus]	0	43.527	18	15	55	15	883	95.8	4.93	89.95	15	cell adhesion;cell organization and biogenesis;developmental processes;other biological processes	non-structural extracellular;extracellular matrix;other cell component	other molecular function	Pf00008, Pf00059, Pf00084, Pf00193, Pf07686	12032	ENSMUSG00000004892	Bcan	mmu:12032; Q61361; Q80WT7	Spinal cord injury	Degradation of the extracellular matrix; ECM proteoglycans; A tetrasaccharide linker sequence is required for GAG synthesis; Chondroitin sulfate biosynthesis; CS/DS degradation; Dermatan sulfate biosynthesis	7	0	1.126	1
123	High	Master Protein	P68369	Tubulin alpha-1A chain [OS=Mus musculus]	0	77.612	41	14	65	6	451	50.1	5.06	155.13	14	cell cycle OR cell proliferation;cell organization and biogenesis;other metabolic processes;transport;developmental processes;signal transduction;other biological processes	plasma membrane;other membranes;cytosol;cytoskeleton;other cytoplasmic organelle;other cell component	cytoskeletal activity;other molecular function	Pf00091, Pf03953	22142	ENSMUSG00000072235	Tuba1a	mmu:22142; P02551; P05210; P05212; P68369; Q3TGF0; Q3TIW2; Q3TPJ1; Q3ULN1; Q5XJF8		HSP90 chaperone cycle for steroid hormone receptors (SHR) in the presence of ligand; The role of GTSE1 in G2/M progression after G2 checkpoint; RHO GTPases Activate Formins; Recycling pathway of L1; RHO GTPases activate IQGAPs; COPI-independent Golgi-to-ER retrograde traffic; Separation of Sister Chromatids; Regulation of PLK1 Activity at G2/M Transition; Aggrephagy; COPI-dependent Golgi-to-ER re…	28	8	1.118	1
124	High	Master Protein	P60710	Actin, cytoplasmic 1 [OS=Mus musculus]	0	56.449	34	11	39	4	375	41.7	5.48	70.66	11	cell organization and biogenesis;protein metabolism;other metabolic processes;developmental processes;other biological processes	plasma membrane;other membranes;cytosol;cytoskeleton;nucleus;other cell component	cytoskeletal activity;other molecular function	Pf00022	11461	ENSMUSG00000029580	Actb	mmu:11461; P02570; P60710; P70514; P99021; Q11211; Q3TI89; Q3TVP6; Q64316; Q6ZWM3	Myometrial relaxation and contraction pathways; Regulation of actin cytoskeleton; Focal adhesion	Regulation of actin dynamics for phagocytic cup formation; RHOBTB2 GTPase cycle; Clathrin-mediated endocytosis; Interaction between L1 and Ankyrins; MAP2K and MAPK activation; RHO GTPases Activate Formins; Recycling pathway of L1; RHO GTPases activate IQGAPs; EPHB-mediated forward signaling; Adherens junctions interactions; Formation of annular gap junctions; VEGFA-VEGFR2 Pathway; Cell-extracellu…	18	7	1.111	1
125	High	Master Protein	P35700	Peroxiredoxin-1 [OS=Mus musculus]	0	31.549	47	7	24	7	199	22.2	8.12	48.95	7	cell cycle OR cell proliferation;other metabolic processes;stress response;other biological processes	cytosol;mitochondrion;nucleus;other cytoplasmic organelle;other cell component	other molecular function	Pf00578, Pf10417	18477	ENSMUSG00000028691	Prdx1	mmu:18477; P35700; Q3UBV4; Q9CWI2	Oxidative stress and redox pathway	TP53 Regulates Metabolic Genes; Detoxification of Reactive Oxygen Species; NFE2L2 regulating anti-oxidant/detoxification enzymes	4	0	1.099	1
126	High	Master Protein	P53994	Ras-related protein Rab-2A [OS=Mus musculus]	0	12.328	20	4	6	4	212	23.5	6.54	11.85	4	cell organization and biogenesis;transport	other membranes;ER/Golgi;other cell component	other molecular function	Pf00071	59021	ENSMUSG00000047187	Rab2a	mmu:59021; P53994; Q3UK45	Focal adhesion: PI3K-Akt-mTOR signaling pathway	RAB geranylgeranylation; Golgi Cisternae Pericentriolar Stack Reorganization	3	0	1.091	1
127	High	Master Protein	P68040	Receptor of activated protein C kinase 1 [OS=Mus musculus]	0	31.643	31	7	15	7	317	35.1	7.69	24.31	7	cell cycle OR cell proliferation;protein metabolism;other metabolic processes;developmental processes;signal transduction;other biological processes	plasma membrane;cytosol;mitochondrion;translational apparatus;nucleus;other cell component	signal transduction activity or receptor binding;enzyme regulator activity;translation activity;other molecular function	Pf00400	14694	ENSMUSG00000020372	Rack1	mmu:14694; P25388; P68040; P99049; Q3THP0; Q3THY7; Q3TKQ0; Q3TW88; Q5NCC5; Q5NCC6; Q9CSQ0; Q9ERM6	IL-3 signaling pathway; IL-2 signaling pathway	Regulation of TNFR1 signaling; TNFR1-induced NF-kappa-B signaling pathway; TNFR1-mediated ceramide production	5	0	1.082	1
128	High	Master Protein	Q9Z1X4	Interleukin enhancer-binding factor 3 [OS=Mus musculus]	0	71.305	21	16	64	16	898	96	8.76	82.11	16	protein metabolism;other metabolic processes;stress response;other biological processes	mitochondrion;nucleus;other cell component	nucleic acid binding activity;other molecular function	Pf00035, Pf07528	16201	ENSMUSG00000032178	Ilf3	mmu:16201; Q80VD5; Q812A1; Q8BP80; Q8C2H8; Q8K588; Q9Z1X4	mRNA processing	Regulation of CDH11 gene transcription	2	0	1.045	1
129	High	Master Protein	P10493	Nidogen-1 [OS=Mus musculus]	0	40.587	11	12	35	11	1245	136.5	5.44	61.12	12	cell adhesion;cell-cell signaling;cell organization and biogenesis;developmental processes;signal transduction;other biological processes	non-structural extracellular;extracellular matrix;other cell component	other molecular function	Pf00058, Pf00086, Pf06119, Pf07474, Pf07645, Pf12662, Pf12947, Pf14670	18073	ENSMUSG00000005397	Nid1	mmu:18073; P10493; Q3TKX9; Q8BQI3; Q8C3U8; Q8C9P6		Laminin interactions; Degradation of the extracellular matrix	2	1	1.024	1
130	High	Master Protein	Q791V5	Mitochondrial carrier homolog 2 [OS=Mus musculus]	0	15.581	17	4	13	4	303	33.5	8.25	23.01	4	cell organization and biogenesis;other metabolic processes;transport;other biological processes	other membranes;mitochondrion	other molecular function	Pf00153	56428	ENSMUSG00000027282	Mtch2	mmu:56428; Q3TPS5; Q791V5; Q99LZ6; Q9D060; Q9D7Y2; Q9QZP3			0	0	1.021	1
131	High	Master Protein	A2ASQ1	Agrin [OS=Mus musculus]	0	15.24	4	5	8	5	1950	207.4	6.32	2.32	5	cell-cell signaling;cell organization and biogenesis;other metabolic processes;developmental processes;other biological processes	non-structural extracellular;extracellular matrix;plasma membrane;other membranes;ER/Golgi;other cell component	other molecular function	Pf00008, Pf00050, Pf00053, Pf00054, Pf01390, Pf07648		ENSMUSG00000041936	Agrn	A2ASP9; A2ASQ0; A2ASQ1; B2RWU1	Primary focal segmental glomerulosclerosis (FSGS)	ECM proteoglycans; Retinoid metabolism and transport; A tetrasaccharide linker sequence is required for GAG synthesis; HS-GAG biosynthesis; HS-GAG degradation	6	0	1.002	1
132	High	Master Protein	P28651	Carbonic anhydrase-related protein [OS=Mus musculus]	0	44.901	42	8	31	8	291	33.1	4.78	79.25	8	signal transduction	other cell component	other molecular function	Pf00194	12319	ENSMUSG00000041261	Ca8	mmu:12319; P28651; Q8CF58; Q91XF6			0	0	0.986	1
133	High	Master Protein	Q8K2B3	Succinate dehydrogenase [ubiquinone] flavoprotein subunit, mitochondrial [OS=Mus musculus]	0	23.081	12	7	17	7	664	72.5	7.37	5.14	7	other metabolic processes;developmental processes	other membranes;mitochondrion;nucleus	other molecular function	Pf00890, Pf02910	66945	ENSMUSG00000021577	Sdha	mmu:66945; Q0QF19; Q3UH25; Q3UKP7; Q3V4B1; Q8K2B3; Q921P5; Q9Z1Z4	Electron transport chain; TCA cycle	Citric acid cycle (TCA cycle)	3	0	0.985	1
134	High	Master Protein	P43274	Histone H1.4 [OS=Mus musculus]	0	16.786	15	4	24	4	219	22	11.11	46.63	4	cell organization and biogenesis;protein metabolism;other metabolic processes;other biological processes	nucleus;other cell component	nucleic acid binding activity;other molecular function	Pf00538	50709	ENSMUSG00000051627	H1-4	mmu:50709; P43274; Q5EBH3		Formation of Senescence-Associated Heterochromatin Foci (SAHF); Apoptosis induced DNA fragmentation	2	0	0.98	1
135	High	Master Protein	P28798	Progranulin [OS=Mus musculus]	0	21.402	11	4	12	4	589	63.4	6.8	30.1	4	cell cycle OR cell proliferation;cell organization and biogenesis;protein metabolism;other metabolic processes;stress response;transport;developmental processes;signal transduction;other biological processes	non-structural extracellular;plasma membrane;other membranes;ER/Golgi;other cytoplasmic organelle;other cell component	signal transduction activity or receptor binding;other molecular function	Pf00396	14824	ENSMUSG00000034708	Grn	mmu:14824; P28798		Neutrophil degranulation	1	0	0.953	1
136	High	Master Protein	O88322	Nidogen-2 [OS=Mus musculus]	0	22.506	6	7	18	6	1403	153.8	5.38	17.67	7	cell adhesion	non-structural extracellular;extracellular matrix;plasma membrane;other membranes;other cell component	other molecular function	Pf00058, Pf00086, Pf06119, Pf07474, Pf07645, Pf12947	18074	ENSMUSG00000021806	Nid2	mmu:18074; O88322; Q7TQF0		Laminin interactions	1	0	0.953	1
137	High	Master Protein	Q04447	Creatine kinase B-type [OS=Mus musculus]	0	50.039	32	9	26	9	381	42.7	5.67	54.12	9	other metabolic processes;developmental processes;other biological processes	cytosol;mitochondrion;nucleus;other cell component	kinase activity;other molecular function	Pf00217, Pf02807	12709	ENSMUSG00000001270	Ckb	mmu:12709; Q04447; Q3KQP4; Q3TKI3; Q3U5P5; Q3UF71; Q9CXK6		RND3 GTPase cycle; Creatine metabolism	2	0	0.941	1
138	High	Master Protein	Q9QUP5	Hyaluronan and proteoglycan link protein 1 [OS=Mus musculus]	0	42.767	29	11	58	10	356	40.5	7.8	96.51	11	cell adhesion;developmental processes;other biological processes	non-structural extracellular;extracellular matrix;other cell component	other molecular function	Pf00193, Pf07686	12950	ENSMUSG00000021613	Hapln1	mmu:12950; Q9D1G9; Q9QUP5; Q9Z1X7		ECM proteoglycans	1	1	0.939	1
139	High	Master Protein	O70133	ATP-dependent RNA helicase A [OS=Mus musculus]	0	37.366	9	10	26	10	1380	149.4	6.83	36.56	10	cell organization and biogenesis;RNA metabolism OR transcription;other metabolic processes;stress response;transport;other biological processes	cytosol;cytoskeleton;translational apparatus;nucleus;other cell component	translation activity;nucleic acid binding activity;other molecular function	Pf00035, Pf00270, Pf00271, Pf04408, Pf07717	13211		Dhx9	mmu:13211; O35931; O54703; O70133; Q5FWY1; Q6R5F7; Q9CSA2	Mechanisms associated with pluripotency; mRNA processing	mRNA Splicing - Major Pathway; RIP-mediated NFkB activation via ZBP1; DEx/H-box helicases activate type I IFN and inflammatory cytokines production	5	0	0.919	1
140	High	Master Protein	Q9Z130	Heterogeneous nuclear ribonucleoprotein D-like [OS=Mus musculus]	0	96.225	33	13	79	11	301	33.5	7.31	202.06	13	RNA metabolism OR transcription;other metabolic processes;other biological processes	nucleus;other cell component	nucleic acid binding activity	Pf00076			Hnrnpdl	Q9CT01; Q9Z130			0	2	0.907	1
141	High	Master Protein	P49312	Heterogeneous nuclear ribonucleoprotein A1 [OS=Mus musculus]	0	46.596	23	8	41	4	320	34.2	9.23	77.66	8	RNA metabolism OR transcription;other metabolic processes;transport;other biological processes	cytosol;nucleus;other cell component	nucleic acid binding activity;other molecular function	Pf00076, Pf11627	15382	ENSMUSG00000046434	Hnrnpa1	mmu:15382; P49312; P97312; Q3V269	mRNA processing	mRNA Splicing - Major Pathway; Processing of Capped Intron-Containing Pre-mRNA; FGFR2 alternative splicing	4	0	0.904	1
142	High	Master Protein	Q8VDM6	Heterogeneous nuclear ribonucleoprotein U-like protein 1 [OS=Mus musculus]	0	15.261	6	5	13	5	859	95.9	6.58	15.59	5		nucleus;other cell component	nucleic acid binding activity;other molecular function	Pf00622, Pf02037, Pf13671	232989	ENSMUSG00000040725	Hnrnpul1	mmu:232989; Q3U201; Q3UPB0; Q6AZA7; Q8BY45; Q8K365; Q8VDM6			0	0	0.886	1
143	High	Master Protein	Q80WM4	Hyaluronan and proteoglycan link protein 4 [OS=Mus musculus]	0	20.646	16	5	17	4	400	42.8	8.85	19.42	5	cell adhesion;cell-cell signaling;cell organization and biogenesis;developmental processes;other biological processes	non-structural extracellular;extracellular matrix;other cell component	extracellular structural activity;other molecular function	Pf00193, Pf07686	330790	ENSMUSG00000007594	Hapln4	mmu:330790; Q05AB1; Q80WM4; Q80XX2			0	0	0.872	1
144	High	Master Protein	P56959	RNA-binding protein FUS [OS=Mus musculus]	0	121.473	16	10	225	10	518	52.6	9.36	616.53	10	cell organization and biogenesis;protein metabolism;RNA metabolism OR transcription;other metabolic processes;other biological processes	nucleus;other cell component	signal transduction activity or receptor binding;cytoskeletal activity;nucleic acid binding activity;other molecular function	Pf00076, Pf00641	233908	ENSMUSG00000030795	Fus	mmu:233908; P56959	mRNA processing	mRNA Splicing - Major Pathway; Processing of Capped Intron-Containing Pre-mRNA	3	0	0.871	1
145	High	Master Protein	P01027	Complement C3 [OS=Mus musculus]	0	20.303	4	6	13	6	1663	186.4	6.73	21.18	6	cell-cell signaling;cell organization and biogenesis;protein metabolism;other metabolic processes;stress response;developmental processes;signal transduction;other biological processes	non-structural extracellular;plasma membrane;other membranes;other cell component	signal transduction activity or receptor binding;enzyme regulator activity;other molecular function	Pf00207, Pf01759, Pf01821, Pf01835, Pf07677, Pf07678, Pf07703, Pf17789, Pf17790, Pf17791	12266	ENSMUSG00000024164	C3	mmu:12266; P01027; Q61370; Q80XP1	Complement activation, classical pathway; Tyrobp causal network in microglia; Comprehensive IL-17A signaling	Immunoregulatory interactions between a Lymphoid and a non-Lymphoid cell; Regulation of Complement cascade; Neutrophil degranulation; Regulation of Insulin-like Growth Factor (IGF) transport and uptake by Insulin-like Growth Factor Binding Proteins (IGFBPs); Post-translational protein phosphorylation; G alpha (i) signalling events; Peptide ligand-binding receptors; Alternative complement activati…	12	0	0.868	1
146	High	Master Protein	P28665	Murinoglobulin-1 [OS=Mus musculus]	0	32.027	8	10	29	10	1476	165.2	6.42	33.48	10	developmental processes;other biological processes	non-structural extracellular	enzyme regulator activity;other molecular function	Pf00207, Pf01835, Pf07677, Pf07678, Pf07703, Pf17789, Pf17791	17836	ENSMUSG00000059908	Mug1	mmu:17836; P28665; Q3UNE7; Q80XE6			0	0	0.861	1
147	High	Master Protein	Q61545	RNA-binding protein EWS [OS=Mus musculus]	0	108.928	17	10	93	10	655	68.4	9.33	227.65	10	RNA metabolism OR transcription;other biological processes	plasma membrane;other membranes;nucleus;other cell component	nucleic acid binding activity;other molecular function	Pf00076, Pf00641	14030	ENSMUSG00000009079	Ewsr1	mmu:14030; Q61545; Q9D2P0	Mechanisms associated with pluripotency; mRNA processing		2	0	0.821	1
148	High	Master Protein	Q99020	Heterogeneous nuclear ribonucleoprotein A/B [OS=Mus musculus]	0	34.305	29	7	23	6	285	30.8	7.91	38.73	7	RNA metabolism OR transcription;other metabolic processes;other biological processes	cytosol;nucleus;other cell component	nucleic acid binding activity;other molecular function	Pf00076, Pf08143	15384	ENSMUSG00000020358	Hnrnpab	mmu:15384; Q8BPE0; Q99020	mRNA processing		1	0	0.78	1
149	High	Master Protein	Q7TMK9	Heterogeneous nuclear ribonucleoprotein Q [OS=Mus musculus]	0	17.27	9	6	26	6	623	69.6	8.59	25.35	6	RNA metabolism OR transcription;other metabolic processes;stress response;other biological processes	other membranes;cytosol;ER/Golgi;nucleus;other cell component	nucleic acid binding activity	Pf00076, Pf18360	56403	ENSMUSG00000032423	Syncrip	mmu:56403; O88991; Q2YDV8; Q68ED6; Q7TMK9; Q80YV6; Q8BGP1; Q8C5K6; Q8CGC2; Q91ZR0; Q99KU9; Q9QYF4	mRNA processing		1	0	0.78	1
150	High	Master Protein	Q60668	Heterogeneous nuclear ribonucleoprotein D0 [OS=Mus musculus]	0	59.265	25	11	60	9	355	38.3	7.81	121.47	11	RNA metabolism OR transcription;other metabolic processes;developmental processes;other biological processes	cytosol;nucleus;other cell component	nucleic acid binding activity;other molecular function	Pf00076, Pf08143	11991	ENSMUSG00000000568	Hnrnpd	mmu:11991; Q60667; Q60668; Q80ZJ0; Q91X94	mRNA processing	mRNA Splicing - Major Pathway; Processing of Capped Intron-Containing Pre-mRNA; AUF1 (hnRNP D0) binds and destabilizes mRNA	4	0	0.761	1
151	High	Master Protein	O35737	Heterogeneous nuclear ribonucleoprotein H [OS=Mus musculus]	0	19.318	14	5	14	5	449	49.2	6.3	23.56	5	RNA metabolism OR transcription;other metabolic processes;other biological processes	cytosol;nucleus;other cell component	nucleic acid binding activity;other molecular function	Pf00076, Pf08080	59013	ENSMUSG00000007850	Hnrnph1	mmu:59013; O35737	mRNA processing	mRNA Splicing - Major Pathway; Processing of Capped Intron-Containing Pre-mRNA	3	0	0.752	1
152	High	Master Protein	O88569	Heterogeneous nuclear ribonucleoproteins A2/B1 [OS=Mus musculus]	0	91.433	48	18	107	14	353	37.4	8.95	222.68	18	cell organization and biogenesis;DNA metabolism;RNA metabolism OR transcription;other metabolic processes;transport;other biological processes	non-structural extracellular;cytosol;nucleus;other cell component	nucleic acid binding activity;other molecular function	Pf00076, Pf11627	53379	ENSMUSG00000004980	Hnrnpa2b1	B9EJ02; mmu:53379; O88569; Q3UVJ5; Q6PCV9; Q8C2A0; Q8CJ71; Q91ZR9; Q9R204	mRNA processing	mRNA Splicing - Major Pathway; Processing of Capped Intron-Containing Pre-mRNA	3	4	0.744	1
153	High	Master Protein	Q8BG05	Heterogeneous nuclear ribonucleoprotein A3 [OS=Mus musculus]	0	101.584	36	16	117	14	379	39.6	9.01	211.09	16	RNA metabolism OR transcription;other metabolic processes;transport	nucleus;other cell component	transporter activity;nucleic acid binding activity	Pf00076	229279	ENSMUSG00000059005	Hnrnpa3	mmu:229279; Q8BG05; Q8BHF8	mRNA processing	mRNA Splicing - Major Pathway; Processing of Capped Intron-Containing Pre-mRNA	3	0	0.741	1

## Sheet: FITM-BmTyr_b3
No.	Protein FDR Confidence: Combined	Master	Accession	Description	Exp. q-value: Combined	Sum PEP Score	Coverage [%]	# Peptides	# PSMs	# Unique Peptides	# AAs	MW [kDa]	calc. pI	Score Sequest HT: Sequest HT	# Peptides (by Search Engine): Sequest HT	Biological Process	Cellular Component	Molecular Function	Pfam IDs	Entrez Gene ID	Ensembl Gene ID	Gene Symbol	Gene ID	WikiPathways	Reactome Pathways	# Protein Pathway Groups	# Razor Peptides	Abundance Ratio: (FITM) / (wt)	# Protein Groups
1	High	Master Protein	Q68EF4	Metabotropic glutamate receptor 4 [OS=Mus musculus]	0	15.05	6	4	5	4	912	101.8	8.82	10.9	4	cell-cell signaling;signal transduction;other biological processes	plasma membrane;other membranes;other cell component	other molecular function	Pf00003, Pf01094, Pf07562	268934		Grm4	mmu:268934; Q68EF4; Q80UC2	GPCRs, class C metabotropic glutamate, pheromone	G alpha (i) signalling events; Class C/3 (Metabotropic glutamate/pheromone receptors)	3	0	1000	1		1			Q9Z2W9
2	High	Master Protein	P05532	Mast/stem cell growth factor receptor Kit [OS=Mus musculus]	0	9.215	5	4	7	4	979	109.3	7.21	4.18	4	cell adhesion;cell cycle OR cell proliferation;cell organization and biogenesis;protein metabolism;other metabolic processes;stress response;transport;developmental processes;signal transduction;other biological processes	non-structural extracellular;plasma membrane;other membranes;nucleus;other cell component	kinase activity;other molecular function	Pf00047, Pf07714	16590	ENSMUSG00000005672	Kit	mmu:16590; P05532; Q61415; Q61416; Q61417; Q6LEE9; Q6QJB7; Q6QJB8; Q7TS86; Q8C8K9	Focal adhesion: PI3K-Akt-mTOR signaling pathway; Kit receptor signaling pathway	RAF/MAP kinase cascade; PIP3 activates AKT signaling; PI5P, PP2A and IER3 Regulate PI3K/AKT Signaling; Regulation of KIT signaling	7	0	15.144	1		1			P97772
3	High	Master Protein	P97772	Metabotropic glutamate receptor 1 [OS=Mus musculus]	0	24.78	10	10	16	10	1199	133.1	6.86	19.63	10	cell-cell signaling;transport;signal transduction;other biological processes	plasma membrane;other membranes;nucleus;other cell component	other molecular function	Pf00003, Pf01094, Pf07562, Pf10606	14816	ENSMUSG00000019828	Grm1	mmu:14816; P97772; Q6AXG4; Q9EPV6	GPCRs, non-odorant ; Serotonin and anxiety; GPCRs, class C metabotropic glutamate, pheromone; GPCRs, other	G alpha (q) signalling events; Neurexins and neuroligins; Class C/3 (Metabotropic glutamate/pheromone receptors)	7	0	6.485	1		1			Q80T41
4	High	Master Protein	P23818	Glutamate receptor 1 [OS=Mus musculus]	0	21.074	11	9	22	6	907	101.5	7.69	30.08	9	cell-cell signaling;cell organization and biogenesis;transport;developmental processes;signal transduction;other biological processes	non-structural extracellular;plasma membrane;other membranes;cytosol;ER/Golgi;other cytoplasmic organelle;other cell component	signal transduction activity or receptor binding;transporter activity;cytoskeletal activity;other molecular function	Pf00060, Pf01094, Pf10613	14799	ENSMUSG00000020524	Gria1	mmu:14799; P23818		Synaptic adhesion-like molecules; COPII-mediated vesicle transport; Cargo concentration in the ER; Trafficking of GluR2-containing AMPA receptors; Unblocking of NMDA receptors, glutamate binding and activation; Activation of AMPA receptors	7	2	6.243	1		1			Q9JHG0
5	High	Master Protein	Q8C419	Probable G-protein coupled receptor 158 [OS=Mus musculus]	0	59.192	16	15	37	15	1200	134.3	8.09	62.18	15	signal transduction;other biological processes	plasma membrane;other membranes	other molecular function	Pf00003	241263	ENSMUSG00000045967	Gpr158	B1AWY4; mmu:241263; Q8C419; Q8CHB0	GPCRs, odorant		1	0	6.134	1		1			O88507
6	High	Master Protein	Q9CPW0	Contactin-associated protein-like 2 [OS=Mus musculus]	0	66.69	18	17	52	17	1332	148.1	6.77	92.83	17	cell adhesion;cell-cell signaling;cell cycle OR cell proliferation;cell organization and biogenesis;other metabolic processes;stress response;developmental processes;signal transduction;other biological processes	plasma membrane;other membranes;ER/Golgi;other cytoplasmic organelle;other cell component	other molecular function	Pf00754, Pf02210	66797	ENSMUSG00000039419	Cntnap2	mmu:66797; Q6P2K4; Q6ZQ31; Q9CPW0			0	0	6.072	1		1			P70232
7	High	Master Protein	P15209	BDNF/NT-3 growth factors receptor [OS=Mus musculus]	0	17.192	10	6	9	6	821	92.1	6.55	10.82	6	cell-cell signaling;protein metabolism;other metabolic processes;transport;developmental processes;signal transduction;other biological processes	plasma membrane;other membranes;cytosol;ER/Golgi;other cytoplasmic organelle;other cell component	signal transduction activity or receptor binding;kinase activity;other molecular function	Pf07679, Pf07714, Pf13855, Pf16920	18212	ENSMUSG00000055254	Ntrk2	mmu:18212; P15209; Q3TUF9; Q80WU0; Q91XJ9	BDNF pathway	Activated NTRK2 signals through PLCG1; Activated NTRK2 signals through FRS2 and FRS3; NTRK2 activates RAC1	4	0	6.005	1		1			Q68EF4
8	High	Master Protein	P13595	Neural cell adhesion molecule 1 [OS=Mus musculus]	0	30.715	9	9	18	9	1115	119.4	4.83	30.3	9	cell adhesion;cell organization and biogenesis;stress response;developmental processes;signal transduction;other biological processes	plasma membrane;other membranes;cytosol;other cell component	other molecular function	Pf00041, Pf07679, Pf13927	17967		Ncam1	mmu:17967; P13594; P13595; Q61949; Q61950; Q6LBU8; Q8BQ96; Q8C4B2; Q921P2; Q9R2A7		RAF/MAP kinase cascade; NCAM1 interactions; Signal transduction by L1	4	0	5.276	1		0			Q6GQU6
9	High	Master Protein	Q80T41	Gamma-aminobutyric acid type B receptor subunit 2 [OS=Mus musculus]	0	16.748	6	7	13	7	940	105.6	8.72	14.59	7	cell-cell signaling;signal transduction	plasma membrane;other membranes;other cell component	other molecular function	Pf00003, Pf01094, Pf18455	242425	ENSMUSG00000039809	Gabbr2	A2AL05; mmu:242425; Q80T41	GPCRs, non-odorant ; Splicing factor NOVA regulated synaptic proteins; GPCRs, class C metabotropic glutamate, pheromone	G alpha (i) signalling events; Class C/3 (Metabotropic glutamate/pheromone receptors); Activation of G protein gated Potassium channels; Inhibition of voltage gated Ca2+ channels via Gbeta/gamma subunits; GABA B receptor activation	8	0	5.095	1		1			Q61625
10	High	Master Protein	Q810U4	Neuronal cell adhesion molecule [OS=Mus musculus]	0	14.928	6	6	8	6	1256	138.4	5.91	12.85	6	cell adhesion;cell organization and biogenesis;developmental processes;other biological processes	non-structural extracellular;plasma membrane;other membranes;other cell component	cytoskeletal activity;other molecular function	Pf00041, Pf07679, Pf13882, Pf13927	319504	ENSMUSG00000020598	Nrcam	mmu:319504; Q80U33; Q810U4; Q8BLG8; Q8BX92; Q8BYJ8			0	0	5.063	1		0			P23818
11	High	Master Protein	Q99PJ0	Neurotrimin [OS=Mus musculus]	0	44.921	31	8	45	8	344	38	7.81	91.58	8	cell adhesion;other biological processes	non-structural extracellular;plasma membrane;other membranes;other cell component		Pf07679, Pf13927		ENSMUSG00000059974	Ntm	Q99PJ0		Post-translational modification: synthesis of GPI-anchored proteins	1	0	5.021	1		0			Q9CS84
12	High	Master Protein	Q6P9K9	Neurexin-3 [OS=Mus musculus]	0	26.099	5	7	17	4	1571	173.3	6.14	29.17	7	cell adhesion;cell-cell signaling;cell organization and biogenesis;transport;developmental processes;other biological processes	plasma membrane;other membranes;other cell component	other molecular function	Pf00008, Pf02210	18191	ENSMUSG00000066392	Nrxn3	E9PW93; E9Q466; mmu:18191; Q6P9K9; Q8CCT8		Neurexins and neuroligins	1	0	5	1		0			Q9R171
13	High	Master Protein	Q6PHS9	Voltage-dependent calcium channel subunit alpha-2/delta-2 [OS=Mus musculus]	0	21.704	10	10	15	10	1154	130.3	5.66	16.01	10	cell organization and biogenesis;transport;other biological processes	plasma membrane;other membranes	transporter activity;other molecular function	Pf00092, Pf08399, Pf08473	56808	ENSMUSG00000010066	Cacna2d2	B2RY16; mmu:56808; Q3TPT9; Q3TSS6; Q6PHS9; Q6REE3; Q8C8R8; Q8CHE9; Q920H5; Q920H6; Q9EQG2; Q9R142		Regulation of insulin secretion; Presynaptic depolarization and calcium channel opening; Phase 0 - rapid depolarisation; Phase 2 - plateau phase	4	0	4.965	1		1			Q9CPW0
14	High	Master Protein	Q80TS3	Adhesion G protein-coupled receptor L3 [OS=Mus musculus]	0	14.905	4	5	6	5	1537	171	6.71	12.09	5	cell adhesion;cell organization and biogenesis;developmental processes;signal transduction;other biological processes	plasma membrane;other membranes;other cell component	other molecular function	Pf00002, Pf01825, Pf02140, Pf02191, Pf02354, Pf16489	319387	ENSMUSG00000037605	Adgrl3	mmu:319387; Q3UHI7; Q3UM79; Q504Z9; Q5HZJ6; Q80T56; Q80TS3	GPCRs, non-odorant ; GPCRs, class B secretin-like		2	0	4.757	1		1			P05532
15	High	Master Protein	P11627	Neural cell adhesion molecule L1 [OS=Mus musculus]	0	18.692	6	6	12	6	1260	140.9	5.97	11.7	6	cell adhesion;cell organization and biogenesis;developmental processes;signal transduction;other biological processes	plasma membrane;other membranes;other cytoplasmic organelle;other cell component	signal transduction activity or receptor binding;other molecular function	Pf00041, Pf07679, Pf13882, Pf13927			L1cam	P11627		Interaction between L1 and Ankyrins; Recycling pathway of L1; Signal transduction by L1	4	0	4.747	1		0			Q9JIA1
16	High	Master Protein	P70232	Neural cell adhesion molecule L1-like protein [OS=Mus musculus]	0	11.025	4	4	4	4	1209	135	5.57	6.09	4	cell adhesion;cell organization and biogenesis;stress response;developmental processes;other biological processes	non-structural extracellular;plasma membrane;other membranes;other cell component	other molecular function	Pf00041, Pf07679, Pf13882, Pf13927	12661	ENSMUSG00000030077	Chl1	A2RRK1; mmu:12661; P70232; Q8BS24; Q8C6W0; Q8C823; Q8VBY7	Splicing factor NOVA regulated synaptic proteins		1	0	4.74	1		1			Q60841
17	High	Master Protein	Q80WM4	Hyaluronan and proteoglycan link protein 4 [OS=Mus musculus]	0	13.308	14	4	5	4	400	42.8	8.85	8.72	4	cell adhesion;cell-cell signaling;cell organization and biogenesis;developmental processes;other biological processes	non-structural extracellular;extracellular matrix;other cell component	extracellular structural activity;other molecular function	Pf00193, Pf07686	330790	ENSMUSG00000007594	Hapln4	mmu:330790; Q05AB1; Q80WM4; Q80XX2			0	0	4.591	1		0			P84091
18	High	Master Protein	Q9JIA1	Leucine-rich glioma-inactivated protein 1 [OS=Mus musculus]	0	17.014	13	6	12	6	557	63.6	8.02	15.14	6	cell organization and biogenesis;developmental processes;other biological processes	non-structural extracellular;ER/Golgi;other cell component	signal transduction activity or receptor binding	Pf03736, Pf13855	56839	ENSMUSG00000067242	Lgi1	A0A0G2JFT0; mmu:56839; Q9JIA1		LGI-ADAM interactions	1	0	4.56	1		1			Q91ZX7
19	High	Master Protein	Q91ZX7	Prolow-density lipoprotein receptor-related protein 1 [OS=Mus musculus]	0	16.57	2	5	8	5	4545	504.4	5.36	9.59	5	cell cycle OR cell proliferation;cell organization and biogenesis;other metabolic processes;stress response;transport;developmental processes;signal transduction;other biological processes	plasma membrane;other membranes;cytoskeleton;ER/Golgi;nucleus;other cytoplasmic organelle;other cell component	signal transduction activity or receptor binding;other molecular function	Pf00008, Pf00057, Pf00058, Pf07645, Pf12662, Pf14670, Pf16472	16971		Lrp1	mmu:16971; Q61291; Q91ZX7; Q920Y4	Statin pathway; Wnt signaling pathway	Scavenging of heme from plasma; Retinoid metabolism and transport	4	0	4.306	1		1			Q8C419
20	High	Master Protein	Q64444	Carbonic anhydrase 4 [OS=Mus musculus]	0	29.001	36	8	39	8	305	34.3	8.21	67.1	8	transport;other biological processes	non-structural extracellular;plasma membrane;other membranes;cytosol;ER/Golgi;other cell component	other molecular function	Pf00194	12351	ENSMUSG00000000805	Ca4	mmu:12351; Q64444		Erythrocytes take up carbon dioxide and release oxygen; Erythrocytes take up oxygen and release carbon dioxide; Reversible hydration of carbon dioxide	3	0	4.306	1		0			Q6PHS9
21	High	Master Protein	Q60841	Reelin [OS=Mus musculus]	0	11.147	1	4	6	4	3461	387.2	5.73	8.27	4	cell adhesion;cell organization and biogenesis;protein metabolism;other metabolic processes;stress response;developmental processes;signal transduction;other biological processes	non-structural extracellular;extracellular matrix;plasma membrane;other membranes;other cell component	signal transduction activity or receptor binding;other molecular function	Pf02014, Pf18720	19699	ENSMUSG00000042453	Reln	E9PZ78; mmu:19699; Q60841; Q9CUA6	Focal adhesion: PI3K-Akt-mTOR signaling pathway; Focal adhesion	Reelin signalling pathway	3	0	4.132	1		1			Q9Z2W8
22	High	Master Protein	Q5F226	Protocadherin Fat 2 [OS=Mus musculus]	0	122.009	12	43	87	43	4351	479.8	5.12	118.46	43	cell adhesion;other biological processes	plasma membrane;other membranes;ER/Golgi;other cell component	other molecular function	Pf00008, Pf00028, Pf02210	245827	ENSMUSG00000055333	Fat2	mmu:245827; Q3V1D4; Q5F226; Q69ZY7			0	0	4.047	1		1			Q56A07
23	High	Master Protein	Q9JHG0	Cerebellin-3 [OS=Mus musculus]	0	13.248	23	4	17	4	197	21.1	6.38	27.22	4	cell organization and biogenesis	non-structural extracellular;ER/Golgi;other cell component		Pf00386	56410	ENSMUSG00000040380	Cbln3	mmu:56410; Q9JHG0			0	0	4.041	1		1			P15209
24	High	Master Protein	P43406	Integrin alpha-V [OS=Mus musculus]	0	14.718	5	5	8	5	1044	115.3	5.63	9.42	5	cell adhesion;cell organization and biogenesis;other metabolic processes;stress response;transport;developmental processes;signal transduction;other biological processes	plasma membrane;other membranes;cytosol;other cell component	signal transduction activity or receptor binding;transporter activity;other molecular function	Pf00357, Pf01839, Pf08441	16410	ENSMUSG00000027087	Itgav	A2AKI6; mmu:16410; P43406	Primary focal segmental glomerulosclerosis (FSGS); Integrin-mediated cell adhesion	Neutrophil degranulation; Integrin cell surface interactions; ECM proteoglycans; Syndecan interactions; TGF-beta receptor signaling activates SMADs; Molecules associated with elastic fibres; Signal transduction by L1; VEGFA-VEGFR2 Pathway; PECAM1 interactions; Cross-presentation of particulate exogenous antigens (phagosomes)	13	0	3.965	1		0			Q5F226
25	High	Master Protein	Q9R171	Cerebellin-1 [OS=Mus musculus]	0	34.508	47	8	36	7	193	21.1	7.28	53	8	cell adhesion;cell organization and biogenesis;transport;developmental processes;other biological processes	non-structural extracellular;plasma membrane;other membranes;other cell component	other molecular function	Pf00386	12404	ENSMUSG00000031654	Cbln1	mmu:12404; P28655; Q9QVT5; Q9R171			0	1	3.862	1		1			Q80TS3
26	High	Master Protein	P10493	Nidogen-1 [OS=Mus musculus]	0	13.905	5	5	5	5	1245	136.5	5.44	8.35	5	cell adhesion;cell-cell signaling;cell organization and biogenesis;developmental processes;signal transduction;other biological processes	non-structural extracellular;extracellular matrix;other cell component	other molecular function	Pf00058, Pf00086, Pf06119, Pf07474, Pf07645, Pf12662, Pf12947, Pf14670	18073	ENSMUSG00000005397	Nid1	mmu:18073; P10493; Q3TKX9; Q8BQI3; Q8C3U8; Q8C9P6		Laminin interactions; Degradation of the extracellular matrix	2	0	3.826	1		0			P35436
27	High	Master Protein	Q9CS84	Neurexin-1 [OS=Mus musculus]	0	79.985	15	20	54	16	1514	166.1	6.09	90	20	cell adhesion;cell-cell signaling;cell organization and biogenesis;transport;developmental processes;signal transduction;other biological processes	plasma membrane;other membranes;ER/Golgi;nucleus;other cell component	signal transduction activity or receptor binding;other molecular function	Pf00008, Pf02210	18189	ENSMUSG00000024109	Nrxn1	G3UWZ9; O88722; Q80Y87; Q8CHE6; Q9CS84		Neurexins and neuroligins	1	4	3.812	1		1			Q8CJH3
28	High	Master Protein	P12960	Contactin-1 [OS=Mus musculus]	0	188.632	43	33	177	33	1020	113.3	6.16	280.46	33	cell adhesion;cell organization and biogenesis;other metabolic processes;developmental processes;signal transduction;other biological processes	plasma membrane;other membranes;other cell component	other molecular function	Pf00041, Pf00047, Pf07679, Pf13927	12805	ENSMUSG00000055022	Cntn1	mmu:12805; P12960; Q6NXV7; Q8BR42; Q8C6A0	Delta-Notch signaling pathway		1	0	3.806	1		0
29	High	Master Protein	B9EKR1	Receptor-type tyrosine-protein phosphatase zeta [OS=Mus musculus]	0	35.957	5	9	38	9	2312	254.2	4.88	74.59	9	cell organization and biogenesis;protein metabolism;other metabolic processes;developmental processes;other biological processes	non-structural extracellular;extracellular matrix;plasma membrane;other membranes;other cell component	signal transduction activity or receptor binding;other molecular function	Pf00041, Pf00102, Pf00194	19283	ENSMUSG00000068748	Ptprz1	B9EKR1; mmu:19283	Spinal cord injury	Signaling by ALK; Other interleukin signaling	3	0	3.552	1		0
30	High	Master Protein	Q9DB72	BTB/POZ domain-containing protein 17 [OS=Mus musculus]	0	56.96	33	11	31	11	478	52.6	9.42	82.17	11		non-structural extracellular		Pf00651, Pf07707	72014	ENSMUSG00000000202	Btbd17	mmu:72014; Q9DB72			0	0	3.529	1		0
31	High	Master Protein	Q6GQU6	Leucine-rich repeat and immunoglobulin-like domain-containing nogo receptor-interacting protein 3 [OS=Mus musculus]	0	11.954	10	5	8	5	589	64.6	8.31	8.11	5		non-structural extracellular;extracellular matrix;other membranes		Pf07679, Pf13855	237403	ENSMUSG00000051067	Lingo3	E9QK50; mmu:237403; Q6GQU6			0	0	3.487	1		1
32	High	Master Protein	O88507	Ciliary neurotrophic factor receptor subunit alpha [OS=Mus musculus]	0	27.682	15	5	20	5	372	40.8	6.83	30.81	5	signal transduction;other biological processes	non-structural extracellular;plasma membrane;other membranes	signal transduction activity or receptor binding;other molecular function	Pf00041	12804	ENSMUSG00000028444	Cntfr	mmu:12804; O88507; Q80T01	Delta-Notch signaling pathway; Adipogenesis genes	IL-6-type cytokine receptor ligand interactions	3	0	3.432	1		1
33	High	Master Protein	Q9Z2W8	Glutamate receptor 4 [OS=Mus musculus]	0	99.325	29	23	87	19	902	100.8	8.07	160.81	23	cell-cell signaling;transport;signal transduction;other biological processes	plasma membrane;other membranes;other cell component	transporter activity;other molecular function	Pf00060, Pf01094, Pf10613	14802	ENSMUSG00000025892	Gria4	mmu:14802; Q6P9M7; Q9Z2W8		Unblocking of NMDA receptors, glutamate binding and activation; Synaptic adhesion-like molecules; Trafficking of GluR2-containing AMPA receptors; Activation of AMPA receptors	5	3	3.366	1		1
34	High	Master Protein	Q61625	Glutamate receptor ionotropic, delta-2 [OS=Mus musculus]	0	87.471	26	21	55	21	1007	113	6.1	116.2	21	cell adhesion;cell-cell signaling;cell organization and biogenesis;transport;developmental processes;signal transduction;other biological processes	plasma membrane;other membranes;other cell component	transporter activity;other molecular function	Pf00060, Pf01094, Pf10613	14804	ENSMUSG00000071424	Grid2	A4QPG1; mmu:14804; Q61625			0	0	3.293	1		1
35	High	Master Protein	Q9QUP5	Hyaluronan and proteoglycan link protein 1 [OS=Mus musculus]	0	28.887	24	8	26	8	356	40.5	7.8	36	8	cell adhesion;developmental processes;other biological processes	non-structural extracellular;extracellular matrix;other cell component	other molecular function	Pf00193, Pf07686	12950	ENSMUSG00000021613	Hapln1	mmu:12950; Q9D1G9; Q9QUP5; Q9Z1X7		ECM proteoglycans	1	0	3.231	1		0
36	High	Master Protein	Q9JMB8	Contactin-6 [OS=Mus musculus]	0	9.624	5	4	8	4	1028	113.7	6.64	8.58	4	cell adhesion;cell organization and biogenesis;developmental processes;signal transduction;other biological processes	plasma membrane;other membranes;other cell component	other molecular function	Pf00041, Pf07679, Pf13927	53870	ENSMUSG00000030092	Cntn6	mmu:53870; Q8C6X1; Q9JMB8			0	0	3.176	1		0
37	High	Master Protein	P56564	Excitatory amino acid transporter 1 [OS=Mus musculus]	0	40.282	12	5	37	4	543	59.6	8.4	61.72	5	other metabolic processes;stress response;transport;developmental processes;other biological processes	plasma membrane;other membranes;mitochondrion;other cell component	transporter activity;other molecular function	Pf00375	20512	ENSMUSG00000005360	Slc1a3	mmu:20512; P56564; Q99P53		Glutamate Neurotransmitter Release Cycle; Transport of inorganic cations/anions and amino acids/oligopeptides; Astrocytic Glutamate-Glutamine Uptake And Metabolism	3	2	3.149	1		0
38	High	Master Protein	Q56A07	Sodium channel subunit beta-2 [OS=Mus musculus]	0	15.83	27	4	8	4	215	24.2	6.54	11.19	4	other metabolic processes;stress response;transport;developmental processes;other biological processes	plasma membrane;other membranes	transporter activity;other molecular function	Pf07686	72821	ENSMUSG00000070304	Scn2b	mmu:72821; Q56A07			0	0	3.123	1		1
39	High	Master Protein	Q9Z2W9	Glutamate receptor 3 [OS=Mus musculus]	0	29.864	13	8	16	4	888	100.5	8.38	24.95	8	cell-cell signaling;transport;signal transduction;other biological processes	non-structural extracellular;plasma membrane;other membranes;other cell component	transporter activity;other molecular function	Pf00060, Pf01094, Pf10613	53623	ENSMUSG00000001986	Gria3	A2VDF4; mmu:53623; Q5DTJ0; Q9Z2W9		Unblocking of NMDA receptors, glutamate binding and activation; Synaptic adhesion-like molecules; Trafficking of GluR2-containing AMPA receptors; Activation of AMPA receptors	5	0	3.054	1		1
40	High	Master Protein	Q62059	Versican core protein [OS=Mus musculus]	0	20.169	2	4	11	4	3357	366.6	4.64	18.09	4	cell adhesion;developmental processes;other biological processes	non-structural extracellular;extracellular matrix;other cell component	other molecular function	Pf00008, Pf00059, Pf00084, Pf00193, Pf07686			Vcan	Q62058; Q62059; Q9CUU0		ECM proteoglycans; A tetrasaccharide linker sequence is required for GAG synthesis; Regulation of Insulin-like Growth Factor (IGF) transport and uptake by Insulin-like Growth Factor Binding Proteins (IGFBPs); Post-translational protein phosphorylation; Chondroitin sulfate biosynthesis; CS/DS degradation; Dermatan sulfate biosynthesis	7	0	3.041	1		0
41	High	Master Protein	Q8BYI9	Tenascin-R [OS=Mus musculus]	0	105.869	27	24	93	24	1358	149.5	4.94	210.79	24	cell adhesion;cell-cell signaling;cell organization and biogenesis;stress response;developmental processes;other biological processes	non-structural extracellular;extracellular matrix;other membranes;other cell component	signal transduction activity or receptor binding;other molecular function	Pf00041, Pf00147, Pf18720	21960	ENSMUSG00000015829	Tnr	A2RT70; mmu:21960; O88717; Q8BYI9	Focal adhesion: PI3K-Akt-mTOR signaling pathway; Focal adhesion	ECM proteoglycans	3	0	2.954	1		0
42	High	Master Protein	Q61361	Brevican core protein [OS=Mus musculus]	0	17.585	11	9	17	9	883	95.8	4.93	13.99	9	cell adhesion;cell organization and biogenesis;developmental processes;other biological processes	non-structural extracellular;extracellular matrix;other cell component	other molecular function	Pf00008, Pf00059, Pf00084, Pf00193, Pf07686	12032	ENSMUSG00000004892	Bcan	mmu:12032; Q61361; Q80WT7	Spinal cord injury	ECM proteoglycans; A tetrasaccharide linker sequence is required for GAG synthesis; Chondroitin sulfate biosynthesis; Degradation of the extracellular matrix; CS/DS degradation; Dermatan sulfate biosynthesis	7	0	2.777	1		0
43	High	Master Protein	P70663	SPARC-like protein 1 [OS=Mus musculus]	0	12.851	8	4	7	4	650	72.2	4.6	7.3	4	cell adhesion;cell organization and biogenesis;signal transduction;other biological processes	non-structural extracellular;extracellular matrix;other cell component	other molecular function	Pf07648, Pf09289, Pf10591	13602	ENSMUSG00000029309	Sparcl1	E9QPH2; mmu:13602; P70663; P97810; Q99L82		Regulation of Insulin-like Growth Factor (IGF) transport and uptake by Insulin-like Growth Factor Binding Proteins (IGFBPs); Post-translational protein phosphorylation	2	0	2.741	1		0
44	High	Master Protein	P43006	Excitatory amino acid transporter 2 [OS=Mus musculus]	0	39.688	20	8	23	8	572	62	6.68	52.45	8	cell organization and biogenesis;other metabolic processes;stress response;transport;developmental processes;other biological processes	plasma membrane;other membranes;other cell component	transporter activity;other molecular function	Pf00375	20511	ENSMUSG00000005089	Slc1a2	mmu:20511; O35877; O54686; O54687; P43006	Oxidative stress and redox pathway	Glutamate Neurotransmitter Release Cycle; Transport of inorganic cations/anions and amino acids/oligopeptides; Astrocytic Glutamate-Glutamine Uptake And Metabolism	4	0	2.728	1		0
45	High	Master Protein	O54991	Contactin-associated protein 1 [OS=Mus musculus]	0	83.537	22	25	62	25	1385	156.2	7.06	118.04	25	cell adhesion;cell organization and biogenesis;developmental processes;other biological processes	plasma membrane;other membranes;other cell component	other molecular function	Pf00754, Pf02210	53321	ENSMUSG00000017167	Cntnap1	A2A4K6; mmu:53321; O54991			0	0	2.669	1		0
46	High	Master Protein	P10126	Elongation factor 1-alpha 1 [OS=Mus musculus]	0	16.506	12	5	14	5	462	50.1	9.01	23.14	5	protein metabolism;other metabolic processes;other biological processes	plasma membrane;other membranes;cytosol;cytoskeleton;nucleus;other cell component	nucleic acid binding activity;other molecular function	Pf00009, Pf03143, Pf03144	13627	ENSMUSG00000037742	Eef1a1	mmu:13627; P10126; Q61511; Q6ZWN2; Q8BMB8; Q8BVS8; Q99KU5	Translation factors; EGFR1 signaling pathway	Neutrophil degranulation; Eukaryotic Translation Elongation; HSF1 activation; Protein methylation	6	0	2.193	1		0
47	High	Master Protein	P84091	AP-2 complex subunit mu [OS=Mus musculus]	0	12.055	11	5	10	5	435	49.6	9.54	13.94	5	cell organization and biogenesis;transport;other biological processes	plasma membrane;other membranes;other cell component	signal transduction activity or receptor binding;other molecular function	Pf00928, Pf01217	11773	ENSMUSG00000022841	Ap2m1	mmu:11773; P20172; P53679; P84091		Cargo recognition for clathrin-mediated endocytosis; VLDLR internalisation and degradation; MHC class II antigen presentation; Recycling pathway of L1; LDL clearance; Trafficking of GluR2-containing AMPA receptors; Retrograde neurotrophin signalling; Formation of annular gap junctions; WNT5A-dependent internalization of FZD4; WNT5A-dependent internalization of FZD2, FZD5 and ROR2	12	0	2.086	1		1
48	High	Master Protein	P61205	ADP-ribosylation factor 3 [OS=Mus musculus]	0	22.621	47	6	14	6	181	20.6	7.43	28.35	6	transport	plasma membrane;other membranes;ER/Golgi;other cell component	other molecular function	Pf00025	11842	ENSMUSG00000051853	Arf3	mmu:11842; P16587; P61205		COPI-dependent Golgi-to-ER retrograde traffic; COPI-mediated anterograde transport; Synthesis of PIPs at the Golgi membrane	3	0	2.082	1		0
49	High	Master Protein	P63001	Ras-related C3 botulinum toxin substrate 1 [OS=Mus musculus]	0	9.916	23	4	9	4	192	21.4	8.5	5.91	4	cell adhesion;cell-cell signaling;cell cycle OR cell proliferation;cell organization and biogenesis;stress response;transport;developmental processes;signal transduction;other biological processes	plasma membrane;other membranes;cytosol;cytoskeleton;ER/Golgi;nucleus;other cytoplasmic organelle;other cell component	other molecular function	Pf00071	19353	ENSMUSG00000001847	Rac1	mmu:19353; O95501; P15154; P63001; Q9BTB4	IL-5 signaling pathway; MicroRNAs in cardiomyocyte hypertrophy; BDNF pathway; Chemokine signaling pathway; G13 signaling pathway; p38 Mapk signaling pathway; Microglia pathogen phagocytosis pathway; IL-3 signaling pathway; Robo4 and VEGF signaling pathways crosstalk; IL-6 signaling pathway; Wnt signaling pathway; Oxidative stress and redox pathway; Alpha 6 beta 4 integrin signaling pathway; Mapk …	Regulation of actin dynamics for phagocytic cup formation; FCERI mediated MAPK activation; Neutrophil degranulation; RHO GTPases Activate Formins; RHO GTPases activate IQGAPs; PIP3 activates AKT signaling; PI5P, PP2A and IER3 Regulate PI3K/AKT Signaling; Signaling by SCF-KIT; NTRK2 activates RAC1; Signal transduction by L1; RAC1 GTPase cycle; NRAGE signals death through JNK; Factors involved in m…	57	0	2.036	1		0
50	High	Master Protein	Q9R0K7	Plasma membrane calcium-transporting ATPase 2 [OS=Mus musculus]	0	29.403	10	9	24	9	1198	132.5	5.96	24.62	9	cell organization and biogenesis;other metabolic processes;transport;developmental processes;other biological processes	plasma membrane;other membranes;ER/Golgi;other cell component	signal transduction activity or receptor binding;transporter activity;other molecular function	Pf00122, Pf00689, Pf00690, Pf08282, Pf12424, Pf13246	11941	ENSMUSG00000030302	Atp2b2	mmu:11941; O88863; Q9R0K7	Calcium regulation in cardiac cells	Ion homeostasis; Ion transport by P-type ATPases; Reduction of cytosolic Ca++ levels	4	0	2.003	1	fold change >2	0
51	High	Master Protein	Q04447	Creatine kinase B-type [OS=Mus musculus]	0	18.131	17	5	12	5	381	42.7	5.67	17.47	5	other metabolic processes;developmental processes;other biological processes	cytosol;mitochondrion;nucleus;other cell component	kinase activity;other molecular function	Pf00217, Pf02807	12709	ENSMUSG00000001270	Ckb	mmu:12709; Q04447; Q3KQP4; Q3TKI3; Q3U5P5; Q3UF71; Q9CXK6		RND3 GTPase cycle; Creatine metabolism	2	0	1.994	1
52	High	Master Protein	P07758	Alpha-1-antitrypsin 1-1 [OS=Mus musculus]	0	10.13	9	4	13	4	413	46	5.72	3.76	4	protein metabolism;other metabolic processes;stress response;other biological processes	non-structural extracellular;ER/Golgi;other cell component	enzyme regulator activity;other molecular function	Pf00079	20700; 20703	ENSMUSG00000066366	Serpina1a	mmu:20700; P07758; Q3UJ47; Q80YB8; Q8JZV6; Q91XB8			0	0	1.956	1
53	High	Master Protein	P60710	Actin, cytoplasmic 1 [OS=Mus musculus]	0	38.817	33	10	33	4	375	41.7	5.48	65.29	10	cell organization and biogenesis;protein metabolism;other metabolic processes;developmental processes;other biological processes	plasma membrane;other membranes;cytosol;cytoskeleton;nucleus;other cell component	cytoskeletal activity;other molecular function	Pf00022	11461	ENSMUSG00000029580	Actb	mmu:11461; P02570; P60710; P70514; P99021; Q11211; Q3TI89; Q3TVP6; Q64316; Q6ZWM3	Myometrial relaxation and contraction pathways; Regulation of actin cytoskeleton; Focal adhesion	Regulation of actin dynamics for phagocytic cup formation; RHOBTB2 GTPase cycle; Interaction between L1 and Ankyrins; Recycling pathway of L1; MAP2K and MAPK activation; RHO GTPases Activate Formins; RHO GTPases activate IQGAPs; Clathrin-mediated endocytosis; EPHB-mediated forward signaling; Adherens junctions interactions; Formation of annular gap junctions; VEGFA-VEGFR2 Pathway; Cell-extracellu…	18	6	1.951	1
54	High	Master Protein	O08599	Syntaxin-binding protein 1 [OS=Mus musculus]	0	30.928	18	8	24	8	594	67.5	6.96	37.92	8	cell adhesion;cell-cell signaling;cell organization and biogenesis;stress response;transport;developmental processes;other biological processes	plasma membrane;other membranes;cytosol;cytoskeleton;nucleus;other cell component	other molecular function	Pf00995	20910	ENSMUSG00000026797	Stxbp1	A2ARS2; A2ARS3; A2ARS4; mmu:20910; O08599; Q5WAC6; Q8VD51	EGFR1 signaling pathway; Insulin signaling	Dopamine Neurotransmitter Release Cycle; Serotonin Neurotransmitter Release Cycle; Norepinephrine Neurotransmitter Release Cycle; Glutamate Neurotransmitter Release Cycle; Acetylcholine Neurotransmitter Release Cycle; GABA synthesis, release, reuptake and degradation	8	0	1.942	1
55	High	Master Protein	P63011	Ras-related protein Rab-3A [OS=Mus musculus]	0	15.148	33	6	16	5	220	25	5.03	30.63	6	cell-cell signaling;cell organization and biogenesis;stress response;transport;developmental processes;other biological processes	plasma membrane;other membranes;cytosol;ER/Golgi;other cytoplasmic organelle;other cell component	cytoskeletal activity;other molecular function	Pf00071	19339	ENSMUSG00000031840	Rab3a	mmu:19339; P05713; P63011; Q3TSL4		Dopamine Neurotransmitter Release Cycle; Serotonin Neurotransmitter Release Cycle; Norepinephrine Neurotransmitter Release Cycle; Glutamate Neurotransmitter Release Cycle; Acetylcholine Neurotransmitter Release Cycle; GABA synthesis, release, reuptake and degradation; Neutrophil degranulation; RAB GEFs exchange GTP for GDP on RABs; RAB geranylgeranylation	9	1	1.861	1
56	High	Master Protein	P16125	L-lactate dehydrogenase B chain [OS=Mus musculus]	0	14.913	23	7	22	6	334	36.5	6.05	23.48	7	other metabolic processes	other membranes;cytosol;mitochondrion;other cell component	other molecular function	Pf00056, Pf02866	16832	ENSMUSG00000030246	Ldhb	mmu:16832; P16125; Q545Y4	Glycolysis and gluconeogenesis	Pyruvate metabolism	2	1	1.847	1
57	High	Master Protein	P14231	Sodium/potassium-transporting ATPase subunit beta-2 [OS=Mus musculus]	0	19.459	22	4	13	4	290	33.3	8.31	23.4	4	cell adhesion;cell organization and biogenesis;transport;developmental processes;other biological processes	plasma membrane;other membranes;other cell component	transporter activity;other molecular function	Pf00287	11932	ENSMUSG00000041329	Atp1b2	mmu:11932; P14231	Calcium regulation in cardiac cells	Ion homeostasis; Ion transport by P-type ATPases	3	0	1.835	1
58	High	Master Protein	Q60930	Voltage-dependent anion-selective channel protein 2 [OS=Mus musculus]	0	19.886	21	5	16	5	295	31.7	7.49	40.12	5	cell organization and biogenesis;transport;signal transduction;other biological processes	other membranes;cytoskeleton;mitochondrion;ER/Golgi;other cell component	transporter activity;other molecular function	Pf01459	22334	ENSMUSG00000021771	Vdac2	mmu:22334; Q60930; Q78MH6; Q99L98		Ub-specific processing proteases	1	0	1.808	1
59	High	Master Protein	Q7TMM9	Tubulin beta-2A chain [OS=Mus musculus]	0	60.067	47	16	59	4	445	49.9	4.89	108.07	16	cell cycle OR cell proliferation;cell organization and biogenesis;developmental processes	cytoskeleton;other cell component	cytoskeletal activity;other molecular function	Pf00091, Pf03953	22151	ENSMUSG00000058672	Tubb2a	mmu:22151; Q7TMM9		COPI-dependent Golgi-to-ER retrograde traffic; Kinesins; MHC class II antigen presentation; COPI-mediated anterograde transport; Separation of Sister Chromatids; Resolution of Sister Chromatid Cohesion; Recruitment of NuMA to mitotic centrosomes; RHO GTPases Activate Formins; EML4 and NUDC in mitotic spindle formation; Carboxyterminal post-translational modifications of tubulin; Microtubule-depen…	22	0	1.802	1
60	High	Master Protein	Q60932	Voltage-dependent anion-selective channel protein 1 [OS=Mus musculus]	0	27.762	39	8	31	7	296	32.3	8.43	60.08	8	cell-cell signaling;other metabolic processes;stress response;transport;other biological processes	plasma membrane;other membranes;mitochondrion;ER/Golgi;other cell component	transporter activity;other molecular function	Pf01459	22333	ENSMUSG00000020402	Vdac1	B1ASZ9; mmu:22333; Q5SVC6; Q60932		Ub-specific processing proteases; PINK1-PRKN Mediated Mitophagy; Pyruvate metabolism	3	1	1.755	1
61	High	Master Protein	Q6PIC6	Sodium/potassium-transporting ATPase subunit alpha-3 [OS=Mus musculus]	0	81.426	30	24	67	12	1013	111.6	5.41	93.56	24	cell organization and biogenesis;transport;signal transduction;other biological processes	plasma membrane;other membranes;ER/Golgi;nucleus;other cell component	signal transduction activity or receptor binding;transporter activity;other molecular function	Pf00122, Pf00689, Pf00690, Pf13246	232975	ENSMUSG00000040907	Atp1a3	mmu:232975; Q6PIC6		Ion homeostasis; Ion transport by P-type ATPases	2	10	1.754	1
62	High	Master Protein	P16858	Glyceraldehyde-3-phosphate dehydrogenase [OS=Mus musculus]	0	59.183	40	8	47	8	333	35.8	8.25	145.31	8	cell organization and biogenesis;protein metabolism;other metabolic processes;stress response;signal transduction;other biological processes	plasma membrane;other membranes;cytosol;cytoskeleton;nucleus;other cytoplasmic organelle;other cell component	enzyme regulator activity;cytoskeletal activity;other molecular function	Pf00044, Pf02800	14433	ENSMUSG00000057666	Gapdh	A6H6A8; mmu:14433; P16858; Q0QEU0; Q3THM2; Q3TUI2; Q3UMT2; Q4V783; Q569X2; Q569X5; Q5U410	Glycolysis and gluconeogenesis	Gluconeogenesis; Glycolysis	3	0	1.743	1
63	High	Master Protein	P48962	ADP/ATP translocase 1 [OS=Mus musculus]	0	36.379	38	12	54	5	298	32.9	9.72	75.04	12	cell organization and biogenesis;other metabolic processes;transport;other biological processes	other membranes;mitochondrion	transporter activity;other molecular function	Pf00153	11739	ENSMUSG00000031633	Slc25a4	mmu:11739; P48962; Q62164	Electron transport chain; mRNA processing	Transport of nucleosides and free purine and pyrimidine bases across the plasma membrane	3	0	1.739	1
64	High	Master Protein	P51881	ADP/ATP translocase 2 [OS=Mus musculus]	0	37.334	38	12	58	5	298	32.9	9.73	79.4	12	cell cycle OR cell proliferation;cell organization and biogenesis;other metabolic processes;transport;other biological processes	other membranes;cytoskeleton;mitochondrion	transporter activity;other molecular function	Pf00153	11740	ENSMUSG00000016319	Slc25a5	mmu:11740; P51881; Q61311	Electron transport chain	Transport of nucleosides and free purine and pyrimidine bases across the plasma membrane	2	7	1.734	1
65	High	Master Protein	P14106	Complement C1q subcomponent subunit B [OS=Mus musculus]	0	22.312	27	6	27	5	253	26.7	8.15	46.08	6	cell organization and biogenesis;stress response;other biological processes	non-structural extracellular;other cell component	other molecular function	Pf00386, Pf01391	12260	ENSMUSG00000036905	C1qb	mmu:12260; P14106; Q3U793	Oxidative damage response; Complement activation, classical pathway; Microglia pathogen phagocytosis pathway	Initial triggering of complement; Classical antibody-mediated complement activation; Regulation of Complement cascade	6	0	1.63	1
66	High	Master Protein	P16330	2',3'-cyclic-nucleotide 3'-phosphodiesterase [OS=Mus musculus]	0	50.791	41	14	55	14	420	47.1	8.97	108.62	14	cell organization and biogenesis;other metabolic processes;transport;developmental processes;other biological processes	non-structural extracellular;plasma membrane;other membranes;cytoskeleton;mitochondrion;other cell component	nucleic acid binding activity;other molecular function	Pf05881, Pf13671	12799	ENSMUSG00000006782	Cnp	mmu:12799; P16330; Q61424; Q8C7C9; Q91V42; Q923F3			0	0	1.624	1
67	High	Master Protein	P15105	Glutamine synthetase [OS=Mus musculus]	0	13.08	10	4	8	4	373	42.1	7.08	14.76	4	cell cycle OR cell proliferation;protein metabolism;other metabolic processes;stress response;developmental processes;other biological processes	plasma membrane;other membranes;cytosol;ER/Golgi;other cell component	other molecular function	Pf00120, Pf03951	14645	ENSMUSG00000026473	Glul	mmu:14645; P15105; Q3TRK7; Q64432; Q91VC6		Glutamate and glutamine metabolism; Astrocytic Glutamate-Glutamine Uptake And Metabolism	2	0	1.583	1
68	High	Master Protein	Q68FD5	Clathrin heavy chain 1 [OS=Mus musculus]	0	35.826	9	13	30	13	1675	191.4	5.69	42.9	13	cell cycle OR cell proliferation;cell organization and biogenesis;other metabolic processes;transport;other biological processes	plasma membrane;other membranes;cytosol;cytoskeleton;ER/Golgi;nucleus;other cytoplasmic organelle;other cell component	signal transduction activity or receptor binding;cytoskeletal activity;nucleic acid binding activity;other molecular function	Pf00637, Pf01394, Pf09268, Pf13838	67300	ENSMUSG00000047126	Cltc	mmu:67300; Q68FD5	IL-7 signaling pathway; Kit receptor signaling pathway	Cargo recognition for clathrin-mediated endocytosis; VLDLR internalisation and degradation; MHC class II antigen presentation; Golgi Associated Vesicle Biogenesis; Lysosome Vesicle Biogenesis; Recycling pathway of L1; LDL clearance; Retrograde neurotrophin signalling; Formation of annular gap junctions; WNT5A-dependent internalization of FZD4; WNT5A-dependent internalization of FZD2, FZD5 and ROR…	17	0	1.562	1
69	High	Master Protein	P97427	Dihydropyrimidinase-related protein 1 [OS=Mus musculus]	0	11.043	8	4	10	4	572	62.1	7.12	8.9	4	signal transduction;other biological processes	cytosol;cytoskeleton;nucleus;other cell component	cytoskeletal activity;other molecular function	Pf01979	12933	ENSMUSG00000029121	Crmp1	mmu:12933; O08554; O35097; P97427		CRMPs in Sema3A signaling	1	0	1.522	1
70	High	Master Protein	O55143	Sarcoplasmic/endoplasmic reticulum calcium ATPase 2 [OS=Mus musculus]	0	7.827	5	4	6	4	1044	114.8	5.34	2.41	4	cell organization and biogenesis;other metabolic processes;stress response;transport;signal transduction;other biological processes	plasma membrane;other membranes;cytosol;ER/Golgi;other cell component	signal transduction activity or receptor binding;transporter activity;other molecular function	Pf00122, Pf00689, Pf00690, Pf08282, Pf13246	11938	ENSMUSG00000029467	Atp2a2	mmu:11938; O55143; Q9R2A9; Q9WUT5	Alzheimer's disease; Myometrial relaxation and contraction pathways; Calcium regulation in cardiac cells	Ion homeostasis; Ion transport by P-type ATPases; Reduction of cytosolic Ca++ levels	6	0	1.509	1
71	High	Master Protein	P60202	Myelin proteolipid protein [OS=Mus musculus]	0	20.821	23	6	45	6	277	30.1	8.35	85.17	6	cell organization and biogenesis;other metabolic processes;stress response;developmental processes;signal transduction;other biological processes	plasma membrane;other membranes;other cell component	other molecular function	Pf01275	18823	ENSMUSG00000031425	Plp1	mmu:18823; P04400; P06905; P60202; Q9WUS9			0	0	1.496	1
72	High	Master Protein	P52480	Pyruvate kinase PKM [OS=Mus musculus]	0	26.478	22	8	20	8	531	57.8	7.47	23.21	8	cell organization and biogenesis;RNA metabolism OR transcription;other metabolic processes;developmental processes;other biological processes	cytosol;ER/Golgi;nucleus;other cell component	nucleic acid binding activity;kinase activity;other molecular function	Pf00224, Pf02887	18746	ENSMUSG00000032294	Pkm	mmu:18746; P52480; Q3TBV8; Q3TBW5; Q3TC59; Q3U1X3; Q3U5P6; Q4VC20; Q64484; Q91YI8; Q9CWB1	Glycolysis and gluconeogenesis; Purine metabolism	Neutrophil degranulation; Glycolysis	4	0	1.383	1
73	High	Master Protein	P43274	Histone H1.4 [OS=Mus musculus]	0	12.812	15	4	25	4	219	22	11.11	52.58	4	cell organization and biogenesis;protein metabolism;other metabolic processes;other biological processes	nucleus;other cell component	nucleic acid binding activity;other molecular function	Pf00538	50709	ENSMUSG00000051627	H1-4	mmu:50709; P43274; Q5EBH3		Formation of Senescence-Associated Heterochromatin Foci (SAHF); Apoptosis induced DNA fragmentation	2	0	1.381	1
74	High	Master Protein	P01027	Complement C3 [OS=Mus musculus]	0	16.311	4	5	12	5	1663	186.4	6.73	26.32	5	cell-cell signaling;cell organization and biogenesis;protein metabolism;other metabolic processes;stress response;developmental processes;signal transduction;other biological processes	non-structural extracellular;plasma membrane;other membranes;other cell component	signal transduction activity or receptor binding;enzyme regulator activity;other molecular function	Pf00207, Pf01759, Pf01821, Pf01835, Pf07677, Pf07678, Pf07703, Pf17789, Pf17790, Pf17791	12266	ENSMUSG00000024164	C3	mmu:12266; P01027; Q61370; Q80XP1	Complement activation, classical pathway; Tyrobp causal network in microglia; Comprehensive IL-17A signaling	Neutrophil degranulation; Immunoregulatory interactions between a Lymphoid and a non-Lymphoid cell; Regulation of Complement cascade; Regulation of Insulin-like Growth Factor (IGF) transport and uptake by Insulin-like Growth Factor Binding Proteins (IGFBPs); Post-translational protein phosphorylation; G alpha (i) signalling events; Peptide ligand-binding receptors; Alternative complement activati…	12	0	1.352	1
75	High	Master Protein	P28665	Murinoglobulin-1 [OS=Mus musculus]	0	32.946	10	11	34	11	1476	165.2	6.42	31.25	11	developmental processes;other biological processes	non-structural extracellular	enzyme regulator activity;other molecular function	Pf00207, Pf01835, Pf07677, Pf07678, Pf07703, Pf17789, Pf17791	17836	ENSMUSG00000059908	Mug1	mmu:17836; P28665; Q3UNE7; Q80XE6			0	0	1.339	1
76	High	Master Protein	Q61545	RNA-binding protein EWS [OS=Mus musculus]	0	75.479	16	9	80	9	655	68.4	9.33	189.82	9	RNA metabolism OR transcription;other biological processes	plasma membrane;other membranes;nucleus;other cell component	nucleic acid binding activity;other molecular function	Pf00076, Pf00641	14030	ENSMUSG00000009079	Ewsr1	mmu:14030; Q61545; Q9D2P0	Mechanisms associated with pluripotency; mRNA processing		2	0	1.297	1
77	High	Master Protein	P68040	Receptor of activated protein C kinase 1 [OS=Mus musculus]	0	16.677	22	5	8	5	317	35.1	7.69	9	5	cell cycle OR cell proliferation;protein metabolism;other metabolic processes;developmental processes;signal transduction;other biological processes	plasma membrane;cytosol;mitochondrion;translational apparatus;nucleus;other cell component	signal transduction activity or receptor binding;enzyme regulator activity;translation activity;other molecular function	Pf00400	14694	ENSMUSG00000020372	Rack1	mmu:14694; P25388; P68040; P99049; Q3THP0; Q3THY7; Q3TKQ0; Q3TW88; Q5NCC5; Q5NCC6; Q9CSQ0; Q9ERM6	IL-3 signaling pathway; IL-2 signaling pathway	Regulation of TNFR1 signaling; TNFR1-induced NF-kappa-B signaling pathway; TNFR1-mediated ceramide production	5	0	1.277	1
78	High	Master Protein	P28651	Carbonic anhydrase-related protein [OS=Mus musculus]	0	26.397	30	6	27	6	291	33.1	4.78	48.09	6	signal transduction	other cell component	other molecular function	Pf00194	12319	ENSMUSG00000041261	Ca8	mmu:12319; P28651; Q8CF58; Q91XF6			0	0	1.262	1
79	High	Master Protein	P35700	Peroxiredoxin-1 [OS=Mus musculus]	0	13.366	30	5	16	5	199	22.2	8.12	19.97	5	cell cycle OR cell proliferation;other metabolic processes;stress response;other biological processes	cytosol;mitochondrion;nucleus;other cytoplasmic organelle;other cell component	other molecular function	Pf00578, Pf10417	18477	ENSMUSG00000028691	Prdx1	mmu:18477; P35700; Q3UBV4; Q9CWI2	Oxidative stress and redox pathway	TP53 Regulates Metabolic Genes; Detoxification of Reactive Oxygen Species; NFE2L2 regulating anti-oxidant/detoxification enzymes	4	0	1.257	1
80	High	Master Protein	Q9Z1X4	Interleukin enhancer-binding factor 3 [OS=Mus musculus]	0	51.189	20	16	59	16	898	96	8.76	65.21	16	protein metabolism;other metabolic processes;stress response;other biological processes	mitochondrion;nucleus;other cell component	nucleic acid binding activity;other molecular function	Pf00035, Pf07528	16201	ENSMUSG00000032178	Ilf3	mmu:16201; Q80VD5; Q812A1; Q8BP80; Q8C2H8; Q8K588; Q9Z1X4	mRNA processing	Regulation of CDH11 gene transcription	2	0	1.134	1
81	High	Master Protein	P49312	Heterogeneous nuclear ribonucleoprotein A1 [OS=Mus musculus]	0	40.105	28	9	40	5	320	34.2	9.23	75.25	9	RNA metabolism OR transcription;other metabolic processes;transport;other biological processes	cytosol;nucleus;other cell component	nucleic acid binding activity;other molecular function	Pf00076, Pf11627	15382	ENSMUSG00000046434	Hnrnpa1	mmu:15382; P49312; P97312; Q3V269	mRNA processing	mRNA Splicing - Major Pathway; Processing of Capped Intron-Containing Pre-mRNA; FGFR2 alternative splicing	4	0	1.125	1
82	High	Master Protein	P56959	RNA-binding protein FUS [OS=Mus musculus]	0	94.123	17	11	202	11	518	52.6	9.36	490.73	11	cell organization and biogenesis;protein metabolism;RNA metabolism OR transcription;other metabolic processes;other biological processes	nucleus;other cell component	signal transduction activity or receptor binding;cytoskeletal activity;nucleic acid binding activity;other molecular function	Pf00076, Pf00641	233908	ENSMUSG00000030795	Fus	mmu:233908; P56959	mRNA processing	mRNA Splicing - Major Pathway; Processing of Capped Intron-Containing Pre-mRNA	3	0	1.094	1
83	High	Master Protein	Q9Z130	Heterogeneous nuclear ribonucleoprotein D-like [OS=Mus musculus]	0	61.033	30	12	63	10	301	33.5	7.31	149.37	12	RNA metabolism OR transcription;other metabolic processes;other biological processes	nucleus;other cell component	nucleic acid binding activity	Pf00076			Hnrnpdl	Q9CT01; Q9Z130			0	2	1.071	1
84	High	Master Protein	O70133	ATP-dependent RNA helicase A [OS=Mus musculus]	0	15.871	4	5	10	5	1380	149.4	6.83	4.2	5	cell organization and biogenesis;RNA metabolism OR transcription;other metabolic processes;stress response;transport;other biological processes	cytosol;cytoskeleton;translational apparatus;nucleus;other cell component	translation activity;nucleic acid binding activity;other molecular function	Pf00035, Pf00270, Pf00271, Pf04408, Pf07717	13211		Dhx9	mmu:13211; O35931; O54703; O70133; Q5FWY1; Q6R5F7; Q9CSA2	Mechanisms associated with pluripotency; mRNA processing	mRNA Splicing - Major Pathway; RIP-mediated NFkB activation via ZBP1; DEx/H-box helicases activate type I IFN and inflammatory cytokines production	5	0	1.056	1
85	High	Master Protein	Q8BG05	Heterogeneous nuclear ribonucleoprotein A3 [OS=Mus musculus]	0	77.613	42	16	102	14	379	39.6	9.01	182.75	16	RNA metabolism OR transcription;other metabolic processes;transport	nucleus;other cell component	transporter activity;nucleic acid binding activity	Pf00076	229279	ENSMUSG00000059005	Hnrnpa3	mmu:229279; Q8BG05; Q8BHF8	mRNA processing	mRNA Splicing - Major Pathway; Processing of Capped Intron-Containing Pre-mRNA	3	0	0.979	1
86	High	Master Protein	Q99020	Heterogeneous nuclear ribonucleoprotein A/B [OS=Mus musculus]	0	27.271	32	8	29	7	285	30.8	7.91	34.13	8	RNA metabolism OR transcription;other metabolic processes;other biological processes	cytosol;nucleus;other cell component	nucleic acid binding activity;other molecular function	Pf00076, Pf08143	15384	ENSMUSG00000020358	Hnrnpab	mmu:15384; Q8BPE0; Q99020	mRNA processing		1	0	0.921	1
87	High	Master Protein	Q7TMK9	Heterogeneous nuclear ribonucleoprotein Q [OS=Mus musculus]	0	16.17	10	6	23	6	623	69.6	8.59	15.86	6	RNA metabolism OR transcription;other metabolic processes;stress response;other biological processes	other membranes;cytosol;ER/Golgi;nucleus;other cell component	nucleic acid binding activity	Pf00076, Pf18360	56403	ENSMUSG00000032423	Syncrip	mmu:56403; O88991; Q2YDV8; Q68ED6; Q7TMK9; Q80YV6; Q8BGP1; Q8C5K6; Q8CGC2; Q91ZR0; Q99KU9; Q9QYF4	mRNA processing		1	0	0.883	1
88	High	Master Protein	O88569	Heterogeneous nuclear ribonucleoproteins A2/B1 [OS=Mus musculus]	0	77.87	45	18	101	14	353	37.4	8.95	212.77	18	cell organization and biogenesis;DNA metabolism;RNA metabolism OR transcription;other metabolic processes;transport;other biological processes	non-structural extracellular;cytosol;nucleus;other cell component	nucleic acid binding activity;other molecular function	Pf00076, Pf11627	53379	ENSMUSG00000004980	Hnrnpa2b1	B9EJ02; mmu:53379; O88569; Q3UVJ5; Q6PCV9; Q8C2A0; Q8CJ71; Q91ZR9; Q9R204	mRNA processing	mRNA Splicing - Major Pathway; Processing of Capped Intron-Containing Pre-mRNA	3	4	0.837	1
89	High	Master Protein	Q60668	Heterogeneous nuclear ribonucleoprotein D0 [OS=Mus musculus]	0	54.504	28	11	62	9	355	38.3	7.81	124.85	11	RNA metabolism OR transcription;other metabolic processes;developmental processes;other biological processes	cytosol;nucleus;other cell component	nucleic acid binding activity;other molecular function	Pf00076, Pf08143	11991	ENSMUSG00000000568	Hnrnpd	mmu:11991; Q60667; Q60668; Q80ZJ0; Q91X94	mRNA processing	mRNA Splicing - Major Pathway; Processing of Capped Intron-Containing Pre-mRNA; AUF1 (hnRNP D0) binds and destabilizes mRNA	4	0	0.778	1

## Sheet: hit proteins
No.	Accession	Description	Biological Process	Cellular Component	Molecular Function	Pfam IDs	Entrez Gene ID	Ensembl Gene ID	Gene Symbol	Gene ID	WikiPathways	Reactome Pathways
1	Q80TS3	Adhesion G protein-coupled receptor L3 [OS=Mus musculus]	cell adhesion;cell organization and biogenesis;developmental processes;signal transduction;other biological processes	plasma membrane;other membranes;other cell component	other molecular function	Pf00002, Pf01825, Pf02140, Pf02191, Pf02354, Pf16489	319387	ENSMUSG00000037605	Adgrl3	mmu:319387; Q3UHI7; Q3UM79; Q504Z9; Q5HZJ6; Q80T56; Q80TS3	GPCRs, non-odorant ; GPCRs, class B secretin-like
2	P84091	AP-2 complex subunit mu [OS=Mus musculus]	cell organization and biogenesis;transport;other biological processes	plasma membrane;other membranes;other cell component	signal transduction activity or receptor binding;other molecular function	Pf00928, Pf01217	11773	ENSMUSG00000022841	Ap2m1	mmu:11773; P20172; P53679; P84091		Cargo recognition for clathrin-mediated endocytosis; VLDLR internalisation and degradation; MHC class II antigen presentation; Recycling pathway of L1; LDL clearance; Trafficking of GluR2-containing AMPA receptors; Retrograde neurotrophin signalling; Formation of annular gap junctions; WNT5A-dependent internalization of FZD4; WNT5A-dependent internalization of FZD2, FZD5 and ROR2
3	P15209	BDNF/NT-3 growth factors receptor [OS=Mus musculus]	cell-cell signaling;protein metabolism;other metabolic processes;transport;developmental processes;signal transduction;other biological processes	plasma membrane;other membranes;cytosol;ER/Golgi;other cytoplasmic organelle;other cell component	signal transduction activity or receptor binding;kinase activity;other molecular function	Pf07679, Pf07714, Pf13855, Pf16920	18212	ENSMUSG00000055254	Ntrk2	mmu:18212; P15209; Q3TUF9; Q80WU0; Q91XJ9	BDNF pathway	Activated NTRK2 signals through PLCG1; Activated NTRK2 signals through FRS2 and FRS3; NTRK2 activates RAC1
4	Q9R171	Cerebellin-1 [OS=Mus musculus]	cell adhesion;cell organization and biogenesis;transport;developmental processes;other biological processes	non-structural extracellular;plasma membrane;other membranes;other cell component	other molecular function	Pf00386	12404	ENSMUSG00000031654	Cbln1	mmu:12404; P28655; Q9QVT5; Q9R171
5	Q9JHG0	Cerebellin-3 [OS=Mus musculus]	cell organization and biogenesis	non-structural extracellular;ER/Golgi;other cell component		Pf00386	56410	ENSMUSG00000040380	Cbln3	mmu:56410; Q9JHG0
6	O88507	Ciliary neurotrophic factor receptor subunit alpha [OS=Mus musculus]	signal transduction;other biological processes	non-structural extracellular;plasma membrane;other membranes	signal transduction activity or receptor binding;other molecular function	Pf00041	12804	ENSMUSG00000028444	Cntfr	mmu:12804; O88507; Q80T01	Delta-Notch signaling pathway; Adipogenesis genes	IL-6-type cytokine receptor ligand interactions
7	Q9CPW0	Contactin-associated protein-like 2 [OS=Mus musculus]	cell adhesion;cell-cell signaling;cell cycle OR cell proliferation;cell organization and biogenesis;other metabolic processes;stress response;developmental processes;signal transduction;other biological processes	plasma membrane;other membranes;ER/Golgi;other cytoplasmic organelle;other cell component	other molecular function	Pf00754, Pf02210	66797	ENSMUSG00000039419	Cntnap2	mmu:66797; Q6P2K4; Q6ZQ31; Q9CPW0
8	Q80T41	Gamma-aminobutyric acid type B receptor subunit 2 [OS=Mus musculus]	cell-cell signaling;signal transduction	plasma membrane;other membranes;other cell component	other molecular function	Pf00003, Pf01094, Pf18455	242425	ENSMUSG00000039809	Gabbr2	A2AL05; mmu:242425; Q80T41	GPCRs, non-odorant ; Splicing factor NOVA regulated synaptic proteins; GPCRs, class C metabotropic glutamate, pheromone	G alpha (i) signalling events; Class C/3 (Metabotropic glutamate/pheromone receptors); Activation of G protein gated Potassium channels; Inhibition of voltage gated Ca2+ channels via Gbeta/gamma subunits; GABA B receptor activation
9	P23818	Glutamate receptor 1 [OS=Mus musculus]	cell-cell signaling;cell organization and biogenesis;transport;developmental processes;signal transduction;other biological processes	non-structural extracellular;plasma membrane;other membranes;cytosol;ER/Golgi;other cytoplasmic organelle;other cell component	signal transduction activity or receptor binding;transporter activity;cytoskeletal activity;other molecular function	Pf00060, Pf01094, Pf10613	14799	ENSMUSG00000020524	Gria1	mmu:14799; P23818		Synaptic adhesion-like molecules; COPII-mediated vesicle transport; Cargo concentration in the ER; Trafficking of GluR2-containing AMPA receptors; Unblocking of NMDA receptors, glutamate binding and activation; Activation of AMPA receptors
10	Q9Z2W9	Glutamate receptor 3 [OS=Mus musculus]	cell-cell signaling;transport;signal transduction;other biological processes	non-structural extracellular;plasma membrane;other membranes;other cell component	transporter activity;other molecular function	Pf00060, Pf01094, Pf10613	53623	ENSMUSG00000001986	Gria3	A2VDF4; mmu:53623; Q5DTJ0; Q9Z2W9		Unblocking of NMDA receptors, glutamate binding and activation; Synaptic adhesion-like molecules; Trafficking of GluR2-containing AMPA receptors; Activation of AMPA receptors
11	Q9Z2W8	Glutamate receptor 4 [OS=Mus musculus]	cell-cell signaling;transport;signal transduction;other biological processes	plasma membrane;other membranes;other cell component	transporter activity;other molecular function	Pf00060, Pf01094, Pf10613	14802	ENSMUSG00000025892	Gria4	mmu:14802; Q6P9M7; Q9Z2W8		Unblocking of NMDA receptors, glutamate binding and activation; Synaptic adhesion-like molecules; Trafficking of GluR2-containing AMPA receptors; Activation of AMPA receptors
12	Q61625	Glutamate receptor ionotropic, delta-2 [OS=Mus musculus]	cell adhesion;cell-cell signaling;cell organization and biogenesis;transport;developmental processes;signal transduction;other biological processes	plasma membrane;other membranes;other cell component	transporter activity;other molecular function	Pf00060, Pf01094, Pf10613	14804	ENSMUSG00000071424	Grid2	A4QPG1; mmu:14804; Q61625
13	P35436	Glutamate receptor ionotropic, NMDA 2A [OS=Mus musculus]	cell-cell signaling;cell organization and biogenesis;protein metabolism;other metabolic processes;stress response;transport;developmental processes;signal transduction;other biological processes	plasma membrane;other membranes;ER/Golgi;other cell component	signal transduction activity or receptor binding;transporter activity;other molecular function	Pf00060, Pf01094, Pf10565, Pf10613	14811	ENSMUSG00000059003	Grin2a	mmu:14811; P35436	Alzheimer's disease	Synaptic adhesion-like molecules; Assembly and cell surface presentation of NMDA receptors; Unblocking of NMDA receptors, glutamate binding and activation
14	Q9JIA1	Leucine-rich glioma-inactivated protein 1 [OS=Mus musculus]	cell organization and biogenesis;developmental processes;other biological processes	non-structural extracellular;ER/Golgi;other cell component	signal transduction activity or receptor binding	Pf03736, Pf13855	56839	ENSMUSG00000067242	Lgi1	A0A0G2JFT0; mmu:56839; Q9JIA1		LGI-ADAM interactions
15	Q6GQU6	Leucine-rich repeat and immunoglobulin-like domain-containing nogo receptor-interacting protein 3 [OS=Mus musculus]		non-structural extracellular;extracellular matrix;other membranes		Pf07679, Pf13855	237403	ENSMUSG00000051067	Lingo3	E9QK50; mmu:237403; Q6GQU6
16	P05532	Mast/stem cell growth factor receptor Kit [OS=Mus musculus]	cell adhesion;cell cycle OR cell proliferation;cell organization and biogenesis;protein metabolism;other metabolic processes;stress response;transport;developmental processes;signal transduction;other biological processes	non-structural extracellular;plasma membrane;other membranes;nucleus;other cell component	kinase activity;other molecular function	Pf00047, Pf07714	16590	ENSMUSG00000005672	Kit	mmu:16590; P05532; Q61415; Q61416; Q61417; Q6LEE9; Q6QJB7; Q6QJB8; Q7TS86; Q8C8K9	Focal adhesion: PI3K-Akt-mTOR signaling pathway; Kit receptor signaling pathway	RAF/MAP kinase cascade; PIP3 activates AKT signaling; PI5P, PP2A and IER3 Regulate PI3K/AKT Signaling; Regulation of KIT signaling
17	P97772	Metabotropic glutamate receptor 1 [OS=Mus musculus]	cell-cell signaling;transport;signal transduction;other biological processes	plasma membrane;other membranes;nucleus;other cell component	other molecular function	Pf00003, Pf01094, Pf07562, Pf10606	14816	ENSMUSG00000019828	Grm1	mmu:14816; P97772; Q6AXG4; Q9EPV6	GPCRs, non-odorant ; Serotonin and anxiety; GPCRs, class C metabotropic glutamate, pheromone; GPCRs, other	G alpha (q) signalling events; Neurexins and neuroligins; Class C/3 (Metabotropic glutamate/pheromone receptors)
18	Q68EF4	Metabotropic glutamate receptor 4 [OS=Mus musculus]	cell-cell signaling;signal transduction;other biological processes	plasma membrane;other membranes;other cell component	other molecular function	Pf00003, Pf01094, Pf07562	268934		Grm4	mmu:268934; Q68EF4; Q80UC2	GPCRs, class C metabotropic glutamate, pheromone	G alpha (i) signalling events; Class C/3 (Metabotropic glutamate/pheromone receptors)
19	P70232	Neural cell adhesion molecule L1-like protein [OS=Mus musculus]	cell adhesion;cell organization and biogenesis;stress response;developmental processes;other biological processes	non-structural extracellular;plasma membrane;other membranes;other cell component	other molecular function	Pf00041, Pf07679, Pf13882, Pf13927	12661	ENSMUSG00000030077	Chl1	A2RRK1; mmu:12661; P70232; Q8BS24; Q8C6W0; Q8C823; Q8VBY7	Splicing factor NOVA regulated synaptic proteins
20	Q9CS84	Neurexin-1 [OS=Mus musculus]	cell adhesion;cell-cell signaling;cell organization and biogenesis;transport;developmental processes;signal transduction;other biological processes	plasma membrane;other membranes;ER/Golgi;nucleus;other cell component	signal transduction activity or receptor binding;other molecular function	Pf00008, Pf02210	18189	ENSMUSG00000024109	Nrxn1	G3UWZ9; O88722; Q80Y87; Q8CHE6; Q9CS84		Neurexins and neuroligins
21	Q8CJH3	Plexin-B1 [OS=Mus musculus]	cell organization and biogenesis;developmental processes;signal transduction;other biological processes	plasma membrane;other membranes;other cell component	other molecular function	Pf01403, Pf01437, Pf01833, Pf08337, Pf17960, Pf18020, Pf20170	235611	ENSMUSG00000053646	Plxnb1	E9QKS4; mmu:235611; Q6ZQC3; Q80ZZ1; Q8CJH3		G alpha (12/13) signalling events; RHOD GTPase cycle; Sema4D mediated inhibition of cell attachment and migration; Sema4D induced cell migration and growth-cone collapse
22	Q8C419	Probable G-protein coupled receptor 158 [OS=Mus musculus]	signal transduction;other biological processes	plasma membrane;other membranes	other molecular function	Pf00003	241263	ENSMUSG00000045967	Gpr158	B1AWY4; mmu:241263; Q8C419; Q8CHB0	GPCRs, odorant
23	Q91ZX7	Prolow-density lipoprotein receptor-related protein 1 [OS=Mus musculus]	cell cycle OR cell proliferation;cell organization and biogenesis;other metabolic processes;stress response;transport;developmental processes;signal transduction;other biological processes	plasma membrane;other membranes;cytoskeleton;ER/Golgi;nucleus;other cytoplasmic organelle;other cell component	signal transduction activity or receptor binding;other molecular function	Pf00008, Pf00057, Pf00058, Pf07645, Pf12662, Pf14670, Pf16472	16971		Lrp1	mmu:16971; Q61291; Q91ZX7; Q920Y4	Statin pathway; Wnt signaling pathway	Scavenging of heme from plasma; Retinoid metabolism and transport
24	Q5F226	Protocadherin Fat 2 [OS=Mus musculus]	cell adhesion;other biological processes	plasma membrane;other membranes;ER/Golgi;other cell component	other molecular function	Pf00008, Pf00028, Pf02210	245827	ENSMUSG00000055333	Fat2	mmu:245827; Q3V1D4; Q5F226; Q69ZY7
25	Q60841	Reelin [OS=Mus musculus]	cell adhesion;cell organization and biogenesis;protein metabolism;other metabolic processes;stress response;developmental processes;signal transduction;other biological processes	non-structural extracellular;extracellular matrix;plasma membrane;other membranes;other cell component	signal transduction activity or receptor binding;other molecular function	Pf02014, Pf18720	19699	ENSMUSG00000042453	Reln	E9PZ78; mmu:19699; Q60841; Q9CUA6	Focal adhesion: PI3K-Akt-mTOR signaling pathway; Focal adhesion	Reelin signalling pathway
26	Q56A07	Sodium channel subunit beta-2 [OS=Mus musculus]	other metabolic processes;stress response;transport;developmental processes;other biological processes	plasma membrane;other membranes	transporter activity;other molecular function	Pf07686	72821	ENSMUSG00000070304	Scn2b	mmu:72821; Q56A07
27	Q6PHS9	Voltage-dependent calcium channel subunit alpha-2/delta-2 [OS=Mus musculus]	cell organization and biogenesis;transport;other biological processes	plasma membrane;other membranes	transporter activity;other molecular function	Pf00092, Pf08399, Pf08473	56808	ENSMUSG00000010066	Cacna2d2	B2RY16; mmu:56808; Q3TPT9; Q3TSS6; Q6PHS9; Q6REE3; Q8C8R8; Q8CHE9; Q920H5; Q920H6; Q9EQG2; Q9R142		Regulation of insulin secretion; Presynaptic depolarization and calcium channel opening; Phase 0 - rapid depolarisation; Phase 2 - plateau phase
