# Supplementary material for: Tyrosinase-based proximity labeling in living cells and in vivo
Source: Research Square preprint supplement (doi:10.21203/rs.3.rs-3354015/v1), 2023-09-20
Supplement: Supplementary file 4 [file d240548bde30bd481f5129f6.xlsx]

## Sheet: Nu-BmTyr
No.	Protein FDR Confidence: Combined	Master	Accession	Description	Exp. q-value: Combined	Sum PEP Score	Coverage [%]	# Peptides	# PSMs	# Unique Peptides	# Protein Groups	# AAs	MW [kDa]	calc. pI	Score Sequest HT: Sequest HT	# Peptides (by Search Engine): Sequest HT	# Razor Peptides	Abundance Ratio Adj. P-Value: (Nu-BmTyr) / (untransfection)	Abundance Ratio: (Nu-BmTyr) / (untransfection)
1	High	Master Protein	O75694	nuclear pore complex protein nup155 [OS=Homo sapiens]	0	130.07	26	27	78	27	1	1391	155.1	6.16	182.62	27	0	0.000495982	1000
2	High	Master Protein	P18583-9	Isoform I of Protein SON [OS=Homo sapiens]	0	131.828	19	34	86	34	1	2466	267.9	5.57	157.79	34	0	0.000950614	1000
3	High	Master Protein	P49756-1	RNA-binding protein 25 [OS=Homo sapiens]	0	96.794	29	24	71	24	1	843	100.1	6.32	115.52	24	0	0.0321792	1000
4	High	Master Protein	Q15424-3	Isoform 3 of Scaffold attachment factor B1 [OS=Homo sapiens]	0	198.11	36	43	116	28	1	917	102.8	5.49	242.3	43	0	0.00164831	1000
5	High	Master Protein	Q8IZL8	Proline-, glutamic acid- and leucine-rich protein 1 [OS=Homo sapiens]	0	60.17	18	14	32	14	1	1130	119.6	4.34	67.41	14	0	0.000648166	1000
6	High	Master Protein	Q96T88-2	Isoform 2 of E3 ubiquitin-protein ligase UHRF1 [OS=Homo sapiens]	0	62.56	25	14	35	14	1	806	91.1	7.44	71.82	14	0	0.00211494	1000
7	High	Master Protein	Q9H0A0	RNA cytidine acetyltransferase [OS=Homo sapiens]	0	66.329	23	19	42	18	1	1025	115.7	8.27	62.29	19	1	0.0172486	1000
8	High	Master Protein	Q9H307	Pinin [OS=Homo sapiens]	0	114.896	30	24	80	24	1	717	81.6	7.14	151.05	24	0	0.00761543	1000
9	High	Master Protein	Q9NYF8-1	Bcl-2-associated transcription factor 1 [OS=Homo sapiens]	0	106.709	25	21	73	20	1	920	106.1	9.98	129.71	21	1	0.000495982	1000
10	High	Master Protein	Q9ULW0	Targeting protein for Xklp2 [OS=Homo sapiens]	0	130.039	45	29	69	29	1	747	85.6	9.23	165.4	29	0	0.00222259	1000
11	High	Master Protein	P35659-1	Protein DEK [OS=Homo sapiens]	0	80.82	35	16	61	16	1	375	42.6	8.56	129.58	16	0	0.0034627	976.654
12	High	Master Protein	Q9UQ35	serine/arginine repetitive matrix protein 2 [OS=Homo sapiens]	0	312.418	24	49	205	49	1	2752	299.4	12.06	466.66	49	0	0.00136765	880.472
13	High	Master Protein	Q9BTC0	Death-inducer obliterator 1 [OS=Homo sapiens]	0	111.286	22	31	65	31	1	2240	243.7	7.88	102.58	31	0	0.000495982	832.054
14	High	Master Protein	Q16630-2	Isoform 2 of Cleavage and polyadenylation specificity factor subunit 6 [OS=Homo sapiens]	0	56.151	23	10	31	10	1	588	63.4	7.71	75.17	10	0	0.000742791	771.016
15	High	Master Protein	Q8IX01-1	SURP and G-patch domain-containing protein 2 [OS=Homo sapiens]	0	125.479	36	32	69	32	1	1082	120.1	7.28	106.36	32	0	0.000495982	742.63
16	High	Master Protein	Q92797-1	Symplekin [OS=Homo sapiens]	0	112.956	27	24	55	24	1	1274	141.1	6.13	120.63	24	0	0.000971631	725.939
17	High	Master Protein	O15226-2	Isoform 2 of NF-kappa-B-repressing factor [OS=Homo sapiens]	0	47.002	23	13	32	13	1	705	79.4	8.88	57.36	13	0	0.00146096	724.482
18	High	Master Protein	Q96AE4-2	Isoform 2 of Far upstream element-binding protein 1 [OS=Homo sapiens]	0	39.471	25	14	24	9	1	653	68.6	7.31	38.59	14	2	0.000855168	724.219
19	High	Master Protein	P62136-1	serine/threonine-protein phosphatase PP1-alpha catalytic subunit [OS=Homo sapiens]	0	51.38	43	10	27	3	1	330	37.5	6.33	61.57	10	8	0.00821104	709.192
20	High	Master Protein	Q96T58	Msx2-interacting protein [OS=Homo sapiens]	0	120.074	15	35	66	35	1	3664	402	7.64	119.62	35	0	0.000495982	599.588
21	High	Master Protein	P52292	Importin subunit alpha-1 [OS=Homo sapiens]	0	85.057	34	15	60	15	1	529	57.8	5.4	148.22	15	0	0.00447738	592.444
22	High	Master Protein	O95785-3	Isoform 3 of Protein Wiz [OS=Homo sapiens]	0	47.472	18	12	25	12	1	965	102.9	9.52	44.89	12	0	0.00678238	572.964
23	High	Master Protein	Q7LBC6-1	Lysine-specific demethylase 3B [OS=Homo sapiens]	0	35.369	9	12	22	12	1	1761	191.5	7.18	21.82	12	0	0.00226045	571.554
24	High	Master Protein	Q8WUM0	Nuclear pore complex protein Nup133 [OS=Homo sapiens]	0	58.521	18	15	30	15	1	1156	128.9	5.1	65.86	15	0	0.00282888	555.621
25	High	Master Protein	O95232-1	Luc7-like protein 3 [OS=Homo sapiens]	0	35.506	19	7	19	7	1	432	51.4	9.79	38	7	0	0.00127256	544.038
26	High	Master Protein	Q4G0J3-3	Isoform 3 of La-related protein 7 [OS=Homo sapiens]	0	30.627	18	8	21	8	1	589	67.6	9.54	21.41	8	0	0.00120201	543.455
27	High	Master Protein	P49750-4	Isoform 4 of YLP motif-containing protein 1 [OS=Homo sapiens]	0	51.475	10	14	30	14	1	2146	241.5	6.55	50.31	14	0	0.000495982	538.846
28	High	Master Protein	Q9BZE4	Nucleolar GTP-binding protein 1 [OS=Homo sapiens]	0	64.235	31	18	37	18	1	634	73.9	9.5	70.2	18	0	0.00102656	518.588
29	High	Master Protein	Q14684	Ribosomal RNA processing protein 1 homolog B [OS=Homo sapiens]	0	153.986	47	31	90	31	1	758	84.4	9.76	204.39	31	0	0.000495982	512.258
30	High	Master Protein	Q9NRZ9	Lymphoid-specific helicase [OS=Homo sapiens]	0	42.368	17	13	28	13	1	838	97	7.93	41.15	13	0	0.00155111	511.683
31	High	Master Protein	O15355	Protein phosphatase 1G [OS=Homo sapiens]	0	29.484	21	8	19	8	1	546	59.2	4.36	41.48	8	0	0.000789162	511.389
32	High	Master Protein	Q13427	peptidyl-prolyl cis-trans isomerase g [OS=Homo sapiens]	0	24.619	12	8	16	8	1	754	88.6	10.29	27.65	8	0	0.000495982	500.355
33	High	Master Protein	P26358-1	DNA (cytosine-5)-methyltransferase 1 [OS=Homo sapiens]	0	125.675	24	32	72	32	1	1616	183.1	7.75	119.26	32	0	0.0134656	494.631
34	High	Master Protein	P55072	Transitional endoplasmic reticulum ATPase [OS=Homo sapiens]	0	111.136	39	27	67	27	1	806	89.3	5.26	148.37	27	0	0.00335328	486.038
35	High	Master Protein	Q9H6R4-1	Nucleolar protein 6 [OS=Homo sapiens]	0	51.411	20	15	29	15	1	1146	127.5	7.64	45.23	15	0	0.00269025	478.012
36	High	Master Protein	P49792	E3 SUMO-protein ligase RanBP2 [OS=Homo sapiens]	0	170.538	20	45	92	45	1	3224	358	6.2	112.8	45	0	0.0030368	448.283
37	High	Master Protein	Q13428-3	Isoform 3 of Treacle protein [OS=Homo sapiens]	0	108.966	20	24	66	3	1	1489	152.1	9.04	140.95	24	22	0.00160091	438.033
38	High	Master Protein	Q16891	MICOS complex subunit Mic60 [OS=Homo sapiens]	0	107.575	41	24	55	24	1	758	83.6	6.48	109.9	24	0	0.00135715	426.44
39	High	Master Protein	Q9UKX7	Nuclear pore complex protein Nup50 [OS=Homo sapiens]	0	54.515	37	13	29	13	1	468	50.1	7.06	73.72	13	0	0.00146096	420.581
40	High	Master Protein	Q96KR1	Zinc finger RNA-binding protein [OS=Homo sapiens]	0	174.589	40	33	97	33	1	1074	116.9	9.04	213.25	33	0	0.016018	420.551
41	High	Master Protein	Q07955-1	Serine/arginine-rich splicing factor 1 [OS=Homo sapiens]	0	41.442	46	11	36	11	1	248	27.7	10.36	61.36	11	0	0.00759781	408.422
42	High	Master Protein	P42166	Zinc finger RNA-binding protein [OS=Homo sapiens]	0	160.108	62	31	101	21	1	694	75.4	7.66	233.23	31	10	0.00108125	402.063
43	High	Master Protein	O75691	Small subunit processome component 20 homolog [OS=Homo sapiens]	0	97.564	13	34	58	34	1	2785	318.2	7.39	76.84	34	0	0.00161385	401.472
44	High	Master Protein	Q68CP9-1	AT-rich interactive domain-containing protein 2 [OS=Homo sapiens]	0	79.99	17	19	40	19	1	1835	197.3	7.42	83.97	19	0	0.000861364	401.176
45	High	Master Protein	O75475-1	PC4 and SFRS1-interacting protein [OS=Homo sapiens]	0	117.188	42	22	77	22	1	530	60.1	9.13	141.23	22	0	0.000972613	362.851
46	High	Master Protein	O00567	Nucleolar protein 56 [OS=Homo sapiens]	0	180.299	65	30	124	30	1	594	66	9.19	224.88	30	0	0.00444896	357.285
47	High	Master Protein	O75367-1	Core histone macro-H2A.1 [OS=Homo sapiens]	0	35.189	28	8	19	6	1	372	39.6	9.79	47.32	8	2	0.00401651	356.091
48	High	Master Protein	O43159	ribosomal rna-processing protein 8 [OS=Homo sapiens]	0	42.493	28	11	25	11	1	456	50.7	9.42	37.32	11	0	0.000980371	354.566
49	High	Master Protein	O15042	U2 snRNP-associated SURP motif-containing protein [OS=Homo sapiens]	0	122.67	31	30	78	30	1	1029	118.2	8.47	154.57	30	0	0.000495982	351.776
50	High	Master Protein	Q96JM3	Chromosome alignment-maintaining phosphoprotein 1 [OS=Homo sapiens]	0	60.547	28	17	33	17	1	812	89	8.44	70.04	17	0	0.000950845	341.645
51	High	Master Protein	Q07666	KH domain-containing, RNA-binding, signal transduction-associated protein 1 [OS=Homo sapiens]	0	45.601	29	11	31	11	1	443	48.2	8.66	58.68	11	0	0.00367087	340.985
52	High	Master Protein	Q12789-2	General transcription factor 3C polypeptide 1 [OS=Homo sapiens]	0	131.069	25	38	63	38	1	2109	238.7	7.3	105.93	38	0	0.00129379	338.76
53	High	Master Protein	P42167	Lamina-associated polypeptide 2, isoforms beta/gamma [OS=Homo sapiens]	0	99.844	53	18	65	8	1	454	50.6	9.38	170.6	18	0	0.00742144	332.818
54	High	Master Protein	O60264	SWI/SNF-related matrix-associated actin-dependent regulator of chromatin subfamily A member 5 [OS=Homo sapiens]	0	164.089	42	41	110	29	1	1052	121.8	8.09	204.61	41	14	0.00484829	331.133
55	High	Master Protein	P37802-2	Isoform 2 of Transgelin-2 [OS=Homo sapiens]	0	20.988	28	5	14	5	1	220	24.4	8.25	20.36	5	0	0.000654536	326.837
56	High	Master Protein	Q9NVP1	ATP-dependent RNA helicase DDX18 [OS=Homo sapiens]	0	55.955	29	14	28	14	1	670	75.4	9.5	46.9	14	0	0.0361091	326.673
57	High	Master Protein	P31930	Cytochrome b-c1 complex subunit 1, mitochondrial [OS=Homo sapiens]	0	39.041	32	10	22	9	1	480	52.6	6.37	37.9	10	1	0.00219172	323.866
58	High	Master Protein	P19784	casein kinase II subunit alpha' [OS=Homo sapiens]	0	45.174	36	10	21	10	1	350	41.2	8.56	42.6	10	0	0.0502505	321.891
59	High	Master Protein	P12270	Nucleoprotein TPR [OS=Homo sapiens]	0	110.837	15	29	60	29	1	2363	267.1	5.02	121.8	29	0	0.00404259	318.822
60	High	Master Protein	Q9BSJ8-2	Isoform 2 of Extended synaptotagmin-1 [OS=Homo sapiens]	0	33.899	11	9	19	9	1	1114	123.9	5.78	44.32	9	0	0.000654536	310.805
61	High	Master Protein	Q68E01	Integrator complex subunit 3 [OS=Homo sapiens]	0	38	13	10	18	10	1	1043	118	5.8	27.57	10	0	0.00305835	307.409
62	High	Master Protein	P33993-1	DNA replication licensing factor MCM7 [OS=Homo sapiens]	0	54.999	29	15	32	15	1	719	81.3	6.46	58.17	15	0	0.00164311	306.886
63	High	Master Protein	Q14690	Protein RRP5 homolog [OS=Homo sapiens]	0	234.541	36	56	132	56	1	1871	208.6	8.87	277.7	56	0	0.00887389	298.949
64	High	Master Protein	O00299	chloride intracellular channel protein 1 [OS=Homo sapiens]	0	23.311	31	5	11	5	1	241	26.9	5.17	12.63	5	0	0.000495982	286.053
65	High	Master Protein	P54136-1	arginine--tRNA ligase, cytoplasmic [OS=Homo sapiens]	0	54.313	25	15	33	15	1	660	75.3	6.68	51.21	15	0	0.00177434	284.278
66	High	Master Protein	Q9H583	HEAT repeat-containing protein 1 [OS=Homo sapiens]	0	92.474	15	27	56	27	1	2144	242.2	6.54	69.33	27	0	0.00078038	283.275
67	High	Master Protein	P11388-4	Isoform 4 of DNA topoisomerase 2-alpha [OS=Homo sapiens]	0	175.995	30	44	103	32	1	1612	182.6	8.63	187.59	44	13	0.0112414	283.119
68	High	Master Protein	Q92945	Far upstream element-binding protein 2 [OS=Homo sapiens]	0	172.289	47	29	113	26	1	711	73.1	7.3	256.05	29	3	0.000648166	282.243
69	High	Master Protein	Q9Y3A4	Ribosomal RNA-processing protein 7 homolog A [OS=Homo sapiens]	0	27.775	29	5	12	5	1	280	32.3	9.58	38.31	5	0	0.000495982	280.024
70	High	Master Protein	Q14839-2	Isoform 2 of Chromodomain-helicase-DNA-binding protein 4 [OS=Homo sapiens]	0	203.095	31	50	124	33	1	1940	220.7	5.97	213.65	50	19	0.0235737	277.748
71	High	Master Protein	Q14980-2	Isoform 2 of Nuclear mitotic apparatus protein 1 [OS=Homo sapiens]	0	460.846	53	97	253	97	1	2101	236.4	5.8	598.3	97	0	0.000495982	276.395
72	High	Master Protein	Q8TDN6	Ribosome biogenesis protein BRX1 homolog [OS=Homo sapiens]	0	34.364	32	9	16	9	1	353	41.4	9.92	22.26	9	0	0.00194436	275.656
73	High	Master Protein	Q8N3U4-2	Isoform 2 of Cohesin subunit SA-2 [OS=Homo sapiens]	0	74.035	22	22	42	22	1	1268	145.7	5.52	53.2	22	0	0.00102656	270.301
74	High	Master Protein	Q9Y2X3	Nucleolar protein 58 [OS=Homo sapiens]	0	202.554	58	28	121	28	1	529	59.5	8.92	303.4	28	0	0.000572518	268.882
75	High	Master Protein	Q8N1F7-1	Nuclear pore complex protein Nup93 [OS=Homo sapiens]	0	85.911	30	23	50	23	1	819	93.4	5.72	98.14	23	0	0.000495982	267.815
76	High	Master Protein	Q06587	E3 ubiquitin-protein ligase RING1 [OS=Homo sapiens]	0	29.623	28	7	14	5	1	406	42.4	5.62	28.37	7	2	0.00309621	259.864
77	High	Master Protein	Q9BVP2	Guanine nucleotide-binding protein-like 3 [OS=Homo sapiens]	0	83.379	34	18	50	18	1	549	62	9.16	86.93	18	0	0.000654536	259.351
78	High	Master Protein	O00541-1	Pescadillo homolog [OS=Homo sapiens]	0	45.823	27	13	30	13	1	588	68	7.33	51.8	13	0	0.00635909	252.228
79	High	Master Protein	P49321-3	Isoform 3 of Nuclear autoantigenic sperm protein [OS=Homo sapiens]	0	81.524	39	20	40	20	1	790	86.2	4.35	81.27	20	0	0.00131593	242.303
80	High	Master Protein	Q92769	Histone deacetylase 2 [OS=Homo sapiens]	0	47.762	29	11	32	6	1	488	55.3	5.91	63.14	11	5	0.000495982	239.108
81	High	Master Protein	Q13435	Splicing factor 3b subunit 2 [OS=Homo sapiens]	0	29.704	15	9	19	9	1	895	100.2	5.67	30.19	9	0	0.0235293	233.429
82	High	Master Protein	Q1ED39	Lysine-rich nucleolar protein 1 [OS=Homo sapiens]	0	36.559	27	9	20	9	1	458	51.6	9.86	30.89	9	0	0.000495982	233.018
83	High	Master Protein	Q29RF7-1	Sister chromatid cohesion protein PDS5 homolog A [OS=Homo sapiens]	0	124.371	28	29	68	26	1	1337	150.7	7.91	130.84	29	3	0.000505184	230.966
84	High	Master Protein	Q9BQG0-2	Isoform 2 of Myb-binding protein 1A [OS=Homo sapiens]	0	153.535	37	41	91	41	1	1332	149.3	9.28	154.34	41	0	0.00163048	227.195
85	High	Master Protein	Q96PK6-1	RNA-binding protein 14 [OS=Homo sapiens]	0	58.905	26	14	34	14	1	669	69.4	9.67	72	14	0	0.0139663	225.539
86	High	Master Protein	Q14683	structural maintenance of chromosomes protein 1a [OS=Homo sapiens]	0	238.025	53	58	139	58	1	1233	143.1	7.64	264.91	58	0	0.000670069	222.944
87	High	Master Protein	P49916-1	DNA ligase 3 [OS=Homo sapiens]	0	63.78	23	18	36	18	1	1009	112.8	9.01	50.03	18	0	0.00146096	222.386
88	High	Master Protein	O76003	glutaredoxin-3 [OS=Homo sapiens]	0	15.128	19	5	6	5	1	335	37.4	5.39	7.37	5	0	0.0216506	218.928
89	High	Master Protein	Q9Y4P3	Transducin beta-like protein 2 [OS=Homo sapiens]	0	26.855	23	6	8	6	1	447	49.8	9.44	21.16	6	0	0.00139724	216.575
90	High	Master Protein	O75643-1	U5 small nuclear ribonucleoprotein 200 kDa helicase [OS=Homo sapiens]	0	378.211	35	67	207	67	1	2136	244.4	6.06	490.61	67	0	0.000505801	213.801
91	High	Master Protein	Q8NI27-1	THO complex subunit 2 [OS=Homo sapiens]	0	89.33	17	24	51	24	1	1593	182.7	8.44	69.47	24	0	0.00107756	212.483
92	High	Master Protein	Q2TAY7	WD40 repeat-containing protein SMU1 [OS=Homo sapiens]	0	37.501	27	10	23	10	1	513	57.5	7.18	47.58	10	0	0.00234674	211.557
93	High	Master Protein	Q92794	histone acetyltransferase KAT6A [OS=Homo sapiens]	0	30.468	7	11	16	11	1	2004	224.9	5.68	15.13	11	0	0.00101129	206.101
94	High	Master Protein	Q12905	Interleukin enhancer-binding factor 2 [OS=Homo sapiens]	0	74.68	47	14	48	14	1	390	43	5.26	115.53	14	0	0.000722127	204.767
95	High	Master Protein	P04899-4	Isoform sGi2 of Guanine nucleotide-binding protein G(i) subunit alpha-2 [OS=Homo sapiens]	0	26.66	34	9	14	4	1	366	41.5	5.99	15.5	9	5	0.00233735	204.586
96	High	Master Protein	O43719	HIV Tat-specific factor 1 [OS=Homo sapiens]	0	37.967	17	12	22	12	1	755	85.8	4.4	21.92	12	0	0.00933463	203.19
97	High	Master Protein	Q9NW13-1	RNA-binding protein 28 [OS=Homo sapiens]	0	70.215	26	18	44	18	1	759	85.7	9.22	98.04	18	0	0.000908475	202.405
98	High	Master Protein	Q9UKV3-1	Apoptotic chromatin condensation inducer in the nucleus [OS=Homo sapiens]	0	202.889	38	42	120	2	1	1341	151.8	6.43	237.14	42	42	0.00241377	201.631
99	High	Master Protein	O00148	ATP-dependent RNA helicase DDX39A [OS=Homo sapiens]	0	55.872	42	14	42	6	1	427	49.1	5.68	66.42	14	0	0.000959077	201.416
100	High	Master Protein	Q92922	SWI/SNF complex subunit SMARCC1 [OS=Homo sapiens]	0	85.881	26	23	48	16	1	1105	122.8	5.76	73.88	23	7	0.00533334	200.231
101	High	Master Protein	Q9Y2L1-1	exosome complex exonuclease RRP44 [OS=Homo sapiens]	0	117.64	37	25	57	25	1	958	108.9	7.14	122.01	25	0	0.00477584	199.816
102	High	Master Protein	P28331-2	Isoform 2 of NADH-ubiquinone oxidoreductase 75 kDa subunit, mitochondrial [OS=Homo sapiens]	0	35.94	22	10	18	10	1	741	80.9	6.64	30.03	10	0	0.00233735	199.38
103	High	Master Protein	P43243	Matrin-3 [OS=Homo sapiens]	0	172.2	44	35	133	35	1	847	94.6	6.25	246.84	35	0	0.00063247	199.297
104	High	Master Protein	O00410-3	Isoform 3 of Importin-5 [OS=Homo sapiens]	0	68.558	24	18	39	18	1	1115	125.5	4.92	59.56	18	0	0.0169567	193.21
105	High	Master Protein	Q15717-2	Isoform 2 of ELAV-like protein 1 [OS=Homo sapiens]	0	84.397	35	13	52	13	1	353	39	9.45	119.35	13	0	0.00252086	192.016
106	High	Master Protein	Q16576-1	Histone-binding protein RBBP7 [OS=Homo sapiens]	0	27.136	22	7	17	5	1	425	47.8	5.05	38.17	7	2	0.000495982	190.267
107	High	Master Protein	Q9UIG0	Tyrosine-protein kinase BAZ1B [OS=Homo sapiens]	0	174.34	36	46	108	45	1	1483	170.8	8.48	202.35	46	1	0.000503454	189.415
108	High	Master Protein	A6NHR9-1	structural maintenance of chromosomes flexible hinge domain-containing protein 1 [OS=Homo sapiens]	0	124.129	22	34	71	34	1	2005	226.2	7.3	128.74	34	0	0.000495982	188.808
109	High	Master Protein	O75369-8	Isoform 8 of Filamin-B [OS=Homo sapiens]	0	134.824	21	37	77	35	1	2633	281.5	5.71	146.4	37	0	0.000648166	188.218
110	High	Master Protein	Q15392	Delta(24)-sterol reductase [OS=Homo sapiens]	0	7.697	5	4	4	4	1	516	60.1	8.16	6.6	4	0	0.00120201	187.673
111	High	Master Protein	P12532	Creatine kinase U-type, mitochondrial [OS=Homo sapiens]	0	46.19	30	11	17	11	1	417	47	8.34	32.43	11	0	0.000722127	187.307
112	High	Master Protein	O43823	A-kinase anchor protein 8 [OS=Homo sapiens]	0	30.16	14	9	19	9	1	692	76.1	5.15	30.96	9	0	0.00550553	186.478
113	High	Master Protein	Q13242	serine/arginine-rich splicing factor 9 [OS=Homo sapiens]	0	28.115	39	9	23	9	1	221	25.5	8.65	40.77	9	0	0.000959077	186.381
114	High	Master Protein	P61978-3	Isoform 3 of Heterogeneous nuclear ribonucleoprotein K [OS=Homo sapiens]	0	160.616	53	24	122	24	1	440	48.5	5.54	283.23	24	0	0.000750316	184.54
115	High	Master Protein	P05388	60S acidic ribosomal protein P0 [OS=Homo sapiens]	0	64.231	46	10	43	10	1	317	34.3	5.97	109.98	10	0	0.00146096	183.798
116	High	Master Protein	Q9Y2W1	Thyroid hormone receptor-associated protein 3 [OS=Homo sapiens]	0	54.827	21	15	30	14	1	955	108.6	10.15	63.79	15	0	0.000495982	183.286
117	High	Master Protein	P49790	Nuclear pore complex protein Nup153 [OS=Homo sapiens]	0	191.898	47	47	111	47	1	1475	153.8	8.73	215.34	47	0	0.00350507	182.92
118	High	Master Protein	P52272	Heterogeneous nuclear ribonucleoprotein M [OS=Homo sapiens]	0	204.281	54	40	140	40	1	730	77.5	8.7	250.9	40	0	0.000495982	182.873
119	High	Master Protein	P29966	Myristoylated alanine-rich C-kinase substrate [OS=Homo sapiens]	0	14.882	23	4	8	4	1	332	31.5	4.45	16.1	4	0	0.00298363	182.28
120	High	Master Protein	Q9GZR2-1	RNA exonuclease 4 [OS=Homo sapiens]	0	29.866	24	8	15	8	1	422	46.6	9.77	35.21	8	0	0.0180722	181.469
121	High	Master Protein	P51991-1	Heterogeneous nuclear ribonucleoprotein A3 [OS=Homo sapiens]	0	113.702	50	23	65	21	1	378	39.6	9.01	141.25	23	2	0.00395177	180.872
122	High	Master Protein	Q14966-1	Zinc finger protein 638 [OS=Homo sapiens]	0	155.629	28	35	91	35	1	1978	220.5	6.38	185.15	35	0	0.000967502	180.043
123	High	Master Protein	Q9Y265	RuvB-like 1 [OS=Homo sapiens]	0	56.161	34	12	33	12	1	456	50.2	6.42	77.3	12	0	0.000495982	179.238
124	High	Master Protein	P06899	Histone H2B type 1-J [OS=Homo sapiens]	0	46.018	41	6	57	2	1	126	13.9	10.32	111.37	6	0	0.00146096	177.76
125	High	Master Protein	O95239-1	Chromosome-associated kinesin KIF4A [OS=Homo sapiens]	0	48.131	15	15	21	15	1	1232	139.8	6.27	42.26	15	0	0.00298363	177.746
126	High	Master Protein	O94776	Metastasis-associated protein MTA2 [OS=Homo sapiens]	0	89.041	30	18	51	16	1	668	75	9.66	120.6	18	3	0.00896191	177.466
127	High	Master Protein	P26599-3	Isoform 3 of Polypyrimidine tract-binding protein 1 [OS=Homo sapiens]	0	161.49	49	20	136	20	1	557	59.6	9.16	280.24	20	0	0.000837626	176.187
128	High	Master Protein	Q9GZL7	ribosome biogenesis protein WDR12 [OS=Homo sapiens]	0	23.559	24	8	15	8	1	423	47.7	5.9	15.42	8	0	0.00137198	174.887
129	High	Master Protein	P52789	Hexokinase-2 [OS=Homo sapiens]	0	78.955	29	24	44	21	1	917	102.3	6.05	67.45	24	3	0.00131593	174.814
130	High	Master Protein	O94906-1	Pre-mRNA-processing factor 6 [OS=Homo sapiens]	0	67.614	25	20	30	20	1	941	106.9	8.25	46.78	20	0	0.0502493	173.814
131	High	Master Protein	P55265-4	Isoform 4 of Double-stranded RNA-specific adenosine deaminase [OS=Homo sapiens]	0	204.206	34	39	126	3	1	1269	140.7	8.56	254.71	39	39	0.000654536	173.651
132	High	Master Protein	Q96MU7-1	YTH domain-containing protein 1 [OS=Homo sapiens]	0	21.004	11	6	9	6	1	727	84.6	6.23	12.81	6	0	0.00153595	173.061
133	High	Master Protein	Q9UJV9	Probable ATP-dependent RNA helicase DDX41 [OS=Homo sapiens]	0	17.761	13	6	8	6	1	622	69.8	6.84	8.47	6	0	0.0206894	171.819
134	High	Master Protein	Q8WVC0-1	RNA polymerase-associated protein LEO1 [OS=Homo sapiens]	0	13.146	10	4	6	4	1	666	75.4	4.51	9.72	4	0	0.000495982	169.51
135	High	Master Protein	Q99575	Ribonucleases P/MRP protein subunit pop1 [OS=Homo sapiens]	0	53.462	20	13	22	13	1	1024	114.6	9.22	47.1	13	0	0.000495982	168.732
136	High	Master Protein	Q7Z3K3-1	Pogo transposable element with ZNF domain [OS=Homo sapiens]	0	56.261	13	15	31	15	1	1410	155.2	7.4	31.31	15	0	0.00644063	167.934
137	High	Master Protein	P35251-1	Replication factor C subunit 1 [OS=Homo sapiens]	0	63.183	21	18	39	18	1	1148	128.2	9.36	60.89	18	0	0.00155272	167.898
138	High	Master Protein	Q9BXP5	serrate RNA effector molecule homolog [OS=Homo sapiens]	0	59.042	22	18	40	18	1	876	100.6	5.96	55.23	18	0	0.000950845	165.15
139	High	Master Protein	O60841	Eukaryotic translation initiation factor 5B [OS=Homo sapiens]	0	50.081	16	12	30	12	1	1220	138.7	5.49	43.51	12	0	0.00818581	163.661
140	High	Master Protein	O00267	Transcription elongation factor Spt5 [OS=Homo sapiens]	0	28.913	11	7	15	7	1	1087	120.9	5.06	42.06	7	0	0.00177663	163.015
141	High	Master Protein	O00116	Alkyldihydroxyacetonephosphate synthase, peroxisomal [OS=Homo sapiens]	0	18.149	12	6	11	6	1	658	72.9	7.34	6.62	6	0	0.00115429	162.872
142	High	Master Protein	Q13185	chromobox protein homolog 3 [OS=Homo sapiens]	0	33.031	33	5	19	4	1	183	20.8	5.33	32.42	5	1	0.00362778	161.454
143	High	Master Protein	O60287	nucleolar pre-ribosomal-associated protein 1 [OS=Homo sapiens]	0	40.32	8	14	20	14	1	2271	254.2	6.47	21.19	14	0	0.00129379	161.06
144	High	Master Protein	O14980	Exportin-1 [OS=Homo sapiens]	0	57.583	20	17	32	17	1	1071	123.3	6.06	50.51	17	0	0.00273303	161.008
145	High	Master Protein	P00387-3	Isoform 3 of NADH-cytochrome b5 reductase 3 [OS=Homo sapiens]	0	19.219	24	5	10	5	1	334	38.2	6.9	22.05	5	0	0.0042276	160.36
146	High	Master Protein	Q9NTJ5	Phosphatidylinositide phosphatase SAC1 [OS=Homo sapiens]	0	11.448	6	4	8	4	1	587	66.9	7.12	6.66	4	0	0.000704821	159.908
147	High	Master Protein	O15269	serine palmitoyltransferase 1 [OS=Homo sapiens]	0	28.682	20	6	9	6	1	473	52.7	6.01	20.74	6	0	0.0283696	159.689
148	High	Master Protein	Q92499	ATP-dependent RNA helicase DDX1 [OS=Homo sapiens]	0	46.733	21	13	20	13	1	740	82.4	7.23	39.47	13	0	0.00305835	157.958
149	High	Master Protein	Q9UGP8	Translocation protein SEC63 homolog [OS=Homo sapiens]	0	36.157	16	10	23	10	1	760	87.9	5.31	33.52	10	0	0.00153595	156.834
150	High	Master Protein	P51610-4	Isoform 4 of Host cell factor 1 [OS=Homo sapiens]	0	74.911	13	20	46	20	1	2079	213.3	7.33	81.88	20	0	0.00219847	155.67
151	High	Master Protein	P23528	Cofilin-1 [OS=Homo sapiens]	0	29.309	52	8	16	8	1	166	18.5	8.09	17.4	8	0	0.0058166	155.18
152	High	Master Protein	Q7KZF4	staphylococcal nuclease domain-containing protein 1 [OS=Homo sapiens]	0	70.708	32	19	34	19	1	910	101.9	7.17	57.51	19	0	0.0017166	154.104
153	High	Master Protein	Q96ME7	Zinc finger protein 512 [OS=Homo sapiens]	0	46.474	33	12	25	12	1	567	64.6	9.76	39.09	12	0	0.000495982	153.025
154	High	Master Protein	P78347	General transcription factor II-I [OS=Homo sapiens]	0	116.937	32	27	62	27	1	998	112.3	6.39	132.14	27	0	0.00686846	150.79
155	High	Master Protein	O75494-1	Serine/arginine-rich splicing factor 10 [OS=Homo sapiens]	0	15.225	16	3	7	3	1	262	31.3	11.27	9.97	3	0	0.0385722	150.324
156	High	Master Protein	Q96EV2	RNA-binding protein 33 [OS=Homo sapiens]	0	17.474	5	4	10	4	1	1170	129.9	6.93	15.26	4	0	0.00131496	146.977
157	High	Master Protein	P57088	Transmembrane protein 33 [OS=Homo sapiens]	0	16.088	18	5	11	5	1	247	28	9.7	23.23	5	0	0.000508386	145.488
158	High	Master Protein	P14866	Heterogeneous nuclear ribonucleoprotein L [OS=Homo sapiens]	0	132.128	58	20	89	19	1	589	64.1	8.22	214.29	20	1	0.00146097	145.17
159	High	Master Protein	P46013	Proliferation marker protein Ki-67 [OS=Homo sapiens]	0	519.169	50	123	314	9	1	3256	358.5	9.45	632.45	123	112	0.00176553	144.129
160	High	Master Protein	P31942	Heterogeneous nuclear ribonucleoprotein H3 [OS=Homo sapiens]	0	38.484	32	7	22	7	1	346	36.9	6.87	52.04	7	0	0.000495982	143.446
161	High	Master Protein	O14979-1	Heterogeneous nuclear ribonucleoprotein D-like [OS=Homo sapiens]	0	46.663	21	11	37	9	1	420	46.4	9.57	63.82	11	0	0.00686846	142.473
162	High	Master Protein	Q8TDD1-2	Isoform 2 of ATP-dependent RNA helicase DDX54 [OS=Homo sapiens]	0	66.753	27	18	42	18	1	882	98.6	10.02	71.39	18	0	0.0182072	141.179
163	High	Master Protein	Q14676	Mediator of DNA damage checkpoint protein 1 [OS=Homo sapiens]	0	292.616	42	47	146	47	1	2089	226.5	5.47	372.14	47	0	0.000495982	136.044
164	High	Master Protein	Q5UIP0	Telomere-associated protein RIF1 [OS=Homo sapiens]	0	253.76	31	54	134	54	1	2472	274.3	5.52	248	54	0	0.00170916	135.468
165	High	Master Protein	O60832-1	H/ACA ribonucleoprotein complex subunit 4 [OS=Homo sapiens]	0	52.706	40	17	34	17	1	514	57.6	9.42	40.5	17	0	0.00357974	135.403
166	High	Master Protein	P38919	Eukaryotic initiation factor 4A-III [OS=Homo sapiens]	0	42.06	29	10	26	9	1	411	46.8	6.73	47.68	10	0	0.0151814	133.473
167	High	Master Protein	P62633-6	Isoform 6 of Cellular nucleic acid-binding protein [OS=Homo sapiens]	0	15.225	23	3	6	3	1	179	19.7	7.58	11.18	3	0	0.0199748	132.809
168	High	Master Protein	O75533-1	splicing factor 3B subunit 1 [OS=Homo sapiens]	0	53.181	16	15	30	15	1	1304	145.7	7.09	52.12	15	0	0.00150593	132.039
169	High	Master Protein	Q04637-9	Isoform 9 of Eukaryotic translation initiation factor 4 gamma 1 [OS=Homo sapiens]	0	48.28	11	14	28	14	1	1606	176.1	5.34	47.5	14	0	0.0164902	131.822
170	High	Master Protein	P35637-1	RNA-binding protein FUS [OS=Homo sapiens]	0	61.81	21	10	43	8	1	526	53.4	9.36	100.34	10	2	0.00242606	131.03
171	High	Master Protein	O75534-4	Isoform 4 of Cold shock domain-containing protein E1 [OS=Homo sapiens]	0	31.79	15	10	17	10	1	844	93.7	6.52	23.69	10	0	0.00467977	129.366
172	High	Master Protein	Q13123	Protein Red [OS=Homo sapiens]	0	43.509	29	12	25	12	1	557	65.6	6.64	27.14	12	0	0.00155173	128.94
173	High	Master Protein	Q9UHB9	Signal recognition particle subunit SRP68 [OS=Homo sapiens]	0	7.289	5	3	5	3	1	627	70.7	8.56	7.83	3	0	0.0013776	128.725
174	High	Master Protein	Q14566	DNA replication licensing factor MCM6 [OS=Homo sapiens]	0	42.696	17	12	26	12	1	821	92.8	5.41	45.76	12	0	0.00226747	128.094
175	High	Master Protein	Q14151	scaffold attachment factor B2 [OS=Homo sapiens]	0	198.13	44	45	128	30	1	953	107.4	6.16	250.61	45	15	0.0032558	127.933
176	High	Master Protein	P27708	CAD protein [OS=Homo sapiens]	0	59.727	9	17	31	17	1	2225	242.8	6.46	49.56	17	0	0.000536173	126.602
177	High	Master Protein	P15170-3	Isoform 3 of Eukaryotic peptide chain release factor GTP-binding subunit ERF3A [OS=Homo sapiens]	0	23.217	15	7	11	7	1	637	68.7	5.33	16.79	7	0	0.000495982	126.601
178	High	Master Protein	Q12769	nuclear pore complex protein Nup160 [OS=Homo sapiens]	0	54.513	12	15	31	15	1	1436	162	5.5	46.93	15	0	0.000742791	126.375
179	High	Master Protein	P38606	V-type proton ATPase catalytic subunit A [OS=Homo sapiens]	0	15.364	9	5	10	5	1	617	68.3	5.52	13.34	5	0	0.00160516	125.438
180	High	Master Protein	O00571	ATP-dependent RNA helicase DDX3X [OS=Homo sapiens]	0	102.298	40	23	64	22	1	662	73.2	7.18	120.1	23	0	0.000585127	125.309
181	High	Master Protein	Q8WUM4-2	Isoform 2 of Programmed cell death 6-interacting protein [OS=Homo sapiens]	0	48.071	18	12	24	12	1	873	96.7	6.52	38.6	12	0	0.0106207	124.055
182	High	Master Protein	P55786	puromycin-sensitive aminopeptidase [OS=Homo sapiens]	0	43.106	16	13	32	13	1	919	103.2	5.72	56.42	13	0	0.00818581	123.88
183	High	Master Protein	Q9ULV3	Cip1-interacting zinc finger protein [OS=Homo sapiens]	0	39.694	16	10	20	10	1	898	100	6.11	41.13	10	0	0.00211494	123.53
184	High	Master Protein	Q9Y383	Putative RNA-binding protein Luc7-like 2 [OS=Homo sapiens]	0	79.534	34	12	52	12	1	392	46.5	10.01	112.19	12	0	0.00146096	122.624
185	High	Master Protein	O14929	histone acetyltransferase type B catalytic subunit [OS=Homo sapiens]	0	26.009	19	5	11	5	1	419	49.5	5.69	21.9	5	0	0.000969809	122.62
186	High	Master Protein	P42704	Leucine-rich PPR motif-containing protein, mitochondrial [OS=Homo sapiens]	0	106.143	27	30	63	30	1	1394	157.8	6.13	103.78	30	0	0.00105383	122.051
187	High	Master Protein	Q14974	Importin subunit beta-1 [OS=Homo sapiens]	0	60.829	18	13	39	13	1	876	97.1	4.78	66.04	13	0	0.00144598	120.974
188	High	Master Protein	P55060-1	Exportin-2 [OS=Homo sapiens]	0	27.115	13	10	14	10	1	971	110.3	5.77	20.35	10	0	0.00892344	120.84
189	High	Master Protein	Q15269	Periodic tryptophan protein 2 homolog [OS=Homo sapiens]	0	46.268	18	11	31	11	1	919	102.4	6.15	42.25	11	0	0.00218311	120.29
190	High	Master Protein	O75844	caax prenyl protease 1 homolog [OS=Homo sapiens]	0	9.297	10	4	9	4	1	475	54.8	7.49	2.03	4	0	0.000575297	119.529
191	High	Master Protein	Q15365	Poly(RC)-binding protein 1 [OS=Homo sapiens]	0	86.29	54	13	64	9	1	356	37.5	7.09	103.15	13	4	0.000495982	117.303
192	High	Master Protein	P78527	DNA-dependent protein kinase catalytic subunit [OS=Homo sapiens]	0	399.015	28	100	217	100	1	4128	468.8	7.12	396.08	100	0	0.00108829	116.243
193	High	Master Protein	P31040	Succinate dehydrogenase [ubiquinone] flavoprotein subunit, mitochondrial [OS=Homo sapiens]	0	19.359	9	5	10	5	1	664	72.6	7.39	19.04	5	0	0.000495982	116.215
194	High	Master Protein	Q14498-1	RNA-binding protein 39 [OS=Homo sapiens]	0	35.373	18	8	20	8	1	530	59.3	10.1	36.25	8	0	0.00373608	115.837
195	High	Master Protein	Q5QJE6	Deoxynucleotidyltransferase terminal-interacting protein 2 [OS=Homo sapiens]	0	112.171	41	22	58	22	1	756	84.4	6.16	125.62	22	0	0.00214745	115.805
196	High	Master Protein	O43143	Pre-mRNA-splicing factor ATP-dependent RNA helicase DHX15 [OS=Homo sapiens]	0	132.15	44	32	103	32	1	795	90.9	7.46	155.42	32	0	0.000654536	113.808
197	High	Master Protein	O94842	TOX high mobility group box family member 4 [OS=Homo sapiens]	0	15.927	10	4	9	4	1	621	66.2	5.06	16.32	4	0	0.000530528	112.525
198	High	Master Protein	P22314	Ubiquitin-like modifier-activating enzyme 1 [OS=Homo sapiens]	0	164.383	35	30	96	30	1	1058	117.8	5.76	253.59	30	0	0.000536173	112.483
199	High	Master Protein	P52701	DNA mismatch repair protein MSH6 [OS=Homo sapiens]	0	75.996	22	22	42	22	1	1360	152.7	6.9	66.66	22	0	0.000854753	112.335
200	High	Master Protein	Q6P1J9	Parafibromin [OS=Homo sapiens]	0	37.324	28	12	19	12	1	531	60.5	9.61	40.6	12	0	0.000495982	112.055
201	High	Master Protein	Q9H7B2	Ribosome production factor 2 homolog [OS=Homo sapiens]	0	47.463	30	10	31	10	1	306	35.6	9.99	66.51	10	0	0.0010699	110.976
202	High	Master Protein	P36551	Oxygen-dependent coproporphyrinogen-III oxidase, mitochondrial [OS=Homo sapiens]	0	29.405	22	8	15	8	1	454	50.1	8.25	22.97	8	0	0.00539599	110.474
203	High	Master Protein	P35249	replication factor C subunit 4 [OS=Homo sapiens]	0	37.881	28	9	26	9	1	363	39.7	8.02	36.9	9	0	0.000495982	109.526
204	High	Master Protein	Q6P2Q9	Pre-mRNA-processing-splicing factor 8 [OS=Homo sapiens]	0	134.312	20	41	75	41	1	2335	273.4	8.84	114.71	41	0	0.00146096	109.284
205	High	Master Protein	P35580-4	Isoform 4 of Myosin-10 [OS=Homo sapiens]	0	121.086	24	36	64	28	1	2007	232.4	5.55	82.88	36	0	0.00218549	108.283
206	High	Master Protein	P25398	40S ribosomal protein S12 [OS=Homo sapiens]	0	27.126	51	6	18	6	1	132	14.5	7.21	31.52	6	0	0.00316359	107.272
207	High	Master Protein	P84103	Serine/arginine-rich splicing factor 3 [OS=Homo sapiens]	0	15.03	18	3	11	2	1	164	19.3	11.65	25.01	3	0	0.00131298	107.177
208	High	Master Protein	Q15393-1	Splicing factor 3B subunit 3 [OS=Homo sapiens]	0	113.89	29	28	61	28	1	1217	135.5	5.26	121.11	28	0	0.00220917	105.304
209	High	Master Protein	P20700	Lamin-B1 [OS=Homo sapiens]	0	114.639	52	27	68	24	1	586	66.4	5.16	133.76	27	3	0.000495982	104.834
210	High	Master Protein	Q8IY37	Probable ATP-dependent RNA helicase DHX37 [OS=Homo sapiens]	0	53.75	19	16	29	16	1	1157	129.5	8.1	45.76	16	0	0.0172486	104.256
211	High	Master Protein	P46087-4	Isoform 4 of Probable 28S rRNA (cytosine(4447)-C(5))-methyltransferase [OS=Homo sapiens]	0	43.215	16	11	24	11	1	845	92.8	9.19	37.34	11	0	0.00219847	104.188
212	High	Master Protein	P25205-2	Isoform 2 of DNA replication licensing factor MCM3 [OS=Homo sapiens]	0	76.678	29	20	53	20	1	853	95.8	5.77	83	20	0	0.0025255	104.157
213	High	Master Protein	P62873	Guanine nucleotide-binding protein G(I)/G(S)/G(T) subunit beta-1 [OS=Homo sapiens]	0	14.47	17	4	8	2	1	340	37.4	6	13.31	4	2	0.00709374	103.826
214	High	Master Protein	Q96SK2	Transmembrane protein 209 [OS=Homo sapiens]	0	22.31	16	6	14	6	1	561	62.9	8.63	19.51	6	0	0.000495982	103.128
215	High	Master Protein	P49736	DNA replication licensing factor mcm2 [OS=Homo sapiens]	0	42.341	21	13	20	13	1	904	101.8	5.52	31.76	13	0	0.00160533	103.038
216	High	Master Protein	Q13111-1	Chromatin assembly factor 1 subunit A [OS=Homo sapiens]	0	49.825	20	14	24	14	1	956	106.9	5.94	35.03	14	0	0.00314564	102.572
217	High	Master Protein	Q14697-1	Neutral alpha-glucosidase AB [OS=Homo sapiens]	0	64.03	27	18	40	18	1	944	106.8	6.14	70.4	18	0	0.00602329	102.533
218	High	Master Protein	Q15233	Non-POU domain-containing octamer-binding protein [OS=Homo sapiens]	0	173.978	63	31	138	30	1	471	54.2	8.95	254.78	31	1	0.000789162	101.317
219	High	Master Protein	Q99873	protein arginine N-methyltransferase 1 [OS=Homo sapiens]	0	48.496	40	11	26	11	1	361	41.5	5.43	47.13	11	0	0.00611894	100.496
220	High	Master Protein	Q8N1G0	zinc finger protein 687 [OS=Homo sapiens]	0	18.755	8	6	11	6	1	1237	129.4	8.19	7.99	6	0	0.00316359	100.052
221	High	Master Protein	P22626	heterogeneous nuclear ribonucleoproteins A2/B1 [OS=Homo sapiens]	0	119.762	54	21	87	19	1	353	37.4	8.95	169.9	21	0	0.000646074	99.463
222	High	Master Protein	Q9UJX3-1	Anaphase-promoting complex subunit 7 [OS=Homo sapiens]	0	36.671	23	9	19	9	1	599	66.8	5.64	31.28	9	0	0.00163751	98.381
223	High	Master Protein	P52597	Heterogeneous nuclear ribonucleoprotein F [OS=Homo sapiens]	0	46.385	23	6	33	4	1	415	45.6	5.58	81.13	6	0	0.00129008	97.925
224	High	Master Protein	P53007	Tricarboxylate transport protein, mitochondrial [OS=Homo sapiens]	0.001	4.439	11	3	3	3	1	311	34	9.89	0	3	0	0.000495982	96.337
225	High	Master Protein	Q15637-5	Isoform 5 of Splicing factor 1 [OS=Homo sapiens]	0	11.255	5	3	6	3	1	673	71.7	9.58	9.52	3	0	0.00397064	95.286
226	High	Master Protein	Q9NR30-1	Nucleolar RNA helicase 2 [OS=Homo sapiens]	0	290.663	56	45	225	43	1	783	87.3	9.28	527.02	45	2	0.000495982	95.099
227	High	Master Protein	Q9NXF1	Testis-expressed protein 10 [OS=Homo sapiens]	0	46.375	17	10	19	10	1	929	105.6	9.36	35.38	10	0	0.00178367	94.497
228	High	Master Protein	Q7Z5K2-3	Isoform 3 of Wings apart-like protein homolog [OS=Homo sapiens]	0	39.125	11	10	17	10	1	1275	142.4	6.06	25.34	10	0	0.00494718	94.462
229	High	Master Protein	P04843	Dolichyl-diphosphooligosaccharide--protein glycosyltransferase subunit 1 [OS=Homo sapiens]	0	100.876	45	21	57	21	1	607	68.5	6.38	138.53	21	0	0.000624884	94.355
230	High	Master Protein	Q5SRE5	Nucleoporin NUP188 homolog [OS=Homo sapiens]	0	57.125	12	17	27	17	1	1749	195.9	6.73	28.08	17	0	0.00134877	94.12
231	High	Master Protein	Q9BUQ8	Probable ATP-dependent RNA helicase DDX23 [OS=Homo sapiens]	0	24.816	11	9	16	9	1	820	95.5	9.55	22.61	9	0	0.000657802	93.521
232	High	Master Protein	Q96ST3	Paired amphipathic helix protein Sin3a [OS=Homo sapiens]	0	35.334	11	12	22	12	1	1273	145.1	7.25	31.15	12	0	0.0119401	93.008
233	High	Master Protein	Q6W2J9-1	BCL-6 corepressor [OS=Homo sapiens]	0	55.22	16	17	28	17	1	1755	192.1	6.48	30.27	17	0	0.0119835	92.719
234	High	Master Protein	Q6VMQ6-4	Isoform 3 of Activating transcription factor 7-interacting protein 1 [OS=Homo sapiens]	0	30.264	9	8	15	8	1	1278	137.4	4.72	21.46	8	0	0.000908475	92.697
235	High	Master Protein	Q9Y3F4-2	Isoform 2 of Serine-threonine kinase receptor-associated protein [OS=Homo sapiens]	0	48.787	46	11	25	11	1	363	39.8	5.31	34.49	11	0	0.00194436	91.554
236	High	Master Protein	Q06265-2	Isoform 2 of Exosome complex component RRP45 [OS=Homo sapiens]	0	5.766	5	2	5	2	1	456	50.8	5.3	3.95	2	0	0.000592594	91.449
237	High	Master Protein	Q05519	serine/arginine-rich splicing factor 11 [OS=Homo sapiens]	0	36.568	19	6	18	6	1	484	53.5	10.52	46.69	6	0	0.000950845	90.987
238	High	Master Protein	P40763	Signal transducer and activator of transcription 3 [OS=Homo sapiens]	0	11.663	6	4	7	4	1	770	88	6.3	2.22	4	0	0.00358176	90.89
239	High	Master Protein	Q15029	116 kDa U5 small nuclear ribonucleoprotein component [OS=Homo sapiens]	0	87.097	33	23	54	22	1	972	109.4	5	97.98	23	0	0.0034627	90.338
240	High	Master Protein	Q9H0D6-1	5'-3' exoribonuclease 2 [OS=Homo sapiens]	0	83.377	33	20	47	20	1	950	108.5	7.47	78	20	0	0.0021492	90.071
241	High	Master Protein	Q9NZI8	Insulin-like growth factor 2 mRNA-binding protein 1 [OS=Homo sapiens]	0	58.203	29	13	34	11	1	577	63.4	9.2	74.71	13	2	0.0545586	88.99
242	High	Master Protein	P35606	Coatomer subunit beta' [OS=Homo sapiens]	0	36.96	16	12	23	12	1	906	102.4	5.27	24.34	12	0	0.00201852	88.642
243	High	Master Protein	O15067	Phosphoribosylformylglycinamidine synthase [OS=Homo sapiens]	0	37.881	13	11	21	11	1	1338	144.6	5.76	26.84	11	0	0.0106494	87.564
244	High	Master Protein	Q8WUA4-1	General transcription factor 3C polypeptide 2 [OS=Homo sapiens]	0	49.336	20	14	23	14	1	911	100.6	7.31	38.59	14	0	0.00218549	87.435
245	High	Master Protein	P49368-1	T-complex protein 1 subunit gamma [OS=Homo sapiens]	0	72.714	42	16	42	16	1	545	60.5	6.49	76.48	16	0	0.00427907	87.302
246	High	Master Protein	Q16531	DNA damage-binding protein 1 [OS=Homo sapiens]	0	22.673	10	8	10	8	1	1140	126.9	5.26	11.78	8	0	0.0024988	86.48
247	High	Master Protein	P40939	Trifunctional enzyme subunit alpha, mitochondrial [OS=Homo sapiens]	0	61.129	30	17	30	17	1	763	82.9	9.04	44.73	17	0	0.000753229	86.322
248	High	Master Protein	P02786	Transferrin receptor protein 1 [OS=Homo sapiens]	0	36.991	18	11	25	11	1	760	84.8	6.61	36.82	11	0	0.00219847	86.166
249	High	Master Protein	P46977	Dolichyl-diphosphooligosaccharide--protein glycosyltransferase subunit STT3A [OS=Homo sapiens]	0	17.239	9	8	13	7	1	705	80.5	8.07	9.22	8	1	0.0109992	85.514
250	High	Master Protein	P08195-4	Isoform 4 of 4F2 cell-surface antigen heavy chain [OS=Homo sapiens]	0	35.497	16	8	16	8	1	661	71.1	4.97	33.53	8	0	0.00107756	84.712
251	High	Master Protein	P57740	Nuclear pore complex protein Nup107 [OS=Homo sapiens]	0	50.333	19	14	27	14	1	925	106.3	5.43	33.86	14	0	0.000495982	84.256
252	High	Master Protein	Q92598	Heat shock protein 105 kDa [OS=Homo sapiens]	0	142.025	43	29	69	26	1	858	96.8	5.39	125.52	29	3	0.00338669	83.913
253	High	Master Protein	Q99714-1	3-hydroxyacyl-CoA dehydrogenase type-2 [OS=Homo sapiens]	0	55.959	65	10	25	10	1	261	26.9	7.78	51.16	10	0	0.00065159	83.51
254	High	Master Protein	P41250	Glycine--tRNA ligase [OS=Homo sapiens]	0	16.896	10	6	11	6	1	739	83.1	7.03	9.64	6	0	0.0072732	83.373
255	High	Master Protein	Q7Z6E9	E3 ubiquitin-protein ligase RBBP6 [OS=Homo sapiens]	0	12.202	4	5	7	5	1	1792	201.4	9.64	2.06	5	0	0.00219847	82.488
256	High	Master Protein	Q9Y5M8	signal recognition particle receptor subunit beta [OS=Homo sapiens]	0	19.353	21	4	11	4	1	271	29.7	9.04	19.53	4	0	0.00131605	82.157
257	High	Master Protein	Q9H078-1	Caseinolytic peptidase B protein homolog [OS=Homo sapiens]	0	12.449	6	3	7	3	1	707	78.7	9.01	12.72	3	0	0.00357745	81.854
258	High	Master Protein	P16615	Sarcoplasmic/endoplasmic reticulum calcium ATPase 2 [OS=Homo sapiens]	0	116.946	30	27	65	27	1	1042	114.7	5.34	128.5	27	0	0.00146096	81.724
259	High	Master Protein	Q9ULM3	YEATS domain-containing protein 2 [OS=Homo sapiens]	0	11.43	5	4	6	4	1	1422	150.7	8.98	7.08	4	0	0.00191876	81.371
260	High	Master Protein	P06748	Nucleophosmin [OS=Homo sapiens]	0	120.679	48	12	111	12	1	294	32.6	4.78	301.68	12	0	0.000705803	81.311
261	High	Master Protein	Q00325-2	Isoform B of Phosphate carrier protein, mitochondrial [OS=Homo sapiens]	0	32.964	29	8	17	8	1	361	39.9	9.36	27.01	8	0	0.000950845	81.149
262	High	Master Protein	Q9NY93	Probable ATP-dependent RNA helicase DDX56 [OS=Homo sapiens]	0	49.887	27	12	24	12	1	547	61.6	9.26	61.11	12	0	0.000495982	81.129
263	High	Master Protein	P56192	Methionine--tRNA ligase, cytoplasmic [OS=Homo sapiens]	0	45.984	20	12	24	12	1	900	101.1	6.16	33.62	12	0	0.00492864	81.019
264	High	Master Protein	Q9NTJ3-1	Structural maintenance of chromosomes protein 4 [OS=Homo sapiens]	0	42.638	11	13	25	13	1	1288	147.1	6.79	30.46	13	0	0.00103065	80.709
265	High	Master Protein	P54577	Tyrosine--tRNA ligase, cytoplasmic [OS=Homo sapiens]	0	10.937	11	4	4	4	1	528	59.1	7.05	6.32	4	0	0.00102656	80.329
266	High	Master Protein	Q9P035	Very-long-chain (3R)-3-hydroxyacyl-CoA dehydratase 3 [OS=Homo sapiens]	0	16.651	10	4	13	4	1	362	43.1	8.94	22.63	4	0	0.00164831	80.326
267	High	Master Protein	Q15286	Ras-related protein Rab-35 [OS=Homo sapiens]	0	18.603	29	5	12	3	1	201	23	8.29	26.69	5	0	0.00219544	79.81
268	High	Master Protein	P51659-1	peroxisomal multifunctional enzyme type 2 [OS=Homo sapiens]	0	79.207	36	17	40	17	1	736	79.6	8.84	84.87	17	0	0.00148121	79.709
269	High	Master Protein	P61956	small ubiquitin-related modifier 2 [OS=Homo sapiens]	0	12.703	27	3	13	2	1	95	10.9	5.5	17.44	3	1	0.00189886	78.63
270	High	Master Protein	Q8IY81	pre-rRNA processing protein FTSJ3 [OS=Homo sapiens]	0	102.366	37	19	57	19	1	847	96.5	8.4	114.91	19	0	0.00146096	78.6
271	High	Master Protein	P55884-2	Isoform 2 of Eukaryotic translation initiation factor 3 subunit B [OS=Homo sapiens]	0	25.294	11	8	17	8	1	873	99	5.08	27.57	8	0	0.00626653	76.803
272	High	Master Protein	P41091	eukaryotic translation initiation factor 2 subunit 3 [OS=Homo sapiens]	0	57.146	39	14	31	14	1	472	51.1	8.4	71.51	14	0	0.000495982	76.479
273	High	Master Protein	Q12931	heat shock protein 75 kDa, mitochondrial [OS=Homo sapiens]	0	66.916	25	13	37	12	1	704	80.1	8.21	74.27	13	0	0.00108854	76.35
274	High	Master Protein	Q9NSE4	Isoleucine--tRNA ligase, mitochondrial [OS=Homo sapiens]	0	18.13	7	6	11	6	1	1012	113.7	7.2	4.06	6	0	0.00663951	76.276
275	High	Master Protein	P43246-1	DNA mismatch repair protein MSH2 [OS=Homo sapiens]	0	51.409	21	15	28	15	1	934	104.7	5.77	52.07	15	0	0.000851686	75.705
276	High	Master Protein	Q9NZ01-1	Very-long-chain enoyl-CoA reductase [OS=Homo sapiens]	0	31.501	23	9	17	9	1	308	36	9.45	26.09	9	0	0.00474803	74.814
277	High	Master Protein	Q16629	serine/arginine-rich splicing factor 7 [OS=Homo sapiens]	0	36.123	32	9	25	8	1	238	27.4	11.82	58.87	9	1	0.005235	74.718
278	High	Master Protein	P46060	Ran GTPase-activating protein 1 [OS=Homo sapiens]	0	45.016	25	11	21	11	1	587	63.5	4.68	48.49	11	0	0.000822867	74.582
279	High	Master Protein	P08670	Vimentin [OS=Homo sapiens]	0	327.732	80	52	300	51	1	466	53.6	5.12	686.74	52	1	0.000495982	73.461
280	High	Master Protein	Q15459	splicing factor 3A subunit 1 [OS=Homo sapiens]	0	42.709	19	11	22	11	1	793	88.8	5.22	38.8	11	0	0.00128712	73.09
281	High	Master Protein	O15213	WD repeat-containing protein 46 [OS=Homo sapiens]	0	29.826	19	8	18	8	1	610	68	9.67	37.29	8	0	0.00115365	72.597
282	High	Master Protein	Q8WXA9-2	Isoform 2 of Splicing regulatory glutamine/lysine-rich protein 1 [OS=Homo sapiens]	0	18.389	11	5	10	5	1	624	71.6	10.2	12.65	5	0	0.00422864	72.317
283	High	Master Protein	P61619	Protein transport protein Sec61 subunit alpha isoform 1 [OS=Homo sapiens]	0	21.575	11	5	12	5	1	476	52.2	8.06	25.79	5	0	0.00129379	70.418
284	High	Master Protein	Q15436	protein transport protein Sec23A [OS=Homo sapiens]	0	12.82	8	5	6	5	1	765	86.1	7.08	7.82	5	0	0.00215651	70.091
285	High	Master Protein	Q15021	condensin complex subunit 1 [OS=Homo sapiens]	0	68.407	18	21	34	21	1	1401	157.1	6.61	43.45	21	0	0.00613512	68.344
286	High	Master Protein	P39880-3	Isoform 3 of Homeobox protein cut-like 1 [OS=Homo sapiens]	0	17.622	5	5	8	5	1	1516	165.6	5.86	8.08	5	0	0.00288208	68.192
287	High	Master Protein	Q13263	Transcription intermediary factor 1-beta [OS=Homo sapiens]	0	66.984	33	15	33	15	1	835	88.5	5.77	62.78	15	0	0.0134699	67.856
288	High	Master Protein	P04844-1	Dolichyl-diphosphooligosaccharide--protein glycosyltransferase subunit 2 [OS=Homo sapiens]	0	73.659	29	14	30	14	1	631	69.2	5.69	74.29	14	0	0.00677248	67.721
289	High	Master Protein	P11387	DNA topoisomerase 1 [OS=Homo sapiens]	0	49.451	20	13	30	13	1	765	90.7	9.31	45.51	13	0	0.000950845	67.632
290	High	Master Protein	Q8N163-1	Cell cycle and apoptosis regulator protein 2 [OS=Homo sapiens]	0	26.968	12	8	16	8	1	923	102.8	5.22	27.52	8	0	0.000983114	67.429
291	High	Master Protein	O15260-1	surfeit locus protein 4 [OS=Homo sapiens]	0	10.498	9	2	6	2	1	269	30.4	7.78	8.76	2	0	0.00348616	66.767
292	High	Master Protein	Q99460	26S proteasome non-ATPase regulatory subunit 1 [OS=Homo sapiens]	0	59.56	20	14	29	14	1	953	105.8	5.39	53.02	14	0	0.00102656	66.117
293	High	Master Protein	Q8N684-3	Isoform 3 of Cleavage and polyadenylation specificity factor subunit 7 [OS=Homo sapiens]	0	14.566	9	4	8	4	1	514	56.3	8.87	11.05	4	0	0.010892	65.938
294	High	Master Protein	Q9Y483	Metal-response element-binding transcription factor 2 [OS=Homo sapiens]	0	23.791	15	7	13	7	1	593	67.1	8.72	22.26	7	0	0.00155111	65.696
295	High	Master Protein	P53396-1	ATP-citrate synthase [OS=Homo sapiens]	0	111.532	35	28	65	28	1	1101	120.8	7.33	114.44	28	0	0.00513759	65.361
296	High	Master Protein	P12268	inosine-5'-monophosphate dehydrogenase 2 [OS=Homo sapiens]	0	68.854	36	17	34	16	1	514	55.8	6.9	80.81	17	1	0.0018774	65.086
297	High	Master Protein	Q9Y314	nitric oxide synthase-interacting protein [OS=Homo sapiens]	0	23.321	31	6	11	6	1	301	33.2	8.82	19.45	6	0	0.00657035	64.869
298	High	Master Protein	Q92841	Probable ATP-dependent RNA helicase DDX17 [OS=Homo sapiens]	0	156.114	52	34	105	25	1	729	80.2	8.27	199.85	34	10	0.00265423	64.865
299	High	Master Protein	Q15084-2	Isoform 2 of Protein disulfide-isomerase A6 [OS=Homo sapiens]	0	17.991	10	4	10	4	1	492	53.9	5.33	16.49	4	0	0.0050835	64.73
300	High	Master Protein	Q15366-3	Isoform 3 of Poly(rC)-binding protein 2 [OS=Homo sapiens]	0	58.117	36	10	50	6	1	362	38.2	6.79	93.09	10	0	0.000575921	64.611
301	High	Master Protein	O95757	Heat shock 70 kDa protein 4L [OS=Homo sapiens]	0	35.534	15	11	18	9	1	839	94.5	5.88	27.78	11	0	0.00923987	64.473
302	High	Master Protein	P31689-1	DnaJ homolog subfamily A member 1 [OS=Homo sapiens]	0	35.408	30	8	19	8	1	397	44.8	7.08	39.81	8	0	0.000950845	64.112
303	High	Master Protein	Q13200	26S proteasome non-ATPase regulatory subunit 2 [OS=Homo sapiens]	0	34.429	16	11	20	11	1	908	100.1	5.2	26.22	11	0	0.000495982	63.86
304	High	Master Protein	Q00839	Heterogeneous nuclear ribonucleoprotein U [OS=Homo sapiens]	0	261.171	50	42	184	42	1	825	90.5	6	426.97	42	0	0.000820306	63.4
305	High	Master Protein	P50454	Serpin H1 [OS=Homo sapiens]	0	19.397	20	5	7	5	1	418	46.4	8.69	16.1	5	0	0.00959384	62.48
306	High	Master Protein	P05023	Sodium/potassium-transporting ATPase subunit alpha-1 [OS=Homo sapiens]	0	122.759	30	24	73	24	1	1023	112.8	5.49	153.82	24	0	0.00248861	62.09
307	High	Master Protein	O43290	U4/U6.U5 tri-snRNP-associated protein 1 [OS=Homo sapiens]	0	27.44	17	10	19	10	1	800	90.2	6.13	30.51	10	0	0.00502901	62.008
308	High	Master Protein	Q8N726	Tumor suppressor ARF [OS=Homo sapiens]	0	10.267	25	3	7	3	1	132	13.9	12.41	15.24	3	0	0.000495982	61.867
309	High	Master Protein	P34897-1	Serine hydroxymethyltransferase, mitochondrial [OS=Homo sapiens]	0	48.811	32	12	27	12	1	504	56	8.53	42.83	12	0	0.000668737	61.696
310	High	Master Protein	P31153	S-adenosylmethionine synthase isoform type-2 [OS=Homo sapiens]	0	20.802	13	4	13	4	1	395	43.6	6.48	24.05	4	0	0.00226747	61.593
311	High	Master Protein	P53985	Monocarboxylate transporter 1 [OS=Homo sapiens]	0	31.204	7	5	15	5	1	500	53.9	8.66	38.88	5	0	0.00191002	61.542
312	High	Master Protein	Q9Y277	Voltage-dependent anion-selective channel protein 3 [OS=Homo sapiens]	0	55.59	51	11	33	10	1	283	30.6	8.66	68.73	11	1	0.00134877	61.42
313	High	Master Protein	Q15181	Inorganic pyrophosphatase [OS=Homo sapiens]	0	13.19	16	3	7	2	1	289	32.6	5.86	14.59	3	1	0.00129379	61.235
314	High	Master Protein	P54886	delta-1-pyrroline-5-carboxylate synthase [OS=Homo sapiens]	0	45.857	20	12	26	12	1	795	87.2	7.12	61.85	12	0	0.000980371	61.213
315	High	Master Protein	Q8WTT2	Nucleolar complex protein 3 homolog [OS=Homo sapiens]	0	17.902	8	5	12	5	1	800	92.5	9.17	14.63	5	0	0.00263068	61.14
316	High	Master Protein	Q7L014	probable ATP-dependent RNA helicase DDX46 [OS=Homo sapiens]	0	43.615	15	13	28	13	1	1031	117.3	9.29	38.35	13	0	0.00266302	61.119
317	High	Master Protein	Q08945	FACT complex subunit SSRP1 [OS=Homo sapiens]	0	66.289	23	16	34	16	1	709	81	6.87	67.35	16	0	0.00457207	60.374
318	High	Master Protein	Q9NRX1	RNA-binding protein pno1 [OS=Homo sapiens]	0	17.442	26	5	10	5	1	252	27.9	9.73	24.86	5	0	0.00767223	60.274
319	High	Master Protein	Q9NYV4-1	Cyclin-dependent kinase 12 [OS=Homo sapiens]	0	13.655	4	4	8	3	1	1490	164.1	9.44	14.67	4	1	0.000670653	60.13
320	High	Master Protein	P63241-2	Isoform 2 of Eukaryotic translation initiation factor 5A-1 [OS=Homo sapiens]	0	31.28	39	6	16	6	1	184	20.2	7.01	33.29	6	0	0.00265423	59.94
321	High	Master Protein	P45974-1	Ubiquitin carboxyl-terminal hydrolase 5 [OS=Homo sapiens]	0	18.123	8	5	10	5	1	858	95.7	5.03	18.29	5	0	0.00467977	59.108
322	High	Master Protein	P11586	C-1-tetrahydrofolate synthase, cytoplasmic [OS=Homo sapiens]	0	36.045	17	13	17	13	1	935	101.5	7.3	26.97	13	0	0.0034627	58.813
323	High	Master Protein	P31948-2	Isoform 2 of Stress-induced-phosphoprotein 1 [OS=Homo sapiens]	0	23.485	14	7	14	7	1	590	68	7.74	13.31	7	0	0.00288833	58.584
324	High	Master Protein	Q6UWP7-1	Lysocardiolipin acyltransferase 1 [OS=Homo sapiens]	0	9.032	10	3	5	3	1	414	48.9	8.62	8.64	3	0	0.00812246	57.865
325	High	Master Protein	Q9UNX4	WD repeat-containing protein 3 [OS=Homo sapiens]	0	46.536	18	13	26	13	1	943	106	6.64	43.72	13	0	0.00910612	57.363
326	High	Master Protein	P49915	GMP synthase [glutamine-hydrolyzing] [OS=Homo sapiens]	0	53.354	25	14	28	14	1	693	76.7	6.87	49.98	14	0	0.00377438	57.175
327	High	Master Protein	P05455	Lupus La protein [OS=Homo sapiens]	0	15.876	13	4	8	4	1	408	46.8	7.12	13.66	4	0	0.00151354	56.549
328	High	Master Protein	P53618	Coatomer subunit beta [OS=Homo sapiens]	0	43.902	14	10	23	10	1	953	107.1	6.05	43.82	10	0	0.00306191	56.497
329	High	Master Protein	P04080	Cystatin-B [OS=Homo sapiens]	0	8.704	34	2	4	2	1	98	11.1	7.56	8.4	2	0	0.00214506	56.191
330	High	Master Protein	Q9P258	Protein RCC2 [OS=Homo sapiens]	0	72.81	32	14	42	14	1	522	56	8.78	101.1	14	0	0.00134877	55.938
331	High	Master Protein	O43707	Alpha-actinin-4 [OS=Homo sapiens]	0	52.577	21	15	24	9	1	911	104.8	5.44	40.61	15	6	0.00126462	55.468
332	High	Master Protein	P14625	Endoplasmin [OS=Homo sapiens]	0	79.555	27	19	46	17	1	803	92.4	4.84	94.73	19	0	0.000938156	55.115
333	High	Master Protein	P22087	rRNA 2'-O-methyltransferase fibrillarin [OS=Homo sapiens]	0	71.381	42	13	37	13	1	321	33.8	10.18	108.94	13	0	0.000764962	54.967
334	High	Master Protein	P50914	60S ribosomal protein L14 [OS=Homo sapiens]	0	28.979	24	5	20	5	1	215	23.4	10.93	46.35	5	0	0.000495982	54.131
335	High	Master Protein	Q08211	Atp-dependent rna helicase a [OS=Homo sapiens]	0	239.263	45	51	178	51	1	1270	140.9	6.84	352.42	51	0	0.000718684	53.503
336	High	Master Protein	Q15185	Prostaglandin E synthase 3 [OS=Homo sapiens]	0	6.118	13	2	4	2	1	160	18.7	4.54	6.3	2	0	0.00462327	53.337
337	High	Master Protein	P36578	60S ribosomal protein L4 [OS=Homo sapiens]	0	103.843	42	17	74	17	1	427	47.7	11.06	144.8	17	0	0.000536744	52.913
338	High	Master Protein	P27816-1	Microtubule-associated protein 4 [OS=Homo sapiens]	0	47.689	15	13	28	13	1	1152	120.9	5.43	54.26	13	0	0.000654536	52.822
339	High	Master Protein	Q14739	Lamin-B receptor [OS=Homo sapiens]	0	40.577	18	10	31	10	1	615	70.7	9.36	40.36	10	0	0.00642098	52.618
340	High	Master Protein	P18754-2	Isoform 2 of Regulator of chromosome condensation [OS=Homo sapiens]	0	90.147	53	14	41	14	1	452	48.1	8.16	105.41	14	0	0.000718684	52.345
341	High	Master Protein	P35658-5	Isoform 5 of Nuclear pore complex protein Nup214 [OS=Homo sapiens]	0	37.405	7	10	20	10	1	2093	215.3	7.69	40.61	10	0	0.000654536	52.282
342	High	Master Protein	P60953	Cell division control protein 42 homolog [OS=Homo sapiens]	0	18.462	37	5	9	4	1	191	21.2	6.55	12.14	5	0	0.00160091	52.177
343	High	Master Protein	Q9H0S4	Probable ATP-dependent RNA helicase DDX47 [OS=Homo sapiens]	0	45.268	33	11	26	11	1	455	50.6	9.1	58.99	11	0	0.00736768	51.954
344	High	Master Protein	O14617-5	Isoform 5 of AP-3 complex subunit delta-1 [OS=Homo sapiens]	0	30.316	10	7	16	7	1	1215	136.6	7.64	20.65	7	0	0.000935967	51.458
345	High	Master Protein	P08621-1	U1 small nuclear ribonucleoprotein 70 kDa [OS=Homo sapiens]	0	51.463	36	12	40	12	1	437	51.5	9.94	75.53	12	0	0.00233735	51.374
346	High	Master Protein	P62258-1	14-3-3 protein epsilon [OS=Homo sapiens]	0	26.102	39	8	13	6	1	255	29.2	4.74	26.98	8	0	0.0324761	51.372
347	High	Master Protein	P30153	serine/threonine-protein phosphatase 2A 65 kDa regulatory subunit A alpha isoform [OS=Homo sapiens]	0	57.658	28	12	28	12	1	589	65.3	5.11	60.99	12	0	0.000969809	51.237
348	High	Master Protein	Q13247	Serine/arginine-rich splicing factor 6 [OS=Homo sapiens]	0	26.728	19	8	21	7	1	344	39.6	11.43	32.71	8	1	0.000495982	51.065
349	High	Master Protein	Q16643-3	Isoform 3 of Drebrin [OS=Homo sapiens]	0	17.357	12	5	8	5	1	695	76.3	4.51	13.2	5	0	0.0106207	50.799
350	High	Master Protein	Q07020	60S ribosomal protein L18 [OS=Homo sapiens]	0	54.069	46	10	46	10	1	188	21.6	11.72	88.95	10	0	0.000495982	50.662
351	High	Master Protein	P33992	DNA replication licensing factor mcm5 [OS=Homo sapiens]	0	42.086	21	11	26	11	1	734	82.2	8.37	53.01	11	0	0.0089981	50.366
352	High	Master Protein	P48643	T-complex protein 1 subunit epsilon [OS=Homo sapiens]	0	76.092	35	16	38	15	1	541	59.6	5.66	66.34	16	0	0.000550856	50.351
353	High	Master Protein	Q9ULV4-3	Isoform 3 of Coronin-1C [OS=Homo sapiens]	0	31.161	18	8	16	8	1	527	58.9	7.75	23.57	8	0	0.0199419	50.088
354	High	Master Protein	Q76FK4	nucleolar protein 8 [OS=Homo sapiens]	0	60.069	23	18	33	18	1	1167	131.5	7.09	38.91	18	0	0.00161887	49.419
355	High	Master Protein	P61026	ras-related protein rab-10 [OS=Homo sapiens]	0	24.802	42	7	17	5	1	200	22.5	8.38	27.79	7	0	0.00177434	49.148
356	High	Master Protein	Q9Y221-1	60S ribosome subunit biogenesis protein NIP7 homolog [OS=Homo sapiens]	0	6.77	13	2	5	2	1	180	20.4	8.51	11.95	2	0	0.000980371	48.882
357	High	Master Protein	P13797	Plastin-3 [OS=Homo sapiens]	0	131.14	50	27	77	27	1	630	70.8	5.6	178.23	27	0	0.00178367	48.7
358	High	Master Protein	P30101	Protein disulfide-isomerase A3 [OS=Homo sapiens]	0	22.52	18	8	15	8	1	505	56.7	6.35	20.17	8	0	0.000495982	48.433
359	High	Master Protein	P14678-3	Isoform SM-B1 of Small nuclear ribonucleoprotein-associated proteins B and B' [OS=Homo sapiens]	0	18.913	17	5	8	5	1	289	30	10.18	17.35	5	0	0.00310017	48.3
360	High	Master Protein	Q14318-2	Isoform 2 of Peptidyl-prolyl cis-trans isomerase FKBP8 [OS=Homo sapiens]	0	18.519	12	4	9	4	1	413	44.6	4.84	22.62	4	0	0.00253334	48.281
361	High	Master Protein	Q6KC79	Nipped-B-like protein [OS=Homo sapiens]	0	64.251	10	21	36	21	1	2804	315.9	7.91	34.84	21	0	0.00176938	48.033
362	High	Master Protein	P09874	Poly [ADP-ribose] polymerase 1 [OS=Homo sapiens]	0	341.666	54	51	261	51	1	1014	113	8.88	544.66	51	0	0.00118811	47.928
363	High	Master Protein	P61006	Ras-related protein Rab-8A [OS=Homo sapiens]	0	25.74	30	6	16	2	1	207	23.7	9.07	21.44	6	1	0.00120868	47.78
364	High	Master Protein	O15371	Eukaryotic translation initiation factor 3 subunit D [OS=Homo sapiens]	0	12.808	13	4	6	4	1	548	63.9	6.05	13.28	4	0	0.0101985	47.665
365	High	Master Protein	Q9UBM7	7-dehydrocholesterol reductase [OS=Homo sapiens]	0	12.064	8	4	6	4	1	475	54.5	8.7	9.72	4	0	0.00130815	47.65
366	High	Master Protein	P24666-1	Low molecular weight phosphotyrosine protein phosphatase [OS=Homo sapiens]	0.001	3.478	13	2	2	2	1	158	18	6.74	1.73	2	0	0.00401651	47.154
367	High	Master Protein	Q99798	Aconitate hydratase, mitochondrial [OS=Homo sapiens]	0	25.387	11	6	11	6	1	780	85.4	7.61	21.88	6	0	0.027496	46.884
368	High	Master Protein	P35579-1	Myosin-9 [OS=Homo sapiens]	0	266.857	38	59	131	51	1	1960	226.4	5.6	263.71	59	7	0.000718684	46.858
369	High	Master Protein	Q13162	Peroxiredoxin-4 [OS=Homo sapiens]	0	56.343	44	10	34	7	1	271	30.5	6.29	72.92	10	0	0.00446127	46.855
370	High	Master Protein	P63104-1	14-3-3 protein zeta/delta [OS=Homo sapiens]	0	33.57	39	10	18	6	1	245	27.7	4.79	26.75	10	0	0.00263942	46.714
371	High	Master Protein	P49006	MARCKS-related protein [OS=Homo sapiens]	0	7.535	11	2	5	2	1	195	19.5	4.67	9.73	2	0	0.00197902	46.461
372	High	Master Protein	Q86VP6-1	cullin-associated nedd8-dissociated protein 1 [OS=Homo sapiens]	0	40.761	14	13	23	13	1	1230	136.3	5.78	25.15	13	0	0.00657035	45.973
373	High	Master Protein	P13010	X-ray repair cross-complementing protein 5 [OS=Homo sapiens]	0	87.739	31	21	54	21	1	732	82.7	5.81	94.16	21	0	0.000837626	45.971
374	High	Master Protein	Q00535	Cyclin-dependent-like kinase 5 [OS=Homo sapiens]	0	10.164	12	4	11	3	1	292	33.3	7.66	6.1	4	0	0.00281937	45.724
375	High	Master Protein	O75915	PRA1 family protein 3 [OS=Homo sapiens]	0	9.553	20	3	5	3	1	188	21.6	9.77	8.98	3	0	0.0045608	45.573
376	High	Master Protein	Q14011-2	Isoform 2 of Cold-inducible RNA-binding protein [OS=Homo sapiens]	0	6.638	12	2	5	2	1	263	28.3	8.6	3.91	2	0	0.0139437	45.462
377	High	Master Protein	Q9NPD3	Exosome complex component Rrp41 [OS=Homo sapiens]	0	14.799	18	4	8	4	1	245	26.4	6.52	10.93	4	0	0.000538322	45.192
378	High	Master Protein	Q03188	centromere protein C [OS=Homo sapiens]	0	19.887	10	7	13	7	1	943	106.8	9.39	11.28	7	0	0.000575921	44.957
379	High	Master Protein	Q8TEX9-2	Isoform 2 of Importin-4 [OS=Homo sapiens]	0	24.048	11	9	12	9	1	1083	118.8	4.94	7.82	9	0	0.000619683	44.877
380	High	Master Protein	P49411	elongation factor Tu, mitochondrial [OS=Homo sapiens]	0	78.376	52	18	52	18	1	452	49.5	7.61	100.35	18	0	0.000950845	44.869
381	High	Master Protein	P13667	Protein disulfide-isomerase A4 [OS=Homo sapiens]	0	25.254	17	8	16	8	1	645	72.9	5.07	26.08	8	0	0.0284829	44.725
382	High	Master Protein	P50991	T-complex protein 1 subunit delta [OS=Homo sapiens]	0	102.354	52	23	59	22	1	539	57.9	7.83	102.01	23	1	0.00446257	44.539
383	High	Master Protein	Q9H9B4	Sideroflexin-1 [OS=Homo sapiens]	0	8.032	13	3	4	3	1	322	35.6	9.07	2.44	3	0	0.0032395	43.91
384	High	Master Protein	P22234	multifunctional protein ADE2 [OS=Homo sapiens]	0	77.205	38	13	45	13	1	425	47	7.23	96.2	13	0	0.0010696	43.607
385	High	Master Protein	P17987	T-complex protein 1 subunit alpha [OS=Homo sapiens]	0	114.622	43	19	71	19	1	556	60.3	6.11	167.38	19	0	0.000495982	43.36
386	High	Master Protein	P31943	Heterogeneous nuclear ribonucleoprotein H [OS=Homo sapiens]	0	88.29	39	11	66	6	1	449	49.2	6.3	154.35	11	5	0.000950845	42.741
387	High	Master Protein	Q15758-1	Neutral amino acid transporter B(0) [OS=Homo sapiens]	0	17.534	12	4	9	4	1	541	56.6	5.48	8.9	4	0	0.00102656	42.562
388	High	Master Protein	Q9Y512	sorting and assembly machinery component 50 homolog [OS=Homo sapiens]	0	29.116	25	8	15	8	1	469	51.9	6.9	24.34	8	0	0.00282695	42.166
389	High	Master Protein	O75131	Copine-3 [OS=Homo sapiens]	0	33.92	22	9	17	9	1	537	60.1	5.85	29.89	9	0	0.00474803	41.959
390	High	Master Protein	Q8IXT5	RNA-binding protein 12B [OS=Homo sapiens]	0	24.657	9	8	13	8	1	1001	118	6.81	10.33	8	0	0.00504415	41.917
391	High	Master Protein	P47756-1	F-actin-capping protein subunit beta [OS=Homo sapiens]	0	19.219	25	5	13	5	1	277	31.3	5.59	28.66	5	0	0.00592946	41.61
392	High	Master Protein	P27348	14-3-3 protein theta [OS=Homo sapiens]	0	42.241	53	11	22	7	1	245	27.7	4.78	38.44	11	4	0.000716799	41.542
393	High	Master Protein	P28370-1	Probable global transcription activator SNF2L1 [OS=Homo sapiens]	0	60.78	15	17	44	5	1	1054	122.5	8.09	73.1	17	0	0.00160445	41.438
394	High	Master Protein	P14868	Aspartate--tRNA ligase, cytoplasmic [OS=Homo sapiens]	0	47.005	35	14	26	14	1	501	57.1	6.55	51.37	14	0	0.00178367	41.396
395	High	Master Protein	Q8WXX5	dnaJ homolog subfamily C member 9 [OS=Homo sapiens]	0	23.674	30	7	16	7	1	260	29.9	5.73	30.19	7	0	0.000495982	41.291
396	High	Master Protein	P41252	isoleucine--tRNA ligase, cytoplasmic [OS=Homo sapiens]	0	22.503	7	8	15	8	1	1262	144.4	6.15	22.93	8	0	0.00214574	41.227
397	High	Master Protein	P68032	Actin, alpha cardiac muscle 1 [OS=Homo sapiens]	0	97.646	38	15	122	2	1	377	42	5.39	220.54	15	0	0.024005	41.123
398	High	Master Protein	P05198	Eukaryotic translation initiation factor 2 subunit 1 [OS=Homo sapiens]	0	24.537	33	8	11	8	1	315	36.1	5.08	13.71	8	0	0.00121722	41.109
399	High	Master Protein	Q9BTE3-1	Mini-chromosome maintenance complex-binding protein [OS=Homo sapiens]	0	46.557	24	11	21	11	1	642	72.9	5.87	47.58	11	0	0.00367007	40.963
400	High	Master Protein	Q01085-2	Isoform 2 of Nucleolysin TIAR [OS=Homo sapiens]	0.001	4.698	6	2	3	2	1	392	43.4	7.99	0	2	0	0.00177092	40.828
401	High	Master Protein	P62917	60S ribosomal protein L8 [OS=Homo sapiens]	0	17.759	14	5	9	5	1	257	28	11.03	28.46	5	0	0.000495982	40.737
402	High	Master Protein	P61247	40S ribosomal protein S3a [OS=Homo sapiens]	0	42.591	45	11	24	11	1	264	29.9	9.73	42.06	11	0	0.00500352	40.579
403	High	Master Protein	P13639	Elongation factor 2 [OS=Homo sapiens]	0	274.966	57	48	229	47	1	858	95.3	6.83	468.34	48	1	0.00322658	40.132
404	High	Master Protein	Q9UN37	Vacuolar protein sorting-associated protein 4A [OS=Homo sapiens]	0	6.192	6	2	6	2	1	437	48.9	7.8	7.66	2	0	0.000646074	39.971
405	High	Master Protein	Q9H981-1	Actin-related protein 8 [OS=Homo sapiens]	0	6.523	5	2	4	2	1	624	70.4	7.78	2.55	2	0	0.00754626	39.369
406	High	Master Protein	Q96EA4	protein Spindly [OS=Homo sapiens]	0	21.266	17	7	11	7	1	605	70.1	5.47	14.74	7	0	0.00226747	39.299
407	High	Master Protein	Q9BZ95	Histone-lysine N-methyltransferase NSD3 [OS=Homo sapiens]	0	5.442	2	2	3	2	1	1437	161.5	8.21	1.61	2	0	0.013207	38.79
408	High	Master Protein	Q13310-3	Isoform 3 of Polyadenylate-binding protein 4 [OS=Homo sapiens]	0	40.025	19	10	18	5	1	660	72.3	9.35	27.54	10	0	0.0258499	37.954
409	High	Master Protein	Q7L2E3-2	Isoform 2 of Putative ATP-dependent RNA helicase DHX30 [OS=Homo sapiens]	0	25.256	10	10	15	10	1	1222	136	8.6	12.16	10	0	0.000495982	37.91
410	High	Master Protein	P04637	Cellular tumor antigen p53 [OS=Homo sapiens]	0	17.2	20	5	9	5	1	393	43.6	6.79	19.07	5	0	0.000820306	37.88
411	High	Master Protein	Q9NU22	Midasin [OS=Homo sapiens]	0	122.261	9	37	63	37	1	5596	632.4	5.68	90.14	37	0	0.0155168	37.712
412	High	Master Protein	O43390-1	heterogeneous nuclear ribonucleoprotein r [OS=Homo sapiens]	0	61.425	27	15	36	13	1	633	70.9	8.13	47.62	15	2	0.000700895	37.601
413	High	Master Protein	P09651-1	Heterogeneous nuclear ribonucleoprotein A1 [OS=Homo sapiens]	0	125.224	55	21	96	19	1	372	38.7	9.13	206.84	21	0	0.00157247	37.582
414	High	Master Protein	P07814	Bifunctional glutamate/proline--tRNA ligase [OS=Homo sapiens]	0	142.343	31	36	72	36	1	1512	170.5	7.33	126.86	36	0	0.000836102	37.56
415	High	Master Protein	P62995	transformer-2 protein homolog beta [OS=Homo sapiens]	0	15.572	20	6	13	6	1	288	33.6	11.25	21.68	6	0	0.000495982	36.967
416	High	Master Protein	O94925-1	Glutaminase kidney isoform, mitochondrial [OS=Homo sapiens]	0	10.127	5	2	5	2	1	669	73.4	7.77	8.6	2	0	0.00160516	36.638
417	High	Master Protein	P61221	ATP-binding cassette sub-family E member 1 [OS=Homo sapiens]	0	29.034	16	8	17	8	1	599	67.3	8.34	31.48	8	0	0.00219847	36.188
418	High	Master Protein	Q14202	Zinc finger MYM-type protein 3 [OS=Homo sapiens]	0	10.891	4	4	6	4	1	1370	152.3	6.35	9.9	4	0	0.00578485	35.994
419	High	Master Protein	P60709	Actin, cytoplasmic 1 [OS=Homo sapiens]	0	195.731	67	23	212	10	1	375	41.7	5.48	469.98	23	18	0.000495982	35.989
420	High	Master Protein	Q9Y5B9	FACT complex subunit SPT16 [OS=Homo sapiens]	0	76.01	21	19	51	19	1	1047	119.8	5.66	100.89	19	0	0.000935967	35.969
421	High	Master Protein	P21333	Filamin-A [OS=Homo sapiens]	0	204.608	30	53	107	51	1	2647	280.6	6.06	224.01	53	2	0.0351789	35.626
422	High	Master Protein	Q99567	Nuclear pore complex protein Nup88 [OS=Homo sapiens]	0	21.328	13	7	12	7	1	741	83.5	5.69	13.93	7	0	0.000648166	35.497
423	High	Master Protein	P26196	Probable ATP-dependent RNA helicase DDX6 [OS=Homo sapiens]	0	19.923	21	7	14	7	1	483	54.4	8.66	25.73	7	0	0.00066642	35.205
424	High	Master Protein	P10515	Dihydrolipoyllysine-residue acetyltransferase component of pyruvate dehydrogenase complex, mitochondrial [OS=Homo sapiens]	0	27.294	22	8	15	8	1	647	69	7.84	10.03	8	0	0.000747232	34.901
425	High	Master Protein	Q96EY7-1	pentatricopeptide repeat domain-containing protein 3, mitochondrial [OS=Homo sapiens]	0	8.588	6	3	3	3	1	689	78.5	6.42	3.63	3	0	0.000702242	34.747
426	High	Master Protein	P27635	60S ribosomal protein L10 [OS=Homo sapiens]	0	24.88	41	7	22	7	1	214	24.6	10.08	39.84	7	0	0.000646074	34.538
427	High	Master Protein	Q9Y5A9-1	YTH domain-containing family protein 2 [OS=Homo sapiens]	0.004	3.113	4	2	3	2	1	579	62.3	8.79	0	2	0	0.00412986	34.528
428	High	Master Protein	O43175	D-3-phosphoglycerate dehydrogenase [OS=Homo sapiens]	0	64.846	36	14	49	14	1	533	56.6	6.71	104.33	14	0	0.00059862	34.339
429	High	Master Protein	O14828	Secretory carrier-associated membrane protein 3 [OS=Homo sapiens]	0	11.144	13	3	3	3	1	347	38.3	7.64	5.55	3	0	0.00460201	34.269
430	High	Master Protein	Q8NC51-2	Isoform 2 of Plasminogen activator inhibitor 1 RNA-binding protein [OS=Homo sapiens]	0	12.277	11	5	7	5	1	402	44.2	8.66	8.95	5	0	0.00151628	34.262
431	High	Master Protein	P84098	60S ribosomal protein L19 [OS=Homo sapiens]	0	11.905	18	4	6	4	1	196	23.5	11.47	5.82	4	0	0.00218549	34.225
432	High	Master Protein	P78371-1	T-complex protein 1 subunit beta [OS=Homo sapiens]	0	118.564	55	22	66	22	1	535	57.5	6.46	93.88	22	0	0.000619683	34.012
433	High	Master Protein	Q96G23	Ceramide synthase 2 [OS=Homo sapiens]	0	8.085	7	2	3	2	1	380	44.8	8.98	2.91	2	0	0.00596758	33.754
434	High	Master Protein	P34932	Heat shock 70 kDa protein 4 [OS=Homo sapiens]	0	70.975	29	17	42	15	1	840	94.3	5.19	56.18	17	0	0.00201891	33.749
435	High	Master Protein	Q14103	heterogeneous nuclear ribonucleoprotein D0 [OS=Homo sapiens]	0	56.235	38	14	43	12	1	355	38.4	7.81	62.81	14	2	0.00151492	33.32
436	High	Master Protein	P39023	60S ribosomal protein L3 [OS=Homo sapiens]	0	61.974	34	15	35	15	1	403	46.1	10.18	70.32	15	0	0.00161887	33.212
437	High	Master Protein	Q12888-2	Isoform 2 of TP53-binding protein 1 [OS=Homo sapiens]	0	24.585	5	5	11	5	1	1977	214	4.7	26.9	5	0	0.00214506	32.849
438	High	Master Protein	Q9NXV6	CDKN2A-interacting protein [OS=Homo sapiens]	0	19.278	18	7	11	7	1	580	61.1	9.01	4.29	7	0	0.00378888	32.52
439	High	Master Protein	Q00610-1	Clathrin heavy chain 1 [OS=Homo sapiens]	0	231.026	36	45	143	45	1	1675	191.5	5.69	265.17	45	0	0.00189886	32.471
440	High	Master Protein	Q13838-2	Isoform 2 of Spliceosome RNA helicase DDX39B [OS=Homo sapiens]	0	54.945	40	14	47	6	1	443	50.6	5.88	88.03	14	8	0.00146096	32.403
441	High	Master Protein	Q9NRL2	Bromodomain adjacent to zinc finger domain protein 1A [OS=Homo sapiens]	0	74.98	16	19	48	19	1	1556	178.6	6.6	73.67	19	0	0.024019	32.216
442	High	Master Protein	Q99729-2	Isoform 2 of Heterogeneous nuclear ribonucleoprotein A/B [OS=Homo sapiens]	0	36.393	31	11	28	10	1	332	35.9	6.95	34.94	11	0	0.00295807	32.135
443	High	Master Protein	O95235	kinesin-like protein KIF20A [OS=Homo sapiens]	0	20.897	9	6	9	6	1	890	100.2	6.92	14.02	6	0	0.0106207	32.133
444	High	Master Protein	Q02543	60S ribosomal protein L18a [OS=Homo sapiens]	0	21.323	27	5	14	5	1	176	20.7	10.71	32.75	5	0	0.000959077	32.108
445	High	Master Protein	Q12873-3	Isoform 3 of Chromodomain-helicase-DNA-binding protein 3 [OS=Homo sapiens]	0	55.826	8	14	34	3	1	2059	232.9	6.23	52.89	14	0	0.00533334	31.899
446	High	Master Protein	P11940-1	Polyadenylate-binding protein 1 [OS=Homo sapiens]	0	72.272	33	17	39	12	1	636	70.6	9.5	65.22	17	4	0.000789162	31.854
447	High	Master Protein	P62851	40S ribosomal protein S25 [OS=Homo sapiens]	0	5.924	15	2	4	2	1	125	13.7	10.11	7.77	2	0	0.000530528	31.818
448	High	Master Protein	Q5QNW6-2	Isoform 2 of Histone H2B type 2-F [OS=Homo sapiens]	0	45.816	39	6	60	2	1	134	14.8	10.35	113.18	6	6	0.00163751	31.373
449	High	Master Protein	P17844	probable ATP-dependent RNA helicase DDX5 [OS=Homo sapiens]	0	121.198	50	28	93	19	1	614	69.1	8.92	189.87	28	0	0.00103065	31.197
450	High	Master Protein	Q9H0U4	ras-related protein Rab-1B [OS=Homo sapiens]	0	33.529	46	8	25	2	1	201	22.2	5.73	28.35	8	5	0.0028188	31.164
451	High	Master Protein	P27695	DNA-(apurinic or apyrimidinic site) lyase [OS=Homo sapiens]	0	25.272	33	6	15	6	1	318	35.5	8.12	20.82	6	0	0.0040758	31.09
452	High	Master Protein	P00505	Aspartate aminotransferase, mitochondrial [OS=Homo sapiens]	0	45.297	25	9	25	9	1	430	47.5	9.01	73.1	9	0	0.00306695	31.01
453	High	Master Protein	P38432	coilin [OS=Homo sapiens]	0	45.692	21	10	20	10	1	576	62.6	9.07	42.48	10	0	0.000956207	30.525
454	High	Master Protein	P12277	Creatine kinase B-type [OS=Homo sapiens]	0	32.942	25	6	14	6	1	381	42.6	5.59	30.99	6	0	0.00790284	30.158
455	High	Master Protein	O43684	Mitotic checkpoint protein BUB3 [OS=Homo sapiens]	0	46.043	32	8	32	8	1	328	37.1	6.84	58.16	8	0	0.00206906	29.867
456	High	Master Protein	O94826	Mitochondrial import receptor subunit TOM70 [OS=Homo sapiens]	0	13.281	9	4	8	4	1	608	67.4	7.12	17.76	4	0	0.000495982	29.75
457	High	Master Protein	P40227-1	T-complex protein 1 subunit zeta [OS=Homo sapiens]	0	54.218	36	16	41	16	1	531	58	6.68	63.31	16	0	0.000585127	29.634
458	High	Master Protein	O76021	Ribosomal L1 domain-containing protein 1 [OS=Homo sapiens]	0	78.651	35	19	45	19	1	490	54.9	10.13	83.89	19	0	0.00100556	29.214
459	High	Master Protein	Q13616	Cullin-1 [OS=Homo sapiens]	0	9.569	6	4	8	4	1	776	89.6	8	3.83	4	0	0.000890194	29.07
460	High	Master Protein	P45880-1	Isoform 1 of Voltage-dependent anion-selective channel protein 2 [OS=Homo sapiens]	0	61.871	48	11	51	11	1	309	33.4	7.59	102.08	11	0	0.000778344	28.174
461	High	Master Protein	Q8TED0	U3 small nucleolar RNA-associated protein 15 homolog [OS=Homo sapiens]	0	9.289	8	3	6	3	1	518	58.4	9.11	5.6	3	0	0.00343569	27.962
462	High	Master Protein	P49327	Fatty acid synthase [OS=Homo sapiens]	0	253.863	32	61	146	60	1	2511	273.3	6.44	278.83	61	1	0.00134656	27.686
463	High	Master Protein	P10809	60 kDa heat shock protein, mitochondrial [OS=Homo sapiens]	0	170.206	60	29	107	29	1	573	61	5.87	214.71	29	0	0.00139724	27.525
464	High	Master Protein	Q99832	T-complex protein 1 subunit eta [OS=Homo sapiens]	0	57.119	41	16	33	16	1	543	59.3	7.65	56.72	16	0	0.000654536	27.487
465	High	Master Protein	O15381-1	Nuclear valosin-containing protein-like [OS=Homo sapiens]	0	54.148	23	15	31	15	1	856	95	6.48	34.74	15	0	0.000950845	27.297
466	High	Master Protein	P22102-1	trifunctional purine biosynthetic protein adenosine-3 [OS=Homo sapiens]	0	88.149	34	21	41	21	1	1010	107.7	6.7	62.59	21	0	0.0120238	27.245
467	High	Master Protein	P28482	mitogen-activated protein kinase 1 [OS=Homo sapiens]	0	10.394	10	4	9	4	1	360	41.4	6.98	10.65	4	0	0.000495982	27.242
468	High	Master Protein	P30041	Peroxiredoxin-6 [OS=Homo sapiens]	0	17.688	27	6	13	6	1	224	25	6.38	14.39	6	0	0.00263068	27.158
469	High	Master Protein	P63000-2	Isoform B of Ras-related C3 botulinum toxin substrate 1 [OS=Homo sapiens]	0	11.405	19	3	4	2	1	211	23.5	8.63	10.37	3	0	0.00402083	27.119
470	High	Master Protein	Q6P9B9	Integrator complex subunit 5 [OS=Homo sapiens]	0	15.655	5	4	9	4	1	1019	107.9	7.05	15.63	4	0	0.00219847	26.824
471	High	Master Protein	Q14204	Cytoplasmic dynein 1 heavy chain 1 [OS=Homo sapiens]	0	57.045	5	19	29	19	1	4646	532.1	6.4	26.79	19	0	0.00161246	26.678
472	High	Master Protein	Q9BXJ9	N-alpha-acetyltransferase 15, NatA auxiliary subunit [OS=Homo sapiens]	0	16.992	8	7	14	7	1	866	101.2	7.42	7.55	7	0	0.000950845	26.31
473	High	Master Protein	P24534	Elongation factor 1-beta [OS=Homo sapiens]	0	5.884	11	2	3	2	1	225	24.7	4.67	4.13	2	0	0.00117853	26.103
474	High	Master Protein	P09622	Dihydrolipoyl dehydrogenase, mitochondrial [OS=Homo sapiens]	0	19.15	13	5	12	5	1	509	54.1	7.85	16.27	5	0	0.00628242	25.967
475	High	Master Protein	P50990	T-complex protein 1 subunit theta [OS=Homo sapiens]	0	71.845	43	19	37	19	1	548	59.6	5.6	72.6	19	0	0.000596343	25.937
476	High	Master Protein	P26373-1	60S ribosomal protein L13 [OS=Homo sapiens]	0	18.296	25	5	13	5	1	211	24.2	11.65	26.66	5	0	0.00142567	25.647
477	High	Master Protein	Q9P2E9-1	Ribosome-binding protein 1 [OS=Homo sapiens]	0	75.565	19	19	48	19	1	1410	152.4	8.6	97.57	19	0	0.000884949	25.577
478	High	Master Protein	P12956	X-ray repair cross-complementing protein 6 [OS=Homo sapiens]	0	73.16	39	16	33	16	1	609	69.8	6.64	73.45	16	0	0.00151492	25.46
479	High	Master Protein	O75390	citrate synthase, mitochondrial [OS=Homo sapiens]	0	13.49	9	4	10	4	1	466	51.7	8.32	17	4	0	0.000495982	25.25
480	High	Master Protein	P42126	Enoyl-CoA delta isomerase 1, mitochondrial [OS=Homo sapiens]	0.001	3.705	7	2	2	2	1	302	32.8	8.54	1.67	2	0	0.000654536	25.083
481	High	Master Protein	B5ME19	eukaryotic translation initiation factor 3 subunit C-like protein [OS=Homo sapiens]	0	7.92	4	4	5	4	1	914	105.4	5.64	3.88	4	0	0.000495982	24.76
482	High	Master Protein	Q15022	Polycomb protein suz12 [OS=Homo sapiens]	0	42.158	21	13	24	13	1	739	83	8.81	42.85	13	0	0.00310017	24.725
483	High	Master Protein	O60318	Germinal-center associated nuclear protein [OS=Homo sapiens]	0	31.397	10	11	18	11	1	1980	218.3	6.39	27.6	11	0	0.00132231	24.476
484	High	Master Protein	Q9Y2J2	Band 4.1-like protein 3 [OS=Homo sapiens]	0	6.226	2	2	4	2	1	1087	120.6	5.19	1.92	2	0	0.000530528	24.294
485	High	Master Protein	P26641-2	Isoform 2 of Elongation factor 1-gamma [OS=Homo sapiens]	0	71.092	31	16	58	16	1	487	56.1	7.72	110.5	16	0	0.000722127	24.187
486	High	Master Protein	P23396-1	40S ribosomal protein S3 [OS=Homo sapiens]	0	72.868	71	17	58	17	1	243	26.7	9.66	130.69	17	0	0.0010699	24.127
487	High	Master Protein	P15531-2	Isoform 2 of Nucleoside diphosphate kinase A [OS=Homo sapiens]	0	24.958	40	6	17	6	1	177	19.6	5.58	27.69	6	0	0.00214506	24.073
488	High	Master Protein	P23246-1	splicing factor, proline- and glutamine-rich [OS=Homo sapiens]	0	38.425	15	10	29	9	1	707	76.1	9.44	48.73	10	0	0.00252655	24.063
489	High	Master Protein	P50402	Emerin [OS=Homo sapiens]	0	18.953	20	4	13	4	1	254	29	5.5	20.08	4	0	0.0234476	23.867
490	High	Master Protein	Q15008-4	Isoform 4 of 26S proteasome non-ATPase regulatory subunit 6 [OS=Homo sapiens]	0	7.779	8	3	5	3	1	442	51.9	6.74	7.32	3	0	0.00611585	23.635
491	High	Master Protein	P35232	Prohibitin [OS=Homo sapiens]	0	6.347	8	2	2	2	1	272	29.8	5.76	4.34	2	0	0.00761503	23.525
492	High	Master Protein	P05141	ADP/ATP translocase 2 [OS=Homo sapiens]	0	56.753	45	16	59	5	1	298	32.8	9.69	109.6	16	10	0.00241377	23.514
493	High	Master Protein	P51149	ras-related protein Rab-7a [OS=Homo sapiens]	0	16.873	20	3	9	3	1	207	23.5	6.7	23.12	3	0	0.000840736	23.232
494	High	Master Protein	P62979	Ubiquitin-40S ribosomal protein S27a [OS=Homo sapiens]	0	49.606	54	10	132	10	1	156	18	9.64	219.96	10	0	0.00192692	23.221
495	High	Master Protein	P62241	40S ribosomal protein S8 [OS=Homo sapiens]	0	53.961	58	12	34	12	1	208	24.2	10.32	62.53	12	0	0.00134656	22.57
496	High	Master Protein	P30050-1	60S ribosomal protein L12 [OS=Homo sapiens]	0	41.984	60	7	25	7	1	165	17.8	9.42	64.38	7	0	0.00211059	22.342
497	High	Master Protein	P68363	Tubulin alpha-1B chain [OS=Homo sapiens]	0	127.07	53	18	116	2	1	451	50.1	5.06	235.49	18	18	0.00167974	21.832
498	High	Master Protein	Q02878	60S ribosomal protein L6 [OS=Homo sapiens]	0	47.506	38	11	38	11	1	288	32.7	10.58	74.87	11	0	0.00193921	21.664
499	High	Master Protein	O95831-1	Apoptosis-inducing factor 1, mitochondrial [OS=Homo sapiens]	0	8.033	8	4	7	4	1	613	66.9	8.95	6.85	4	0	0.00134877	21.568
500	High	Master Protein	P50395-1	Rab GDP dissociation inhibitor beta [OS=Homo sapiens]	0	7.384	7	2	3	2	1	445	50.6	6.47	2.4	2	0	0.00230613	21.261
501	High	Master Protein	P04075-2	Isoform 2 of Fructose-bisphosphate aldolase A [OS=Homo sapiens]	0	61.553	42	14	45	13	1	418	45.2	8.25	97.35	14	1	0.0022606	21.189
502	High	Master Protein	Q92688	Acidic leucine-rich nuclear phosphoprotein 32 family member B [OS=Homo sapiens]	0	7.682	8	2	3	2	1	251	28.8	4.06	5.05	2	0	0.0151955	21.184
503	High	Master Protein	P07437	tubulin beta chain [OS=Homo sapiens]	0	185.665	74	27	156	6	1	444	49.6	4.89	285.58	27	29	0.00108315	21.039
504	High	Master Protein	Q7Z6Z7	E3 ubiquitin-protein ligase HUWE1 [OS=Homo sapiens]	0	17.399	3	6	8	6	1	4374	481.6	5.22	10.49	6	0	0.00953739	20.95
505	High	Master Protein	P07910-1	Heterogeneous nuclear ribonucleoproteins C1/C2 [OS=Homo sapiens]	0	59.107	32	10	52	10	1	306	33.7	5.08	100.78	10	0	0.00113898	20.936
506	High	Master Protein	P00390	Glutathione reductase, mitochondrial [OS=Homo sapiens]	0	11.427	9	3	5	3	1	522	56.2	8.5	9.68	3	0	0.0212317	20.788
507	High	Master Protein	P62753	40S RIBOSOMAL PROTEIN S6 [OS=Homo sapiens]	0	18.217	28	6	14	6	1	249	28.7	10.84	22.75	6	0	0.001161	20.738
508	High	Master Protein	P68371	Tubulin beta-4B chain [OS=Homo sapiens]	0	166.473	68	26	136	5	1	445	49.8	4.89	239.6	26	0	0.000935967	20.62
509	High	Master Protein	P46777	60S ribosomal protein L5 [OS=Homo sapiens]	0	70.375	41	13	53	13	1	297	34.3	9.72	112.03	13	0	0.00252655	20.595
510	High	Master Protein	P12004	proliferating cell nuclear antigen [OS=Homo sapiens]	0	18.266	35	7	13	7	1	261	28.8	4.69	13.69	7	0	0.000983114	20.457
511	High	Master Protein	Q969X6	U3 small nucleolar RNA-associated protein 4 homolog [OS=Homo sapiens]	0	13.825	10	5	8	5	1	686	76.8	8.85	2.13	5	0	0.00659164	20.376
512	High	Master Protein	P46776	60S ribosomal protein L27a [OS=Homo sapiens]	0	6.546	16	2	5	2	1	148	16.6	11	8.68	2	0	0.00104846	20.182
513	High	Master Protein	P38646	Stress-70 protein, mitochondrial [OS=Homo sapiens]	0	183.581	51	27	123	27	1	679	73.6	6.16	241.08	27	0	0.00794518	19.996
514	High	Master Protein	Q92900	Regulator of nonsense transcripts 1 [OS=Homo sapiens]	0	5.57	2	2	3	2	1	1129	124.3	6.61	0	2	0	0.0237258	19.918
515	High	Master Protein	P07737	profilin-1 [OS=Homo sapiens]	0	23.541	33	4	15	4	1	140	15	8.27	32.76	4	0	0.00378888	19.785
516	High	Master Protein	Q92793-1	CREB-binding protein [OS=Homo sapiens]	0	9.081	2	3	5	2	1	2442	265.2	8.53	2.57	3	1	0.00967388	19.779
517	High	Master Protein	O94762-1	ATP-dependent DNA helicase Q5 [OS=Homo sapiens]	0	9.306	3	3	7	3	1	991	108.8	8.56	7.17	3	0	0.00148121	19.622
518	High	Master Protein	P42677	40S ribosomal protein S27 [OS=Homo sapiens]	0	24.27	40	4	15	2	1	84	9.5	9.45	36.74	4	3	0.00322395	19.558
519	High	Master Protein	P62829	60S ribosomal protein L23 [OS=Homo sapiens]	0	12.552	32	3	8	3	1	140	14.9	10.51	9.57	3	0	0.0196662	19.378
520	High	Master Protein	P48444	Coatomer subunit delta [OS=Homo sapiens]	0	15.03	14	6	8	6	1	511	57.2	6.21	8.37	6	0	0.000971631	19.033
521	High	Master Protein	P68104	Elongation factor 1-alpha 1 [OS=Homo sapiens]	0	165.491	65	23	198	23	1	462	50.1	9.01	470.84	23	0	0.00269025	18.603
522	High	Master Protein	P23526-1	Adenosylhomocysteinase [OS=Homo sapiens]	0	40.016	31	12	28	12	1	432	47.7	6.34	53.67	12	0	0.00430447	18.533
523	High	Master Protein	P60891	ribose-phosphate pyrophosphokinase 1 [OS=Homo sapiens]	0	20.994	23	6	14	6	1	318	34.8	6.98	17.36	6	0	0.00219847	18.526
524	High	Master Protein	P07900-2	Isoform 2 of Heat shock protein HSP 90-alpha [OS=Homo sapiens]	0	142.063	33	30	109	16	1	854	98.1	5.16	214.53	30	0	0.00181834	18.462
525	High	Master Protein	P18085	ADP-ribosylation factor 4 [OS=Homo sapiens]	0	9.4	22	3	6	3	1	180	20.5	7.14	9.29	3	0	0.0117038	18.403
526	High	Master Protein	P61224-1	Ras-related protein Rap-1b [OS=Homo sapiens]	0	11.261	22	4	5	4	1	184	20.8	5.78	1.96	4	0	0.00520879	18.196
527	High	Master Protein	Q969H8	Myeloid-derived growth factor [OS=Homo sapiens]	0	9.05	16	2	6	2	1	173	18.8	6.68	11.81	2	0	0.000983114	18.179
528	High	Master Protein	Q9UHD1	cysteine and histidine-rich domain-containing protein 1 [OS=Homo sapiens]	0	36.088	44	8	19	8	1	332	37.5	7.87	28.59	8	0	0.00374792	18.011
529	High	Master Protein	P83731	60S ribosomal protein L24 [OS=Homo sapiens]	0	9.481	19	3	8	3	1	157	17.8	11.25	14.32	3	0	0.00603698	17.974
530	High	Master Protein	P40926	Malate dehydrogenase, mitochondrial [OS=Homo sapiens]	0	64.631	53	13	40	13	1	338	35.5	8.68	78.47	13	0	0.00151354	17.448
531	High	Master Protein	P62937	peptidyl-prolyl cis-trans isomerase A [OS=Homo sapiens]	0	44.648	44	9	43	9	1	165	18	7.81	51.97	9	0	0.00596758	17.411
532	High	Master Protein	P25705-1	ATP synthase subunit alpha, mitochondrial [OS=Homo sapiens]	0	49.242	25	12	28	12	1	553	59.7	9.13	58.38	12	0	0.000495982	17.399
533	High	Master Protein	P00558	phosphoglycerate kinase 1 [OS=Homo sapiens]	0	25.197	16	4	8	4	1	417	44.6	8.1	14.86	4	0	0.00931902	17.211
534	High	Master Protein	Q16836-2	Isoform 2 of Hydroxyacyl-coenzyme A dehydrogenase, mitochondrial [OS=Homo sapiens]	0	6.121	8	3	4	3	1	390	42.1	9.26	1.98	3	0	0.000495982	17.079
535	High	Master Protein	P62266	40S ribosomal protein S23 [OS=Homo sapiens]	0	17.179	24	3	14	3	1	143	15.8	10.49	34.39	3	0	0.000789162	16.842
536	High	Master Protein	P62314	Small nuclear ribonucleoprotein Sm D1 [OS=Homo sapiens]	0	25.517	55	5	13	5	1	119	13.3	11.56	33.45	5	0	0.00358176	16.818
537	High	Master Protein	P08238	Heat shock protein HSP 90-beta [OS=Homo sapiens]	0	177.129	44	36	142	20	1	724	83.2	5.03	261.66	36	17	0.00140837	16.536
538	High	Master Protein	O14654	insulin receptor substrate 4 [OS=Homo sapiens]	0	14.854	5	4	8	4	1	1257	133.7	8.44	6.29	4	0	0.0279212	16.441
539	High	Master Protein	P62249	40S ribosomal protein S16 [OS=Homo sapiens]	0	8.253	19	3	11	3	1	146	16.4	10.21	10.76	3	0	0.00120988	16.409
540	High	Master Protein	P49207	60S ribosomal protein L34 [OS=Homo sapiens]	0.001	4.329	15	2	3	2	1	117	13.3	11.47	5.08	2	0	0.0019137	16.377
541	High	Master Protein	Q6P2E9-1	Enhancer of mRNA-decapping protein 4 [OS=Homo sapiens]	0	13.802	5	4	5	4	1	1401	151.6	5.86	4.03	4	0	0.015188	16.372
542	High	Master Protein	P30048	Thioredoxin-dependent peroxide reductase, mitochondrial [OS=Homo sapiens]	0	30.705	33	6	12	6	1	256	27.7	7.78	20.91	6	0	0.00243342	16.276
543	High	Master Protein	P09972	Fructose-bisphosphate aldolase C [OS=Homo sapiens]	0	13.707	9	3	6	2	1	364	39.4	6.87	13.32	3	0	0.00313407	16.251
544	High	Master Protein	Q9Y5K5-1	Ubiquitin carboxyl-terminal hydrolase isozyme L5 [OS=Homo sapiens]	0.001	4.139	7	2	3	2	1	329	37.6	5.33	0	2	0	0.00146096	16.138
545	High	Master Protein	P46778	60S ribosomal protein L21 [OS=Homo sapiens]	0	6.495	17	2	4	2	1	160	18.6	10.49	5.9	2	0	0.00292586	16.056
546	High	Master Protein	P14618	Pyruvate kinase PKM [OS=Homo sapiens]	0	143.131	55	23	97	23	1	531	57.9	7.84	211.24	23	0	0.00369222	15.934
547	High	Master Protein	P33991	DNA replication licensing factor MCM4 [OS=Homo sapiens]	0	29.213	14	8	12	8	1	863	96.5	6.74	21.21	8	0	0.00153595	15.741
548	High	Master Protein	Q8TEQ6	gem-associated protein 5 [OS=Homo sapiens]	0.001	4.255	3	2	2	2	1	1508	168.5	6.62	0	2	0	0.0267089	15.721
549	High	Master Protein	Q13148-1	TAR DNA-binding protein 43 [OS=Homo sapiens]	0	35.177	28	7	27	6	1	414	44.7	6.19	50.75	7	0	0.00145486	15.701
550	High	Master Protein	P15880	40S ribosomal protein S2 [OS=Homo sapiens]	0	27.872	31	8	23	8	1	293	31.3	10.24	40.07	8	0	0.000882984	15.631
551	High	Master Protein	P11021	78 kDa glucose-regulated protein [OS=Homo sapiens]	0	71.875	29	15	49	13	1	654	72.3	5.16	84.3	15	0	0.00146096	15.151
552	High	Master Protein	P53621-2	Isoform 2 of Coatomer subunit alpha [OS=Homo sapiens]	0	53.968	14	14	29	14	1	1233	139.2	7.59	49.92	14	0	0.000959077	14.957
553	High	Master Protein	P24752	Acetyl-CoA acetyltransferase, mitochondrial [OS=Homo sapiens]	0	29.691	22	8	15	8	1	427	45.2	8.85	24.92	8	0	0.003245	14.834
554	High	Master Protein	Q9C0C9	(E3-independent) E2 ubiquitin-conjugating enzyme [OS=Homo sapiens]	0	5.361	1	2	2	2	1	1292	141.2	5.12	2.08	2	0	0.00233735	14.805
555	High	Master Protein	Q9BWU0	kanadaptin [OS=Homo sapiens]	0	18.456	11	7	10	7	1	796	88.8	5.19	14.2	7	0	0.0185241	14.665
556	High	Master Protein	Q9UQ80	proliferation-associated protein 2G4 [OS=Homo sapiens]	0	28.484	29	9	17	9	1	394	43.8	6.55	23.5	9	0	0.000969809	14.523
557	High	Master Protein	P62701	40S ribosomal protein S4, X isoform [OS=Homo sapiens]	0	24.732	30	9	18	9	1	263	29.6	10.15	25.63	9	0	0.000541897	14.244
558	High	Master Protein	P46781	40S ribosomal protein S9 [OS=Homo sapiens]	0	16.858	28	6	14	6	1	194	22.6	10.65	18.94	6	0	0.00310017	14.088
559	High	Master Protein	Q06830	peroxiredoxin-1 [OS=Homo sapiens]	0	81.082	60	16	66	12	1	199	22.1	8.13	128.26	16	4	0.0061601	13.895
560	High	Master Protein	Q13151	Heterogeneous nuclear ribonucleoprotein A0 [OS=Homo sapiens]	0	39.935	36	11	29	9	1	305	30.8	9.29	55.66	11	0	0.00476978	13.801
561	High	Master Protein	P68431	Histone H3.1 [OS=Homo sapiens]	0	19.834	33	7	23	7	1	136	15.4	11.12	38.98	7	0	0.00108093	13.517
562	High	Master Protein	P51572-2	Isoform 2 of B-cell receptor-associated protein 31 [OS=Homo sapiens]	0	5.846	9	2	3	2	1	313	34.7	7.84	6.32	2	0	0.00233735	13.467
563	High	Master Protein	P62280	40S ribosomal protein S11 [OS=Homo sapiens]	0	18.906	42	7	17	7	1	158	18.4	10.3	22.64	7	0	0.00102172	13.326
564	High	Master Protein	P62424	60S ribosomal protein L7a [OS=Homo sapiens]	0	31.218	27	8	22	8	1	266	30	10.61	36.14	8	0	0.00107756	13.313
565	High	Master Protein	P99999	cytochrome c [OS=Homo sapiens]	0	5.442	24	2	2	2	1	105	11.7	9.57	3.32	2	0	0.013627	13.191
566	High	Master Protein	P61313-1	60S ribosomal protein L15 [OS=Homo sapiens]	0	25.66	35	6	18	6	1	204	24.1	11.62	29.56	6	0	0.0021492	12.796
567	High	Master Protein	P62826	GTP-binding nuclear protein RAN [OS=Homo sapiens]	0	50.365	44	11	49	11	1	216	24.4	7.49	79.91	11	0	0.00256069	12.582
568	High	Master Protein	O75530-2	Isoform 2 of Polycomb protein EED [OS=Homo sapiens]	0	10.358	8	3	5	3	1	466	53	7.36	10.11	3	0	0.026395	12.575
569	High	Master Protein	Q86WB0	Nuclear-interacting partner of ALK [OS=Homo sapiens]	0	23.875	20	7	12	7	1	502	55.2	5.62	21.09	7	0	0.0256806	12.409
570	High	Master Protein	Q12906-7	Isoform 7 of Interleukin enhancer-binding factor 3 [OS=Homo sapiens]	0	185.702	44	32	140	28	1	898	95.7	8.81	246.66	32	4	0.00160091	12.185
571	High	Master Protein	P62906	60S ribosomal protein L10A [OS=Homo sapiens]	0	15.346	26	4	12	4	1	217	24.8	9.94	8.15	4	0	0.00238056	12.182
572	High	Master Protein	O00629	Importin subunit alpha-3 [OS=Homo sapiens]	0	11.93	10	4	7	2	1	521	57.9	4.96	5.07	4	0	0.024294	11.542
573	High	Master Protein	O75821	Eukaryotic translation initiation factor 3 subunit G [OS=Homo sapiens]	0	26.034	18	7	13	7	1	320	35.6	6.13	21.14	7	0	0.039617	11.542
574	High	Master Protein	P60842	Eukaryotic initiation factor 4A-I [OS=Homo sapiens]	0	99.932	56	19	78	10	1	406	46.1	5.48	145.43	19	9	0.00373743	11.458
575	High	Master Protein	P40429	60S ribosomal protein L13a [OS=Homo sapiens]	0	10.316	17	4	10	4	1	203	23.6	10.93	9.23	4	0	0.00298363	11.404
576	High	Master Protein	P18124	60S ribosomal protein L7 [OS=Homo sapiens]	0	16.524	18	5	9	5	1	248	29.2	10.65	22.55	5	0	0.00211494	11.342
577	High	Master Protein	P08243-1	Asparagine synthetase [glutamine-hydrolyzing] [OS=Homo sapiens]	0	33.165	16	7	22	7	1	561	64.3	6.86	26.49	7	0	0.00636041	11.061
578	High	Master Protein	Q92667	A-kinase anchor protein 1, mitochondrial [OS=Homo sapiens]	0	24.439	10	7	12	7	1	903	97.3	4.94	15.22	7	0	0.000981553	11.047
579	High	Master Protein	A0AVT1-1	Ubiquitin-like modifier-activating enzyme 6 [OS=Homo sapiens]	0	19.116	6	6	12	6	1	1052	117.9	6.14	9.17	6	0	0.00556376	11.022
580	High	Master Protein	P18669	Phosphoglycerate mutase 1 [OS=Homo sapiens]	0	13.112	25	4	6	4	1	254	28.8	7.18	7.82	4	0	0.0092458	10.924
581	High	Master Protein	P62263	40S ribosomal protein S14 [OS=Homo sapiens]	0	14.249	19	4	10	4	1	151	16.3	10.05	14.35	4	0	0.00818581	10.707
582	High	Master Protein	Q14152	Eukaryotic translation initiation factor 3 subunit A [OS=Homo sapiens]	0	8.068	3	3	6	3	1	1382	166.5	6.79	0	3	0	0.00164959	10.454
583	High	Master Protein	Q9HCU5	Prolactin regulatory element-binding protein [OS=Homo sapiens]	0	14.955	21	4	7	4	1	417	45.4	7.88	12.11	4	0	0.0344052	10.296
584	High	Master Protein	P32969	60S ribosomal protein L9 [OS=Homo sapiens]	0	24.414	29	5	17	5	1	192	21.9	9.95	29.1	5	0	0.0061876	10.116
585	High	Master Protein	P28838	cytosol aminopeptidase [OS=Homo sapiens]	0	8.147	9	4	6	4	1	519	56.1	7.93	1.77	4	0	0.00525686	9.854
586	High	Master Protein	P19338	Nucleolin [OS=Homo sapiens]	0	149.324	35	29	134	29	1	710	76.6	4.7	274.82	29	0	0.0070698	9.749
587	High	Master Protein	P61254	60S ribosomal protein L26 [OS=Homo sapiens]	0	9.733	19	4	10	4	1	145	17.2	10.55	16.17	4	0	0.0070499	9.714
588	High	Master Protein	Q9HB71	Calcyclin-binding protein [OS=Homo sapiens]	0	21.154	42	7	13	7	1	228	26.2	8.25	17.95	7	0	0.0102831	9.544
589	High	Master Protein	P18621-3	Isoform 3 of 60S ribosomal protein L17 [OS=Homo sapiens]	0	7.437	11	2	3	2	1	228	26.4	10.1	6.47	2	0	0.0529759	9.524
590	High	Master Protein	P38159-1	RNA-binding motif protein, X chromosome [OS=Homo sapiens]	0	67.427	35	14	62	5	1	391	42.3	10.05	98.28	14	9	0.00135715	9.486
591	High	Master Protein	P62913	60S ribosomal protein L11 [OS=Homo sapiens]	0	13.981	21	3	12	3	1	178	20.2	9.6	16.46	3	0	0.00215992	9.282
592	High	Master Protein	P46779-3	Isoform 3 of 60S ribosomal protein L28 [OS=Homo sapiens]	0.001	3.892	8	2	4	2	1	169	19.1	10.83	0	2	0	0.00155111	9.203
593	High	Master Protein	P21796	voltage-dependent anion-selective channel protein 1 [OS=Homo sapiens]	0	37.304	42	9	32	8	1	283	30.8	8.54	58.12	9	0	0.0021133	9.118
594	High	Master Protein	P60866-2	Isoform 2 of 40S ribosomal protein S20 [OS=Homo sapiens]	0	9.065	21	3	7	3	1	142	16	9.32	8.91	3	0	0.00151354	9.057
595	High	Master Protein	P07355-2	Isoform 2 of Annexin A2 [OS=Homo sapiens]	0	42.299	35	9	23	9	1	357	40.4	8.37	27.58	9	0	0.0156406	9.034
596	High	Master Protein	P0C0S8	histone H2A type 1 [OS=Homo sapiens]	0	25.636	35	5	29	2	1	130	14.1	10.9	51.02	5	3	0.0102831	8.994
597	High	Master Protein	P10599-1	thioredoxin [OS=Homo sapiens]	0	9.74	31	3	7	3	1	105	11.7	4.92	13.75	3	0	0.0154178	8.829
598	High	Master Protein	P50613	Cyclin-dependent kinase 7 [OS=Homo sapiens]	0	9.493	9	3	4	3	1	346	39	8.47	5.97	3	0	0.0139284	8.537
599	High	Master Protein	Q96RS6	NudC domain-containing protein 1 [OS=Homo sapiens]	0	9.791	10	4	4	4	1	583	66.7	5.11	3.99	4	0	0.00929723	8.506
600	High	Master Protein	Q99459	Cell division cycle 5-like protein [OS=Homo sapiens]	0	52.386	28	15	29	15	1	802	92.2	8.18	44.19	15	0	0.00651205	8.473
601	High	Master Protein	P06576	ATP synthase subunit beta, mitochondrial [OS=Homo sapiens]	0	26.111	17	6	10	6	1	529	56.5	5.4	20.82	6	0	0.00214506	8.454
602	High	Master Protein	Q92620	Pre-mRNA-splicing factor ATP-dependent RNA helicase PRP16 [OS=Homo sapiens]	0	7.218	2	2	4	2	1	1227	140.4	6.54	5.59	2	0	0.0273385	8.453
603	High	Master Protein	Q9UMS4	Pre-mRNA-processing factor 19 [OS=Homo sapiens]	0	54.813	27	9	29	9	1	504	55.1	6.61	85.85	9	0	0.005235	8.336
604	High	Master Protein	P62750	60S ribosomal protein L23a [OS=Homo sapiens]	0	5.18	15	2	2	2	1	156	17.7	10.45	2.1	2	0	0.00539599	8.097
605	High	Master Protein	Q01081	Splicing factor U2AF 35 kDa subunit [OS=Homo sapiens]	0	18.873	25	4	11	4	1	240	27.9	8.81	14.82	4	0	0.0102954	7.992
606	High	Master Protein	P23284	peptidyl-prolyl cis-trans isomerase B [OS=Homo sapiens]	0	13.945	22	4	8	4	1	216	23.7	9.41	12.04	4	0	0.00411529	7.893
607	High	Master Protein	P0DMV8	heat shock 70 kDa protein 1A [OS=Homo sapiens]	0	57.68	27	13	41	11	1	641	70	5.66	79.13	13	0	0.00297293	7.877
608	High	Master Protein	Q5JRA6-1	Melanoma inhibitory activity protein 3 [OS=Homo sapiens]	0.001	3.876	1	2	3	2	1	1907	213.6	4.84	0	2	0	0.000972032	7.761
609	High	Master Protein	P39656	Dolichyl-diphosphooligosaccharide--protein glycosyltransferase 48 kDa subunit [OS=Homo sapiens]	0	14.582	9	4	9	4	1	456	50.8	6.55	19.93	4	0	0.0052756	7.489
610	High	Master Protein	P29401-2	Isoform 2 of Transketolase [OS=Homo sapiens]	0	16.96	11	5	10	5	1	631	68.8	7.52	13.73	5	0	0.00611894	7.424
611	High	Master Protein	P61353	60S ribosomal protein L27 [OS=Homo sapiens]	0	6.378	24	2	5	2	1	136	15.8	10.56	9.77	2	0	0.0268072	7.339
612	High	Master Protein	P62847-4	Isoform 4 of 40S ribosomal protein S24 [OS=Homo sapiens]	0	8.792	9	2	7	2	1	289	32.4	10.15	9.89	2	0	0.0156369	7.322
613	High	Master Protein	P07195	L-lactate dehydrogenase B chain [OS=Homo sapiens]	0	39.132	29	9	32	8	1	334	36.6	6.05	57.2	9	0	0.00159114	7.058
614	High	Master Protein	P27144	Adenylate kinase 4, mitochondrial [OS=Homo sapiens]	0	5.48	11	2	2	2	1	223	25.3	8.4	0	2	0	0.0435197	7.044
615	High	Master Protein	Q14671-3	Isoform 3 of Pumilio homolog 1 [OS=Homo sapiens]	0	5.675	2	2	4	2	1	1188	126.6	6.84	2.32	2	0	0.0196727	7.038
616	High	Master Protein	P28074-1	proteasome subunit beta type-5 [OS=Homo sapiens]	0	6.173	10	2	3	2	1	263	28.5	6.92	2.5	2	0	0.00596758	6.952
617	High	Master Protein	P62318	small nuclear ribonucleoprotein sm d3 [OS=Homo sapiens]	0	11.169	32	3	5	3	1	126	13.9	10.32	10.82	3	0	0.0131333	6.836
618	High	Master Protein	P27797	Calreticulin [OS=Homo sapiens]	0	7.029	8	3	3	3	1	417	48.1	4.44	6.53	3	0	0.0136873	6.624
619	High	Master Protein	P11142-1	Heat shock cognate 71 kDa protein [OS=Homo sapiens]	0	116.333	43	24	89	21	1	646	70.9	5.52	146.8	24	3	0.00145659	6.574
620	High	Master Protein	P00338-3	Isoform 3 of L-lactate dehydrogenase A chain [OS=Homo sapiens]	0	31.166	26	9	28	8	1	361	39.8	8.43	39.15	9	1	0.00508237	6.242
621	High	Master Protein	P26038	Moesin [OS=Homo sapiens]	0	5.953	5	3	3	3	1	577	67.8	6.4	0	3	0	0.00192692	6.227
622	High	Master Protein	Q9UJW0-3	Isoform 3 of Dynactin subunit 4 [OS=Homo sapiens]	0	6.424	7	2	4	2	1	467	53.1	7.39	2.96	2	0	0.0119072	6.172
623	High	Master Protein	E9PAV3	Nascent polypeptide-associated complex subunit alpha, muscle-specific form [OS=Homo sapiens]	0	13.109	1	2	6	2	1	2078	205.3	9.58	11.09	2	0	0.00957878	5.968
624	High	Master Protein	P16402	Histone H1.3 [OS=Homo sapiens]	0	50.653	23	8	55	8	1	221	22.3	11.02	146.46	8	0	0.00824977	5.655
625	High	Master Protein	Q96CX2	BTB/POZ domain-containing protein KCTD12 [OS=Homo sapiens]	0	11.453	14	4	7	4	1	325	35.7	5.64	3.94	4	0	0.0131748	5.641
626	High	Master Protein	P63244	Receptor of activated protein C kinase 1 [OS=Homo sapiens]	0	78.314	69	16	62	16	1	317	35.1	7.69	125.78	16	0	0.0168779	5.292
627	High	Master Protein	Q96CW1	AP-2 complex subunit mu [OS=Homo sapiens]	0	10.215	10	3	4	3	1	435	49.6	9.54	8.3	3	0	0.0523286	5.24
628	High	Master Protein	O75223-1	gamma-glutamylcyclotransferase [OS=Homo sapiens]	0	11.323	20	3	9	3	1	188	21	5.14	8.48	3	0	0.00240492	5.158
629	High	Master Protein	P08559-4	Isoform 4 of Pyruvate dehydrogenase E1 component subunit alpha, somatic form, mitochondrial [OS=Homo sapiens]	0	12.262	12	4	12	4	1	428	47.5	8.54	13.64	4	0	0.0171779	5.019
630	High	Master Protein	P62805	histone H4 [OS=Homo sapiens]	0	45.424	52	7	49	7	1	103	11.4	11.36	87.98	7	0	0.0412897	4.98
631	High	Master Protein	Q8N201	integrator complex subunit 1 [OS=Homo sapiens]	0.001	4.353	1	2	3	2	1	2190	244.1	6.13	0	2	0	0.0180722	4.775
632	High	Master Protein	P11310-2	Isoform 2 of Medium-chain specific acyl-CoA dehydrogenase, mitochondrial [OS=Homo sapiens]	0	9.224	8	2	5	2	1	425	47	8.31	8.65	2	0	0.0116216	4.756
633	High	Master Protein	P38117-2	Isoform 2 of Electron transfer flavoprotein subunit beta [OS=Homo sapiens]	0	6.146	6	2	5	2	1	346	37.4	7.17	9.26	2	0	0.0169079	4.49
634	High	Master Protein	Q9NWH9-1	SAFB-like transcription modulator [OS=Homo sapiens]	0	37.072	12	9	20	9	1	1034	117.1	7.87	44.47	9	0	0.00467977	4.474
635	High	Master Protein	P85037-1	Forkhead box protein K1 [OS=Homo sapiens]	0	17.721	12	6	8	6	1	733	75.4	9.32	9.18	6	0	0.0475442	4.282
636	High	Master Protein	O95696-2	Isoform 2 of Bromodomain-containing protein 1 [OS=Homo sapiens]	0	26.425	9	10	19	10	1	1189	133.2	8.59	24.98	10	0	0.0137262	3.931
637	High	Master Protein	O15372	Eukaryotic translation initiation factor 3 subunit H [OS=Homo sapiens]	0.001	4.214	6	2	2	2	1	352	39.9	6.54	2.1	2	0	0.0168446	3.889
638	High	Master Protein	P67809	Nuclease-sensitive element-binding protein 1 [OS=Homo sapiens]	0	6.005	15	2	5	2	1	324	35.9	9.88	2.49	2	0	0.043031	3.846
639	High	Master Protein	P06733-1	alpha-enolase [OS=Homo sapiens]	0	37.234	36	10	34	10	1	434	47.1	7.39	42.76	10	0	0.00785842	3.477
640	High	Master Protein	Q96B26	Exosome complex component RRP43 [OS=Homo sapiens]	0	6.693	14	3	3	3	1	276	30	5.3	1.64	3	0	0.0343303	3.412
641	High	Master Protein	P04406-1	glyceraldehyde-3-phosphate dehydrogenase [OS=Homo sapiens]	0	58.024	39	11	61	11	1	335	36	8.46	101.87	11	0	0.0383995	3.124
642	High	Master Protein	P62244	40S ribosomal protein S15a [OS=Homo sapiens]	0	16.219	32	5	12	5	1	130	14.8	10.13	19.51	5	0	0.036364	2.783
643	High	Master Protein	P05165-1	Propionyl-CoA carboxylase alpha chain, mitochondrial [OS=Homo sapiens]	0	285.065	67	48	275	48	1	728	80	7.52	522.65	48	0	0.00770761	2.475
644	High	Master Protein	P60174	Triosephosphate isomerase [OS=Homo sapiens]	0	7.615	11	2	5	2	1	286	30.8	5.92	7	2	0	0.0505274	2.234
645	High	Master Protein	P11498	pyruvate carboxylase, mitochondrial [OS=Homo sapiens]	0	347.759	63	60	429	60	1	1178	129.6	6.84	728.4	60	0	0.00578485	2.068
